# Supplementary material
Source: HighWire-hosted journal article supplement (doi:10.1101/rna.080321.124)
Supplement: Supplemental_Figure_Legends.docx [file Supplemental_Figure_Legends.docx]

**SUPPLEMENTAL FIGURE LEGEND**

**Figure S1. *In silico* analysis of canonical and non-canonical rG4 motifs in various RNA and DNA viruses, compared to mammals.**

Scatter plots show the density (motifs per kb) of four rG4 classes. Scatter plots present virus species with double-stranded DNA (dsDNA), double-stranded RNA (dsRNA), and single-stranded RNA (ssRNA), as well as the genome and transcriptome of mammalian species, as indicated.

**Figure S2. d-rG4-seq read counts across the OC43 genome.**

Alignment tracks indicate sequencing read coverage across the 30-kb OC43 genome in samples treated without DMS (D-) or with DMS (D+), under Li+ or K+ conditions.

**Figure S3. K+ dependent RT-stops identify the potential rG4 folding motifs.**

(A) Nucleotide composition at 3 nt upstream of strong RT-stop sites. Strong RT-stop sites are identified from the nucleotide positions accumulating more than 50% RT-stop frequency and >20 reads.

(B) K+ dependent RT-stop formation in MALAT1*.* RT-stops are plotted on MALAT1 RNA region. K+ dependent RT-stop frequency is calculated by subtracting the RT-stop frequency of the Li+ sample from the K+ RT-stop. The nucleotide sequences of the RT-stop sites are shown with different colors as indicated. Motif sequences located in the immediate upstream sequences of strong RT-stop sites are shown in the left panel.

(C) G-quadruplex ligand binding to two distinct OC43 rG4-forming fragments. *In vitro* transcribed RNA fragments were incubated with 10 mM ligand in reaction buffers containing either K⁺ or Li⁺. The ligand-RNA complexes were separated by electrophoresis on a 12% native TBE acrylamide gel. For conditions including K⁺, 50 mM KCl was added to the gel running buffer. The sequences of the tested RNA fragments are shown in the right panel.

**Figure S4.  d-rG4-seq uncovers the RNA duplex structures.**

(A) Nucleotide frequency appears at the RT-stop sites. The total RT-stop frequency at the indicated nucleotides in the DMS-treated (+) and untreated (-) samples are shown.

(B) Scatterplot of Gini index values of 391 HCT8 host transcripts (grey) versus the OC43 genomic RNA (red dot). Two biological replicates are plotted against each other. r=0.93 (Pearson correlation).

**Figure S5 Log2 transformed RPKM density plot, related to figure 4A.**

Log2 transformed aligned read accumulation as shown in Figure 4A. OC43 genome annotation is indicated on top.

**Figure S6. Analysis of differentially expressed genes (DEG) in PDS-, phenDC3- and remdesivir-treated HCT8 cells, related to figure 6D.**

Volcano plot showing DNA damage response gene (GO:0006974) expression changes. DEGs are marked with red color.
