# Supplementary material
Source: HighWire-hosted journal article supplement (doi:10.1101/rna.080321.124)
Supplement: Supplemental_Table_Legends.docx [file Supplemental_Table_Legends.docx]

**SUPPLEMENTAL TABLE LEGENDS**

**Table S1.** Number of mapped reads in the OC43 d-rG4-seq libraries.

**Table S2.** List of *in vitro* rG4 sites identified in DMSO control samples.

**Table S3.** List of *in vivo* rG4 sites identified in DMSO control samples.

**Table S4.** List of *in vitro* rG4 sites identified in phenDC3 treated samples.

**Table S5.** List of *in vivo* rG4 sites identified in phenDC3 treated samples.

**Table S6.** List of *in vitro* rG4 sites identified in PDS treated samples.

**Table S7.** List of *in vivo* rG4 sites identified in PDS treated samples.

**Table S8.** List of *in vitro* rG4 sites identified in CX-5461 treated samples.

**Table S9.** List of *in vivo* rG4 sites identified in CX-5461 treated samples.

**Table S10.** List of differentially expressed genes (DEGs) in the rG4 compound treated samples.

**Table S11.** Primers for d-rG4-seq preparation and RT-qPCR.
