# Supplementary material
Source: HighWire-hosted journal article supplement (doi:10.1101/rna.080321.124)
Supplement: Supplemental_Table_S1.xlsx [file Supplemental_Table_S1.xlsx]

## Sheet: Sheet1
	Biological replicate1				Biological replicate2
	Total reads	OC43 reads	OC43 reads/Total reads		Total reads	OC43 reads	OC43 reads/Total reads
DMSO D+ Li	80116849	1668662	0.0208279		32724827	1239571	0.0378786
DMSO D+ K	31208912	705075	0.0225921		15001087	461879	0.0307897
DMSO D- Li	43720725	1392813	0.031857		23491246	1023362	0.0435635
DMSO D- K	26855206	666994	0.0248367		13124610	558151	0.0425271
PDS D+ Li	25686080	974150	0.0379252		55287846	1779324	0.0321829
PDS D+ K	13752089	443402	0.0322425		54148616	1979975	0.0365656
PDS D- Li	22660977	1023584	0.0451695		17134690	538351	0.0314188
PDS D- K	39251983	1751701	0.0446271		17479807	590225	0.0337661
PhenDC3 D+ Li	56396235	2142572	0.0379914		90635742	1783759	0.0196805
PhenDC3 D+ K	51166495	2098253	0.0410083		41419032	922532	0.0222731
PhenDC3 D- Li	17948914	802587	0.0447151		37392991	991134	0.0265059
PhenDC3 D- K	25897710	944920	0.0364866		33599836	784471	0.0233475
CX5461 D+ Li	36231495	1238952	0.0341954		52665829	2006538	0.0380994
CX5461 D+ K	37518177	1349623	0.0359725		35754047	1445773	0.0404366
CX5461 D- Li	31464045	1051251	0.0334112		12369300	546677	0.0441963
CX5461 D- K	20343755	751396	0.036935		12969482	477700	0.0368326
