# Supplementary material
Source: HighWire-hosted journal article supplement (doi:10.1101/rna.080321.124)
Supplement: Supplemental_Table_S2.xlsx [file Supplemental_Table_S2.xlsx]

## Sheet: DMSO_DN-result.csv.new
In vitro rG4 DMSO											Biological rep1					Biological rep2
chromosome	start	end	rG4_structural_class	strand	rG4_intervals	splicing	sequence_diagram	gene_names	coding_regions	transcript_ids	BR1_K+ coverage	BR1_K+stop	BR1_Li+coverage	BR1_Li+stop		DNrep2_K_cov	DNrep2_K_stop	DNrep2_Li_cov	DNrep2_Li_stop
chr1	1046819	1046820	bulges	+	chr1:1046701-1046735:+,chr1:1046819-1046820:+	TRUE	5'- GGGGACCAGGAGGCCAGTGGGGGTGGCTCTGGGGGGCTCGAGCCC -3' rG4seq-K ----------------------------------*----------	AGRN|ENSG00000188157.15	ENST00000379370.7;ENST00000620552.4;ENST00000651234.1;ENST00000652369.1	CDS	21	13	11	1		28	20	10	1
chr1	1056047	1056049	bulges	+	chr1:1056029-1056048:+	FALSE	5'- GGGCGGCGGTGGGGCTGGGTGCCGTGTTA -3' rG4seq-K ------------------**---------	AGRN|ENSG00000188157.15;ENSG00000242590|ENSG00000242590.1	ENST00000379370.7;ENST00000418300.1;ENST00000461111.1;ENST00000620552.4;ENST00000651234.1;ENST00000652369.1	3UTR;non_coding	70	35	27	1		101	44	30	0
chr1	10411431	10411432	two-quartet	+	chr1:10399695-10399704:+,chr1:10411417-10411431:+	TRUE	5'- GGCTTTGTGGTGGGAGATGAGGGAGCAGGCCAC -3' rG4seq-K -----------------------*---------	PGD|ENSG00000142657.21	ENST00000270776.13;ENST00000460189.1;ENST00000465632.5;ENST00000477958.5;ENST00000483936.5;ENST00000487775.1;ENST00000491493.5	CDS	30	16	17	1		42	33	16	2
chr1	11974658	11974659	bulges	+	chr1:11972982-11972997:+,chr1:11974652-11974660:+	TRUE	5'- GGGGTGGATTACGAGGGCGGGGGCTGTCGGTTC -3' rG4seq-K ---------------------*-----------	PLOD1|ENSG00000083444.17	ENST00000196061.5;ENST00000481933.1;ENST00000491536.5	CDS	23	15	6	0		36	29	6	0
chr1	15934654	15934655	bulges	+	chr1:15934626-15934655:+	FALSE	5'- GTCCGGCAGACGCGGGCTCAGGGGCGGGGCTGCGTGTGA -3' rG4seq-K ----------------------------*----------	SPEN|ENSG00000065526.12	ENST00000375759.8	CDS	13	8	7	0		24	19	6	0
chr1	16395402	16395404	canonical/G3L1-7	+	chr1:16395382-16395404:+	FALSE	5'- GGGAAAGGGTGGGGGTTAGGGGAAGGTTGGGG -3' rG4seq-K --------------------**----------	SZRD1|ENSG00000055070.17	ENST00000401088.9;ENST00000401089.3;ENST00000471507.5;ENST00000472351.5;ENST00000492354.1	3UTR	10	5	24	2		23	11	17	1
chr1	16395413	16395416	canonical/G3L1-7	+	chr1:16395382-16395414:+	FALSE	5'- GGGAAAGGGTGGGGGTTAGGGGAAGGTTGGGGGGACCCAGCA -3' rG4seq-K -------------------------------***--------	SZRD1|ENSG00000055070.17	ENST00000401088.9;ENST00000401089.3;ENST00000471507.5;ENST00000472351.5;ENST00000492354.1	3UTR	136	39	39	1		151	45	43	3
chr1	16397387	16397389	bulges	+	chr1:16397372-16397388:+	FALSE	5'- GGGGGAGGCGGGAGGGAGATGAGGAA -3' rG4seq-K ---------------**---------	SZRD1|ENSG00000055070.17	ENST00000401088.9;ENST00000401089.3;ENST00000492354.1	3UTR	48	39	14	0		55	48	16	3
chr1	19657454	19657455	potential G-quadruplex & G>=40%	+	chr1:19657395-19657455:+	FALSE	5'- GCTTCTAGAGATGTGCCTGTGGGAGGGGGAGGAAGTTGGCTGAGCCATTGAGTGCTGGGGGAGGCCATCC -3' rG4seq-K -----------------------------------------------------------*----------	NBL1|ENSG00000158747.15	ENST00000375136.8;ENST00000548815.2;ENST00000602662.1;ENST00000615215.4;ENST00000618761.4;ENST00000621723.4;ENST00000622566.4	3UTR	13	10	6	0		15	7	10	0
chr1	22092613	22092615	canonical/G3L1-7	+	chr1:22092594-22092615:+	FALSE	5'- GGGGGTAGGGTGGGGGTGGGGAGAACACTTA -3' rG4seq-K -------------------**----------	CDC42|ENSG00000070831.17	ENST00000344548.7;ENST00000400259.5;ENST00000648594.1;ENST00000656825.1	3UTR	43	29	15	1		33	22	23	2
chr1	23694665	23694667	two-quartet	+	chr1:23693897-23693913:+,chr1:23694659-23694666:+	TRUE	5'- GGAGAAGGGTCTAAAGGTGCGGGAGTATGAGTT -3' rG4seq-K ----------------------**---------	RPL11|ENSG00000142676.14	ENST00000374550.8;ENST00000443624.6;ENST00000458455.2;ENST00000467075.2;ENST00000482370.2;ENST00000643754.2	3UTR;CDS	249	75	358	32		243	80	252	19
chr1	24842992	24842993	bulges	+	chr1:24842964-24842991:+	FALSE	5'- GGTGGACTGAGTGGTGCGAGGTGGAGGGCTAACAAGA -3' rG4seq-K ----------------------------*--------	CLIC4|ENSG00000169504.15	ENST00000374379.9;ENST00000488683.1	3UTR	34	23	9	2		25	17	9	2
chr1	26994080	26994081	bulges	+	chr1:26994047-26994079:+	FALSE	5'- GGGGGCTCTGGCGCGGCTGCGGGGGCGGGGGGCCGCGCGCTG -3' rG4seq-K ---------------------------------*--------	TRNP1|ENSG00000253368.4	ENST00000522111.3	CDS	10	8	6	0		11	7	6	0
chr1	32043424	32043425	two-quartet	+	chr1:32043392-32043424:+	FALSE	5'- GGTTTTGAAGAGGTTGATGGTGGTGGGGAGGGAAGGCCTCCT -3' rG4seq-K --------------------------------*---------	KHDRBS1|ENSG00000121774.18	ENST00000307714.12;ENST00000327300.12;ENST00000484270.2	3UTR	43	27	15	0		44	31	13	2
chr1	32170924	32170925	canonical/G3L1-7	+	chr1:32170906-32170924:+	FALSE	5'- GGGAGGGGAGGGGATGGGAAGCACCACC -3' rG4seq-K ------------------*---------	ENSG00000250135|ENSG00000250135.1;KPNA6|ENSG00000025800.14	ENST00000373625.8;ENST00000471599.5;ENST00000515055.1	3UTR;non_coding	10	9	6	0		16	16	7	0
chr1	32171382	32171383	canonical/G3L1-7	+	chr1:32171362-32171382:+	FALSE	5'- GGGAGGTGGGAGGGGAAGGGAGAAATCCAA -3' rG4seq-K --------------------*---------	ENSG00000250135|ENSG00000250135.1;KPNA6|ENSG00000025800.14	ENST00000373625.8;ENST00000471599.5;ENST00000515055.1	3UTR;non_coding	31	23	9	2		43	33	6	1
chr1	32332158	32332160	two-quartet	+	chr1:32332144-32332159:+	FALSE	5'- GGAGGGAGAGGGGGGCCGCAAGAAC -3' rG4seq-K --------------**---------	HDAC1|ENSG00000116478.12	ENST00000373548.8;ENST00000471488.1;ENST00000476391.5	CDS	62	47	14	0		79	52	25	1
chr1	36303874	36303876	longloop	+	chr1:36303838-36303875:+	FALSE	5'- GGGGCCGGGGCCGAGGAGCCTTTCCTCGGGGTCGGGGCCGGTTCATG -3' rG4seq-K ------------------------------------**---------	THRAP3|ENSG00000054118.15	ENST00000354618.10;ENST00000469141.6;ENST00000648638.1	CDS	52	22	22	0		47	17	28	2
chr1	36304311	36304312	canonical/G3L1-7	+	chr1:36304286-36304311:+	FALSE	5'- GGGGTGGGGGCAGGGGTAGGGCGGGAGAGCGATGC -3' rG4seq-K -------------------------*---------	THRAP3|ENSG00000054118.15	ENST00000354618.10;ENST00000648638.1	3UTR	83	64	22	2		102	75	15	1
chr1	37481681	37481682	two-quartet	+	chr1:37481664-37481681:+	FALSE	5'- GGGTGGCAAGCGGGTGGTGTGCTATGA -3' rG4seq-K -----------------*---------	ZC3H12A|ENSG00000163874.11	ENST00000373087.7;ENST00000472312.1;ENST00000640233.1	CDS	32	31	6	1		54	49	8	1
chr1	43622346	43622347	potential G-quadruplex & G>=40%	+	chr1:43622287-43622347:+	FALSE	5'- ATGCTTCTTCTCATGGGGTGGGGTTGGGGCAAAGCCTCCTTTTTAATACATTAAGTGGGGTAGACTGAGG -3' rG4seq-K -----------------------------------------------------------*----------	PTPRF|ENSG00000142949.17	ENST00000359947.9;ENST00000372407.4;ENST00000414879.5;ENST00000429895.5;ENST00000438120.5;ENST00000477970.1;ENST00000496447.5	3UTR	12	6	19	0		13	12	8	0
chr1	43622724	43622725	bulges	+	chr1:43622687-43622724:+	FALSE	5'- GGCCACATTGACAGTGGTGGGCGGGGAGAAGATAGGGAACACTCATC -3' rG4seq-K -------------------------------------*---------	PTPRF|ENSG00000142949.17	ENST00000359947.9;ENST00000372407.4;ENST00000414879.5;ENST00000429895.5;ENST00000477970.1;ENST00000496447.5	3UTR	43	37	7	1		37	35	8	1
chr1	67685302	67685304	potential G-quadruplex & G>=40%	+	chr1:67685244-67685304:+	FALSE	5'- TCGTGCGGCCCGTGGCGAGGCGAGGTCCGGGGAGCGAGCGAGCAAGCAAGGCGGGAGGGGTGGCCGGAGC -3' rG4seq-K ----------------------------------------------------------**----------	GADD45A|ENSG00000116717.13	ENST00000370985.4;ENST00000370986.9;ENST00000460575.1;ENST00000648742.1;ENST00000650283.1	5UTR	22	12	18	0		30	13	14	1
chr1	85583134	85583136	bulges	+	chr1:85583108-85583137:+	FALSE	5'- GGAGAAAATGGGCGGGGGTGGTGTGGGTGATGGGACTCA -3' rG4seq-K --------------------------**-----------	CCN1|ENSG00000142871.18	ENST00000451137.7;ENST00000674743.1;ENST00000674818.1;ENST00000675083.1;ENST00000676007.1	3UTR	58	44	29	3		73	52	26	1
chr1	85583618	85583619	bulges	+	chr1:85583591-85583618:+	FALSE	5'- GGGGAGGGAGGGGAAATGTAATACTGGAATAATTTGT -3' rG4seq-K ---------------------------*---------	CCN1|ENSG00000142871.18	ENST00000451137.7;ENST00000674743.1;ENST00000674818.1;ENST00000675083.1;ENST00000676007.1	3UTR	39	24	37	0		41	24	16	0
chr1	116404624	116404626	bulges	+	chr1:116404608-116404625:+	FALSE	5'- GGGGGGAGGGGGGAGGGCTGCCTGAAA -3' rG4seq-K ----------------**---------	ATP1A1|ENSG00000163399.16	ENST00000295598.10;ENST00000369496.8;ENST00000440951.1;ENST00000537345.5	3UTR	176	97	50	2		181	102	58	2
chr1	151249399	151249401	canonical/G3L1-7	+	chr1:151249380-151249400:+	FALSE	5'- GGGAGGGCTGGGTCTTAGGGAAAGGAATGG -3' rG4seq-K -------------------**---------	PIP5K1A|ENSG00000143398.20	ENST00000349792.9;ENST00000368888.9;ENST00000368890.8;ENST00000409426.5	3UTR	64	25	21	1		51	23	17	1
chr1	151249410	151249412	longloop	+	chr1:151249380-151249412:+	FALSE	5'- GGGAGGGCTGGGTCTTAGGGAAAGGAATGGGGAAGCAACATT -3' rG4seq-K ------------------------------**----------	PIP5K1A|ENSG00000143398.20	ENST00000349792.9;ENST00000368888.9;ENST00000368890.8;ENST00000409426.5	3UTR	120	23	31	1		105	22	26	0
chr1	155018214	155018215	canonical/G3L1-7	+	chr1:155018193-155018216:+	FALSE	5'- GGGGAGGGGTCACAGGGAGGGGGTAGCGGGACC -3' rG4seq-K ---------------------*-----------	ZBTB7B|ENSG00000160685.14	ENST00000368426.3;ENST00000417934.6;ENST00000535420.6	3UTR	18	16	9	1		41	40	11	0
chr1	155062699	155062701	canonical/G3L1-7	+	chr1:155062677-155062701:+	FALSE	5'- GGGGGCTTGGGGAGGGGCTGGGGGTTGGACGGGA -3' rG4seq-K ----------------------**----------	ADAM15|ENSG00000143537.14	ENST00000271836.10;ENST00000355956.6;ENST00000356955.7;ENST00000359280.8;ENST00000360674.8;ENST00000368412.7;ENST00000368413.5;ENST00000449910.6;ENST00000461234.5;ENST00000464824.2;ENST00000472434.5;ENST00000474709.5;ENST00000498481.6;ENST00000526491.5;ENST00000527418.5;ENST00000529473.5	3UTR	50	28	22	0		57	35	21	2
chr1	155320639	155320640	two-quartet	+	chr1:155320623-155320639:+	FALSE	5'- GGGCGGGGAGAGGAGGCTCTCAATAA -3' rG4seq-K ----------------*---------	FDPS|ENSG00000160752.15	ENST00000356657.10;ENST00000368356.9;ENST00000467076.5;ENST00000490140.1;ENST00000492244.5;ENST00000611010.4;ENST00000612683.1	3UTR	25	11	29	2		27	17	16	2
chr1	156138703	156138704	bulges	+	chr1:156138675-156138704:+	FALSE	5'- GGGGGGCAGTGGGGGTGGCAGCTTCGGGGACAATCTGGT -3' rG4seq-K ----------------------------*----------	LMNA|ENSG00000160789.24	ENST00000361308.9;ENST00000368299.7;ENST00000368300.9;ENST00000448611.6;ENST00000473598.6;ENST00000506981.1;ENST00000674518.1;ENST00000674600.1;ENST00000675455.1;ENST00000675667.1;ENST00000675874.1;ENST00000675881.1;ENST00000675939.1;ENST00000675989.1;ENST00000676208.1;ENST00000676385.2;ENST00000676434.1;ENST00000682650.1;ENST00000683032.1;ENST00000683773.1;ENST00000684195.1	3UTR;CDS	23	13	9	0		42	28	11	0
chr1	156139795	156139796	two-quartet	+	chr1:156139778-156139798:+	FALSE	5'- GGGAATGAGGTGGGAGGTGGAAGAAGGGAG -3' rG4seq-K -----------------*------------	LMNA|ENSG00000160789.24	ENST00000368300.9;ENST00000448611.6;ENST00000675881.1;ENST00000683773.1	3UTR;CDS	19	15	13	2		18	12	8	0
chr1	156139912	156139914	canonical/G3L1-7	+	chr1:156139889-156139913:+	FALSE	5'- GGGGTGCTGGGAGGAGGGAGAGGGAGGTCACTGG -3' rG4seq-K -----------------------**---------	LMNA|ENSG00000160789.24	ENST00000368300.9;ENST00000448611.6;ENST00000675881.1;ENST00000683773.1	3UTR	40	21	41	12		42	24	26	4
chr1	156139929	156139931	bulges	+	chr1:156139897-156139930:+	FALSE	5'- GGGAGGAGGGAGAGGGAGGTCACTGGAAAGGGGAGAGCCTGCT -3' rG4seq-K --------------------------------**---------	LMNA|ENSG00000160789.24	ENST00000368300.9;ENST00000448611.6;ENST00000675881.1	3UTR	124	36	53	2		148	50	39	1
chr1	156139981	156139982	bulges	+	chr1:156139950-156139980:+	FALSE	5'- GTGGAGGAGGAAGGCAAGAGGGGGTGGAGGGGTGTGGCAG -3' rG4seq-K -------------------------------*--------	LMNA|ENSG00000160789.24	ENST00000368300.9;ENST00000448611.6;ENST00000675881.1	3UTR	29	17	14	1		30	16	20	2
chr1	156139987	156139988	bulges	+	chr1:156139955-156139987:+	FALSE	5'- GGAGGAAGGCAAGAGGGGGTGGAGGGGTGTGGCAGTGGTTTT -3' rG4seq-K --------------------------------*---------	LMNA|ENSG00000160789.24	ENST00000368300.9;ENST00000448611.6;ENST00000675881.1	3UTR	71	33	16	0		85	40	21	1
chr1	160213713	160213714	canonical/G3L1-7	+	chr1:160213688-160213713:+	FALSE	5'- GGGGATGGGGGTCAGGGGCTAGGGGAGG -3' rG4seq-K -------------------------*--	PEA15|ENSG00000162734.13	ENST00000360472.9;ENST00000368076.1;ENST00000368077.5;ENST00000488858.1	3UTR	14	10	6	0		19	15	8	0
chr1	160214721	160214723	potential G-quadruplex & G>=40%	+	chr1:160214663-160214723:+	FALSE	5'- AGCATTAACTTATTGTCTAGGCCAGAGCGGGGGTGGGAGGGGAATGCCACAGTGAAGGGAGTGGCAGAAT -3' rG4seq-K ----------------------------------------------------------**----------	PEA15|ENSG00000162734.13	ENST00000360472.9;ENST00000368076.1	3UTR	52	28	20	2		46	31	16	2
chr1	160214873	160214875	potential G-quadruplex & G>=40%	+	chr1:160214815-160214875:+	FALSE	5'- CAAAGTTCAAGTTAGGAGCTTTTAGGATGTGGGAGTAAAACTTTAATGGGAGGGGAGGGCTGGCTGCTGG -3' rG4seq-K ----------------------------------------------------------**----------	PEA15|ENSG00000162734.13	ENST00000360472.9;ENST00000368076.1	3UTR	37	26	15	1		51	33	14	0
chr1	171541109	171541111	bulges	+	chr1:171541087-171541110:+	FALSE	5'- GGGCGTGGCAGGGGTGGTAGGGGACACACTCGA -3' rG4seq-K ----------------------**---------	PRRC2C|ENSG00000117523.18	ENST00000338920.8;ENST00000367742.7;ENST00000426496.6;ENST00000647382.2	CDS	47	37	31	3		67	43	16	0
chr1	171591885	171591887	canonical/G3L1-7	+	chr1:171591865-171591886:+	FALSE	5'- GGGGATTGGGAGGGGGGCGGGAAAACATGGA -3' rG4seq-K --------------------**---------	PRRC2C|ENSG00000117523.18	ENST00000338920.8;ENST00000367742.7;ENST00000426496.6;ENST00000495585.1;ENST00000498596.5;ENST00000644916.1;ENST00000647382.2	3UTR	49	34	6	1		56	43	21	2
chr1	183243486	183243487	longloop	+	chr1:183243448-183243487:+	FALSE	5'- GGGCTCGGGAGCCATGTCATGTGAGTGGGTGGGATGGGGACATTTGAAC -3' rG4seq-K --------------------------------------*----------	LAMC2|ENSG00000058085.15	ENST00000264144.5;ENST00000476255.1	3UTR	13	8	10	0		30	14	8	0
chr1	223745342	223745343	bulges	+	chr1:223745317-223745342:+	FALSE	5'- GGCGAGTGGGTGGAGGTGGTGGTGGATGACAGGCT -3' rG4seq-K -------------------------*---------	CAPN2|ENSG00000162909.18	ENST00000295006.6;ENST00000433674.6;ENST00000434648.5	CDS	35	26	22	6		39	23	14	0
chr1	223755546	223755549	bulges	+	chr1:223755516-223755550:+	FALSE	5'- GGAGGAGGAGGATGAGGACGAGGAGGATGGGGAGAGCGGCTGCA -3' rG4seq-K ------------------------------*-*-----------	CAPN2|ENSG00000162909.18	ENST00000295006.6;ENST00000433674.6;ENST00000480581.1	CDS	105	43	64	3		149	60	62	5
chr1	224356937	224356938	bulges	+	chr1:224356902-224356939:+	FALSE	5'- GCGGCGGCGACGGAGGAGGAGGATGGAGGCGGTGGTGTTCGTCTTCT -3' rG4seq-K -----------------------------------*-----------	CNIH4|ENSG00000143771.12	ENST00000366856.3;ENST00000366857.9;ENST00000366858.7;ENST00000366860.9;ENST00000465271.6;ENST00000468318.5;ENST00000477413.1	5UTR;CDS	28	17	9	0		27	14	8	0
chr10	6114073	6114074	two-quartet	+	chr10:6113579-6113581:+,chr10:6114048-6114073:+	TRUE	5'- GGAACATGGTTGGTGCGGGAGAGGTGGATGAAGACTT -3' rG4seq-K ---------------------------*---------	RBM17|ENSG00000134453.16	ENST00000379888.9;ENST00000446108.5;ENST00000465906.5;ENST00000467080.1;ENST00000476706.5	CDS	24	17	6	1		26	21	7	1
chr10	68339149	68339150	two-quartet	+	chr10:68338632-68338642:+,chr10:68339139-68339149:+	TRUE	5'- GGGCGTGGAAGTTATGGAGGTTTTGATGAC -3' rG4seq-K --------------------*---------	HNRNPH3|ENSG00000096746.18	ENST00000265866.12;ENST00000354695.5;ENST00000461310.5;ENST00000467249.1;ENST00000469172.5;ENST00000478698.1;ENST00000480987.5;ENST00000481819.5;ENST00000486854.5;ENST00000490442.5;ENST00000491200.5	CDS	19	12	12	2		22	17	7	0
chr10	68342044	68342046	bulges	+	chr10:68342015-68342044:+	FALSE	5'- GGCGGCATGAGTGGAGGTGGATGGCGTGGGATGTACTGA -3' rG4seq-K -----------------------------**--------	HNRNPH3|ENSG00000096746.18	ENST00000265866.12;ENST00000354695.5;ENST00000469172.5;ENST00000478698.1;ENST00000481819.5;ENST00000490442.5;ENST00000491200.5	CDS	60	28	26	0		90	34	19	1
chr10	72275604	72275605	bulges	+	chr10:72275581-72275604:+	FALSE	5'- GGAGGGAGGGGGGAGGTCGGAGGTCGTGGAGGT -3' rG4seq-K -----------------------*---------	DDIT4|ENSG00000168209.6	ENST00000307365.4;ENST00000471240.2;ENST00000473155.2;ENST00000491934.3;ENST00000681898.1	3UTR	50	33	31	2		55	28	33	1
chr10	72275613	72275614	bulges	+	chr10:72275581-72275616:+	FALSE	5'- GGAGGGAGGGGGGAGGTCGGAGGTCGTGGAGGTGGTTTGTGTATC -3' rG4seq-K --------------------------------*------------	DDIT4|ENSG00000168209.6	ENST00000307365.4;ENST00000471240.2;ENST00000473155.2;ENST00000491934.3;ENST00000681898.1	3UTR	109	55	33	8		113	60	30	1
chr10	72275765	72275767	bulges	+	chr10:72275743-72275766:+	FALSE	5'- GTAGGAAGGGGTGGGTGTCAGGGATCACTTGGG -3' rG4seq-K ----------------------**---------	DDIT4|ENSG00000168209.6	ENST00000307365.4;ENST00000471240.2;ENST00000473155.2;ENST00000491934.3;ENST00000681898.1	3UTR	29	24	49	1		53	28	48	3
chr10	72275776	72275777	canonical/G3L1-7	+	chr10:72275750-72275776:+	FALSE	5'- GGGGTGGGTGTCAGGGATCACTTGGGATCTTTGACA -3' rG4seq-K --------------------------*---------	DDIT4|ENSG00000168209.6	ENST00000307365.4;ENST00000471240.2;ENST00000473155.2;ENST00000491934.3;ENST00000681898.1	3UTR	91	59	29	3		105	59	23	0
chr10	72275877	72275879	canonical/G3L1-7	+	chr10:72275855-72275879:+	FALSE	5'- GGGGAGGGGCTGAGAGGGTGGGGGCTGGAACCCC -3' rG4seq-K ----------------------**----------	DDIT4|ENSG00000168209.6	ENST00000307365.4;ENST00000471240.2;ENST00000473155.2;ENST00000491934.3;ENST00000681898.1	3UTR	55	23	36	2		55	22	28	5
chr10	72887564	72887565	canonical/G3L1-7	+	chr10:72887539-72887564:+	FALSE	5'- GGGGTGTGTGGGAAGCAAGGGAGGGAGGACATGGA -3' rG4seq-K -------------------------*---------	MCU|ENSG00000156026.15	ENST00000357157.10;ENST00000373053.8;ENST00000536019.5;ENST00000605416.1;ENST00000605597.5	3UTR	13	12	6	2		17	17	6	0
chr10	91865079	91865081	canonical/G3L1-7	+	chr10:91865052-91865080:+	FALSE	5'- GGGAAGTTGGGGTTTTGGGGGGAGGGGGAGTATTAGTA -3' rG4seq-K ---------------------------**---------	TNKS2|ENSG00000107854.6	ENST00000371627.5	3UTR	103	49	43	3		125	74	22	7
chr10	100363721	100363723	bulges	+	chr10:100363701-100363724:+	FALSE	5'- GTGGCTGTGGGTGTGGGTGGGAGTGTGTCTGCT -3' rG4seq-K --------------------**-----------	SCD|ENSG00000099194.6	ENST00000370355.3	3UTR	146	118	44	4		214	166	25	3
chr11	397021	397022	bulges	+	chr11:397000-397021:+	FALSE	5'- GCGGTGGGGTTGGGAGCCGGGCCGACTATGA -3' rG4seq-K ---------------------*---------	PKP3|ENSG00000184363.10	ENST00000331563.7;ENST00000527442.5;ENST00000528036.5;ENST00000531857.1;ENST00000533249.5;ENST00000534401.5	CDS	12	10	12	0		11	9	12	1
chr11	404778	404780	bulges	+	chr11:404749-404780:+	FALSE	5'- GGACTTGGCTTCCGCAGGGCAGGGGGTGGGGCAGGGCTCAA -3' rG4seq-K -----------------------------**----------	PKP3|ENSG00000184363.10	ENST00000331563.7	3UTR	48	26	20	3		48	29	26	0
chr11	2397110	2397112	canonical/G3L1-7	+	chr11:2397085-2397111:+	FALSE	5'- GGGTCTTGGGGACTGGAGGGCAGGGGTCCTTCTGCC -3' rG4seq-K -------------------------**---------	CD81|ENSG00000110651.12	ENST00000263645.10;ENST00000468153.1;ENST00000481386.1;ENST00000526072.5;ENST00000531840.1	3UTR	58	11	28	1		22	11	29	1
chr11	9445401	9445402	canonical/G3L1-7	+	chr11:9445374-9445401:+	FALSE	5'- GGGATTTTGGGGGTGGGGGGGGATGGGAGGTACCTTA -3' rG4seq-K ---------------------------*---------	IPO7|ENSG00000205339.10	ENST00000379719.8	3UTR	116	101	31	9		144	126	19	7
chr11	57818246	57818248	longloop	+	chr11:57818210-57818247:+	FALSE	5'- GGGGTGTGGGTAATAGAACAGCCGTGGGCTTTTGGGGACCTTTAACT -3' rG4seq-K ------------------------------------**---------	CTNND1|ENSG00000198561.16;ENSG00000288534|ENSG00000288534.1	ENST00000358694.10;ENST00000361332.8;ENST00000361391.10;ENST00000361796.9;ENST00000399050.10;ENST00000415361.6;ENST00000426142.6;ENST00000428599.6;ENST00000524630.5;ENST00000525902.5;ENST00000526357.5;ENST00000526772.5;ENST00000527467.5;ENST00000528232.5;ENST00000528621.5;ENST00000529526.5;ENST00000529873.5;ENST00000529986.5;ENST00000530094.5;ENST00000530748.5;ENST00000531007.2;ENST00000531014.5;…	3UTR	39	14	25	1		37	13	30	1
chr11	62880970	62880971	bulges	+	chr11:62880935-62880970:+	FALSE	5'- GGAGAGCGTTCTGGGTCCGAGGGTCCAGGTAGGGGTTGAGCCACC -3' rG4seq-K -----------------------------------*---------	SLC3A2|ENSG00000168003.18	ENST00000338663.12;ENST00000377889.6;ENST00000377890.6;ENST00000377891.6;ENST00000535296.5;ENST00000538084.2;ENST00000539458.1;ENST00000541372.1;ENST00000541425.6;ENST00000544377.2;ENST00000679908.1;ENST00000680002.1;ENST00000680134.1;ENST00000680297.1;ENST00000680610.1;ENST00000680631.1;ENST00000680654.1;ENST00000680725.1;ENST00000680729.1;ENST00000681107.1;ENST00000681215.1;ENST00000681232.1;EN…	5UTR	21	7	29	0		32	14	26	3
chr11	64204454	64204456	longloop	+	chr11:64204430-64204456:+	FALSE	5'- GGGCATGTTATGGGGAGGGGAGGGGGTTCTTCCAGC -3' rG4seq-K ------------------------**----------	STIP1|ENSG00000168439.17	ENST00000305218.9;ENST00000358794.9	3UTR	187	88	51	2		209	104	50	3
chr11	64243462	64243464	longloop	+	chr11:64243292-64243311:+,chr11:64243450-64243464:+	TRUE	5'- GGGACCAGGGGCTGCTGGGGATGTGTGAGGGGGAAAAGCGCAA -3' rG4seq-K -------------------------------**----------	ENSG00000286264|ENSG00000286264.2;FKBP2|ENSG00000173486.14	ENST00000309366.9;ENST00000449942.6;ENST00000535135.7;ENST00000536642.5;ENST00000541388.1;ENST00000650773.1;ENST00000652094.1;ENST00000652762.2	3UTR;CDS	48	28	29	1		54	26	20	1
chr11	64318220	64318221	bulges	+	chr11:64318194-64318220:+	FALSE	5'- GGAAGTGGCCGTGGGGCGGGTATGGGACTAGCTGGC -3' rG4seq-K --------------------------*---------	PRDX5|ENSG00000126432.14	ENST00000265462.9;ENST00000347941.4;ENST00000352435.8	5UTR;CDS	53	26	8	0		62	38	11	1
chr11	65125946	65125948	bulges	+	chr11:65125921-65125947:+	FALSE	5'- GGGGGCCTCAGGAGGAGGGAGGTGGGTGTTGGAGCC -3' rG4seq-K -------------------------**---------	MRPL49|ENSG00000149792.9	ENST00000279242.7;ENST00000524482.5;ENST00000526319.5;ENST00000528529.1;ENST00000531705.1;ENST00000532671.1;ENST00000533943.1;ENST00000534078.1	3UTR	37	26	21	5		40	29	15	4
chr11	65211944	65211946	bulges	+	chr11:65211913-65211946:+	FALSE	5'- GGGGGTGCCAGAGGCACTAGGCTTGGGGTGGGGAGGTCCCGTG -3' rG4seq-K -------------------------------**----------	CAPN1|ENSG00000014216.16	ENST00000279247.11;ENST00000524773.5;ENST00000527323.5;ENST00000528165.5;ENST00000530567.1;ENST00000533820.5	3UTR	25	15	20	0		34	19	18	0
chr11	65422841	65422843	bulges	+	chr11:65422810-65422842:+	FALSE	5'- GGGAGGGATGCGCGCCTGGGTGTAGTTGTGGGGGAGGAAGTG -3' rG4seq-K -------------------------------**---------	NEAT1|ENSG00000245532.10	ENST00000499732.3;ENST00000501122.2;ENST00000601801.3;ENST00000612303.2;ENST00000685861.1;ENST00000687132.1	non_coding	32	13	32	0		36	17	12	0
chr11	65422923	65422926	two-quartet	+	chr11:65422909-65422925:+	FALSE	5'- GGGGGCGGGCTGGGGGTGCGAGAAGG -3' rG4seq-K --------------*-*---------	NEAT1|ENSG00000245532.10	ENST00000499732.3;ENST00000501122.2;ENST00000601801.3;ENST00000612303.2;ENST00000685861.1;ENST00000687132.1	non_coding	87	24	49	3		120	38	42	2
chr11	65423164	65423165	two-quartet	+	chr11:65423140-65423167:+	FALSE	5'- GGCAGGGAGAGGTAGAAGGGGTGGAGGAGTCAGGAGG -3' rG4seq-K ------------------------*------------	NEAT1|ENSG00000245532.10	ENST00000499732.3;ENST00000501122.2;ENST00000601801.3;ENST00000612303.2;ENST00000645023.1;ENST00000646243.1;ENST00000670617.1;ENST00000685861.1;ENST00000687132.1	non_coding	19	12	19	1		28	18	9	0
chr11	65423247	65423248	two-quartet	+	chr11:65423221-65423246:+	FALSE	5'- GGGTGCAGGGCTGCAGGAGGGCCGGGAGGGCTAAT -3' rG4seq-K --------------------------*--------	NEAT1|ENSG00000245532.10	ENST00000499732.3;ENST00000501122.2;ENST00000601801.3;ENST00000612303.2;ENST00000645023.1;ENST00000646243.1;ENST00000670617.1;ENST00000685861.1;ENST00000687132.1	non_coding	22	12	21	0		15	9	13	1
chr11	65423251	65423252	longloop	+	chr11:65423228-65423251:+	FALSE	5'- GGGCTGCAGGAGGGCCGGGAGGGCTAATCTTCA -3' rG4seq-K -----------------------*---------	NEAT1|ENSG00000245532.10	ENST00000499732.3;ENST00000501122.2;ENST00000601801.3;ENST00000612303.2;ENST00000645023.1;ENST00000646243.1;ENST00000670617.1;ENST00000685861.1;ENST00000687132.1	non_coding	48	26	18	0		70	49	15	0
chr11	65423876	65423877	potential G-quadruplex & G>=40%	+	chr11:65423817-65423877:+	FALSE	5'- CCTTCCCGCTGAGGCTGGGGTGGGGCGGATCGGTGTTGCTTGCCTGCAGAGAGGGTGGGGAGTGAATGTG -3' rG4seq-K -----------------------------------------------------------*----------	NEAT1|ENSG00000245532.10	ENST00000499732.3;ENST00000501122.2;ENST00000601801.3;ENST00000612303.2;ENST00000642367.1;ENST00000645023.1;ENST00000646243.1;ENST00000670617.1;ENST00000685861.1;ENST00000687132.1	non_coding	22	12	12	1		23	18	10	1
chr11	65423901	65423902	longloop	+	chr11:65423869-65423901:+	FALSE	5'- GGGTGGGGAGTGAATGTGCACCCTTGGGTGGGCCTGCAGCCA -3' rG4seq-K --------------------------------*---------	NEAT1|ENSG00000245532.10	ENST00000499732.3;ENST00000501122.2;ENST00000601801.3;ENST00000612303.2;ENST00000642367.1;ENST00000645023.1;ENST00000646243.1;ENST00000670617.1;ENST00000685861.1;ENST00000687132.1	non_coding	89	74	17	2		78	60	9	0
chr11	65424893	65424895	canonical/G3L1-7	+	chr11:65424866-65424894:+	FALSE	5'- GGGAGTTGTGGGGGACGGGGAGAAGGGGACAGCTTGGC -3' rG4seq-K ---------------------------**---------	NEAT1|ENSG00000245532.10	ENST00000499732.3;ENST00000501122.2;ENST00000601801.3;ENST00000642367.1;ENST00000645023.1;ENST00000646243.1;ENST00000670617.1;ENST00000685861.1;ENST00000687132.1	non_coding	92	81	45	1		146	115	29	6
chr11	65424987	65424989	canonical/G3L1-7	+	chr11:65424963-65424987:+	FALSE	5'- GGGAGGGATGAGGGTGAAGAAGGGGAGAGGGTTG -3' rG4seq-K ------------------------**--------	NEAT1|ENSG00000245532.10	ENST00000499732.3;ENST00000501122.2;ENST00000601801.3;ENST00000642367.1;ENST00000645023.1;ENST00000646243.1;ENST00000670617.1;ENST00000685861.1;ENST00000687132.1	non_coding	52	21	28	1		71	43	25	2
chr11	65425023	65425025	longloop	+	chr11:65424984-65425025:+	FALSE	5'- GGGGAGAGGGTTGGTTAGAGATACAGTGTGGGTGGTGGGGGTGGTAGGAAA -3' rG4seq-K ---------------------------------------**----------	NEAT1|ENSG00000245532.10	ENST00000499732.3;ENST00000501122.2;ENST00000601801.3;ENST00000645023.1;ENST00000646243.1;ENST00000670617.1;ENST00000685861.1;ENST00000687132.1	non_coding	17	13	6	1		43	20	18	0
chr11	65425028	65425029	two-quartet	+	chr11:65425013-65425028:+	FALSE	5'- GGGTGGTGGGGGTGGTAGGAAATGC -3' rG4seq-K ---------------*---------	NEAT1|ENSG00000245532.10	ENST00000499732.3;ENST00000501122.2;ENST00000601801.3;ENST00000645023.1;ENST00000646243.1;ENST00000670617.1;ENST00000685861.1;ENST00000687132.1	non_coding	56	30	11	0		81	33	14	0
chr11	65501243	65501245	two-quartet	+	chr11:65501235-65501246:+	FALSE	5'- GGGGGTGGGGGCAAAATATGT -3' rG4seq-K --------**-----------	MALAT1|ENSG00000251562.9	ENST00000534336.1;ENST00000619449.2	non_coding	428	200	218	11		497	221	206	15
chr11	65501558	65501560	bulges	+	chr11:65501527-65501561:+	FALSE	5'- GGATGGTCTTAACAGGGAAGAGAGAGGGTGGGGGAGAAAATGTT -3' rG4seq-K -------------------------------**-----------	MALAT1|ENSG00000251562.9	ENST00000534336.1;ENST00000619449.2	non_coding	534	430	387	17		706	537	248	8
chr11	65501904	65501906	bulges	+	chr11:65501874-65501905:+	FALSE	5'- GGCCTGTTACGGTTGGGATTGGTGGGGTGGGTTTAGGTAAT -3' rG4seq-K ------------------------------**---------	MALAT1|ENSG00000251562.9	ENST00000508832.2;ENST00000534336.1;ENST00000619449.2	non_coding	999	774	285	57		1167	906	178	24
chr11	65502614	65502615	longloop	+	chr11:65502587-65502615:+	FALSE	5'- GGGTGGGCTTTTGTTGATGAGGGAGGGGAAACTTTTTT -3' rG4seq-K ---------------------------*----------	MALAT1|ENSG00000251562.9	ENST00000508832.2;ENST00000534336.1;ENST00000616527.4;ENST00000619449.2	non_coding	230	212	105	22		308	280	104	21
chr11	65504107	65504110	canonical/G3L1-7	+	chr11:65504084-65504108:+	FALSE	5'- GGGAAGGGAGGGGGTGCCTGTGGGGTTTTAAAGA -3' rG4seq-K -----------------------***--------	MALAT1|ENSG00000251562.9	ENST00000534336.1;ENST00000612781.1;ENST00000616527.4;ENST00000618132.1;ENST00000619449.2;ENST00000620465.4	non_coding	1941	1017	484	55		2287	1205	354	31
chr11	65504286	65504289	bulges	+	chr11:65504261-65504287:+	FALSE	5'- GGAATTTGGAGGGATGGGAGGAGGGGGTGGGGCTTA -3' rG4seq-K -------------------------*-*--------	MALAT1|ENSG00000251562.9	ENST00000534336.1;ENST00000612781.1;ENST00000616527.4;ENST00000618132.1;ENST00000619449.2;ENST00000620465.4	non_coding	145	28	521	24		178	54	490	31
chr11	65504291	65504293	canonical/G3L1-7	+	chr11:65504271-65504293:+	FALSE	5'- GGGATGGGAGGAGGGGGTGGGGCTTACTTGTT -3' rG4seq-K --------------------**----------	MALAT1|ENSG00000251562.9	ENST00000534336.1;ENST00000612781.1;ENST00000616527.4;ENST00000618132.1;ENST00000619449.2;ENST00000620465.4	non_coding	1001	831	420	50		1333	1110	418	52
chr11	65505147	65505149	two-quartet	+	chr11:65505131-65505149:+	FALSE	5'- GGCGTGGGGGTGGAGGGGTGAGGTGGGC -3' rG4seq-K ----------------**----------	MALAT1|ENSG00000251562.9	ENST00000534336.1;ENST00000610851.1;ENST00000618227.1;ENST00000619449.2	non_coding	209	155	234	55		260	195	288	59
chr11	65505154	65505155	bulges	+	chr11:65505131-65505157:+	FALSE	5'- GGCGTGGGGGTGGAGGGGTGAGGTGGGCGCTAAGCC -3' rG4seq-K -----------------------*------------	MALAT1|ENSG00000251562.9	ENST00000534336.1;ENST00000610851.1;ENST00000618227.1;ENST00000619449.2	non_coding	290	86	154	4		368	105	187	4
chr11	65505157	65505159	bulges	+	chr11:65505131-65505160:+	FALSE	5'- GGCGTGGGGGTGGAGGGGTGAGGTGGGCGCTAAGCCTTT -3' rG4seq-K --------------------------**-----------	MALAT1|ENSG00000251562.9	ENST00000534336.1;ENST00000610851.1;ENST00000618227.1;ENST00000619449.2	non_coding	1339	601	318	12		1755	826	380	10
chr11	65505476	65505478	bulges	+	chr11:65505450-65505478:+	FALSE	5'- GCGGTGCTTGAAGGGGAGGGAAAGGGGGAAAGCGGGCA -3' rG4seq-K --------------------------**----------	MALAT1|ENSG00000251562.9	ENST00000534336.1;ENST00000610851.1;ENST00000616691.1;ENST00000617489.1;ENST00000618227.1;ENST00000619449.2	non_coding	480	424	380	16		543	476	288	25
chr11	65505485	65505487	canonical/G3L1-7	+	chr11:65505462-65505486:+	FALSE	5'- GGGGAGGGAAAGGGGGAAAGCGGGCAACCACTTT -3' rG4seq-K -----------------------**---------	MALAT1|ENSG00000251562.9	ENST00000534336.1;ENST00000610851.1;ENST00000616691.1;ENST00000617489.1;ENST00000618227.1;ENST00000619449.2	non_coding	1937	453	426	10		2181	512	312	6
chr11	65505917	65505920	bulges	+	chr11:65505894-65505919:+	FALSE	5'- GTGGCTGAGAGGGCTTTTGGGTGGGAATGCAAAAA -3' rG4seq-K -----------------------***---------	MALAT1|ENSG00000251562.9	ENST00000534336.1;ENST00000610851.1;ENST00000616691.1;ENST00000617489.1;ENST00000618227.1;ENST00000619449.2	non_coding	726	424	382	32		860	494	334	21
chr11	66626718	66626719	longloop	+	chr11:66626683-66626718:+	FALSE	5'- GGGCACCACAGGGAGGGAGGGAGAAAAGAGGTGGGTAGGGTTACA -3' rG4seq-K -----------------------------------*---------	RBM14-RBM4|ENSG00000248643.5;RBM14|ENSG00000239306.5	ENST00000310137.5;ENST00000393979.3;ENST00000412278.2;ENST00000421355.1;ENST00000500635.2;ENST00000511114.1	3UTR;non_coding	25	17	13	2		25	14	7	0
chr11	67586600	67586601	bulges	+	chr11:67586566-67586600:+	FALSE	5'- GGAAACAGTGAGGGTTGGGGGGACTCTGAGCGGGAGGCAGAGTT -3' rG4seq-K ----------------------------------*---------	GSTP1|ENSG00000084207.18	ENST00000398603.6;ENST00000398606.10;ENST00000467591.1;ENST00000494593.1;ENST00000498765.5	3UTR;CDS	60	16	63	2		57	16	60	4
chr11	69651232	69651233	bulges	+	chr11:69651207-69651234:+	FALSE	5'- GAGGAGGAGGAAGAGGAGGAGGAGGAGGTGGACCTGG -3' rG4seq-K -------------------------*-----------	CCND1|ENSG00000110092.4	ENST00000227507.3;ENST00000542367.1	CDS	45	36	31	3		59	53	24	1
chr11	69651235	69651236	bulges	+	chr11:69651207-69651238:+	FALSE	5'- GAGGAGGAGGAAGAGGAGGAGGAGGAGGTGGACCTGGCTTG -3' rG4seq-K ----------------------------*------------	CCND1|ENSG00000110092.4	ENST00000227507.3;ENST00000542367.1	CDS	80	34	33	1		105	42	27	3
chr11	69651238	69651239	bulges	+	chr11:69651207-69651238:+	FALSE	5'- GAGGAGGAGGAAGAGGAGGAGGAGGAGGTGGACCTGGCTTG -3' rG4seq-K -------------------------------*---------	CCND1|ENSG00000110092.4	ENST00000227507.3;ENST00000542367.1	CDS	150	69	39	6		177	71	29	2
chr11	69651552	69651553	two-quartet	+	chr11:69651537-69651552:+	FALSE	5'- GGTGGGGGAGGAGGGTTGTGCTACA -3' rG4seq-K ---------------*---------	CCND1|ENSG00000110092.4	ENST00000227507.3	3UTR	64	44	37	3		84	57	38	4
chr11	69652460	69652462	bulges	+	chr11:69652422-69652464:+	FALSE	5'- GTGGGCCACTGTGGTGGCAGTGGAGGTGGGGTGTTTGGGAGGCTGCGTGCCA -3' rG4seq-K --------------------------------------**------------	CCND1|ENSG00000110092.4	ENST00000227507.3	3UTR	104	39	37	3		122	45	41	2
chr11	69653177	69653178	bulges	+	chr11:69653144-69653180:+	FALSE	5'- GAGGGAGGACAGGCGGGAGGAGGTGTGAGGAGGAGGCTCCCGAGGG -3' rG4seq-K ---------------------------------*------------	CCND1|ENSG00000110092.4	ENST00000227507.3	3UTR	41	15	23	1		55	14	37	1
chr11	69653180	69653181	bulges	+	chr11:69653144-69653180:+	FALSE	5'- GAGGGAGGACAGGCGGGAGGAGGTGTGAGGAGGAGGCTCCCGAGGG -3' rG4seq-K ------------------------------------*---------	CCND1|ENSG00000110092.4	ENST00000227507.3	3UTR	71	26	35	4		81	22	40	2
chr11	70207053	70207055	longloop	+	chr11:70207024-70207054:+	FALSE	5'- GGGAGAGGCATGGCTGGGGTGGGGGTGGGGAGACCTGGTT -3' rG4seq-K -----------------------------**---------	FADD|ENSG00000168040.5	ENST00000301838.5	3UTR	58	26	19	1		72	30	16	2
chr11	102230710	102230711	bulges	+	chr11:102230683-102230710:+	FALSE	5'- GGGTCGGTGGGGGGGTTGGTTGGTTGGTTGGTTTTGT -3' rG4seq-K ---------------------------*---------	YAP1|ENSG00000137693.14	ENST00000282441.10;ENST00000345877.6;ENST00000537274.5;ENST00000615667.4	3UTR	16	8	9	0		21	10	8	0
chr11	125584476	125584477	two-quartet	+	chr11:125584457-125584476:+	FALSE	5'- GGTGGTGGGAGGCAGCGGGCAGAAATTTA -3' rG4seq-K -------------------*---------	EI24|ENSG00000149547.15	ENST00000278903.11	3UTR	16	14	11	0		20	17	9	1
chr11	130122387	130122388	bulges	+	chr11:130122356-130122387:+	FALSE	5'- GAGGATGATGAGGATGAGGAAGAAGGGGAGGAAGTGGTGGA -3' rG4seq-K -------------------------------*---------	APLP2|ENSG00000084234.18	ENST00000263574.9;ENST00000278756.7;ENST00000338167.10;ENST00000345598.9;ENST00000526330.5;ENST00000528499.5;ENST00000529701.1;ENST00000533616.5;ENST00000650012.1	3UTR;CDS	19	16	31	1		28	20	27	2
chr11	130140424	130140426	two-quartet	+	chr11:130135714-130135715:+,chr11:130140397-130140425:+	TRUE	5'- GGATCTGGAGTGGGAGAGCAGGATGGGGGACTGATCGGT -3' rG4seq-K ----------------------------**---------	APLP2|ENSG00000084234.18	ENST00000263574.9;ENST00000278756.7;ENST00000338167.10;ENST00000345598.9;ENST00000528499.5;ENST00000533616.5;ENST00000533860.5;ENST00000650012.1	3UTR;CDS	64	18	45	4		44	12	26	0
chr11	130209831	130209832	bulges	+	chr11:130209797-130209832:+	FALSE	5'- GGATCAAAGAGAACACTGGGGTATAGGGGCCGGGGCCACCCAAAT -3' rG4seq-K ----------------------------------*----------	ST14|ENSG00000149418.11	ENST00000278742.6	3UTR;CDS	26	10	36	1		25	10	34	0
chr11	130210030	130210031	two-quartet	+	chr11:130210006-130210030:+	FALSE	5'- GGAGCTGGGAGGTAGAAGGGGAGGACACTGGTGG -3' rG4seq-K ------------------------*---------	ST14|ENSG00000149418.11	ENST00000278742.6	3UTR	45	25	52	1		62	33	37	0
chr12	908861	908862	canonical/G3L1-7	+	chr12:908842-908861:+	FALSE	5'- GGGGGTGGGTGGGGGTGGGAAGTAGCCTA -3' rG4seq-K -------------------*---------	WNK1|ENSG00000060237.19	ENST00000315939.11;ENST00000340908.9;ENST00000530271.6;ENST00000535572.5;ENST00000537687.5;ENST00000540885.1;ENST00000675631.1	3UTR	56	46	11	5		46	35	12	4
chr12	1786618	1786619	canonical/G3L1-7	+	chr12:1786600-1786618:+	FALSE	5'- GGGGTAAGGGAGGGAGGGAGAATTTTTG -3' rG4seq-K ------------------*---------	ADIPOR2|ENSG00000006831.10	ENST00000357103.5	3UTR	59	56	17	2		63	61	14	2
chr12	6391507	6391508	two-quartet	+	chr12:6391481-6391510:+	FALSE	5'- GGTATGGGGAAGAGTTTTGGAAGGGGAGGAAAATGGCAA -3' rG4seq-K --------------------------*------------	LTBR|ENSG00000111321.11	ENST00000228918.9;ENST00000441074.3	3UTR	15	11	10	0		22	16	9	1
chr12	6536981	6536982	potential G-quadruplex & G>=40%	+	chr12:6536922-6536982:+	FALSE	5'- AGATCCCTCCAAAATCAAGTGGGGCGATGCTGGCGCTGAGTACGTCGTGGAGTCCACTGGCGTCTTCACC -3' rG4seq-K -----------------------------------------------------------*----------	GAPDH|ENSG00000111640.15	ENST00000229239.10;ENST00000396856.5;ENST00000396858.5;ENST00000396859.5;ENST00000396861.5;ENST00000466525.1;ENST00000466588.5;ENST00000474249.5;ENST00000492719.5;ENST00000619601.1	CDS	66	18	132	13		89	37	88	4
chr12	6537653	6537654	two-quartet	+	chr12:6537625-6537654:+	FALSE	5'- GGCCCCTCCGGGAAACTGTGGCGTGATGGCCGCGGGGCT -3' rG4seq-K ----------------------------*----------	GAPDH|ENSG00000111640.15	ENST00000229239.10;ENST00000396856.5;ENST00000396858.5;ENST00000396859.5;ENST00000396861.5;ENST00000466525.1;ENST00000466588.5;ENST00000474249.5;ENST00000492719.5;ENST00000619601.1	CDS	149	34	182	14		203	60	172	16
chr12	6769942	6769943	bulges	+	chr12:6769665-6769674:+,chr12:6769920-6769942:+	TRUE	5'- GTGGTGGAGGAGGAGGAGAACGGGGCTGAGGAGGAAGAAGA -3' rG4seq-K -------------------------------*---------	PTMS|ENSG00000159335.18	ENST00000309083.8;ENST00000389462.8;ENST00000538057.2;ENST00000540667.5	CDS	42	24	36	6		46	21	30	4
chr12	6769945	6769946	two-quartet	+	chr12:6769919-6769945:+	FALSE	5'- GGAGGAGGAGAACGGGGCTGAGGAGGAAGAAGAAGA -3' rG4seq-K --------------------------*---------	PTMS|ENSG00000159335.18	ENST00000309083.8;ENST00000389462.8;ENST00000538057.2;ENST00000540667.5	CDS	91	48	47	10		109	60	32	3
chr12	6770498	6770501	bulges	+	chr12:6770478-6770501:+	FALSE	5'- GGGCCTGGAGGTGGGGGTGGGGGCAGCCAAGTC -3' rG4seq-K --------------------***----------	PTMS|ENSG00000159335.18	ENST00000309083.8;ENST00000389462.8;ENST00000538057.2;ENST00000540667.5	3UTR	235	101	118	5		375	149	106	3
chr12	6941993	6941994	two-quartet	+	chr12:6941960-6941994:+	FALSE	5'- GGTGTGCAGAGGTGGGGAGGTGGCGAGGATGGGGACAGAAAGCG -3' rG4seq-K ---------------------------------*----------	ATN1|ENSG00000111676.15	ENST00000356654.8;ENST00000396684.3;ENST00000537488.1	3UTR	12	8	6	0		20	16	7	2
chr12	12914272	12914273	bulges	+	chr12:12914247-12914274:+	FALSE	5'- GAGGCAGAGGCGAGGGAGGTGGAGGTGAGTGGATGAT -3' rG4seq-K -------------------------*-----------	GPRC5A|ENSG00000013588.9	ENST00000014914.6	3UTR	9	5	15	0		19	8	16	0
chr12	12914279	12914280	bulges	+	chr12:12914247-12914279:+	FALSE	5'- GAGGCAGAGGCGAGGGAGGTGGAGGTGAGTGGATGATGTGCT -3' rG4seq-K --------------------------------*---------	GPRC5A|ENSG00000013588.9	ENST00000014914.6	3UTR	30	17	15	0		36	17	14	0
chr12	12915239	12915241	bulges	+	chr12:12915210-12915242:+	FALSE	5'- GTGGTTTGAGGGAGGATAGAGAGGACAGGGTGTCAAGAACAG -3' rG4seq-K -----------------------------**-----------	GPRC5A|ENSG00000013588.9	ENST00000014914.6	3UTR	28	14	29	2		31	17	28	0
chr12	52070076	52070077	bulges	+	chr12:52070051-52070078:+	FALSE	5'- GTGGACTGTGGTTGGGGGAGGTGGGAGCTGTTTTAAC -3' rG4seq-K -------------------------*-----------	ATG101|ENSG00000123395.15	ENST00000336854.9;ENST00000547409.1;ENST00000548915.1;ENST00000550604.1;ENST00000552544.5;ENST00000552947.1;ENST00000553049.5	5UTR	17	14	7	1		10	9	7	0
chr12	52949355	52949357	two-quartet	+	chr12:52949336-52949358:+	FALSE	5'- GGGGCGGCATGGGGTCCGGGGGCCTGGCCACC -3' rG4seq-K -------------------**-----------	KRT18|ENSG00000111057.11	ENST00000388835.4;ENST00000388837.6;ENST00000549078.5;ENST00000550600.5	CDS	189	47	314	7		176	53	283	8
chr12	54283833	54283834	bulges	+	chr12:54282643-54282665:+,chr12:54283826-54283833:+	TRUE	5'- GGAGGAAACTTCAGTGGTCGTGGTGGTGGAAGCTACAAT -3' rG4seq-K -----------------------------*---------	ENSG00000258344|ENSG00000258344.1;HNRNPA1|ENSG00000135486.19	ENST00000330752.12;ENST00000340913.11;ENST00000546500.5;ENST00000547276.5;ENST00000547566.5;ENST00000547708.5;ENST00000550482.2;ENST00000551679.1;ENST00000553061.1;ENST00000676472.1;ENST00000676572.1;ENST00000676707.1;ENST00000676725.1;ENST00000676794.1;ENST00000676853.1;ENST00000676886.1;ENST00000676951.1;ENST00000677191.1;ENST00000677210.1;ENST00000677220.1;ENST00000677224.1;ENST00000677249.1;E…	3UTR;5UTR;CDS;non_coding	35	16	51	8		39	28	30	8
chr12	54350994	54350995	canonical/G3L1-7	+	chr12:54350974-54350994:+	FALSE	5'- GGGGGCGGGGATGGGTAGGGATTTATCCAA -3' rG4seq-K --------------------*---------	COPZ1|ENSG00000111481.10	ENST00000262061.7;ENST00000549043.5;ENST00000550171.5	3UTR	54	47	9	3		69	63	8	3
chr12	57511730	57511731	bulges	+	chr12:57511699-57511730:+	FALSE	5'- GGAGAAGCGACTGGAGGAGTGGTTGGGGAGGACATTGCCTG -3' rG4seq-K -------------------------------*---------	MARS1|ENSG00000166986.15	ENST00000262027.10;ENST00000447721.6;ENST00000537638.6;ENST00000545888.6;ENST00000546971.5;ENST00000548944.1;ENST00000549603.1;ENST00000628866.2	3UTR;CDS	19	14	12	3		31	28	6	1
chr12	57720885	57720887	longloop	+	chr12:57720856-57720886:+	FALSE	5'- GGGGCTCTCCAGGTGGGGAGGGCACAGGGGACCTGGACGA -3' rG4seq-K -----------------------------**---------	OS9|ENSG00000135506.16	ENST00000257966.12;ENST00000315970.12;ENST00000389142.9;ENST00000389146.10;ENST00000413095.6;ENST00000435406.6;ENST00000439210.6;ENST00000546916.1;ENST00000549307.5;ENST00000551035.5;ENST00000552285.5	CDS	48	27	44	2		68	33	32	2
chr12	103930466	103930467	two-quartet	+	chr12:103930452-103930466:+	FALSE	5'- GGGGTGGGGGGTGGAGGCGGCTCC -3' rG4seq-K --------------*---------	HSP90B1|ENSG00000166598.16;MIR3652|ENSG00000284503.1	ENST00000299767.10;ENST00000540297.7;ENST00000548462.5;ENST00000548622.1;ENST00000549334.5;ENST00000550595.2;ENST00000579335.1;ENST00000614327.2;ENST00000640977.2;ENST00000679377.1;ENST00000679538.1;ENST00000679779.1;ENST00000680242.1;ENST00000680281.1;ENST00000680370.1;ENST00000680391.1;ENST00000680653.1;ENST00000680663.1;ENST00000680762.1;ENST00000680899.1;ENST00000680989.1;ENST00000681172.1;EN…	5UTR;non_coding	171	59	163	6		235	59	147	1
chr12	103930469	103930470	two-quartet	+	chr12:103930452-103930472:+	FALSE	5'- GGGGTGGGGGGTGGAGGCGGCTCCTGCGAT -3' rG4seq-K -----------------*------------	HSP90B1|ENSG00000166598.16;MIR3652|ENSG00000284503.1	ENST00000299767.10;ENST00000540297.7;ENST00000548462.5;ENST00000548622.1;ENST00000549334.5;ENST00000550595.2;ENST00000579335.1;ENST00000614327.2;ENST00000640977.2;ENST00000679377.1;ENST00000679538.1;ENST00000679779.1;ENST00000680242.1;ENST00000680281.1;ENST00000680370.1;ENST00000680391.1;ENST00000680653.1;ENST00000680663.1;ENST00000680762.1;ENST00000680899.1;ENST00000680989.1;ENST00000681172.1;EN…	5UTR;non_coding	218	34	171	3		301	58	151	4
chr12	103930472	103930473	two-quartet	+	chr12:103930452-103930472:+	FALSE	5'- GGGGTGGGGGGTGGAGGCGGCTCCTGCGAT -3' rG4seq-K --------------------*---------	HSP90B1|ENSG00000166598.16;MIR3652|ENSG00000284503.1	ENST00000299767.10;ENST00000540297.7;ENST00000548462.5;ENST00000548622.1;ENST00000549334.5;ENST00000550595.2;ENST00000579335.1;ENST00000614327.2;ENST00000640977.2;ENST00000679377.1;ENST00000679538.1;ENST00000679779.1;ENST00000680242.1;ENST00000680281.1;ENST00000680370.1;ENST00000680391.1;ENST00000680653.1;ENST00000680663.1;ENST00000680762.1;ENST00000680899.1;ENST00000680989.1;ENST00000681172.1;EN…	5UTR;non_coding	283	45	181	3		390	63	164	5
chr12	103930489	103930491	bulges	+	chr12:103930452-103930490:+	FALSE	5'- GGGGTGGGGGGTGGAGGCGGCTCCTGCGATCGAAGGGGACTTGAGACT -3' rG4seq-K -------------------------------------**---------	HSP90B1|ENSG00000166598.16;MIR3652|ENSG00000284503.1	ENST00000299767.10;ENST00000540297.7;ENST00000548462.5;ENST00000548622.1;ENST00000549334.5;ENST00000550595.2;ENST00000579335.1;ENST00000614327.2;ENST00000640977.2;ENST00000679377.1;ENST00000679538.1;ENST00000679779.1;ENST00000680242.1;ENST00000680281.1;ENST00000680370.1;ENST00000680391.1;ENST00000680653.1;ENST00000680663.1;ENST00000680762.1;ENST00000680899.1;ENST00000680989.1;ENST00000681172.1;EN…	5UTR;non_coding	547	101	281	14		665	152	235	7
chr12	110281629	110281630	longloop	+	chr12:110281598-110281629:+	FALSE	5'- GGGGCGGTTGTCTGGGGGAGGGGGCGCGGGGTGATTCAGCG -3' rG4seq-K -------------------------------*---------	ATP2A2|ENSG00000174437.18	ENST00000308664.10;ENST00000377685.9;ENST00000539276.7;ENST00000552636.2	5UTR	51	17	25	1		70	32	17	1
chr12	112022697	112022698	canonical/G3L1-7	+	chr12:112022674-112022698:+	FALSE	5'- GGGTTTGGTGGGGGTAGGGAGGGGAGAGTTAACC -3' rG4seq-K -----------------------*----------	ERP29|ENSG00000089248.7	ENST00000261735.4;ENST00000455836.1;ENST00000546477.1	3UTR	22	15	6	0		25	19	6	0
chr12	120576810	120576811	potential G-quadruplex & G>=40%	+	chr12:120576751-120576811:+	FALSE	5'- TAAGTATTTGAGTTTGAACAGATTAGCTCTGGGGGGAGGGGGTTTCCACAATGTGAGGGGGAACCAAGAA -3' rG4seq-K -----------------------------------------------------------*----------	RNF10|ENSG00000022840.17	ENST00000325954.9;ENST00000413266.6;ENST00000535470.5;ENST00000538254.1;ENST00000542701.1;ENST00000544805.1;ENST00000545419.5	3UTR	13	8	22	0		23	7	17	0
chr12	120696583	120696585	two-quartet	+	chr12:120696567-120696584:+	FALSE	5'- GGGTGGAGGGGTGTGGGAAAGAAACCA -3' rG4seq-K ----------------**---------	MLEC|ENSG00000110917.8	ENST00000228506.8;ENST00000412616.2;ENST00000535413.1;ENST00000535656.1	3UTR	64	40	20	2		88	58	17	1
chr12	124014192	124014194	canonical/G3L1-7	+	chr12:124014174-124014194:+	FALSE	5'- GGGGTGGGGTGGGGGTGGGGTGACATTAGC -3' rG4seq-K ------------------**----------	ENSG00000274874|ENSG00000274874.2;RFLNA|ENSG00000178882.15;ZNF664|ENSG00000179195.16	ENST00000337815.9;ENST00000389727.8;ENST00000392404.7;ENST00000538932.6;ENST00000539644.5;ENST00000545615.1;ENST00000618862.2	3UTR;non_coding	115	63	47	6		123	86	32	6
chr12	124014843	124014844	longloop	+	chr12:124014810-124014845:+	FALSE	5'- GGGTGGGCCATGAAACTAGAGATGGGATTTGGGGGTGAATTTGTC -3' rG4seq-K ---------------------------------*-----------	ENSG00000274874|ENSG00000274874.2;RFLNA|ENSG00000178882.15;ZNF664|ENSG00000179195.16	ENST00000337815.9;ENST00000389727.8;ENST00000392404.7;ENST00000538932.6;ENST00000539644.5;ENST00000545615.1;ENST00000618862.2	3UTR;non_coding	34	25	13	1		57	52	6	1
chr13	25301850	25301851	two-quartet	+	chr13:25301823-25301850:+	FALSE	5'- GGCCGCCGGCGGGACCAGCACAGGCGGCGTTTTCTCC -3' rG4seq-K ---------------------------*---------	NUP58|ENSG00000139496.16	ENST00000381718.7;ENST00000381736.8;ENST00000381747.7;ENST00000460326.5;ENST00000463407.5;ENST00000465068.5;ENST00000466694.5;ENST00000480187.5;ENST00000481980.1;ENST00000490231.5;ENST00000495460.1	CDS	44	38	23	13		72	63	18	10
chr13	73076177	73076179	canonical/G3L1-7	+	chr13:73076155-73076179:+	FALSE	5'- GGGTAAGGGGTGGGGGTGGAGGGGAGTGTGTGCA -3' rG4seq-K ----------------------**----------	KLF5|ENSG00000102554.14	ENST00000377687.6;ENST00000539231.5	3UTR	267	211	68	5		241	203	86	3
chr13	113322877	113322878	potential G-quadruplex & G>=40%	+	chr13:113322818-113322878:+	FALSE	5'- AGGGGGTGGGGGTGCTGCTCTCTCCGAGGGGTGGAATGCCGCTGTCTCTGAGGGGTGGGGGTGCCGCTCT -3' rG4seq-K -----------------------------------------------------------*----------	LAMP1|ENSG00000185896.11	ENST00000332556.5;ENST00000472564.1	3UTR	24	12	8	0		19	13	7	1
chr14	20455687	20455688	bulges	+	chr14:20455657-20455688:+	FALSE	5'- GGGAAAAAGGGAGCGGTGGCGGAAGACGGGGATGAGCTCAG -3' rG4seq-K ------------------------------*----------	APEX1|ENSG00000100823.12	ENST00000216714.8;ENST00000398030.8;ENST00000553368.1;ENST00000553555.5;ENST00000553681.5;ENST00000554325.1;ENST00000554813.5;ENST00000555306.5;ENST00000555414.5;ENST00000555839.5;ENST00000556054.5;ENST00000556296.1;ENST00000557054.1;ENST00000557150.5;ENST00000557159.5;ENST00000557181.5;ENST00000557344.5;ENST00000557365.1;ENST00000557592.5	5UTR;CDS	19	10	13	1		11	7	6	0
chr14	49894418	49894419	bulges	+	chr14:49894395-49894420:+	FALSE	5'- GTTTGGCGGGGACGGGGCTTGGGGGTTTTCTCTTT -3' rG4seq-K -----------------------*-----------	ARF6|ENSG00000165527.8	ENST00000298316.7;ENST00000692608.1;ENST00000693319.1	3UTR	28	14	14	1		23	14	20	0
chr14	69771591	69771593	longloop	+	chr14:69771564-69771592:+	FALSE	5'- GGGGGTGGGATTTGGAAGGGGGGTTGGGTTGGGCTGGA -3' rG4seq-K ---------------------------**---------	SRSF5|ENSG00000100650.16	ENST00000394366.6;ENST00000553521.5;ENST00000553635.5;ENST00000554465.5;ENST00000554929.1;ENST00000555547.5;ENST00000556184.5;ENST00000556587.5;ENST00000556647.1;ENST00000557154.6	3UTR	71	38	53	2		111	69	53	2
chr14	69771597	69771598	longloop	+	chr14:69771566-69771597:+	FALSE	5'- GGGTGGGATTTGGAAGGGGGGTTGGGTTGGGCTGGATATCT -3' rG4seq-K -------------------------------*---------	SRSF5|ENSG00000100650.16	ENST00000394366.6;ENST00000553521.5;ENST00000553635.5;ENST00000554465.5;ENST00000554929.1;ENST00000555547.5;ENST00000556184.5;ENST00000556587.5;ENST00000556647.1;ENST00000557154.6	3UTR	96	33	29	0		149	44	30	1
chr14	74902955	74902956	longloop	+	chr14:74902923-74902955:+	FALSE	5'- GGGGATCTGGGTGTGTGAGTGGGAGGAGAGGGCAGAGGTCCC -3' rG4seq-K --------------------------------*---------	DLST|ENSG00000119689.15	ENST00000334220.9	3UTR	43	35	10	0		53	41	12	1
chr14	75470381	75470383	canonical/G3L1-7	+	chr14:75470358-75470382:+	FALSE	5'- GGGGTGGCCAGGGCGGGGGCGGGGTGCATTTCCA -3' rG4seq-K -----------------------**---------	JDP2|ENSG00000140044.13	ENST00000267569.5;ENST00000435893.6;ENST00000437176.5;ENST00000651602.1	3UTR	53	22	20	0		55	18	14	0
chr14	77469421	77469422	potential G-quadruplex & G>=40%	+	chr14:77469362-77469422:+	FALSE	5'- CCTCCCTTCCACATATACCTTGGGTTTGTGCATGTTTTCTGCTGGGTGGGTTCAGAGGGCAATTTCTCTT -3' rG4seq-K -----------------------------------------------------------*----------	AHSA1|ENSG00000100591.8	ENST00000216479.8;ENST00000555457.5;ENST00000555729.3;ENST00000556369.1;ENST00000557476.2	3UTR	28	23	19	1		49	42	7	1
chr14	90406649	90406650	bulges	+	chr14:90406623-90406652:+	FALSE	5'- GAGGGGTGGGTCAGAGCAGTGGAGGGGAGACATCGCCCA -3' rG4seq-K --------------------------*------------	CALM1|ENSG00000198668.14	ENST00000356978.9	3UTR	25	21	6	1		34	30	7	2
chr14	96502560	96502562	bulges	+	chr14:96502532-96502561:+	FALSE	5'- GGGCGGCAGCGGCGGCGGTTGCGGGGGGGAAGTGACTGG -3' rG4seq-K ----------------------------**---------	PAPOLA|ENSG00000090060.19	ENST00000216277.13;ENST00000392990.6;ENST00000553357.5;ENST00000553689.5;ENST00000554130.5;ENST00000554887.5;ENST00000556619.5;ENST00000557320.5;ENST00000557471.5;ENST00000618976.2	5UTR	31	17	29	2		39	28	32	8
chr14	96502575	96502576	bulges	+	chr14:96502554-96502577:+	FALSE	5'- GGGGGGGAAGTGACTGGGCGGTGCCGGCGCCGG -3' rG4seq-K ---------------------*-----------	PAPOLA|ENSG00000090060.19	ENST00000216277.13;ENST00000392990.6;ENST00000553357.5;ENST00000553689.5;ENST00000554130.5;ENST00000554887.5;ENST00000556619.5;ENST00000557320.5;ENST00000557471.5;ENST00000618976.2	5UTR	40	11	22	0		65	20	22	0
chr14	104895942	104895943	canonical/G3L1-7	+	chr14:104895921-104895942:+	FALSE	5'- GGGCATGGGGGCAGGGACGGGCCCAGGAACT -3' rG4seq-K ---------------------*---------	CEP170B|ENSG00000099814.17	ENST00000414716.8;ENST00000556508.5	3UTR	23	15	8	0		18	10	10	0
chr15	38484637	38484638	bulges	+	chr15:38484599-38484639:+	FALSE	5'- GGAGGAGGTGGTGGTGGTGGTGGTGGTGGTGGTGGAGGAGGTGGATATAG -3' rG4seq-K --------------------------------------*-----------	FAM98B|ENSG00000171262.11	ENST00000397609.6;ENST00000559431.1	CDS	16	8	14	1		26	16	9	1
chr15	43771480	43771483	longloop	+	chr15:43771446-43771480:+	FALSE	5'- GGGGGAAATGTTGTGGGGGTGGGGTTGAGTTGGGGGTATTTTCT -3' rG4seq-K ----------------------------------***-------	PDIA3|ENSG00000167004.14	ENST00000300289.10;ENST00000434494.5;ENST00000497349.2;ENST00000684793.1;ENST00000685864.1;ENST00000686175.1;ENST00000686227.1;ENST00000686314.1;ENST00000686402.1;ENST00000687167.1;ENST00000687211.1;ENST00000687794.1;ENST00000688652.1;ENST00000688851.1;ENST00000689152.1;ENST00000691274.1;ENST00000691893.1;ENST00000692484.1;ENST00000693281.1	3UTR	260	155	76	15		320	200	65	9
chr15	69455255	69455256	potential G-quadruplex & G>=40%	+	chr15:69455196-69455256:+	FALSE	5'- CTCATCTGCAATGTAGGGGCCGGTGGACCTGCTCCAGCAGCTGGTGCTGCACCAGCAGGAGGTCCTGCCC -3' rG4seq-K -----------------------------------------------------------*----------	RPLP1|ENSG00000137818.12	ENST00000260379.11;ENST00000357790.5;ENST00000487304.6;ENST00000488122.2;ENST00000560274.1	CDS	68	22	113	12		84	27	88	11
chr15	85748666	85748667	canonical/G3L1-7	+	chr15:85748644-85748666:+	FALSE	5'- GGGAGGCGGGGGGGAGGAAGGGAAAATAAAGG -3' rG4seq-K ----------------------*---------	AKAP13|ENSG00000170776.22	ENST00000394510.6;ENST00000394518.7;ENST00000560185.1	3UTR	27	15	12	1		34	20	8	1
chr15	88626585	88626586	canonical/G3L1-7	+	chr15:88626562-88626585:+	FALSE	5'- GGGCACGGGACCCCGAGGGCGGGTAAGCGAGCT -3' rG4seq-K -----------------------*---------	AEN|ENSG00000181026.15	ENST00000332810.4;ENST00000557787.1;ENST00000558327.1;ENST00000559528.1	CDS	14	7	12	0		16	11	9	1
chr15	93025239	93025241	bulges	+	chr15:93025201-93025240:+	FALSE	5'- GGGGCAAGCGGGTGGGGACAAGCATAGGACTTGAAGGGGAGCAGGTACA -3' rG4seq-K --------------------------------------**---------	CHD2|ENSG00000173575.22	ENST00000394196.9;ENST00000625662.2	3UTR	41	17	14	0		24	12	15	1
chr16	682698	682699	bulges	+	chr16:682672-682698:+	FALSE	5'- GGAAAAGCAGGTGAGGGTGGGCTGGGCTGAGGCCAT -3' rG4seq-K --------------------------*---------	STUB1|ENSG00000103266.11	ENST00000219548.9;ENST00000564316.1;ENST00000565677.5;ENST00000565813.1;ENST00000569248.5	3UTR	43	32	9	1		56	48	9	1
chr16	1324913	1324915	canonical/G3L1-7	+	chr16:1324898-1324914:+	FALSE	5'- GGGGGGGTTGGGCGGGCGCCATCTTC -3' rG4seq-K ---------------**---------	UBE2I|ENSG00000103275.21	ENST00000325437.9;ENST00000355803.8;ENST00000397514.8;ENST00000397515.6;ENST00000403747.6;ENST00000406620.6;ENST00000562470.3;ENST00000566587.5;ENST00000567074.6;ENST00000567383.6;ENST00000677314.1;ENST00000677987.1;ENST00000679137.1	3UTR	89	73	16	3		101	78	14	0
chr16	1699281	1699283	canonical/G3L1-7	+	chr16:1699258-1699283:+	FALSE	5'- GGGGGGTGAGGGTGGGGAGGTGGGGCAGGGCATGG -3' rG4seq-K -----------------------**----------	JPT2|ENSG00000206053.13	ENST00000248098.8;ENST00000382710.8;ENST00000561516.5;ENST00000562569.1;ENST00000562684.5;ENST00000566742.5;ENST00000569256.5;ENST00000569765.5	3UTR	41	23	31	1		68	33	33	1
chr16	1699287	1699289	canonical/G3L1-7	+	chr16:1699261-1699288:+	FALSE	5'- GGGTGAGGGTGGGGAGGTGGGGCAGGGCATGGTCCTT -3' rG4seq-K --------------------------**---------	JPT2|ENSG00000206053.13	ENST00000248098.8;ENST00000382710.8;ENST00000561516.5;ENST00000562569.1;ENST00000562684.5;ENST00000566742.5;ENST00000569256.5;ENST00000569765.5	3UTR	96	24	34	0		170	51	39	1
chr16	2707566	2707568	longloop	+	chr16:2707542-2707567:+	FALSE	5'- GGGTGGGCGCTGCCTCTTGGGGGGGCCTCGCTCTG -3' rG4seq-K ------------------------**---------	KCTD5|ENSG00000167977.9	ENST00000301738.9	3UTR	50	26	16	0		59	29	19	3
chr16	2771121	2771124	longloop	+	chr16:2771094-2771123:+	FALSE	5'- GGGAATGCAGATGGGAGTTGGGGGAGGGGAGGATACAGT -3' rG4seq-K ---------------------------***---------	SRRM2|ENSG00000167978.17	ENST00000301740.13;ENST00000570539.1;ENST00000573692.1;ENST00000574331.5;ENST00000630499.2	3UTR	128	48	119	4		124	45	83	6
chr16	3020955	3020956	bulges	+	chr16:3020937-3020956:+	FALSE	5'- GCGGGGGGAGGGACTGGGGTCGGGCCCGG -3' rG4seq-K ------------------*----------	TNFRSF12A|ENSG00000006327.14	ENST00000326577.9;ENST00000341627.5;ENST00000571351.1;ENST00000573001.5;ENST00000574699.1;ENST00000575124.1;ENST00000575836.1	non_coding	9	8	6	0		11	10	6	0
chr16	3021987	3021988	bulges	+	chr16:3021963-3021988:+	FALSE	5'- GAGGCCTGGGCCCAGGGTTCAGGGGAACCTTCCAA -3' rG4seq-K ------------------------*----------	TNFRSF12A|ENSG00000006327.14	ENST00000326577.9;ENST00000341627.5;ENST00000571351.1;ENST00000573001.5;ENST00000575124.1	3UTR	50	12	57	1		78	18	44	0
chr16	3022273	3022274	two-quartet	+	chr16:3022247-3022273:+	FALSE	5'- GGGGGCTGGCCCACTAGGAGGGCTGGCCCTAAGATA -3' rG4seq-K --------------------------*---------	TNFRSF12A|ENSG00000006327.14	ENST00000326577.9;ENST00000341627.5;ENST00000571351.1;ENST00000575124.1	3UTR	54	23	56	7		56	23	50	4
chr16	3022348	3022350	bulges	+	chr16:3022327-3022349:+	FALSE	5'- GGGGAGAGTTTGGAGGGGAGGGAGAATTTATT -3' rG4seq-K ---------------------**---------	TNFRSF12A|ENSG00000006327.14	ENST00000326577.9;ENST00000341627.5;ENST00000571351.1;ENST00000575124.1	3UTR	180	90	191	18		214	112	117	12
chr16	8847846	8847847	canonical/G3L1-7	+	chr16:8847828-8847847:+	FALSE	5'- GGGAGCGGGAGGGGCGGGGTCCCGGCTGA -3' rG4seq-K ------------------*----------	PMM2|ENSG00000140650.13	ENST00000268261.9;ENST00000562025.1;ENST00000562318.5;ENST00000565221.5;ENST00000566540.5;ENST00000566604.5;ENST00000566983.5;ENST00000567697.2;ENST00000569958.5;ENST00000570076.5;ENST00000682393.1;ENST00000683094.1;ENST00000683274.1;ENST00000683435.1	3UTR	57	51	9	1		65	58	6	0
chr16	28826945	28826947	potential G-quadruplex & G>=40%	+	chr16:28826887-28826947:+	FALSE	5'- ATGAACTCGAAAGTGAATGGGGAACACAAAGAGAAGGTGCTTCAGCGCTGGGAGGGGGGTGACAGCAACA -3' rG4seq-K ----------------------------------------------------------**----------	ATXN2L|ENSG00000168488.19	ENST00000325215.10;ENST00000336783.9;ENST00000340394.12;ENST00000382686.8;ENST00000395547.6;ENST00000563314.5;ENST00000564304.5;ENST00000565971.5;ENST00000568266.5;ENST00000570200.5	CDS	27	12	21	2		25	13	25	5
chr16	29810703	29810707	bulges	+	chr16:29810679-29810706:+	FALSE	5'- GGGGGAGGGAGGAGAGGAAGGAGGGGGATCAGAGCTG -3' rG4seq-K ------------------------****---------	ENSG00000280607|ENSG00000280607.1;MAZ|ENSG00000103495.15	ENST00000219782.10;ENST00000322945.11;ENST00000545521.5;ENST00000562337.5;ENST00000562594.2;ENST00000563402.1;ENST00000565777.1;ENST00000566906.6;ENST00000568282.1;ENST00000568411.5;ENST00000568544.5	3UTR;non_coding	146	79	75	4		193	100	65	5
chr16	30068655	30068657	bulges	+	chr16:30067639-30067661:+,chr16:30068645-30068656:+	TRUE	5'- GGGCGGTGTTGTGGGCATCAAGGTAGACAAGGGCGTGGTCCCC -3' rG4seq-K --------------------------------**---------	ALDOA|ENSG00000149925.22;ENSG00000285043|ENSG00000285043.3	ENST00000338110.11;ENST00000395240.7;ENST00000395248.6;ENST00000412304.6;ENST00000562168.5;ENST00000562679.5;ENST00000563060.6;ENST00000563987.5;ENST00000564521.6;ENST00000564688.1;ENST00000566012.1;ENST00000566846.5;ENST00000566897.6;ENST00000569545.5;ENST00000569798.5;ENST00000642816.3;ENST00000643777.4	3UTR;CDS	44	10	67	2		54	14	76	3
chr16	30659924	30659925	bulges	+	chr16:30659887-30659924:+	FALSE	5'- GAGGAGGAGCCTGAGGAGGAGGAAGAGGAGGAGGAGGACTTGATCGA -3' rG4seq-K -------------------------------------*---------	FBRS|ENSG00000156860.16	ENST00000356166.11;ENST00000498588.1;ENST00000543786.5	CDS	39	36	8	3		58	46	7	0
chr16	30737140	30737143	bulges	+	chr16:30737114-30737142:+	FALSE	5'- GAGGAGGAGGAGGGGCCGGGGGCTGGGGATGAGAGTTC -3' rG4seq-K --------------------------***---------	ENSG00000282034|ENSG00000282034.1;SRCAP|ENSG00000080603.17	ENST00000262518.9;ENST00000380361.7;ENST00000395059.6	CDS	27	14	38	2		39	18	21	0
chr16	31184391	31184392	bulges	+	chr16:31184366-31184393:+	FALSE	5'- GTGGTGGTGGAGGTGGAGGTGGAGGTGGAGGTAACTA -3' rG4seq-K -------------------------*-----------	FUS|ENSG00000089280.19	ENST00000254108.12;ENST00000380244.7;ENST00000487509.6;ENST00000487974.1;ENST00000566605.5;ENST00000568685.1	CDS	36	29	32	3		48	40	21	3
chr16	31184938	31184940	bulges	+	chr16:31184366-31184396:+,chr16:31184938-31184939:+	TRUE	5'- GTGGTGGTGGAGGTGGAGGTGGAGGTGGAGGTAACTATGGC -3' rG4seq-K ------------------------------**---------	FUS|ENSG00000089280.19	ENST00000254108.12;ENST00000380244.7;ENST00000487509.6;ENST00000487974.1;ENST00000566605.5;ENST00000568685.1	CDS	403	94	83	2		483	102	70	6
chr16	31185101	31185102	bulges	+	chr16:31185069-31185103:+	FALSE	5'- GGTGGCAGTGGTGGCGGCGGCGGCGGCGGCGGTGGTGGTTACAA -3' rG4seq-K --------------------------------*-----------	FUS|ENSG00000089280.19	ENST00000254108.12;ENST00000380244.7;ENST00000487509.6;ENST00000566605.5;ENST00000568685.1;ENST00000570090.1	CDS	45	15	25	1		64	16	42	1
chr16	31185107	31185108	bulges	+	chr16:31185069-31185107:+	FALSE	5'- GGTGGCAGTGGTGGCGGCGGCGGCGGCGGCGGTGGTGGTTACAACCGC -3' rG4seq-K --------------------------------------*---------	FUS|ENSG00000089280.19	ENST00000254108.12;ENST00000380244.7;ENST00000487509.6;ENST00000566605.5;ENST00000568685.1;ENST00000570090.1	CDS	141	57	28	1		174	70	46	2
chr16	31185172	31185174	bulges	+	chr16:31185139-31185173:+	FALSE	5'- GAGGTCGTGGAGGTGGCCGTGGAGGCAGAGGTGGCATGGGGTAG -3' rG4seq-K ---------------------------------**---------	FUS|ENSG00000089280.19	ENST00000254108.12;ENST00000380244.7;ENST00000487509.6;ENST00000566605.5;ENST00000568685.1;ENST00000570090.1	CDS	38	16	24	1		49	23	34	1
chr16	31190317	31190318	bulges	+	chr16:31190286-31190319:+	FALSE	5'- GTGGAGGCTATGGAGGTGGTGGCAGTGGTGGTGGTGGCCGAGG -3' rG4seq-K -------------------------------*-----------	FUS|ENSG00000089280.19	ENST00000254108.12;ENST00000380244.7;ENST00000474990.5;ENST00000487509.6;ENST00000566605.5;ENST00000568685.1;ENST00000569760.5	3UTR;CDS	15	8	25	0		27	14	18	0
chr16	31190320	31190321	bulges	+	chr16:31190286-31190323:+	FALSE	5'- GTGGAGGCTATGGAGGTGGTGGCAGTGGTGGTGGTGGCCGAGGAGGA -3' rG4seq-K ----------------------------------*------------	FUS|ENSG00000089280.19	ENST00000254108.12;ENST00000380244.7;ENST00000474990.5;ENST00000487509.6;ENST00000566605.5;ENST00000568685.1;ENST00000569760.5	3UTR;CDS	31	12	25	0		49	21	17	0
chr16	31190323	31190324	bulges	+	chr16:31190286-31190323:+	FALSE	5'- GTGGAGGCTATGGAGGTGGTGGCAGTGGTGGTGGTGGCCGAGGAGGA -3' rG4seq-K -------------------------------------*---------	FUS|ENSG00000089280.19	ENST00000254108.12;ENST00000380244.7;ENST00000474990.5;ENST00000487509.6;ENST00000566605.5;ENST00000568685.1;ENST00000569760.5	3UTR;CDS	68	33	23	2		90	37	18	1
chr16	31190359	31190360	bulges	+	chr16:31190327-31190362:+	FALSE	5'- GGAGGATTTCCCAGTGGAGGTGGTGGCGGTGGAGGACAGCAGCGA -3' rG4seq-K --------------------------------*------------	FUS|ENSG00000089280.19	ENST00000254108.12;ENST00000380244.7;ENST00000474990.5;ENST00000487509.6;ENST00000566605.5;ENST00000568685.1;ENST00000569760.5	3UTR;CDS	61	28	31	3		68	26	30	2
chr16	31190362	31190363	bulges	+	chr16:31190327-31190362:+	FALSE	5'- GGAGGATTTCCCAGTGGAGGTGGTGGCGGTGGAGGACAGCAGCGA -3' rG4seq-K -----------------------------------*---------	FUS|ENSG00000089280.19	ENST00000254108.12;ENST00000380244.7;ENST00000474990.5;ENST00000487509.6;ENST00000566605.5;ENST00000568685.1;ENST00000569760.5	3UTR;CDS	109	44	34	3		136	70	34	4
chr16	31190976	31190979	two-quartet	+	chr16:31190829-31190842:+,chr16:31190962-31190977:+	TRUE	5'- GGCTCTCACATGGGGGGTAACTACGGGGATGATCGTCG -3' rG4seq-K ---------------------------***--------	FUS|ENSG00000089280.19	ENST00000254108.12;ENST00000380244.7;ENST00000474990.5;ENST00000483853.1;ENST00000487509.6;ENST00000566605.5;ENST00000568685.1;ENST00000569760.5	3UTR;CDS	67	18	78	4		92	27	55	3
chr16	31191071	31191074	bulges	+	chr16:31191042-31191073:+	FALSE	5'- GGAGGCTTCCGAGGGGGCCGGGGTGGTGGGGACAGAGGTGG -3' rG4seq-K -----------------------------***---------	FUS|ENSG00000089280.19	ENST00000254108.12;ENST00000380244.7;ENST00000474990.5;ENST00000483853.1;ENST00000487509.6;ENST00000566605.5;ENST00000568685.1;ENST00000569760.5	3UTR;CDS	219	104	127	7		289	132	89	6
chr16	56626923	56626925	potential G-triplex & G>=40%	+	chr16:56626865-56626925:+	FALSE	5'- CCCTTCTTCCCCAGGCTGCTGTTCCTGCTGCCCCGTGGGCTGTGCCAAGTGTGCCCAGGGCTGCGTCTGC -3' rG4seq-K ----------------------------------------------------------**----------	MT1E|ENSG00000169715.15	ENST00000306061.10;ENST00000330439.7;ENST00000568293.1	3UTR;CDS	111	19	230	18		109	27	186	15
chr16	67871031	67871033	bulges	+	chr16:67871013-67871032:+	FALSE	5'- GGGCCGCGGTGGGAGTGGGCGCAGTGCGC -3' rG4seq-K ------------------**---------	NUTF2|ENSG00000102898.12	ENST00000219169.9;ENST00000568396.2;ENST00000569436.6;ENST00000587481.1	3UTR	34	10	32	0		29	11	14	0
chr16	68835191	68835193	bulges	+	chr16:68835158-68835193:+	FALSE	5'- GTGGCCCTAAAGGGGGTTAGTTGAGGGGTAGGGGGTAGTGAGGAT -3' rG4seq-K ---------------------------------**----------	CDH1|ENSG00000039068.20	ENST00000261769.10	3UTR	40	22	38	3		49	25	40	1
chr16	69463348	69463350	two-quartet	+	chr16:69463331-69463349:+	FALSE	5'- GGGGGTGGAAAGGTAGGGATGAATTGGG -3' rG4seq-K -----------------**---------	CYB5B|ENSG00000103018.18	ENST00000307892.13;ENST00000515314.7;ENST00000684784.1;ENST00000686649.1;ENST00000687780.1;ENST00000688840.1;ENST00000689149.1;ENST00000691260.1;ENST00000692523.1;ENST00000692677.1	3UTR	65	43	43	6		64	40	26	3
chr16	69463359	69463360	bulges	+	chr16:69463331-69463360:+	FALSE	5'- GGGGGTGGAAAGGTAGGGATGAATTGGGGTGATAGAACC -3' rG4seq-K ----------------------------*----------	CYB5B|ENSG00000103018.18	ENST00000307892.13;ENST00000515314.7;ENST00000684784.1;ENST00000686649.1;ENST00000687780.1;ENST00000688840.1;ENST00000689149.1;ENST00000691260.1;ENST00000692523.1;ENST00000692677.1	3UTR	86	26	27	1		78	24	15	0
chr16	69698504	69698505	potential G-quadruplex & G>=40%	+	chr16:69698445-69698505:+	FALSE	5'- GTGAGTTTGTCTGATGTTCTACCACAACGTGGCGTCTGATAACAGTGAGGGGGGGTGGGGTTTGTTATGT -3' rG4seq-K -----------------------------------------------------------*----------	NFAT5|ENSG00000102908.22	ENST00000349945.7;ENST00000354436.6;ENST00000393742.7;ENST00000426654.6;ENST00000627621.3;ENST00000650987.1	3UTR	19	16	7	1		30	20	11	2
chr16	85799738	85799741	longloop	+	chr16:85799707-85799740:+	FALSE	5'- GGGACACCGGGTGTAGAGGGCGGTCGCGGCGGGCAGTGGCGGC -3' rG4seq-K -------------------------------***---------	COX4I1|ENSG00000131143.10	ENST00000253452.8;ENST00000561569.5;ENST00000562336.5;ENST00000563774.1;ENST00000564544.1;ENST00000565078.5;ENST00000566115.5;ENST00000566405.5;ENST00000567241.5;ENST00000567266.5;ENST00000568339.5;ENST00000568794.5;ENST00000570123.5	5UTR	92	41	75	12		101	47	72	1
chr16	89563129	89563130	canonical/G3L1-7	+	chr16:89563105-89563130:+	FALSE	5'- GGGAACAACTGGGCCTGGGATGGGGCTTCACTGCT -3' rG4seq-K ------------------------*----------	RPL13|ENSG00000167526.14	ENST00000311528.10;ENST00000393099.3;ENST00000452368.7;ENST00000472354.1;ENST00000562879.5	3UTR	27	14	20	3		38	25	10	1
chr16	89911232	89911234	bulges	+	chr16:89911204-89911233:+	FALSE	5'- GGACGACGCTGAGGGGGAGGGGGAGTGGGACTGAGCGTC -3' rG4seq-K ----------------------------**---------	ENSG00000267048|ENSG00000267048.1;TCF25|ENSG00000141002.20	ENST00000263346.13;ENST00000263347.11;ENST00000562256.5;ENST00000564957.5;ENST00000565860.1;ENST00000566283.1;ENST00000567171.1;ENST00000570116.6;ENST00000570217.1;ENST00000640279.1	3UTR;CDS;non_coding	49	29	24	0		61	37	36	2
chr17	2685181	2685183	two-quartet	+	chr17:2685167-2685182:+	FALSE	5'- GGGGTGGGGGGAGGGCAAGCTGGAT -3' rG4seq-K --------------**---------	PAFAH1B1|ENSG00000007168.14	ENST00000397195.10;ENST00000571495.2;ENST00000610190.2;ENST00000674608.1;ENST00000674717.1;ENST00000675202.1;ENST00000675331.1;ENST00000675390.1;ENST00000675574.1;ENST00000675764.1;ENST00000676077.1;ENST00000676098.1;ENST00000676188.1;ENST00000676353.1	3UTR	38	21	20	1		51	31	17	3
chr17	5007523	5007524	longloop	+	chr17:5007487-5007523:+	FALSE	5'- GGGGGTGGCCGTCCGGGAGGATGGGGGAACTGTGGGCGTCTTCTCT -3' rG4seq-K ------------------------------------*---------	KIF1C|ENSG00000129250.12	ENST00000320785.10;ENST00000572959.1	CDS	22	10	12	0		29	12	8	0
chr17	5024447	5024449	canonical/G3L1-7	+	chr17:5024428-5024449:+	FALSE	5'- GGGTGGGGTGGGGGGCTGGGGTGCTGCGTAG -3' rG4seq-K -------------------**----------	KIF1C|ENSG00000129250.12	ENST00000320785.10	3UTR	60	30	16	0		60	41	13	2
chr17	7222291	7222292	two-quartet	+	chr17:7222272-7222293:+	FALSE	5'- GGTGGAGAGGGGCTTCGGGGGCATTACCCAG -3' rG4seq-K -------------------*-----------	ACADVL|ENSG00000072778.20	ENST00000322910.9;ENST00000350303.9;ENST00000356839.10;ENST00000543245.6;ENST00000577191.5;ENST00000581378.5;ENST00000582379.1	3UTR;CDS	32	17	19	1		32	16	17	1
chr17	7222774	7222775	bulges	+	chr17:7222735-7222774:+	FALSE	5'- GGTGCCATCGGAGAACGTGCTGGGTGAGGTTGGGAGTGGCTTCAAGGTT -3' rG4seq-K ---------------------------------------*---------	ACADVL|ENSG00000072778.20	ENST00000322910.9;ENST00000350303.9;ENST00000356839.10;ENST00000543245.6;ENST00000578824.5;ENST00000581378.5;ENST00000582379.1;ENST00000583858.5	3UTR;CDS	25	12	20	1		27	18	24	1
chr17	7307680	7307681	bulges	+	chr17:7307649-7307683:+	FALSE	5'- GCGGCGGCGGCGGTAGAGGCGGCGGCGGCGGCGGCAGCGGGCTC -3' rG4seq-K -------------------------------*------------	EIF5A|ENSG00000132507.18	ENST00000336452.11;ENST00000336458.13;ENST00000355068.4;ENST00000572815.5;ENST00000573542.5;ENST00000575001.1;ENST00000576930.5	5UTR	73	15	50	1		96	30	38	1
chr17	28674388	28674389	two-quartet	+	chr17:28674371-28674388:+	FALSE	5'- GGGGAGGAGGATGAGGGCAGTGACTCT -3' rG4seq-K -----------------*---------	SUPT6H|ENSG00000109111.15	ENST00000314616.11;ENST00000347486.8;ENST00000584312.1	3UTR;CDS	21	19	9	0		28	23	9	2
chr17	28701883	28701884	bulges	+	chr17:28701864-28701885:+	FALSE	5'- GGAGGGGAGTGTGGCAGGGAGGAGGAAGAGG -3' rG4seq-K -------------------*-----------	SUPT6H|ENSG00000109111.15	ENST00000314616.11	3UTR	12	7	8	0		8	5	12	0
chr17	28749611	28749612	bulges	+	chr17:28749585-28749612:+	FALSE	5'- GGGGTTCGAGGGGAAAGGACGATGGGGCATGACCTCA -3' rG4seq-K --------------------------*----------	TRAF4|ENSG00000076604.16	ENST00000262395.10;ENST00000262396.10;ENST00000444415.7	3UTR	26	16	11	0		25	17	12	1
chr17	28749931	28749932	canonical/G3L1-7	+	chr17:28749910-28749931:+	FALSE	5'- GGGGGTGGGAATTGGGGAGGGAGAAAGGGTA -3' rG4seq-K ---------------------*---------	TRAF4|ENSG00000076604.16	ENST00000262395.10;ENST00000444415.7	3UTR;CDS	73	72	18	3		73	69	13	6
chr17	32444545	32444546	bulges	+	chr17:32444515-32444547:+	FALSE	5'- GCGGTAAGATGGCGGCGGCGGCGGTGGTGGAGTTCCAGAGAG -3' rG4seq-K ------------------------------*-----------	PSMD11|ENSG00000108671.11	ENST00000261712.8;ENST00000457654.6;ENST00000481992.1;ENST00000578213.5;ENST00000578397.5;ENST00000579451.1;ENST00000649012.1	5UTR;CDS	19	12	15	1		26	17	10	0
chr17	35726289	35726291	canonical/G3L1-7	+	chr17:35726273-35726291:+	FALSE	5'- GGGGAGGGGGGGCAGGGGAAATGTTGCC -3' rG4seq-K ----------------**----------	AP2B1|ENSG00000006125.18	ENST00000610402.5;ENST00000621914.4	3UTR	91	82	36	7		100	91	32	6
chr17	35726365	35726367	canonical/G3L1-7	+	chr17:35726347-35726367:+	FALSE	5'- GGGAGGGTGGGGGTTGGGGGAAGCTTGACC -3' rG4seq-K ------------------**----------	AP2B1|ENSG00000006125.18	ENST00000610402.5;ENST00000621914.4	3UTR	111	61	33	4		138	74	18	0
chr17	35824156	35824160	longloop	+	chr17:35824127-35824159:+	FALSE	5'- GGGTCACAGGGAGGAGGTAGAGGGCGTGGGGGATATGACAAG -3' rG4seq-K -----------------------------****---------	TAF15|ENSG00000270647.7	ENST00000603393.6;ENST00000603427.6;ENST00000603777.6;ENST00000604694.2;ENST00000604841.5;ENST00000604879.6;ENST00000605197.3;ENST00000605844.6;ENST00000685897.1;ENST00000689923.1	3UTR;CDS	113	56	108	5		169	70	77	1
chr17	35842455	35842456	bulges	+	chr17:35842429-35842455:+	FALSE	5'- GAGGAGGTGGAAGTGGAGGTGGGCGGCGAGGCCGTG -3' rG4seq-K --------------------------*---------	TAF15|ENSG00000270647.7	ENST00000603067.6;ENST00000603393.6;ENST00000603777.6;ENST00000604694.2;ENST00000604841.5;ENST00000605844.6;ENST00000685897.1;ENST00000687618.1;ENST00000689923.1	3UTR;CDS	14	8	16	1		15	8	9	0
chr17	35844145	35844146	potential G-quadruplex & G>=40%	+	chr17:35844086-35844146:+	FALSE	5'- ATATAGAGGTCGTGGAGGCTTTCAAGGGAGAGGTGGAGACCCCAAAAGTGGGGATTGGGTTTGCCCTAAT -3' rG4seq-K -----------------------------------------------------------*----------	TAF15|ENSG00000270647.7	ENST00000603067.6;ENST00000603393.6;ENST00000603777.6;ENST00000604694.2;ENST00000604841.5;ENST00000605844.6;ENST00000685897.1;ENST00000687618.1;ENST00000689923.1	3UTR;CDS	17	8	22	0		21	8	13	0
chr17	35844870	35844871	bulges	+	chr17:35844833-35844872:+	FALSE	5'- GAGGAGGTTATGGAGGAGATCGAGGAGGCTATGGAGGAGACAGAAGCCG -3' rG4seq-K -------------------------------------*-----------	TAF15|ENSG00000270647.7	ENST00000603067.6;ENST00000603777.6;ENST00000604694.2;ENST00000604841.5;ENST00000605844.6;ENST00000687618.1;ENST00000689923.1	3UTR;CDS	29	12	13	0		31	18	12	2
chr17	37513040	37513041	canonical/G3L1-7	+	chr17:37513018-37513040:+	FALSE	5'- GGGAGGGAGGGGACATAAAGGGAATGCATACA -3' rG4seq-K ----------------------*---------	DUSP14|ENSG00000276023.5	ENST00000613659.1;ENST00000614411.1;ENST00000617516.5	3UTR	33	29	6	0		47	43	7	0
chr17	40457389	40457390	longloop	+	chr17:40457351-40457389:+	FALSE	5'- GGGAGGTGGGGTACATTTCTCTGAGCAGTCAGGGTGGGAAGAAAGAAT -3' rG4seq-K --------------------------------------*---------	IGFBP4|ENSG00000141753.7	ENST00000269593.5	3UTR	24	17	14	1		42	30	7	1
chr17	42833493	42833494	longloop	+	chr17:42833466-42833493:+	FALSE	5'- GGGCGGGCGGACGGCACAGAGGGAGGGAGCGAGCGAG -3' rG4seq-K ---------------------------*---------	PSME3|ENSG00000131467.12	ENST00000293362.7;ENST00000441946.6;ENST00000541124.5;ENST00000543428.5;ENST00000545225.5;ENST00000585805.5;ENST00000586114.5;ENST00000589469.5;ENST00000590720.6;ENST00000591152.5;ENST00000591722.5;ENST00000592578.5	5UTR	50	40	18	0		84	70	8	0
chr17	45148568	45148569	canonical/G3L1-7	+	chr17:45148547-45148568:+	FALSE	5'- GGGAAGGGGGAGGAGGGAGGGAGGAAAAGAG -3' rG4seq-K ---------------------*---------	HEXIM1|ENSG00000186834.4	ENST00000332499.4	5UTR	12	9	27	6		22	19	11	3
chr17	45149960	45149962	canonical/G3L1-7	+	chr17:45149939-45149962:+	FALSE	5'- GGGCAGCGATGGGATGGGAGGGGACGGCAGCGA -3' rG4seq-K ---------------------**----------	HEXIM1|ENSG00000186834.4	ENST00000332499.4	CDS	43	30	17	0		61	38	26	0
chr17	47650073	47650074	bulges	+	chr17:47650042-47650074:+	FALSE	5'- GGGAGGAAGTAAGGGAAGAGGAGAGGAAGGGGAGCCGGACCG -3' rG4seq-K -------------------------------*----------	KPNB1|ENSG00000108424.11	ENST00000290158.9;ENST00000535458.6;ENST00000583648.6	5UTR	29	17	16	0		30	19	21	0
chr17	47683306	47683307	bulges	+	chr17:47683292-47683308:+	FALSE	5'- GGGGGGGAGGGGGGAGAAAAAGAAAA -3' rG4seq-K --------------*-----------	KPNB1|ENSG00000108424.11	ENST00000290158.9;ENST00000582126.1;ENST00000583648.6	3UTR	63	54	17	3		65	53	21	2
chr17	50079110	50079112	canonical/G3L1-7	+	chr17:50079086-50079111:+	FALSE	5'- GGGGGAGGGGCTGGTGGGCCTGGGGACCCTGGTCC -3' rG4seq-K ------------------------**---------	ITGA3|ENSG00000005884.18	ENST00000007722.11;ENST00000320031.13;ENST00000505306.5;ENST00000506827.1;ENST00000515147.1	CDS	78	52	30	0		106	65	13	2
chr17	51161190	51161192	bulges	+	chr17:51161163-51161191:+	FALSE	5'- GGGAGGGGCTGAATGTGGTGAAGACGGGCCGAGTCATG -3' rG4seq-K ---------------------------**---------	NME1-NME2|ENSG00000011052.21;NME1|ENSG00000239672.8	ENST00000013034.3;ENST00000336097.7;ENST00000376392.10;ENST00000393193.6;ENST00000393196.8;ENST00000475573.5;ENST00000480143.5;ENST00000511355.5;ENST00000555572.1	3UTR;CDS	12	8	41	3		31	9	27	0
chr17	58089779	58089781	two-quartet	+	chr17:58089750-58089780:+	FALSE	5'- GGAAAAAGGGGTAGGAAGGAAGGTGGAGGGATTGATCTAG -3' rG4seq-K -----------------------------**---------	DYNLL2|ENSG00000264364.3	ENST00000579991.3	3UTR	24	13	29	2		40	20	13	1
chr17	58089850	58089852	canonical/G3L1-7	+	chr17:58089831-58089852:+	FALSE	5'- GGGGCGGAGGGTGGGGTGGGGATGCCTTCTT -3' rG4seq-K -------------------**----------	DYNLL2|ENSG00000264364.3	ENST00000579991.3	3UTR	74	36	12	0		77	52	22	2
chr17	58090288	58090289	canonical/G3L1-7	+	chr17:58090261-58090290:+	FALSE	5'- GGGGTTTGGGGTAGAAGGGAGGGAGGGGGCAGGACAGTG -3' rG4seq-K ---------------------------*-----------	DYNLL2|ENSG00000264364.3	ENST00000579991.3	3UTR	33	27	14	0		41	35	11	0
chr17	58090763	58090766	canonical/G3L1-7	+	chr17:58090744-58090765:+	FALSE	5'- GGGGTGGGGTTTGGGGTGGGGTGGTCATTGC -3' rG4seq-K -------------------***---------	DYNLL2|ENSG00000264364.3	ENST00000579991.3	3UTR	187	82	48	4		287	132	29	5
chr17	58090977	58090978	bulges	+	chr17:58090952-58090977:+	FALSE	5'- GTTGGCAGGGGAGGGGAGACCTGGGTGGTGACTGA -3' rG4seq-K -------------------------*---------	DYNLL2|ENSG00000264364.3	ENST00000579991.3	3UTR	21	14	17	2		30	25	6	0
chr17	58090980	58090981	bulges	+	chr17:58090959-58090982:+	FALSE	5'- GGGGAGGGGAGACCTGGGTGGTGACTGAGTTCC -3' rG4seq-K ---------------------*-----------	DYNLL2|ENSG00000264364.3	ENST00000579991.3	3UTR	39	19	17	0		53	22	6	0
chr17	77500399	77500400	canonical/G3L1-7	+	chr17:77500381-77500400:+	FALSE	5'- GGGGTGGGGTGGGGGTGGGCAGCAGCATC -3' rG4seq-K ------------------*----------	SEPTIN9|ENSG00000184640.20	ENST00000329047.13;ENST00000423034.6;ENST00000427177.6;ENST00000427180.5;ENST00000427674.6;ENST00000431235.6;ENST00000449803.6;ENST00000541152.6	3UTR	51	46	10	0		65	57	8	0
chr17	82239005	82239006	bulges	+	chr17:82238982-82239005:+	FALSE	5'- GGGCGGGGCCGGCAGGCACAGGGAGGAGGTACA -3' rG4seq-K -----------------------*---------	SLC16A3|ENSG00000141526.18	ENST00000392339.6;ENST00000392341.6;ENST00000577650.6;ENST00000578684.6;ENST00000580098.6;ENST00000580189.6;ENST00000581287.5;ENST00000582715.1;ENST00000582743.6;ENST00000583025.1;ENST00000584689.6;ENST00000617373.5;ENST00000619321.2	3UTR	12	8	7	0		6	6	11	3
chr17	82239144	82239146	bulges	+	chr17:82239124-82239145:+	FALSE	5'- GGGGGAAGGTGGCGGGGTGGGAACCGTGTCA -3' rG4seq-K --------------------**---------	SLC16A3|ENSG00000141526.18	ENST00000392339.6;ENST00000392341.6;ENST00000577650.6;ENST00000578684.6;ENST00000580098.6;ENST00000580189.6;ENST00000581287.5;ENST00000582715.1;ENST00000582743.6;ENST00000583025.1;ENST00000584689.6;ENST00000617373.5;ENST00000619321.2	3UTR	72	42	30	1		98	52	23	0
chr17	82239315	82239317	canonical/G3L1-7	+	chr17:82239301-82239316:+	FALSE	5'- GGGAGGGTGGGTGGGCCGCAGACAG -3' rG4seq-K --------------**---------	SLC16A3|ENSG00000141526.18	ENST00000392339.6;ENST00000392341.6;ENST00000577650.6;ENST00000578684.6;ENST00000580098.6;ENST00000580189.6;ENST00000581287.5;ENST00000582715.1;ENST00000582743.6;ENST00000583025.1;ENST00000584689.6;ENST00000617373.5;ENST00000619321.2	3UTR	63	48	6	1		106	76	30	3
chr17	83079674	83079675	canonical/G3L1-7	+	chr17:83079657-83079674:+	FALSE	5'- GGGCCGGGATGGGCGGGCGGCCGCGCG -3' rG4seq-K -----------------*---------	METRNL|ENSG00000176845.13	ENST00000320095.12	5UTR	11	9	10	1		21	11	16	0
chr18	3450233	3450234	bulges	+	chr18:3450215-3450236:+	FALSE	5'- GGAGCGGAGAGGGGAGGGGAGAGAGTTGGGC -3' rG4seq-K ------------------*------------	TGIF1|ENSG00000177426.22	ENST00000343820.10;ENST00000401449.5;ENST00000405385.7;ENST00000407501.6;ENST00000546979.5;ENST00000548489.6;ENST00000549253.5;ENST00000549780.5;ENST00000550958.5;ENST00000551402.1;ENST00000552383.5;ENST00000577543.5;ENST00000618001.4	5UTR	15	12	6	1		8	7	8	1
chr18	31498241	31498242	bulges	+	chr18:31498202-31498241:+	FALSE	5'- GGCGGCGGCGCGGAGCGGTGCGGCGGCGGGAGGCGGAGGCGAGGGTGCG -3' rG4seq-K ---------------------------------------*---------	DSG2|ENSG00000046604.14	ENST00000261590.13;ENST00000585206.1	5UTR	11	7	12	1		12	8	10	0
chr18	31498246	31498248	bulges	+	chr18:31498208-31498249:+	FALSE	5'- GGCGCGGAGCGGTGCGGCGGCGGGAGGCGGAGGCGAGGGTGCGATGGCGCG -3' rG4seq-K --------------------------------------**-----------	DSG2|ENSG00000046604.14	ENST00000261590.13;ENST00000585206.1;ENST00000683654.1	5UTR	43	15	20	0		78	37	27	2
chr19	583331	583333	two-quartet	+	chr19:583314-583334:+	FALSE	5'- GGGGGCAGCTCTGGAGGGGGTTTGCTGGGG -3' rG4seq-K -----------------**-----------	BSG|ENSG00000172270.22	ENST00000333511.9;ENST00000346916.9;ENST00000353555.9;ENST00000545507.6;ENST00000571735.3;ENST00000573784.6;ENST00000576925.4;ENST00000576984.3;ENST00000614867.2;ENST00000618006.4;ENST00000618112.4;ENST00000679472.1;ENST00000680065.1;ENST00000680326.1;ENST00000680552.1	3UTR	73	53	36	14		111	87	33	14
chr19	1271574	1271576	two-quartet	+	chr19:1271549-1271576:+	FALSE	5'- GGAGGAGGGGACCGAGGCTATGGGGGGAACCGGTTCG -3' rG4seq-K -------------------------**----------	CIRBP|ENSG00000099622.14	ENST00000320936.9;ENST00000413636.6;ENST00000585630.5;ENST00000585913.5;ENST00000585914.5;ENST00000586472.5;ENST00000586548.5;ENST00000586636.5;ENST00000586773.5;ENST00000587169.5;ENST00000587323.5;ENST00000587896.6;ENST00000588030.5;ENST00000588090.5;ENST00000588230.5;ENST00000588344.2;ENST00000589235.5;ENST00000589686.5;ENST00000589710.5;ENST00000590171.1;ENST00000590347.5;ENST00000590704.5;ENS…	3UTR;CDS	59	14	48	2		85	25	48	1
chr19	1271600	1271602	potential G-quadruplex & G>=40%	+	chr19:1271542-1271602:+	FALSE	5'- ATGTGCAGGAGGAGGGGACCGAGGCTATGGGGGGAACCGGTTCGAGTCCAGGAGTGGGGGCTACGGAGGC -3' rG4seq-K ----------------------------------------------------------**----------	CIRBP|ENSG00000099622.14	ENST00000320936.9;ENST00000413636.6;ENST00000585630.5;ENST00000585913.5;ENST00000585914.5;ENST00000586472.5;ENST00000586548.5;ENST00000586636.5;ENST00000586773.5;ENST00000587169.5;ENST00000587323.5;ENST00000587896.6;ENST00000588030.5;ENST00000588090.5;ENST00000588230.5;ENST00000588344.2;ENST00000589235.5;ENST00000589686.5;ENST00000589710.5;ENST00000590171.1;ENST00000590347.5;ENST00000590704.5;ENS…	3UTR;CDS	62	25	28	3		42	25	32	2
chr19	8485614	8485616	two-quartet	+	chr19:8474230-8474244:+,chr19:8485602-8485615:+	TRUE	5'- GGGCAGGATAAATGGTGGAGGTGGAGGAAGCGTCCCT -3' rG4seq-K --------------------------**---------	HNRNPM|ENSG00000099783.12	ENST00000325495.9;ENST00000348943.7;ENST00000594907.5;ENST00000597081.1;ENST00000597270.1;ENST00000598367.5;ENST00000598603.1;ENST00000600092.5;ENST00000600806.5;ENST00000620401.4	3UTR;CDS	36	14	26	2		55	24	17	1
chr19	8488750	8488751	two-quartet	+	chr19:8488718-8488750:+	FALSE	5'- GGAGAATGGGAAGTCCAAGGGGTGTGGCGTGGTTAAGTTCGA -3' rG4seq-K --------------------------------*---------	HNRNPM|ENSG00000099783.12	ENST00000325495.9;ENST00000348943.7;ENST00000596295.1;ENST00000600806.5;ENST00000602219.1;ENST00000620401.4	3UTR;CDS	11	7	9	0		21	17	8	0
chr19	10092289	10092291	bulges	+	chr19:10092247-10092289:+	FALSE	5'- GGAGGAGGAGGAAGAGGAGGAGGTGGAGGACGAGGAGGGCGGGCCCAGGGAG -3' rG4seq-K ------------------------------------------**--------	SHFL|ENSG00000130813.18	ENST00000253110.16;ENST00000397881.7;ENST00000585919.5;ENST00000586730.1;ENST00000591813.5;ENST00000593131.1	3UTR;CDS	38	17	17	1		28	14	21	2
chr19	10110379	10110380	bulges	+	chr19:10110355-10110379:+	FALSE	5'- GGTCCAGGAGGGCGTCGGGGAGGGCAAAGTGATG -3' rG4seq-K ------------------------*---------	PPAN-P2RY11|ENSG00000243207.6;PPAN|ENSG00000130810.20	ENST00000253107.12;ENST00000393793.5;ENST00000393796.4;ENST00000428358.5;ENST00000444703.1;ENST00000468881.1	CDS	23	20	11	1		32	23	10	0
chr19	10683722	10683723	bulges	+	chr19:10683704-10683722:+	FALSE	5'- GGGCGGGGAAGAGGCGGGAGCATCCGGG -3' rG4seq-K ------------------*---------	ILF3|ENSG00000129351.17	ENST00000250241.12;ENST00000407004.7;ENST00000449870.5;ENST00000587928.5;ENST00000588657.5;ENST00000589998.5;ENST00000590261.5;ENST00000592763.5;ENST00000593061.5	CDS	19	14	14	0		22	14	17	1
chr19	10687409	10687413	bulges	+	chr19:10687384-10687412:+	FALSE	5'- GTGGCGGTGGCGGCGGGGGCGGTGGTGGCTCCTCCGGC -3' rG4seq-K -------------------------*-**---------	ILF3|ENSG00000129351.17	ENST00000449870.5;ENST00000587928.5;ENST00000588657.5;ENST00000590261.5;ENST00000590869.1;ENST00000591649.5	CDS	139	65	33	3		201	79	41	0
chr19	10713311	10713313	longloop	+	chr19:10713289-10713313:+	FALSE	5'- GGGAGGAAGGAAGGGAGGGAGGGGCTGGAAGATA -3' rG4seq-K ----------------------**----------	QTRT1|ENSG00000213339.9	ENST00000250237.10;ENST00000421333.6;ENST00000587500.5;ENST00000587861.5;ENST00000589488.5;ENST00000592376.1;ENST00000592531.1	3UTR	56	33	15	1		66	43	14	0
chr19	10718150	10718151	longloop	+	chr19:10718114-10718151:+	FALSE	5'- GGGAGCGGGCGTCTTGCCGAGGCCCGGGCGGGCGGGGAGCAACGGCT -3' rG4seq-K ------------------------------------*----------	DNM2|ENSG00000079805.19	ENST00000355667.11;ENST00000359692.10;ENST00000389253.9;ENST00000585892.5;ENST00000682285.1;ENST00000682524.1;ENST00000683738.1	5UTR	11	6	9	0		16	6	15	0
chr19	10831308	10831312	bulges	+	chr19:10831279-10831310:+	FALSE	5'- GGGGGATGGAGTCTCAGGGTGGCAGAGGGGGGACCAGAACC -3' rG4seq-K -----------------------------****--------	DNM2|ENSG00000079805.19	ENST00000355667.11;ENST00000359692.10;ENST00000389253.9;ENST00000408974.8;ENST00000590806.5;ENST00000591818.1;ENST00000593203.1;ENST00000681972.1	3UTR	63	22	18	1		79	32	24	0
chr19	12737530	12737531	bulges	+	chr19:12737507-12737533:+	FALSE	5'- GGCGGCAGGGGTGGCCGGGTGGGGGGTTGAGGCAGA -3' rG4seq-K -----------------------*------------	GET3|ENSG00000198356.12	ENST00000357332.8;ENST00000590633.1;ENST00000591090.5	CDS	17	16	8	2		30	26	7	2
chr19	12943803	12943804	two-quartet	+	chr19:12943792-12943803:+	FALSE	5'- GGAGGAGGAGGCAGAGGACAA -3' rG4seq-K -----------*---------	CALR|ENSG00000179218.15	ENST00000316448.10;ENST00000586760.2;ENST00000586803.1;ENST00000586967.2;ENST00000588454.6;ENST00000680816.1	3UTR;CDS	52	17	107	7		72	32	89	4
chr19	12943818	12943819	bulges	+	chr19:12943790-12943818:+	FALSE	5'- GAGGAGGAGGAGGCAGAGGACAAGGAGGATGATGAGGA -3' rG4seq-K ----------------------------*---------	CALR|ENSG00000179218.15	ENST00000316448.10;ENST00000586760.2;ENST00000586803.1;ENST00000586967.2;ENST00000588454.6;ENST00000680816.1	3UTR;CDS	132	70	137	12		197	99	113	19
chr19	12943827	12943828	bulges	+	chr19:12943792-12943827:+	FALSE	5'- GGAGGAGGAGGCAGAGGACAAGGAGGATGATGAGGACAAAGATGA -3' rG4seq-K -----------------------------------*---------	CALR|ENSG00000179218.15	ENST00000316448.10;ENST00000586760.2;ENST00000586803.1;ENST00000586967.2;ENST00000588454.6;ENST00000680816.1	3UTR;CDS	156	34	145	11		220	45	111	9
chr19	12943866	12943867	bulges	+	chr19:12943835-12943866:+	FALSE	5'- GAGGATGAGGAGGATGAGGAGGACAAGGAGGAAGATGAGGA -3' rG4seq-K -------------------------------*---------	CALR|ENSG00000179218.15	ENST00000316448.10;ENST00000586760.2;ENST00000586803.1;ENST00000586967.2;ENST00000588454.6;ENST00000680816.1	3UTR;CDS	131	90	146	9		193	149	81	13
chr19	12943878	12943879	bulges	+	chr19:12943841-12943878:+	FALSE	5'- GAGGAGGATGAGGAGGACAAGGAGGAAGATGAGGAGGAAGATGTCCC -3' rG4seq-K -------------------------------------*---------	CALR|ENSG00000179218.15	ENST00000316448.10;ENST00000586760.2;ENST00000586803.1;ENST00000586967.2;ENST00000588454.6;ENST00000680816.1	3UTR;CDS	292	112	160	13		391	142	109	17
chr19	12952779	12952781	two-quartet	+	chr19:12952765-12952780:+	FALSE	5'- GGAGGGGGAGGTGGGCGCCATAGGA -3' rG4seq-K --------------**---------	RAD23A|ENSG00000179262.10	ENST00000316856.7;ENST00000586375.1;ENST00000586534.6;ENST00000590881.1;ENST00000591467.1;ENST00000591499.5;ENST00000592268.5;ENST00000593114.5;ENST00000651137.1	3UTR;CDS	23	11	22	0		32	13	18	0
chr19	13136081	13136082	bulges	+	chr19:13136047-13136081:+	FALSE	5'- GAGGAGGACGAGGAGGAGGATGGTGGCGAGGAGGGCATGGATGA -3' rG4seq-K ----------------------------------*---------	NACC1|ENSG00000160877.6	ENST00000292431.5	CDS	19	15	12	2		26	19	8	0
chr19	13154472	13154473	potential G-quadruplex & G>=40%	+	chr19:13154413-13154473:+	FALSE	5'- TGCGTGGGTGTGGGGCCTGGGAGGAGGTCCTGGGGCGTGCACCCGCCCTGGGCAGTGGGGAGGAGAGTGG -3' rG4seq-K -----------------------------------------------------------*----------	IER2|ENSG00000160888.7	ENST00000292433.4;ENST00000588173.1	3UTR	21	14	26	1		32	18	19	0
chr19	16101860	16101862	bulges	+	chr19:16101836-16101861:+	FALSE	5'- GGGGGCCGGGGGTGGCTATTGTGGGAAGTCATAAC -3' rG4seq-K ------------------------**---------	TPM4|ENSG00000167460.17	ENST00000300933.9;ENST00000344824.11;ENST00000586193.6;ENST00000586499.6;ENST00000586833.7;ENST00000588032.6;ENST00000588483.2;ENST00000590180.3;ENST00000591226.2;ENST00000591645.3;ENST00000642221.1;ENST00000642789.1;ENST00000643494.1;ENST00000643579.2;ENST00000645471.1;ENST00000646575.1;ENST00000646974.2;ENST00000647037.1;ENST00000647464.2;ENST00000653961.1;ENST00000653979.1;ENST00000655004.1;EN…	3UTR	78	59	52	7		86	63	33	5
chr19	34393258	34393259	bulges	+	chr19:34381514-34381519:+,chr19:34393247-34393261:+	TRUE	5'- GGGATTGGGTGGGAGGACGCTACTCGCTG -3' rG4seq-K ----------------*------------	GPI|ENSG00000105220.17	ENST00000356487.11;ENST00000415930.8;ENST00000586425.2;ENST00000588991.7;ENST00000589985.5;ENST00000643067.1;ENST00000647446.1	CDS	26	22	10	1		44	41	15	2
chr19	36141080	36141083	canonical/G3L1-7	+	chr19:36141056-36141082:+	FALSE	5'- GGGGGAGGCGGGGGCCTGGGTGGGGGCCTGGGAAAT -3' rG4seq-K ------------------------***---------	CAPNS1|ENSG00000126247.11	ENST00000246533.8;ENST00000587718.5;ENST00000588780.5;ENST00000588815.5;ENST00000589146.5;ENST00000590874.5;ENST00000591041.5;ENST00000592483.5;ENST00000628018.2;ENST00000628306.2;ENST00000629983.2	CDS	145	29	95	0		166	35	71	2
chr19	36141178	36141179	bulges	+	chr19:36141137-36141178:+	FALSE	5'- GGCGGCGGCGGCGGCGGTGGTGGAGGCGGCGGTGGCGGTGGAACGGCCATG -3' rG4seq-K -----------------------------------------*---------	CAPNS1|ENSG00000126247.11	ENST00000246533.8;ENST00000587718.5;ENST00000588780.5;ENST00000588815.5;ENST00000589146.5;ENST00000590049.5;ENST00000590874.5;ENST00000591041.5;ENST00000592483.5;ENST00000628018.2;ENST00000628306.2;ENST00000629983.2	CDS	40	19	7	0		68	26	10	0
chr19	36238421	36238422	two-quartet	+	chr19:36238406-36238421:+	FALSE	5'- GGGAGGTGGGATGGGTATTGGTTAA -3' rG4seq-K ---------------*---------	ZNF146|ENSG00000167635.12	ENST00000443387.3;ENST00000456324.5	3UTR	40	30	12	1		43	34	8	1
chr19	38292040	38292042	bulges	+	chr19:38292021-38292042:+	FALSE	5'- GAGGACTGGGGAAGGGAGGGGAGACTATGTG -3' rG4seq-K -------------------**----------	ENSG00000267748|ENSG00000267748.4;SPINT2|ENSG00000167642.13	ENST00000301244.12;ENST00000454580.7;ENST00000585357.1;ENST00000587090.5;ENST00000587334.1;ENST00000587519.4;ENST00000591889.2	3UTR;non_coding	142	67	107	5		125	76	100	2
chr19	38292073	38292075	potential G-quadruplex & G>=40%	+	chr19:38292015-38292075:+	FALSE	5'- CGCCAAGAGGACTGGGGAAGGGAGGGGAGACTATGTGTGAGCTTTTTTTAAATAGAGGGATTGACTCGGA -3' rG4seq-K ----------------------------------------------------------**----------	ENSG00000267748|ENSG00000267748.4;SPINT2|ENSG00000167642.13	ENST00000301244.12;ENST00000454580.7;ENST00000585357.1;ENST00000587090.5;ENST00000587334.1;ENST00000587519.4;ENST00000591889.2	3UTR;non_coding	106	20	129	7		157	41	90	5
chr19	38647697	38647698	bulges	+	chr19:38647662-38647699:+	FALSE	5'- GGCGGTAGCGGCGGCGGCTCGGGCAGAGGGGCGGGAGCTGAGGCGGG -3' rG4seq-K -----------------------------------*-----------	ACTN4|ENSG00000130402.13	ENST00000252699.7;ENST00000424234.7;ENST00000440400.2;ENST00000588618.5	5UTR	16	10	17	0		31	19	20	2
chr19	38647709	38647710	longloop	+	chr19:38647682-38647709:+	FALSE	5'- GGGCAGAGGGGCGGGAGCTGAGGCGGGAGCGGACAGG -3' rG4seq-K ---------------------------*---------	ACTN4|ENSG00000130402.13	ENST00000252699.7;ENST00000424234.7;ENST00000440400.2;ENST00000588618.5	5UTR	69	42	22	1		116	79	23	1
chr19	38647726	38647728	bulges	+	chr19:38647694-38647727:+	FALSE	5'- GGGAGCTGAGGCGGGAGCGGACAGGCTGGTGGGCGAGCGAGAG -3' rG4seq-K --------------------------------**---------	ACTN4|ENSG00000130402.13	ENST00000252699.7;ENST00000424234.7;ENST00000440400.2;ENST00000588618.5	5UTR	243	54	89	2		360	89	76	6
chr19	38729559	38729561	canonical/G3L1-7	+	chr19:38729544-38729560:+	FALSE	5'- GGGGTGGGTGGGTGGGCAGGGAGGGG -3' rG4seq-K ---------------**---------	ACTN4|ENSG00000130402.13	ENST00000252699.7;ENST00000440400.2;ENST00000497637.5;ENST00000589528.1	3UTR	40	30	33	9		39	30	23	3
chr19	38729575	38729577	canonical/G3L1-7	+	chr19:38729549-38729576:+	FALSE	5'- GGGTGGGTGGGCAGGGAGGGGCTGGGGCAGGCTCTCT -3' rG4seq-K --------------------------**---------	ACTN4|ENSG00000130402.13	ENST00000252699.7;ENST00000440400.2;ENST00000497637.5;ENST00000589528.1	3UTR	293	79	95	3		390	123	66	2
chr19	38729580	38729581	bulges	+	chr19:38729545-38729580:+	FALSE	5'- GGGTGGGTGGGTGGGCAGGGAGGGGCTGGGGCAGGCTCTCTCCTC -3' rG4seq-K -----------------------------------*---------	ACTN4|ENSG00000130402.13	ENST00000252699.7;ENST00000440400.2;ENST00000497637.5;ENST00000589528.1	3UTR	233	66	50	1		304	76	33	1
chr19	41307442	41307444	canonical/G3L1-7	+	chr19:41307413-41307443:+	FALSE	5'- GGGTGAGAGGGAAGAAGGGGAGGTTGGGGGGCTCCTTCCC -3' rG4seq-K -----------------------------**---------	HNRNPUL1|ENSG00000105323.18	ENST00000352456.7;ENST00000392006.8	3UTR	34	16	15	0		45	26	17	3
chr19	49103913	49103915	canonical/G3L1-7	+	chr19:49103890-49103916:+	FALSE	5'- GGGCGAGATGGGGCAGGGCTGGGGGGAGGCAGAGTC -3' rG4seq-K -----------------------**-----------	SNRNP70|ENSG00000104852.15	ENST00000221448.9;ENST00000401730.5;ENST00000544278.2;ENST00000595231.5;ENST00000598441.6;ENST00000601065.5	non_coding	26	12	16	0		15	10	12	0
chr19	49688368	49688371	canonical/G3L1-7	+	chr19:49688346-49688369:+	FALSE	5'- GGGGCCTGGGCTGGGGGGATGGGGAGGGCACAT -3' rG4seq-K ----------------------***--------	PRMT1|ENSG00000126457.22	ENST00000391851.8;ENST00000454376.7;ENST00000527866.1;ENST00000530361.5;ENST00000532489.5;ENST00000610806.4	3UTR	130	36	70	4		165	56	41	3
chr19	49688373	49688375	canonical/G3L1-7	+	chr19:49688346-49688374:+	FALSE	5'- GGGGCCTGGGCTGGGGGGATGGGGAGGGCACATCGTGA -3' rG4seq-K ---------------------------**---------	PRMT1|ENSG00000126457.22	ENST00000391851.8;ENST00000454376.7;ENST00000527866.1;ENST00000530361.5;ENST00000532489.5;ENST00000610806.4	3UTR	245	102	55	4		329	138	38	6
chr19	53875258	53875260	canonical/G3L1-7	+	chr19:53875233-53875259:+	FALSE	5'- GGGGGGTGGGGGGTGGGTAGCTGGGGATTGGGCCCT -3' rG4seq-K -------------------------**---------	MYADM|ENSG00000179820.16	ENST00000391769.2;ENST00000391770.9;ENST00000391771.1	3UTR	69	31	22	2		64	26	14	1
chr19	54461169	54461170	canonical/G3L1-7	+	chr19:54461145-54461171:+	FALSE	5'- GGGGATGGGCAGCGGAGGGTTGGGGGCATGGTCTGC -3' rG4seq-K ------------------------*-----------	LENG8|ENSG00000167615.17	ENST00000326764.10;ENST00000376514.6;ENST00000421200.1;ENST00000610347.1;ENST00000616932.4	3UTR	28	20	13	1		46	30	7	0
chr19	55674270	55674271	canonical/G3L1-7	+	chr19:55674241-55674270:+	FALSE	5'- GGGGGGTTAGGGCAGGGAGGGGACTGGGGAAGTGCGCAC -3' rG4seq-K -----------------------------*---------	U2AF2|ENSG00000063244.13	ENST00000308924.9;ENST00000450554.6	3UTR	35	14	15	1		46	21	13	1
chr2	15591927	15591928	bulges	+	chr2:15591893-15591930:+	FALSE	5'- GAGGGAGCGAGCAGGCGAAGCCGCGGAGGACGGGGTGAAGATGGCGG -3' rG4seq-K ----------------------------------*------------	DDX1|ENSG00000079785.16	ENST00000233084.8;ENST00000381341.7;ENST00000434671.2;ENST00000459706.2;ENST00000470674.2;ENST00000478695.2;ENST00000617198.5;ENST00000621973.2;ENST00000676635.1;ENST00000676759.1;ENST00000676916.1;ENST00000676937.1;ENST00000677302.1;ENST00000677355.1;ENST00000677437.1;ENST00000677552.1;ENST00000678137.1;ENST00000678391.1;ENST00000678536.1;ENST00000678594.1;ENST00000678755.1;ENST00000678786.1;ENS…	5UTR	12	9	13	1		17	11	6	0
chr2	20448536	20448539	canonical/G3L1-7	+	chr2:20448507-20448538:+	FALSE	5'- GGGAGGGGAGGGCTGCTGGGGAGGATGGGGGGATGTTATAT -3' rG4seq-K -----------------------------***---------	RHOB|ENSG00000143878.10	ENST00000272233.6	3UTR	167	74	59	2		215	102	75	5
chr2	53787227	53787228	bulges	+	chr2:53787190-53787229:+	FALSE	5'- GGAGAAAGCGGCGGCGGAGGATGGAGGAAGGAGGCGGCGGCGTACGGAG -3' rG4seq-K -------------------------------------*-----------	ERLEC1|ENSG00000068912.15	ENST00000185150.9;ENST00000378239.5;ENST00000405123.7;ENST00000494373.2;ENST00000684875.1;ENST00000685400.1;ENST00000685508.1;ENST00000686424.1;ENST00000687536.1;ENST00000687552.1;ENST00000687723.1;ENST00000688096.1;ENST00000688147.1;ENST00000688274.1;ENST00000688464.1;ENST00000689100.1;ENST00000689106.1;ENST00000689291.1;ENST00000689496.1;ENST00000689887.1;ENST00000689943.1;ENST00000690020.1;ENS…	5UTR;CDS	28	12	15	0		38	12	21	0
chr2	53787230	53787231	bulges	+	chr2:53787197-53787232:+	FALSE	5'- GCGGCGGCGGAGGATGGAGGAAGGAGGCGGCGGCGTACGGAGTCT -3' rG4seq-K ---------------------------------*-----------	ERLEC1|ENSG00000068912.15	ENST00000185150.9;ENST00000378239.5;ENST00000405123.7;ENST00000494373.2;ENST00000684875.1;ENST00000685400.1;ENST00000685508.1;ENST00000686424.1;ENST00000687536.1;ENST00000687552.1;ENST00000687723.1;ENST00000688096.1;ENST00000688147.1;ENST00000688274.1;ENST00000688464.1;ENST00000689100.1;ENST00000689106.1;ENST00000689291.1;ENST00000689496.1;ENST00000689887.1;ENST00000689943.1;ENST00000690020.1;ENS…	5UTR;CDS	53	24	15	1		78	38	21	0
chr2	84906530	84906531	potential G-quadruplex & G>=40%	+	chr2:84906471-84906531:+	FALSE	5'- ATGTGGAGGAAGAGCCACCTGCAAGATGGACACGAGCCACAAGCTGCACTGTGAACCTGGGCACTCCGCG -3' rG4seq-K -----------------------------------------------------------*----------	TMSB10|ENSG00000034510.6	ENST00000233143.6	3UTR	76	11	122	2		98	17	88	3
chr2	113957491	113957492	bulges	+	chr2:113957459-113957492:+	FALSE	5'- GGCTTCATAGTTATTGGGGTTAGGGAGGTGGGGAAGAGATAAT -3' rG4seq-K --------------------------------*----------	ACTR3|ENSG00000115091.12	ENST00000263238.7;ENST00000478928.1;ENST00000535589.3	3UTR	34	24	16	3		45	36	10	1
chr2	169584407	169584408	bulges	+	chr2:169584384-169584407:+	FALSE	5'- GGGGGAGGGAGGCGGTTAGCGGGCTTTAGCGCC -3' rG4seq-K -----------------------*---------	PPIG|ENSG00000138398.17	ENST00000260970.8;ENST00000409714.7;ENST00000414307.6;ENST00000433207.6;ENST00000462903.6;ENST00000530152.5;ENST00000676508.1;ENST00000676557.1;ENST00000677392.1;ENST00000677750.1;ENST00000678088.1;ENST00000678695.1;ENST00000678721.1;ENST00000679324.1	5UTR	21	13	7	0		26	19	6	1
chr2	172506003	172506004	two-quartet	+	chr2:172505986-172506003:+	FALSE	5'- GGGTGTTGGGAGGGTGGTTCAACAAAG -3' rG4seq-K -----------------*---------	ITGA6|ENSG00000091409.16	ENST00000264107.12;ENST00000409080.6;ENST00000442250.6;ENST00000684293.1	3UTR	23	19	18	1		30	23	11	2
chr2	227472196	227472197	two-quartet	+	chr2:227472171-227472196:+	FALSE	5'- GGGAAGGTGGCGGCGGCGGCGGCGGTTGTCCCGGC -3' rG4seq-K -------------------------*---------	AGFG1|ENSG00000173744.18;MIR5703|ENSG00000284092.1	ENST00000310078.13;ENST00000409979.6;ENST00000640052.1	5UTR;non_coding	10	7	8	0		27	13	6	0
chr2	230416308	230416309	longloop	+	chr2:230416279-230416308:+	FALSE	5'- GGGCCTAGGGTGGGAAGATGGCAGGTGGGGGCGGCGACC -3' rG4seq-K -----------------------------*---------	SP100|ENSG00000067066.17	ENST00000264052.9;ENST00000340126.9;ENST00000409112.5;ENST00000409341.5;ENST00000409824.5;ENST00000427101.6;ENST00000432979.5	5UTR;CDS	16	10	6	0		14	10	6	0
chr2	230873466	230873467	bulges	+	chr2:230873447-230873468:+	FALSE	5'- GGGGGGGCTCAGTGGGCGGCGTGTGCTACCT -3' rG4seq-K -------------------*-----------	ITM2C|ENSG00000135916.16	ENST00000326407.10;ENST00000326427.11;ENST00000335005.10;ENST00000409704.6;ENST00000418408.2;ENST00000457215.5;ENST00000492029.1;ENST00000541852.5;ENST00000543957.5	5UTR;CDS	12	9	9	0		13	11	7	1
chr2	230878470	230878472	canonical/G3L1-7	+	chr2:230878447-230878471:+	FALSE	5'- GGGCAAGGGGATGGGGCTGTGGGGGCGGGGCGGC -3' rG4seq-K -----------------------**---------	ITM2C|ENSG00000135916.16	ENST00000326407.10;ENST00000326427.11;ENST00000335005.10;ENST00000620962.1	3UTR;CDS	23	7	32	0		31	15	27	2
chr2	230878476	230878477	canonical/G3L1-7	+	chr2:230878453-230878477:+	FALSE	5'- GGGGATGGGGCTGTGGGGGCGGGGCGGCATGGGC -3' rG4seq-K -----------------------*----------	ITM2C|ENSG00000135916.16	ENST00000326407.10;ENST00000326427.11;ENST00000335005.10;ENST00000620962.1	3UTR;CDS	56	35	20	1		59	29	18	0
chr2	235053913	235053914	two-quartet	+	chr2:235053887-235053913:+	FALSE	5'- GGAGCTGAAGAGGGAGGAAGGGGCGGCTGCTCAGAC -3' rG4seq-K --------------------------*---------	SH3BP4|ENSG00000130147.16	ENST00000344528.8;ENST00000392011.7;ENST00000409212.5	3UTR	16	10	24	1		16	10	19	0
chr2	240467619	240467621	longloop	+	chr2:240467581-240467620:+	FALSE	5'- GGGTCCTGCAGGGGGAGGAGGACTTGGAGGGTCTGGGGGCAGCTGTCCT -3' rG4seq-K --------------------------------------**---------	GPC1|ENSG00000063660.9	ENST00000264039.7	3UTR	82	38	12	0		73	34	22	0
chr2	241350152	241350153	bulges	+	chr2:241350131-241350154:+	FALSE	5'- GGGCGGGGATGGCGATGGCGGGGCTCTCGGGCA -3' rG4seq-K ---------------------*-----------	SEPTIN2|ENSG00000168385.18	ENST00000360051.7;ENST00000391971.7;ENST00000391973.6;ENST00000401990.5;ENST00000402092.6;ENST00000407971.5;ENST00000421717.1;ENST00000451310.1;ENST00000616972.4	CDS	22	9	21	1		28	11	19	1
chr2	241350162	241350163	longloop	+	chr2:241350131-241350162:+	FALSE	5'- GGGCGGGGATGGCGATGGCGGGGCTCTCGGGCACCACGTGT -3' rG4seq-K -------------------------------*---------	SEPTIN2|ENSG00000168385.18	ENST00000360051.7;ENST00000391971.7;ENST00000391973.6;ENST00000401990.5;ENST00000402092.6;ENST00000407971.5;ENST00000421717.1;ENST00000451310.1;ENST00000616972.4	CDS	103	71	22	0		138	93	26	3
chr20	396662	396663	bulges	+	chr20:396632-396662:+	FALSE	5'- GGGGCTGGACGAAGCCAGGGAAGAGGAGGGAGACAGAGAA -3' rG4seq-K ------------------------------*---------	TRIB3|ENSG00000101255.12	ENST00000217233.9;ENST00000422053.3	CDS	18	11	22	0		19	14	14	1
chr20	37405355	37405356	bulges	+	chr20:37405329-37405356:+	FALSE	5'- GGCCCAGACTTGCGGGGGGTGGGGGGGTATCCAGAAT -3' rG4seq-K --------------------------*----------	SRC|ENSG00000197122.13	ENST00000358208.9;ENST00000373558.2;ENST00000373567.6;ENST00000373578.7;ENST00000477066.5;ENST00000692112.1;ENST00000692423.1	3UTR	10	9	6	0		19	15	6	0
chr20	41124030	41124033	canonical/G3L1-7	+	chr20:41124010-41124032:+	FALSE	5'- GGGGTTGGGGAGGGATGAAGGGCGAGTGAATC -3' rG4seq-K --------------------***---------	TOP1|ENSG00000198900.7	ENST00000361337.3;ENST00000680945.1;ENST00000681058.1;ENST00000681113.1;ENST00000681392.1;ENST00000681884.1	3UTR	131	76	86	2		123	85	42	2
chr20	49952896	49952897	longloop	+	chr20:49952863-49952896:+	FALSE	5'- GGGGAGGAGGGTCAGCTAAGAGAAGTGGGAGGGCCAGAGCTTT -3' rG4seq-K ---------------------------------*---------	RNF114|ENSG00000124226.11	ENST00000244061.6;ENST00000622920.1;ENST00000622999.3	3UTR	42	31	12	1		39	26	6	0
chr20	62804914	62804915	two-quartet	+	chr20:62804887-62804914:+	FALSE	5'- GGGAGGAGGACGAGGAGGATGCGGAGGACGCGGAGGA -3' rG4seq-K ---------------------------*---------	OGFR|ENSG00000060491.17	ENST00000290291.10	CDS	6	4	10	0		7	7	11	0
chr20	62813939	62813940	bulges	+	chr20:62813922-62813940:+	FALSE	5'- GGGGGGCGGCGGGCAGGGCTGCTTTTCT -3' rG4seq-K -----------------*----------	OGFR|ENSG00000060491.17	ENST00000290291.10;ENST00000370461.5	3UTR	21	17	6	0		12	7	7	0
chr20	63891044	63891046	bulges	+	chr20:63891020-63891045:+	FALSE	5'- GGTCAGGTGGAGGGTGGGGCGTGGGCATCAGCCAG -3' rG4seq-K ------------------------**---------	TPD52L2|ENSG00000101150.18	ENST00000217121.9;ENST00000346249.9;ENST00000348257.9;ENST00000351424.8;ENST00000352482.8;ENST00000358548.4;ENST00000474176.2;ENST00000611972.4;ENST00000615907.4	3UTR	64	41	38	3		143	90	38	2
chr21	38823306	38823307	two-quartet	+	chr21:38823292-38823307:+	FALSE	5'- GGGTAGGAGGGTGGGAAGGAAACAA -3' rG4seq-K --------------*----------	ETS2|ENSG00000157557.13	ENST00000360214.8;ENST00000360938.8;ENST00000653642.1;ENST00000662305.1;ENST00000666778.1;ENST00000667466.1	3UTR	46	41	23	9		25	20	10	1
chr22	20117542	20117544	canonical/G3L1-7	+	chr22:20117515-20117543:+	FALSE	5'- GGGGCGGAGGGAAGAGCGGGCGGGCGGGAGGCGCCGGC -3' rG4seq-K ---------------------------**---------	RANBP1|ENSG00000099901.17	ENST00000402752.5;ENST00000430524.6;ENST00000432879.5;ENST00000435265.5;ENST00000488484.1	5UTR	25	15	15	1		48	31	25	1
chr22	20507663	20507664	bulges	+	chr22:20507632-20507665:+	FALSE	5'- GGTGGCGGCCAAGCGGGATACGGGCGGCGGGAGCTGGGGAACA -3' rG4seq-K -------------------------------*-----------	MED15|ENSG00000099917.17	ENST00000263205.11;ENST00000292733.11;ENST00000382974.6;ENST00000406969.5;ENST00000414658.5;ENST00000432052.5;ENST00000433831.5;ENST00000444094.5;ENST00000445987.5;ENST00000477824.5;ENST00000486656.5	5UTR	14	7	13	0		21	9	11	0
chr22	21644213	21644216	bulges	+	chr22:21644179-21644217:+	FALSE	5'- GTGGATGGATGGGTGGATGGAGGGTGGCAGGTGGGGCGTCTGCAGGGC -3' rG4seq-K ----------------------------------***-----------	SDF2L1|ENSG00000128228.5	ENST00000248958.5	3UTR	278	135	105	11		358	161	85	13
chr22	29288768	29288769	bulges	+	chr22:29288739-29288771:+	FALSE	5'- GGAGGCATGAGCAGAGGTGGGCGGGGAGGAGGACGCGGTGGA -3' rG4seq-K -----------------------------*------------	EWSR1|ENSG00000182944.18	ENST00000331029.11;ENST00000332035.10;ENST00000332050.10;ENST00000333395.10;ENST00000397938.7;ENST00000406548.5;ENST00000414183.6;ENST00000479135.5;ENST00000483415.5;ENST00000629659.2	CDS	41	25	20	2		63	37	21	4
chr22	37569164	37569166	bulges	+	chr22:37569138-37569167:+	FALSE	5'- GCGGCCCGTGGGGGGTGGGGGGCAGGGAGTGTACCACAC -3' rG4seq-K --------------------------**-----------	CDC42EP1|ENSG00000128283.7	ENST00000249014.5	3UTR	34	20	20	2		59	34	24	2
chr22	37807126	37807128	canonical/G3L1-7	+	chr22:37807102-37807127:+	FALSE	5'- GGGAGGGGGAGGGGGAGTGGGCGGGCAGTGGATAG -3' rG4seq-K ------------------------**---------	H1-0|ENSG00000189060.6	ENST00000340857.4	3UTR	85	57	30	5		137	82	38	3
chr22	41906295	41906298	longloop	+	chr22:41906250-41906297:+	FALSE	5'- GGGGAGGAGGGGGGCCCAGCCCTGGGAGGCTGGTGGGAGGCAGGGGGCAGGCCTGCG -3' rG4seq-K ---------------------------------------------***---------	SREBF2|ENSG00000198911.12	ENST00000361204.9;ENST00000424354.5;ENST00000491541.1;ENST00000612482.4	3UTR	79	24	32	1		116	46	53	1
chr22	49963712	49963714	canonical/G3L1-7	+	chr22:49963687-49963715:+	FALSE	5'- GGGGACAGTGGGGAGGCAGGGGAGGGGGTGGCTGTGGT -3' rG4seq-K -------------------------**-----------	PIM3|ENSG00000198355.5	ENST00000360612.5	3UTR	30	19	30	3		35	22	26	2
chr3	9806330	9806331	canonical/G3L1-7	+	chr3:9806310-9806330:+	FALSE	5'- GGGAGTTGGGTTGGGGTGGGCATTTGATGC -3' rG4seq-K --------------------*---------	ARPC4-TTLL3|ENSG00000250151.9;ARPC4|ENSG00000241553.13	ENST00000397256.5;ENST00000397261.8;ENST00000417500.5;ENST00000418163.5;ENST00000424442.5;ENST00000433034.1;ENST00000440787.5;ENST00000453882.1;ENST00000498623.6	3UTR;non_coding	30	29	13	2		32	29	11	1
chr3	23807261	23807263	longloop	+	chr3:23807235-23807263:+	FALSE	5'- GGGGCTGTTTGCGGGGTGGGGTGGGGGGTTCGCTATGT -3' rG4seq-K --------------------------**----------	UBE2E1|ENSG00000170142.12	ENST00000306627.8;ENST00000346855.7;ENST00000442670.5;ENST00000481622.1;ENST00000484048.1;ENST00000495141.5	5UTR	53	18	38	5		93	35	28	1
chr3	23890688	23890689	canonical/G3L1-7	+	chr3:23890670-23890688:+	FALSE	5'- GGGGTCAGGGAGGGTGGGAGTTGGTAAA -3' rG4seq-K ------------------*---------	UBE2E1|ENSG00000170142.12	ENST00000306627.8;ENST00000346855.7;ENST00000424381.5;ENST00000452012.1;ENST00000475680.5;ENST00000493707.1	3UTR	58	55	12	5		71	67	8	2
chr3	49012540	49012543	canonical/G3L1-7	+	chr3:49012518-49012543:+	FALSE	5'- GGGCGTGGGTACCGGGGATTGGGGGTCTCGGCTCT -3' rG4seq-K ----------------------***----------	WDR6|ENSG00000178252.19	ENST00000395474.7;ENST00000415265.6;ENST00000420783.7;ENST00000448293.5;ENST00000452875.5;ENST00000471162.5;ENST00000489684.2;ENST00000608424.6;ENST00000610967.4	3UTR;CDS	47	19	21	0		48	29	22	1
chr3	51385333	51385334	bulges	+	chr3:51385298-51385333:+	FALSE	5'- GGCGGCGGCAGCGGAGGAGGAGGAGGAGGAGGAGGATGAGGAGGA -3' rG4seq-K -----------------------------------*---------	MANF|ENSG00000145050.19	ENST00000528157.7	5UTR	50	33	54	11		44	28	39	2
chr3	51385342	51385343	bulges	+	chr3:51385301-51385342:+	FALSE	5'- GGCGGCAGCGGAGGAGGAGGAGGAGGAGGAGGATGAGGAGGATGAGGAGGA -3' rG4seq-K -----------------------------------------*---------	MANF|ENSG00000145050.19	ENST00000528157.7	5UTR	131	66	70	9		152	76	45	4
chr3	101574234	101574236	bulges	+	chr3:101574208-101574235:+	FALSE	5'- GGGGAAAATGGCGGACGGGAAGGCGGGAGACGAGAAG -3' rG4seq-K --------------------------**---------	PCNP|ENSG00000081154.12	ENST00000265260.8;ENST00000460231.5;ENST00000469941.5;ENST00000486406.5;ENST00000498274.5;ENST00000627393.1	5UTR;CDS	18	8	24	1		34	14	12	0
chr3	128071582	128071583	bulges	+	chr3:128071559-128071584:+	FALSE	5'- GATGGTCACGGTGGGTGGGTGGGGGCTGACCCCAG -3' rG4seq-K -----------------------*-----------	SEC61A1|ENSG00000058262.10	ENST00000243253.8;ENST00000424880.2;ENST00000483956.1	3UTR	59	40	16	1		77	47	23	0
chr3	128071603	128071604	bulges	+	chr3:128071571-128071602:+	FALSE	5'- GGGTGGGTGGGGGCTGACCCCAGCTTCCAGGGGACTGTCAC -3' rG4seq-K --------------------------------*--------	SEC61A1|ENSG00000058262.10	ENST00000243253.8;ENST00000424880.2;ENST00000483956.1	3UTR	134	50	33	1		157	51	38	3
chr3	133574201	133574202	canonical/G3L1-7	+	chr3:133574178-133574202:+	FALSE	5'- GGGTGCGGCGGGCGGCGGGGCGGGCGCGGGGACC -3' rG4seq-K -----------------------*----------	CDV3|ENSG00000091527.17	ENST00000264993.8;ENST00000431519.6;ENST00000503932.6;ENST00000688838.1	CDS	29	20	10	1		31	21	11	0
chr3	133574208	133574209	canonical/G3L1-7	+	chr3:133574187-133574209:+	FALSE	5'- GGGCGGCGGGGCGGGCGCGGGGACCCGGCCGG -3' rG4seq-K ---------------------*----------	CDV3|ENSG00000091527.17	ENST00000264993.8;ENST00000431519.6;ENST00000503932.6;ENST00000688838.1	CDS	79	28	16	0		76	33	14	1
chr3	133584081	133584083	two-quartet	+	chr3:133584054-133584082:+	FALSE	5'- GGGAAGAAGGTGGAGGTGGTGGTGGAGGTATGGAAAAA -3' rG4seq-K ---------------------------**---------	CDV3|ENSG00000091527.17	ENST00000264993.8;ENST00000420115.6;ENST00000431519.6;ENST00000503932.6;ENST00000504867.5;ENST00000507408.5;ENST00000508481.5;ENST00000511392.5;ENST00000515421.1;ENST00000688838.1	3UTR;CDS	35	21	31	2		38	23	22	1
chr3	133588779	133588780	longloop	+	chr3:133588749-133588779:+	FALSE	5'- GGGGTCCACCAAGTGGGGGAAGGGGAAGGGAGAGAATAAT -3' rG4seq-K ------------------------------*---------	CDV3|ENSG00000091527.17	ENST00000264993.8;ENST00000420115.6;ENST00000515421.1;ENST00000688838.1	3UTR	18	11	20	1		23	18	15	1
chr3	133819716	133819718	bulges	+	chr3:133819696-133819717:+	FALSE	5'- GGGTGGAAGAGGGGACGTGGGCTCTGCTGAC -3' rG4seq-K --------------------**---------	SRPRB|ENSG00000144867.13	ENST00000466490.7;ENST00000466636.1;ENST00000481356.1;ENST00000678299.1	CDS	87	36	52	2		112	53	50	0
chr3	184327300	184327302	bulges	+	chr3:184327272-184327301:+	FALSE	5'- GCGGAGTGAACGGGGAGGGGACCGTGGGGACCGGCTTGA -3' rG4seq-K ----------------------------**---------	EIF4G1|ENSG00000114867.22	ENST00000342981.8;ENST00000346169.7;ENST00000350481.9;ENST00000352767.7;ENST00000382330.7;ENST00000392537.6;ENST00000411531.5;ENST00000414031.5;ENST00000424196.5;ENST00000427845.5;ENST00000434061.6;ENST00000435046.7;ENST00000441154.5;ENST00000442406.5;ENST00000448284.1;ENST00000482303.1;ENST00000676453.1	3UTR;CDS	138	72	48	1		175	93	36	1
chr3	184335007	184335009	bulges	+	chr3:184334981-184335010:+	FALSE	5'- GGCGGCAGCAGCGGCGGTGGCAGTGGGTGCCTGTAGTGT -3' rG4seq-K --------------------------**-----------	EIF4G1|ENSG00000114867.22	ENST00000342981.8;ENST00000346169.7;ENST00000350481.9;ENST00000352767.7;ENST00000382330.7;ENST00000392537.6;ENST00000414031.5;ENST00000424196.5;ENST00000434061.6;ENST00000435046.7;ENST00000442406.5;ENST00000460829.5;ENST00000475721.5;ENST00000676453.1	3UTR	36	10	34	0		52	15	30	1
chr3	184335179	184335182	bulges	+	chr3:184335150-184335181:+	FALSE	5'- GAAATTTGGTGTGTCTTGGGGTGGGGAGGGGCACCAACGCC -3' rG4seq-K -----------------------------***---------	EIF4G1|ENSG00000114867.22	ENST00000342981.8;ENST00000346169.7;ENST00000350481.9;ENST00000352767.7;ENST00000392537.6;ENST00000414031.5;ENST00000424196.5;ENST00000434061.6;ENST00000442406.5;ENST00000475721.5;ENST00000676453.1	3UTR	42	14	47	3		59	19	53	2
chr3	184335201	184335203	bulges	+	chr3:184335167-184335201:+	FALSE	5'- GGGGTGGGGAGGGGCACCAACGCCTGCCCCTGGGGTCCTTTTTT -3' rG4seq-K ----------------------------------**--------	EIF4G1|ENSG00000114867.22	ENST00000342981.8;ENST00000346169.7;ENST00000350481.9;ENST00000352767.7;ENST00000392537.6;ENST00000414031.5;ENST00000424196.5;ENST00000434061.6;ENST00000442406.5;ENST00000475721.5;ENST00000676453.1	3UTR	89	24	52	3		128	42	45	3
chr4	56467659	56467661	bulges	+	chr4:56467637-56467662:+	FALSE	5'- GGCGAGCGGCGGCAGCGGGGGGGTGTCAGTACCTG -3' rG4seq-K ----------------------**-----------	SRP72|ENSG00000174780.17	ENST00000504757.2;ENST00000510663.6;ENST00000642900.1	CDS	65	43	16	1		64	39	18	0
chr4	70688915	70688916	bulges	+	chr4:70688882-70688917:+	FALSE	5'- GTGGAGACGAGGAGGATGGCGAGGAGGAGGAGGAGGAGGTGCTAG -3' rG4seq-K ---------------------------------*-----------	UTP3|ENSG00000132467.4	ENST00000254803.4	CDS	15	13	11	0		14	12	13	1
chr4	70688990	70688991	bulges	+	chr4:70688959-70688992:+	FALSE	5'- GGAGGGAATGCGGGGGAGGAGGAGGAGGAGGAGAATGCCGATG -3' rG4seq-K -------------------------------*-----------	UTP3|ENSG00000132467.4	ENST00000254803.4	CDS	37	29	14	2		43	27	11	1
chr4	75724761	75724762	longloop	+	chr4:75724729-75724763:+	FALSE	5'- GGGATTGGGGCCCAGGCCCTGCGGAGGGCGGGGGAAGTTGTCTT -3' rG4seq-K --------------------------------*-----------	USO1|ENSG00000138768.15	ENST00000264904.8;ENST00000514213.7	5UTR	23	19	8	0		38	26	9	1
chr4	176332081	176332085	bulges	+	chr4:176332065-176332084:+	FALSE	5'- GGGGGTGGGATGGGGGAGGTTAGTTACAC -3' rG4seq-K ----------------*-**---------	SPCS3|ENSG00000129128.13	ENST00000503362.2	3UTR	107	50	62	7		119	57	46	6
chr5	72908835	72908836	canonical/G3L1-7	+	chr5:72908819-72908835:+	FALSE	5'- GGGAGGGGCGGGAGGGAGGTGTTGCC -3' rG4seq-K ----------------*---------	TNPO1|ENSG00000083312.19	ENST00000337273.10;ENST00000503084.1;ENST00000506351.6;ENST00000679378.1;ENST00000680025.1;ENST00000680111.1;ENST00000680533.1;ENST00000681711.1	3UTR	59	55	7	0		63	57	6	1
chr5	72909391	72909392	canonical/G3L1-7	+	chr5:72909374-72909391:+	FALSE	5'- GGGGTGGGCAGGGAGGGAGGAATAAAT -3' rG4seq-K -----------------*---------	TNPO1|ENSG00000083312.19	ENST00000337273.10;ENST00000679378.1;ENST00000680025.1;ENST00000680111.1;ENST00000680533.1;ENST00000681711.1	3UTR	33	30	11	3		29	27	9	2
chr5	138465983	138465984	bulges	+	chr5:138465960-138465982:+	FALSE	5'- GCGGGGGCGGTGGAGGCGGCGGGGGCGGCAGC -3' rG4seq-K -----------------------*--------	EGR1|ENSG00000120738.8	ENST00000239938.5	CDS	13	7	23	0		23	7	28	0
chr5	138468102	138468103	potential G-quadruplex & G>=40%	+	chr5:138468043-138468103:+	FALSE	5'- CAGCAACCTTTTCTCCCAGGACAATTGAAATTTGCTAAAGGGAAAGGGGAAAGAAAGGGAAAAGGGAGAA -3' rG4seq-K -----------------------------------------------------------*----------	EGR1|ENSG00000120738.8	ENST00000239938.5	3UTR;CDS	24	11	42	3		21	14	18	2
chr5	138468109	138468110	canonical/G3L1-7	+	chr5:138468082-138468109:+	FALSE	5'- GGGAAAGGGGAAAGAAAGGGAAAAGGGAGAAAAAGAA -3' rG4seq-K ---------------------------*---------	EGR1|ENSG00000120738.8	ENST00000239938.5	3UTR	51	26	44	2		57	33	18	1
chr5	139341905	139341907	potential G-quadruplex & G>=40%	+	chr5:139341847-139341907:+	FALSE	5'- TGGGGTGTTTGTTTGGACTGGAGAAGGGAGGCGGCGGGCGAAGCGCACGTCGAGCGGGGGAGCGGCGCTG -3' rG4seq-K ----------------------------------------------------------**----------	PAIP2|ENSG00000120727.13	ENST00000265192.9;ENST00000507755.5;ENST00000510409.1;ENST00000511381.1;ENST00000511706.5	5UTR	27	10	16	0		48	24	29	3
chr5	139627126	139627127	two-quartet	+	chr5:139627106-139627126:+	FALSE	5'- GGTGTGAGGGGGGTGGTGGGTATGGTGTGT -3' rG4seq-K --------------------*---------	UBE2D2|ENSG00000131508.16	ENST00000398733.8;ENST00000398734.8;ENST00000505548.5	3UTR	34	28	10	3		35	29	8	1
chr5	146287148	146287149	canonical/G3L1-7	+	chr5:146287121-146287150:+	FALSE	5'- GGGGGGTGGGGGGTGGAGGTGGGAGGGGGTTGAGGGCTG -3' rG4seq-K ---------------------------*-----------	ENSG00000275740|ENSG00000275740.1;RBM27|ENSG00000091009.8	ENST00000265271.7;ENST00000506502.2	3UTR;non_coding	7	6	7	1		11	8	9	0
chr5	151804012	151804013	two-quartet	+	chr5:151803986-151804012:+	FALSE	5'- GGCCCTCGAGGTGGGCTGGGTGGTGGAATGAGAGGC -3' rG4seq-K --------------------------*---------	G3BP1|ENSG00000145907.16	ENST00000356245.8;ENST00000394123.7;ENST00000520177.6;ENST00000522761.6;ENST00000676507.1;ENST00000676634.1;ENST00000676644.1;ENST00000676715.1;ENST00000676734.1;ENST00000676827.1;ENST00000676878.1;ENST00000676899.1;ENST00000676911.1;ENST00000676978.1;ENST00000677105.1;ENST00000677323.1;ENST00000677381.1;ENST00000677493.1;ENST00000677658.1;ENST00000677687.1;ENST00000677757.1;ENST00000677923.1;ENS…	3UTR;CDS	12	9	11	1		15	7	15	0
chr5	154755442	154755443	canonical/G3L1-7	+	chr5:154755411-154755442:+	FALSE	5'- GGGCCGCCCCGGGGGCGGGGGGGAGGGAGGGACGGGACTAG -3' rG4seq-K -------------------------------*---------	LARP1|ENSG00000155506.19	ENST00000336314.9;ENST00000518297.6;ENST00000687700.1;ENST00000690816.1	5UTR	16	15	6	0		11	11	9	0
chr5	154755503	154755505	longloop	+	chr5:154755461-154755504:+	FALSE	5'- GGGCTCGGGGTGGGGGCGTCTTGCGAGGAACGGGCGGGGGGGGACGCACGCCT -3' rG4seq-K ------------------------------------------**---------	LARP1|ENSG00000155506.19	ENST00000336314.9;ENST00000518297.6;ENST00000687700.1;ENST00000690816.1	5UTR	41	14	18	0		71	23	22	1
chr5	154814143	154814144	canonical/G3L1-7	+	chr5:154814112-154814143:+	FALSE	5'- GGGGCTTGAGGGGGGAAAGGGGTAGGGTGGGTAAGAGTCCA -3' rG4seq-K -------------------------------*---------	LARP1|ENSG00000155506.19	ENST00000336314.9;ENST00000518297.6;ENST00000685355.1;ENST00000685946.1;ENST00000687700.1;ENST00000688232.1;ENST00000690816.1	3UTR	26	24	11	2		30	21	10	0
chr5	154814355	154814357	bulges	+	chr5:154814337-154814358:+	FALSE	5'- GGGGGGAGGGAAAGGGGGGAGATTTTTATAT -3' rG4seq-K ------------------**-----------	LARP1|ENSG00000155506.19	ENST00000336314.9;ENST00000518297.6;ENST00000685355.1;ENST00000685946.1;ENST00000687700.1;ENST00000688232.1;ENST00000690816.1	3UTR	48	20	47	1		37	19	31	0
chr5	154815676	154815680	longloop	+	chr5:154815642-154815679:+	FALSE	5'- GGGAACAAGGGATGAGGAGGAGTTGGGGGCTGGGGGGAATCCTGCCA -3' rG4seq-K ----------------------------------****---------	LARP1|ENSG00000155506.19	ENST00000336314.9;ENST00000518297.6;ENST00000685355.1;ENST00000685946.1;ENST00000687700.1;ENST00000688232.1;ENST00000690816.1	3UTR	117	36	62	7		125	50	56	5
chr5	168454035	168454036	bulges	+	chr5:168454004-168454038:+	FALSE	5'- GAGGAAGAGGAGGAGGAGGTGGAGGAGGAGGAGGGAGAAGAGGA -3' rG4seq-K -------------------------------*------------	WWC1|ENSG00000113645.15	ENST00000265293.9;ENST00000393895.7;ENST00000521089.5;ENST00000522140.1;ENST00000524038.5;ENST00000524228.5	CDS	15	11	12	1		23	15	9	1
chr5	168454038	168454039	bulges	+	chr5:168454004-168454041:+	FALSE	5'- GAGGAAGAGGAGGAGGAGGTGGAGGAGGAGGAGGGAGAAGAGGATGT -3' rG4seq-K ----------------------------------*------------	WWC1|ENSG00000113645.15	ENST00000265293.9;ENST00000393895.7;ENST00000521089.5;ENST00000522140.1;ENST00000524038.5;ENST00000524228.5	CDS	46	30	12	0		63	35	13	3
chr5	177595738	177595740	bulges	+	chr5:177595711-177595740:+	FALSE	5'- GAGGCTGCTGTTGGGGGTGGGGGGAGGGGAATGGGCAGG -3' rG4seq-K ---------------------------**----------	TMED9|ENSG00000184840.12	ENST00000332598.7	3UTR	211	155	99	14		261	213	116	21
chr5	177595746	177595747	canonical/G3L1-7	+	chr5:177595723-177595746:+	FALSE	5'- GGGGGTGGGGGGAGGGGAATGGGCAGGCAAGCC -3' rG4seq-K -----------------------*---------	TMED9|ENSG00000184840.12	ENST00000332598.7	3UTR	250	42	54	1		345	61	71	3
chr5	177595908	177595910	two-quartet	+	chr5:177595895-177595910:+	FALSE	5'- GGGTGGGTGGAGGGGTTTGCAGTGT -3' rG4seq-K -------------**----------	TMED9|ENSG00000184840.12	ENST00000332598.7	3UTR	120	79	54	5		165	92	46	2
chr5	178210132	178210133	bulges	+	chr5:178209408-178209432:+,chr5:178210131-178210132:+	TRUE	5'- GAGGGAACCGAGGCAGCGGAGGTGGTCAGAGTCAG -3' rG4seq-K -------------------------*---------	HNRNPAB|ENSG00000197451.12	ENST00000355836.9;ENST00000358344.8;ENST00000504898.5;ENST00000506259.5;ENST00000506339.5;ENST00000514633.5;ENST00000515193.5	CDS	92	66	25	3		123	93	21	4
chr5	178210553	178210554	bulges	+	chr5:178209408-178209432:+,chr5:178210552-178210553:+	TRUE	5'- GAGGGAACCGAGGCAGCGGAGGTGGTCAGGGTAGT -3' rG4seq-K -------------------------*---------	HNRNPAB|ENSG00000197451.12	ENST00000355836.9;ENST00000358344.8;ENST00000504898.5;ENST00000506259.5;ENST00000506339.5;ENST00000514633.5;ENST00000515193.5	CDS	48	31	43	8		62	35	24	4
chr5	179699062	179699063	bulges	+	chr5:179699041-179699062:+	FALSE	5'- GGGGCAAGGTGTGCGGGCGGGAAGGGGCACG -3' rG4seq-K ---------------------*---------	CANX|ENSG00000127022.16	ENST00000247461.9;ENST00000452673.6;ENST00000502296.6;ENST00000502498.6;ENST00000502673.6;ENST00000504734.5;ENST00000506654.6;ENST00000513246.6;ENST00000514032.5;ENST00000679395.1;ENST00000679471.1;ENST00000679523.1;ENST00000679527.1;ENST00000679642.1;ENST00000679719.1;ENST00000680006.1;ENST00000680042.1;ENST00000680092.1;ENST00000680406.1;ENST00000680504.1;ENST00000680614.1;ENST00000680618.1;ENS…	5UTR	37	24	34	3		39	32	22	2
chr5	179699066	179699069	longloop	+	chr5:179699041-179699068:+	FALSE	5'- GGGGCAAGGTGTGCGGGCGGGAAGGGGCACGGGCACC -3' rG4seq-K -------------------------***---------	CANX|ENSG00000127022.16	ENST00000247461.9;ENST00000452673.6;ENST00000502296.6;ENST00000502498.6;ENST00000502673.6;ENST00000504734.5;ENST00000506654.6;ENST00000513246.6;ENST00000514032.5;ENST00000679395.1;ENST00000679471.1;ENST00000679523.1;ENST00000679527.1;ENST00000679642.1;ENST00000679719.1;ENST00000680006.1;ENST00000680042.1;ENST00000680092.1;ENST00000680406.1;ENST00000680504.1;ENST00000680614.1;ENST00000680618.1;ENS…	5UTR	262	89	107	5		316	104	70	3
chr5	179699074	179699075	canonical/G3L1-7	+	chr5:179699055-179699074:+	FALSE	5'- GGGCGGGAAGGGGCACGGGCACCCCCGCG -3' rG4seq-K -------------------*---------	CANX|ENSG00000127022.16	ENST00000247461.9;ENST00000452673.6;ENST00000502296.6;ENST00000502498.6;ENST00000502673.6;ENST00000504734.5;ENST00000506654.6;ENST00000513246.6;ENST00000514032.5;ENST00000679395.1;ENST00000679471.1;ENST00000679523.1;ENST00000679527.1;ENST00000679642.1;ENST00000679719.1;ENST00000680006.1;ENST00000680042.1;ENST00000680092.1;ENST00000680406.1;ENST00000680504.1;ENST00000680614.1;ENST00000680618.1;ENS…	5UTR	165	27	40	0		191	34	26	0
chr5	179724769	179724770	bulges	+	chr5:179724749-179724771:+	FALSE	5'- GGAGATGAGGAGGAGGAAGGAGAAGAGAAACT -3' rG4seq-K --------------------*-----------	CANX|ENSG00000127022.16	ENST00000247461.9;ENST00000452673.6;ENST00000502296.6;ENST00000502673.6;ENST00000504734.5;ENST00000506654.6;ENST00000509563.2;ENST00000513246.6;ENST00000514032.5;ENST00000679395.1;ENST00000679471.1;ENST00000679523.1;ENST00000679527.1;ENST00000679642.1;ENST00000679719.1;ENST00000680006.1;ENST00000680013.1;ENST00000680042.1;ENST00000680092.1;ENST00000680406.1;ENST00000680504.1;ENST00000680614.1;ENS…	3UTR;CDS	27	8	65	2		42	14	33	2
chr5	179837961	179837962	potential G-quadruplex & G>=40%	+	chr5:179837902-179837962:+	FALSE	5'- CATGCCCTCCATGTGTAAGAACAATGCCAGGGCCCAGGAGGACCGCCTGCCCTGCCTGGGCCTTGGCTGG -3' rG4seq-K -----------------------------------------------------------*----------	SQSTM1|ENSG00000161011.20	ENST00000389805.9	3UTR	96	86	29	9		125	107	37	11
chr6	30725088	30725089	canonical/G3L1-7	+	chr6:30725066-30725091:+	FALSE	5'- GGGATCAAGGGGGTTGGGAGGGGGGAAAGAGACCA -3' rG4seq-K ----------------------*------------	TUBB|ENSG00000196230.14	ENST00000327892.13;ENST00000330914.7;ENST00000396384.1;ENST00000396389.5;ENST00000680530.1;ENST00000681421.1;ENST00000681435.1	3UTR	34	28	11	1		44	33	16	1
chr6	31631815	31631817	canonical/G3L1-7	+	chr6:31631789-31631816:+	FALSE	5'- GGGGACCTATGGGGGACGAGGGCGGGGAGCCCGAAGC -3' rG4seq-K --------------------------**---------	PRRC2A|ENSG00000204469.13	ENST00000376007.8;ENST00000376033.3	CDS	114	50	28	1		142	60	27	1
chr6	31835071	31835072	two-quartet	+	chr6:31835045-31835071:+	FALSE	5'- GGCCTGGCTGGGGTAGGAGAGGGCGGTCCCCAGTGC -3' rG4seq-K --------------------------*---------	ENSG00000285565|ENSG00000285565.1;SNHG32|ENSG00000204387.14	ENST00000375635.6;ENST00000375638.7;ENST00000375640.7;ENST00000375641.6;ENST00000375642.6;ENST00000395789.5;ENST00000614363.4;ENST00000648677.1;ENST00000649802.1	non_coding	20	9	15	1		30	13	17	1
chr6	32971816	32971817	bulges	+	chr6:32971787-32971817:+	FALSE	5'- GGGAAGACTTTGTTGGAAGGGGAGGCGGGGAGAGAGTGCT -3' rG4seq-K -----------------------------*----------	BRD2|ENSG00000204256.14	ENST00000374825.9;ENST00000374831.8;ENST00000449085.4;ENST00000456339.5;ENST00000464592.6;ENST00000469132.2;ENST00000482914.5;ENST00000495733.5;ENST00000496118.2;ENST00000580234.1;ENST00000581002.1;ENST00000584808.1;ENST00000677085.1;ENST00000677331.1;ENST00000678250.1;ENST00000678778.1;ENST00000679099.1;ENST00000679179.1	5UTR;CDS	10	10	9	1		13	10	10	1
chr6	32972127	32972129	potential G-quadruplex & G>=40%	+	chr6:32972069-32972129:+	FALSE	5'- CTTCACCCGCGTGAGCGAGCGCGCGCGCGCGGAGGGGGTGGGGAAAAGCTCAAGCAGGGTGGCGCGCATG -3' rG4seq-K ----------------------------------------------------------**----------	BRD2|ENSG00000204256.14	ENST00000374825.9;ENST00000374831.8;ENST00000449085.4;ENST00000456339.5;ENST00000464592.6;ENST00000469132.2;ENST00000482914.5;ENST00000495733.5;ENST00000496118.2;ENST00000580234.1;ENST00000677085.1;ENST00000677331.1;ENST00000678250.1;ENST00000678778.1;ENST00000679099.1;ENST00000679179.1	3UTR;5UTR	7	5	22	1		23	16	16	0
chr6	32974484	32974486	canonical/G3L1-7	+	chr6:32973410-32973412:+,chr6:32974461-32974486:+	TRUE	5'- GGGCTCCCTGGGGAAGGGAATGCAGGGTTGCTGGGGC -3' rG4seq-K -------------------------**----------	BRD2|ENSG00000204256.14	ENST00000374825.9;ENST00000374831.8;ENST00000395287.5;ENST00000449025.5;ENST00000449085.4;ENST00000456339.5;ENST00000463639.2;ENST00000464592.6;ENST00000469132.2;ENST00000482914.5;ENST00000495733.5;ENST00000607833.5;ENST00000677085.1;ENST00000677331.1;ENST00000678250.1;ENST00000678778.1;ENST00000679099.1;ENST00000679179.1	CDS	33	7	42	0		27	8	46	2
chr6	32977937	32977938	bulges	+	chr6:32977900-32977937:+	FALSE	5'- GAGGAAGAGGAGGAGGAAGATGAGGAGGACGAGGAGGAAGAAGAGAG -3' rG4seq-K -------------------------------------*---------	BRD2|ENSG00000204256.14	ENST00000374825.9;ENST00000374831.8;ENST00000395287.5;ENST00000449025.5;ENST00000449085.4;ENST00000463639.2;ENST00000464592.6;ENST00000469132.2;ENST00000481259.1;ENST00000482914.5;ENST00000495733.5;ENST00000607833.5;ENST00000677085.1;ENST00000677331.1;ENST00000678250.1;ENST00000678778.1;ENST00000679099.1;ENST00000679179.1	3UTR;CDS	67	56	63	11		98	77	42	4
chr6	32980895	32980896	bulges	+	chr6:32980862-32980895:+	FALSE	5'- GGGAGGGATGCAGGGACATTTACTGAAGGAGGGACATGGACAA -3' rG4seq-K ---------------------------------*---------	BRD2|ENSG00000204256.14	ENST00000374825.9;ENST00000374831.8;ENST00000395287.5;ENST00000449025.5;ENST00000449085.4;ENST00000463639.2;ENST00000469132.2;ENST00000482914.5;ENST00000677085.1;ENST00000678250.1;ENST00000679099.1;ENST00000679179.1	3UTR	45	25	49	3		77	47	45	2
chr6	32980988	32980990	canonical/G3L1-7	+	chr6:32980970-32980989:+	FALSE	5'- GGGGCAGGGCAAGGGTGGGAGTGTGCAAA -3' rG4seq-K ------------------**---------	BRD2|ENSG00000204256.14	ENST00000374825.9;ENST00000374831.8;ENST00000395287.5;ENST00000449025.5;ENST00000449085.4;ENST00000463639.2;ENST00000469132.2;ENST00000482914.5;ENST00000677085.1;ENST00000678250.1;ENST00000679099.1;ENST00000679179.1	3UTR	150	119	75	5		187	139	69	3
chr6	32981113	32981115	bulges	+	chr6:32981087-32981115:+	FALSE	5'- GCTAGGTAAGGCTGGGGGGAGGGTGGGGCCGTGGTCCC -3' rG4seq-K --------------------------**----------	BRD2|ENSG00000204256.14	ENST00000374825.9;ENST00000374831.8;ENST00000395287.5;ENST00000449025.5;ENST00000449085.4;ENST00000463639.2;ENST00000469132.2;ENST00000482914.5;ENST00000678250.1	3UTR	131	72	45	9		169	109	49	7
chr6	32981153	32981156	two-quartet	+	chr6:32981137-32981155:+	FALSE	5'- GGGGAGGGAAGAAGGGGGAGCTCTTTTT -3' rG4seq-K ----------------***---------	BRD2|ENSG00000204256.14	ENST00000374825.9;ENST00000374831.8;ENST00000395287.5;ENST00000449025.5;ENST00000449085.4;ENST00000463639.2;ENST00000469132.2;ENST00000482914.5;ENST00000678250.1	3UTR	175	42	156	3		204	57	154	4
chr6	33202636	33202637	bulges	+	chr6:33202610-33202638:+	FALSE	5'- GAGGGGTTCAGAAGAGGCGAGGAGGGAGCACAGTACCC -3' rG4seq-K --------------------------*-----------	SLC39A7|ENSG00000112473.18	ENST00000374675.7;ENST00000374677.8;ENST00000444757.5;ENST00000463972.1	CDS	36	29	21	5		28	23	18	6
chr6	33204315	33204316	canonical/G3L1-7	+	chr6:33204289-33204315:+	FALSE	5'- GGGAGTGATTGGGGGGATGGGGTGGGAGAGGGTTAG -3' rG4seq-K --------------------------*---------	SLC39A7|ENSG00000112473.18	ENST00000374675.7;ENST00000374677.8;ENST00000463972.1	3UTR	47	43	20	4		64	56	11	0
chr6	33204320	33204322	canonical/G3L1-7	+	chr6:33204289-33204321:+	FALSE	5'- GGGAGTGATTGGGGGGATGGGGTGGGAGAGGGTTAGTTGGTA -3' rG4seq-K -------------------------------**---------	SLC39A7|ENSG00000112473.18	ENST00000374675.7;ENST00000374677.8;ENST00000463972.1	3UTR	161	53	45	3		227	73	27	1
chr6	36594425	36594426	two-quartet	+	chr6:36594397-36594425:+	FALSE	5'- GGTTGGTGTTGGGCCGGAGGAAAGCGGGAAGACTCATC -3' rG4seq-K ----------------------------*---------	SRSF3|ENSG00000112081.17	ENST00000339436.11;ENST00000373715.11;ENST00000477442.6;ENST00000613941.4;ENST00000620242.1	5UTR	38	14	30	3		59	21	27	3
chr6	37174389	37174391	canonical/G3L1-7	+	chr6:37174368-37174390:+	FALSE	5'- GGGGGTGGGGGGTGGGGGTGGGTCAGAACCCT -3' rG4seq-K ---------------------**---------	PIM1|ENSG00000137193.14	ENST00000373509.6	3UTR	49	25	13	1		55	29	17	2
chr6	38153685	38153687	canonical/G3L1-7	+	chr6:38153667-38153686:+	FALSE	5'- GGGGAAGGGTGGGGGTGGGCCTGGTTGCC -3' rG4seq-K ------------------**---------	ZFAND3|ENSG00000156639.12	ENST00000287218.9;ENST00000373391.6	3UTR	99	63	23	2		100	61	23	2
chr6	38153743	38153744	two-quartet	+	chr6:38153722-38153743:+	FALSE	5'- GGTGGGGCTGGGGCTGGGTGGACAGGATCAG -3' rG4seq-K ---------------------*---------	ZFAND3|ENSG00000156639.12	ENST00000287218.9;ENST00000373391.6	3UTR	13	9	11	1		26	14	6	0
chr6	38154391	38154393	canonical/G3L1-7	+	chr6:38154373-38154393:+	FALSE	5'- GGGGGGGGTGGGGGGTGGGGCTTGTTCCCC -3' rG4seq-K ------------------**----------	ZFAND3|ENSG00000156639.12	ENST00000287218.9;ENST00000373391.6	3UTR	78	44	27	3		100	50	32	0
chr6	43179312	43179313	bulges	+	chr6:43179278-43179312:+	FALSE	5'- GGGCCGCAGGAGGGAGGCGGGGAGGAGGAACGGGCAGCCACAGG -3' rG4seq-K ----------------------------------*---------	SRF|ENSG00000112658.8	ENST00000265354.6	3UTR	45	38	17	0		40	34	12	0
chr6	63580943	63580944	longloop	+	chr6:63580915-63580945:+	FALSE	5'- GGGAGGGCCTGAGAAAAGAATGGGAGGGGGCTATTAATTA -3' rG4seq-K ----------------------------*-----------	ENSG00000285976|ENSG00000285976.2;PTP4A1|ENSG00000112245.13	ENST00000370651.7;ENST00000626021.3;ENST00000648894.1;ENST00000672924.1;ENST00000673199.1;ENST00000673217.1	3UTR	70	60	25	2		82	72	15	2
chr7	1530754	1530757	longloop	+	chr7:1530711-1530755:+	FALSE	5'- GGGGAGCCGGGCGGGCGGGTGCGGTGGCGGCGGGCGGCGCGGGGGCACTTGTTG -3' rG4seq-K -------------------------------------------***--------	MAFK|ENSG00000198517.10	ENST00000343242.9	5UTR	115	34	60	0		178	42	62	3
chr7	1538271	1538272	bulges	+	chr7:1538247-1538270:+	FALSE	5'- GAGGACGGCGGGGGCGGCGGCGGGGACGACTCC -3' rG4seq-K ------------------------*--------	MAFK|ENSG00000198517.10	ENST00000343242.9;ENST00000403150.5	5UTR	11	6	11	0		19	11	7	0
chr7	1540428	1540429	canonical/G3L1-7	+	chr7:1540406-1540430:+	FALSE	5'- GGGCGGCGGGCAGGCGGGTGGGGGCACACCCCTC -3' rG4seq-K ----------------------*-----------	MAFK|ENSG00000198517.10	ENST00000343242.9;ENST00000403150.5	3UTR	32	13	14	1		37	22	18	1
chr7	1541084	1541085	longloop	+	chr7:1541043-1541085:+	FALSE	5'- GGGCTGAGGGGGTGCAGCTTGCTGGTGTTCACTGGGGGAGGGCCTGTGGGCA -3' rG4seq-K -----------------------------------------*----------	MAFK|ENSG00000198517.10	ENST00000343242.9;ENST00000403150.5	3UTR	10	6	11	0		14	9	9	1
chr7	1541370	1541371	bulges	+	chr7:1541333-1541371:+	FALSE	5'- GGGGGAACGAGGAGGTCTTTTGGGGGCCTGGCGAGGGGAAGGGCTGCT -3' rG4seq-K -------------------------------------*----------	MAFK|ENSG00000198517.10	ENST00000343242.9;ENST00000403150.5	3UTR	11	6	9	0		12	8	9	1
chr7	1541480	1541482	bulges	+	chr7:1541446-1541483:+	FALSE	5'- GGAGGACGTTGCGTGGAGTGGTGGGAGGAGGCGGGAGCCGTGTGCGA -3' rG4seq-K ----------------------------------**-----------	MAFK|ENSG00000198517.10	ENST00000343242.9;ENST00000403150.5	3UTR	94	51	20	0		140	74	26	0
chr7	1541591	1541592	bulges	+	chr7:1541575-1541591:+	FALSE	5'- GGGCGCGGCGGGTGGGGAGGCAGCAG -3' rG4seq-K ----------------*---------	MAFK|ENSG00000198517.10	ENST00000343242.9;ENST00000403150.5	3UTR	80	75	14	4		102	97	14	3
chr7	44212716	44212718	longloop	+	chr7:44212679-44212717:+	FALSE	5'- GGGGGGTGGGGAGTCCCTGATGCTAGGGCTGGGGTGGGTGGAGTTTGA -3' rG4seq-K -------------------------------------**---------	YKT6|ENSG00000106636.9	ENST00000223369.3;ENST00000421621.3;ENST00000478411.2;ENST00000496112.5;ENST00000677436.1;ENST00000677851.1;ENST00000678359.1;ENST00000678497.1;ENST00000679020.1;ENST00000679209.1;ENST00000679310.1	3UTR	85	52	32	3		80	45	25	2
chr7	44213006	44213007	canonical/G3L1-7	+	chr7:44212983-44213006:+	FALSE	5'- GGGCGGGGAGTGTGTGGGTTGGGTTCGTACCAG -3' rG4seq-K -----------------------*---------	YKT6|ENSG00000106636.9	ENST00000223369.3;ENST00000421621.3;ENST00000478411.2;ENST00000677436.1;ENST00000677851.1;ENST00000678359.1;ENST00000678497.1;ENST00000679020.1;ENST00000679209.1;ENST00000679310.1	3UTR	56	51	11	1		91	82	9	0
chr7	73831929	73831930	two-quartet	+	chr7:73831905-73831930:+	FALSE	5'- GGAGGGCCCTGCCACGGGCCACTGGCTGCTGGGGA -3' rG4seq-K ------------------------*----------	CLDN4|ENSG00000189143.10	ENST00000340958.4;ENST00000431918.1;ENST00000435050.1	3UTR	41	10	91	4		82	20	76	3
chr7	73832100	73832103	two-quartet	+	chr7:73832066-73832100:+	FALSE	5'- GGGGAGGGACGGAAGTGACAGGGTGTGGTGGTGGAGTGGGGAGC -3' rG4seq-K ----------------------------------***-------	CLDN4|ENSG00000189143.10	ENST00000340958.4;ENST00000431918.1;ENST00000435050.1	3UTR	136	17	221	5		154	20	184	5
chr7	73832105	73832108	bulges	+	chr7:73832087-73832109:+	FALSE	5'- GGTGTGGTGGTGGAGTGGGGAGCTGGCTTCTG -3' rG4seq-K ------------------***-----------	CLDN4|ENSG00000189143.10	ENST00000340958.4;ENST00000431918.1;ENST00000435050.1	3UTR	765	385	225	22		1012	497	215	21
chr7	73832357	73832358	bulges	+	chr7:73832330-73832358:+	FALSE	5'- GTGGATGGACGGGTTTAGAGGGGAGGGGCGAAGGTGCT -3' rG4seq-K ---------------------------*----------	CLDN4|ENSG00000189143.10	ENST00000340958.4;ENST00000431918.1;ENST00000435050.1	3UTR	225	164	79	13		259	197	103	24
chr7	73832398	73832401	bulges	+	chr7:73832380-73832401:+	FALSE	5'- GGGCAGTGGTGGGGGAGGGGGCCAGAGAGGC -3' rG4seq-K ------------------***----------	CLDN4|ENSG00000189143.10	ENST00000340958.4;ENST00000431918.1;ENST00000435050.1	3UTR	760	317	233	9		954	399	183	6
chr7	73832551	73832553	canonical/G3L1-7	+	chr7:73832530-73832553:+	FALSE	5'- GGGAGGGTGGCAGGGAGGAGGGGACAGCTTCAC -3' rG4seq-K ---------------------**----------	CLDN4|ENSG00000189143.10	ENST00000340958.4;ENST00000431918.1;ENST00000435050.1	3UTR	407	166	337	19		532	240	266	6
chr7	74196191	74196192	bulges	+	chr7:74196164-74196193:+	FALSE	5'- GGGCCAAGGCGCTTTGGGGGTGGAGGGGGTGGTGCTGGT -3' rG4seq-K ---------------------------*-----------	EIF4H|ENSG00000106682.16	ENST00000265753.13;ENST00000353999.6;ENST00000495187.2;ENST00000677570.1;ENST00000677681.1;ENST00000677998.1;ENST00000678438.1;ENST00000678815.1;ENST00000679161.1;ENST00000679266.1;ENST00000679287.1	3UTR	9	5	20	1		18	9	19	1
chr7	74196196	74196197	two-quartet	+	chr7:74196171-74196196:+	FALSE	5'- GGCGCTTTGGGGGTGGAGGGGGTGGTGCTGGTGCT -3' rG4seq-K -------------------------*---------	EIF4H|ENSG00000106682.16	ENST00000265753.13;ENST00000353999.6;ENST00000495187.2;ENST00000677570.1;ENST00000677681.1;ENST00000677998.1;ENST00000678438.1;ENST00000678815.1;ENST00000679161.1;ENST00000679266.1;ENST00000679287.1	3UTR	85	67	31	2		105	72	24	0
chr7	99394548	99394550	canonical/G3L1-7	+	chr7:99394524-99394549:+	FALSE	5'- GGGGAAGCGGGGAGAGGGGTCAGGGAGGCTAATGG -3' rG4seq-K ------------------------**---------	ARPC1B|ENSG00000130429.15;ENSG00000284292|ENSG00000284292.1	ENST00000427217.6;ENST00000431816.6;ENST00000443222.6;ENST00000451682.5;ENST00000455009.6;ENST00000458033.6;ENST00000463078.1;ENST00000481997.5;ENST00000491294.1;ENST00000638617.1;ENST00000645391.1;ENST00000646101.2	3UTR	49	40	22	0		87	57	38	1
chr7	101161132	101161133	canonical/G3L1-7	+	chr7:101161108-101161132:+	FALSE	5'- GGGAAGGAAGGGTTGGGGGAAGGGCAAGCTTTAT -3' rG4seq-K ------------------------*---------	AP1S1|ENSG00000106367.15	ENST00000337619.11;ENST00000443943.5	3UTR	24	14	11	0		39	28	11	0
chr7	101161213	101161215	canonical/G3L1-7	+	chr7:101161197-101161215:+	FALSE	5'- GGGAGGGGTGGGGAGGGGGAGGGGGAAG -3' rG4seq-K ----------------**----------	AP1S1|ENSG00000106367.15	ENST00000337619.11;ENST00000443943.5	3UTR	27	13	27	1		36	20	22	0
chr7	101161220	101161222	canonical/G3L1-7	+	chr7:101161197-101161222:+	FALSE	5'- GGGAGGGGTGGGGAGGGGGAGGGGGAAGTGTCTGC -3' rG4seq-K -----------------------**----------	AP1S1|ENSG00000106367.15	ENST00000337619.11;ENST00000443943.5	3UTR	133	49	53	1		181	63	36	1
chr7	107761473	107761474	bulges	+	chr7:107761455-107761473:+	FALSE	5'- GGGTGGGTGGGTAGAAGGATAACAAAAT -3' rG4seq-K ------------------*---------	CBLL1|ENSG00000105879.12	ENST00000440859.8	3UTR	17	16	6	1		7	6	6	0
chr7	127591646	127591648	canonical/G3L1-7	+	chr7:127591621-127591647:+	FALSE	5'- GGGAGGGGGAAGGTGAGGGCTTCGGGTGGTGCTATA -3' rG4seq-K -------------------------**---------	ARF5|ENSG00000004059.11;FSCN3|ENSG00000106328.10	ENST00000000233.10;ENST00000463733.5;ENST00000478328.1	3UTR;non_coding	91	42	15	0		138	64	38	2
chr7	128092222	128092224	canonical/G3L1-7	+	chr7:128092197-128092224:+	FALSE	5'- GGGTGGCATCGGGGCTGCGGGGTGGGGACCCCAAGGC -3' rG4seq-K -------------------------**----------	SND1|ENSG00000197157.11	ENST00000354725.8;ENST00000485871.1;ENST00000489417.5	3UTR	71	42	24	1		91	61	17	0
chr7	139423048	139423049	bulges	+	chr7:139423017-139423048:+	FALSE	5'- GTTCAGGATGTTCTAGGGGGTGGGGGCAGGGACTCTTTTCG -3' rG4seq-K -------------------------------*---------	LUC7L2|ENSG00000146963.18	ENST00000263545.7;ENST00000354926.9;ENST00000456182.5;ENST00000482860.1;ENST00000498518.1;ENST00000619796.4	3UTR	30	27	12	1		36	29	10	1
chr8	37699311	37699313	canonical/G3L1-7	+	chr8:37699280-37699312:+	FALSE	5'- GGGGGTGGAGGGGGCCACCTGGGTGGCAGGGGCCCTGGAGCT -3' rG4seq-K -------------------------------**---------	ZNF703|ENSG00000183779.7	ENST00000331569.6	3UTR	54	23	28	2		55	24	21	1
chr8	41621621	41621622	bulges	+	chr8:41621585-41621622:+	FALSE	5'- GGAAGAGGCCAGGTGGGCCGCTGACTGGGCCATGGGGAGAACGTGTG -3' rG4seq-K ------------------------------------*----------	GPAT4|ENSG00000158669.11	ENST00000396987.7	3UTR	13	7	8	0		15	8	7	0
chr8	66430643	66430644	two-quartet	+	chr8:66430627-66430644:+	FALSE	5'- GGGAGTGCGGGGGAGGGAAAGAAAACA -3' rG4seq-K ----------------*----------	ENSG00000285655|ENSG00000285655.1;RRS1|ENSG00000179041.4	ENST00000320270.4;ENST00000523113.5	3UTR;non_coding	16	13	7	0		18	15	11	0
chr8	119208438	119208439	bulges	+	chr8:119208406-119208440:+	FALSE	5'- GGAGCCCGGGAGGCGGAGGCGGGAGGCGGCGGCGGCGCGCGGAG -3' rG4seq-K --------------------------------*-----------	MAL2|ENSG00000147676.14	ENST00000522112.6;ENST00000534619.5;ENST00000614891.5	5UTR	39	13	27	0		82	22	24	0
chr8	127736190	127736191	bulges	+	chr8:127736168-127736190:+	FALSE	5'- GGGAAAAAGAACGGAGGGAGGGATCGCGCTGA -3' rG4seq-K ----------------------*---------	MYC|ENSG00000136997.21	ENST00000259523.10;ENST00000377970.6;ENST00000517291.2;ENST00000641036.1;ENST00000651626.1	5UTR;CDS	24	17	10	1		22	14	10	0
chr9	34251899	34251900	canonical/G3L1-7	+	chr9:34251873-34251899:+	FALSE	5'- GGGGCTGGGGAGATGGGGCGGGAGGGCCAGACTCAG -3' rG4seq-K --------------------------*---------	UBAP1|ENSG00000165006.14	ENST00000297661.9;ENST00000359544.2;ENST00000379186.8	3UTR	29	18	9	0		43	22	7	0
chr9	36211976	36211977	bulges	+	chr9:36211954-36211976:+	FALSE	5'- GAGGAGGGAGAGGAGGAAGAGGAAGGGGAGGG -3' rG4seq-K ----------------------*---------	CLTA|ENSG00000122705.17	ENST00000242285.10;ENST00000345519.10;ENST00000396603.6;ENST00000433436.6;ENST00000464497.5;ENST00000470744.5;ENST00000493185.2;ENST00000538225.5;ENST00000540080.5	3UTR	14	10	21	2		21	12	16	2
chr9	36211985	36211987	bulges	+	chr9:36211959-36211986:+	FALSE	5'- GGGAGAGGAGGAAGAGGAAGGGGAGGGAAGCTTCCCA -3' rG4seq-K --------------------------**---------	CLTA|ENSG00000122705.17	ENST00000242285.10;ENST00000345519.10;ENST00000396603.6;ENST00000433436.6;ENST00000464497.5;ENST00000470744.5;ENST00000493185.2;ENST00000538225.5;ENST00000540080.5	3UTR	90	39	50	1		110	43	34	0
chr9	98005147	98005148	bulges	+	chr9:98005116-98005147:+	FALSE	5'- GAGGTGGATGGTGTGGATGAAGAGGAGGAGGACGAAGGTGA -3' rG4seq-K -------------------------------*---------	ANP32B|ENSG00000136938.9	ENST00000339399.5;ENST00000473205.1;ENST00000486769.1	CDS	23	13	17	2		21	14	17	3
chr9	98056853	98056854	canonical/G3L1-7	+	chr9:98056835-98056853:+	FALSE	5'- GGGCGCTGGGTGGGCGGGCAACACCCGT -3' rG4seq-K ------------------*---------	NANS|ENSG00000095380.11	ENST00000210444.6;ENST00000480925.1;ENST00000495319.1	CDS	60	48	6	0		59	48	9	1
chr9	107324928	107324932	bulges	+	chr9:107324893-107324931:+	FALSE	5'- GGTGGTCAAGGAGGAGGAGGTGGAGGTGGCAGTGGAGGAATTGCAGAA -3' rG4seq-K -----------------------------------*-**---------	RAD23B|ENSG00000119318.13	ENST00000358015.8;ENST00000416373.6;ENST00000457811.1	CDS	177	69	91	6		257	81	85	7
chr9	107329791	107329793	canonical/G3L1-7	+	chr9:107329774-107329792:+	FALSE	5'- GGGGGTGGGGAGGGAGGGATCTAGGATA -3' rG4seq-K -----------------**---------	RAD23B|ENSG00000119318.13	ENST00000358015.8;ENST00000416373.6;ENST00000457811.1	3UTR	118	115	55	15		139	131	35	3
chr9	107330235	107330238	canonical/G3L1-7	+	chr9:107330216-107330237:+	FALSE	5'- GGGGTGGGAGGGGAGAAAGGGAACCTTTTCT -3' rG4seq-K -------------------***---------	RAD23B|ENSG00000119318.13	ENST00000358015.8;ENST00000416373.6;ENST00000457811.1	3UTR	243	127	124	2		258	157	102	2
chr9	111933871	111933872	bulges	+	chr9:111933854-111933871:+	FALSE	5'- GGGGGGGTTGGGAGTGGTTTCATTTTA -3' rG4seq-K -----------------*---------	UGCG|ENSG00000148154.10	ENST00000374279.4	3UTR	19	15	9	1		28	24	11	0
chr9	127807456	127807457	bulges	+	chr9:127807086-127807087:+,chr9:127807420-127807455:+	TRUE	5'- GGTGGACCTGGCAGTGGTGGAGGTGGGCATTGGCGGGGCTTATGAC -3' rG4seq-K -------------------------------------*--------	FPGS|ENSG00000136877.15	ENST00000373225.7;ENST00000373228.5;ENST00000373247.7;ENST00000393706.6;ENST00000423577.1;ENST00000431857.5;ENST00000460181.5;ENST00000475765.5;ENST00000479147.6;ENST00000479375.6;ENST00000481552.6;ENST00000488307.5;ENST00000496586.5;ENST00000497386.5;ENST00000630236.2	CDS	7	5	6	0		22	15	7	1
chr9	128160468	128160469	bulges	+	chr9:128160439-128160468:+	FALSE	5'- GGTGGAGGCGGGAGCGGAAGGCGAGGAGGACGGCTTCGG -3' rG4seq-K -----------------------------*---------	BBLN|ENSG00000171159.5	ENST00000372994.2;ENST00000486420.1;ENST00000489240.1;ENST00000492588.1	CDS	32	19	10	1		44	34	8	0
chr9	128288896	128288898	bulges	+	chr9:128288862-128288899:+	FALSE	5'- GGAGGCTAGAGAAGAGGCGGGCAGGGAGGAAGGGGCGTTCCCAGCTC -3' rG4seq-K ----------------------------------**-----------	SWI5|ENSG00000175854.14	ENST00000372898.6;ENST00000418976.2;ENST00000608796.6;ENST00000652598.1	3UTR	20	11	14	1		14	10	12	1
chr9	128689255	128689256	bulges	+	chr9:128689232-128689255:+	FALSE	5'- GGAGGAGGTGGAGGAGGAGGCGGCTCGGGAGAG -3' rG4seq-K -----------------------*---------	SET|ENSG00000119335.18	ENST00000322030.13;ENST00000372692.8;ENST00000409104.7;ENST00000686568.1;ENST00000686840.1;ENST00000691158.1	5UTR	41	33	9	0		33	28	10	0
chr9	129148309	129148310	longloop	+	chr9:129148280-129148310:+	FALSE	5'- GGGAGGGGATGGCAGAAACTCAGGGAGGGGCTTGGGGCCC -3' rG4seq-K -----------------------------*----------	ENSG00000235007|ENSG00000235007.3;PTPA|ENSG00000119383.21	ENST00000337738.6;ENST00000347048.8;ENST00000348141.9;ENST00000355007.7;ENST00000357197.8;ENST00000358994.9;ENST00000393370.7;ENST00000414510.5;ENST00000452489.6;ENST00000674559.1;ENST00000674648.1	3UTR;non_coding	14	10	7	1		14	10	8	0
chr9	130501226	130501227	longloop	+	chr9:130501199-130501228:+	FALSE	5'- GGGAAGGGTGGGGGGCAGCTGCGGTGGGGAGCTATAAAA -3' rG4seq-K ---------------------------*-----------	ASS1|ENSG00000130707.18	ENST00000352480.10;ENST00000372393.7;ENST00000372394.5	3UTR	141	127	22	0		183	162	25	2
chr9	130637635	130637637	longloop	+	chr9:130637610-130637636:+	FALSE	5'- GGGGTTGGGAGGGGCATTTTGTAGGGTTTGTATAAT -3' rG4seq-K -------------------------**---------	FUBP3|ENSG00000107164.16	ENST00000319725.10;ENST00000650723.1	3UTR	33	25	20	0		20	15	16	0
chr9	137242660	137242661	canonical/G3L1-7	+	chr9:137242638-137242661:+	FALSE	5'- GGGGGGACTGGGTCTGGGATGGGTACCCTCCTC -3' rG4seq-K ----------------------*----------	TUBB4B|ENSG00000188229.6	ENST00000340384.5;ENST00000604929.1	CDS	45	12	33	1		48	19	27	0
chr9	137243545	137243546	bulges	+	chr9:137243513-137243547:+	FALSE	5'- GGAGGGCGAGTTCGAGGAGGAGGCTGAGGAGGAGGTGGCCTAGA -3' rG4seq-K --------------------------------*-----------	TUBB4B|ENSG00000188229.6	ENST00000340384.5;ENST00000604929.1	CDS	46	20	63	4		72	30	60	1
chr9	137243548	137243549	bulges	+	chr9:137243513-137243551:+	FALSE	5'- GGAGGGCGAGTTCGAGGAGGAGGCTGAGGAGGAGGTGGCCTAGAGCCT -3' rG4seq-K -----------------------------------*------------	TUBB4B|ENSG00000188229.6	ENST00000340384.5;ENST00000604929.1	CDS	82	31	62	0		109	28	58	0
chr9	137243551	137243552	bulges	+	chr9:137243513-137243551:+	FALSE	5'- GGAGGGCGAGTTCGAGGAGGAGGCTGAGGAGGAGGTGGCCTAGAGCCT -3' rG4seq-K --------------------------------------*---------	TUBB4B|ENSG00000188229.6	ENST00000340384.5;ENST00000604929.1	CDS	137	46	60	1		163	51	62	3
chrM	901	902	potential G-triplex & G>=40%	+	chrM:842-902:+	FALSE	5'- GAAAGTTTAACTAAGCTATACTAACCCCAGGGTTGGTCAATTTCGTGCCAGCCACCGCGGTCACACGATT -3' rG4seq-K -----------------------------------------------------------*----------	MT-RNR1|ENSG00000211459.2	ENST00000389680.2	non_coding	87	40	249	44		56	27	174	28
chrX	11111378	11111379	bulges	+	chrX:11111349-11111380:+	FALSE	5'- GAGGAAGGCGGCGGCGGCGGCGGCGGCGGCGTGAAGTCACT -3' rG4seq-K -----------------------------*-----------	HCCS|ENSG00000004961.15	ENST00000321143.8;ENST00000380762.5;ENST00000380763.7	5UTR	18	11	8	0		20	13	6	0
chrX	47193960	47193961	bulges	+	chrX:47193928-47193963:+	FALSE	5'- GGCGGCGGGGAGGAGGAGAAGGAGGAGGGTGGCGGCCGGGCTTGG -3' rG4seq-K --------------------------------*------------	UBA1|ENSG00000130985.17	ENST00000335972.11;ENST00000377351.8;ENST00000412206.5;ENST00000427561.5;ENST00000442035.5;ENST00000457753.5	5UTR	38	14	13	0		41	11	15	0
chrX	48576529	48576531	bulges	+	chrX:48576416-48576419:+,chrX:48576507-48576530:+	TRUE	5'- GAGGTGGTGGGGACCAGGGCTATGGGAGTGGCAGGT -3' rG4seq-K -------------------------**---------	RBM3|ENSG00000102317.18	ENST00000354480.2;ENST00000376755.1;ENST00000376759.8;ENST00000466764.5;ENST00000472897.5;ENST00000488216.5;ENST00000489344.5;ENST00000490127.5	CDS	79	23	46	3		92	20	53	2
chrX	71300237	71300240	bulges	+	chrX:71300216-71300242:+	FALSE	5'- GGAGGCAGAGGGCAAGGGAGGGGTGGTATTAAACAA -3' rG4seq-K ---------------------*-*------------	NONO|ENSG00000147140.17	ENST00000276079.13;ENST00000373841.5;ENST00000420903.6;ENST00000472185.1;ENST00000473525.2;ENST00000474431.5;ENST00000490044.5;ENST00000535149.5;ENST00000676495.1;ENST00000676499.1;ENST00000676797.1;ENST00000677014.1;ENST00000677218.1;ENST00000677245.1;ENST00000677274.1;ENST00000677446.1;ENST00000677612.1;ENST00000677766.1;ENST00000677826.1;ENST00000677879.1;ENST00000677977.1;ENST00000678231.1;EN…	3UTR	63	25	43	3		38	20	18	1
chrX	154381288	154381290	canonical/G3L1-7	+	chrX:154381266-154381289:+	FALSE	5'- GGGGGTGGGGGTGGGGGCAGGGGCAGGGGCTTT -3' rG4seq-K ----------------------**---------	EMD|ENSG00000102119.12	ENST00000369835.3;ENST00000369842.9;ENST00000428228.5;ENST00000471965.1;ENST00000486738.5;ENST00000492448.1;ENST00000682114.1;ENST00000682478.1;ENST00000683576.1;ENST00000683627.1;ENST00000684082.1;ENST00000684633.1;ENST00000684678.1	3UTR	19	10	18	2		63	28	12	0
NC_006213.1	824	825	potential G-triplex & G>=40%	+	NC_006213.1:765-825:+	FALSE	5'- TGGTCGTTGCACTGTTAATAAGCATGTGGCCTATCAGTTATATATGATTGATCCTGCAGGTGTCTGTCTT -3' rG4seq-K -----------------------------------------------------------*----------	NA	NA	NA	1405	89	3368	123		1494	87	1879	55
NC_006213.1	1242	1243	potential G-quadruplex & G>=40%	+	NC_006213.1:1183-1243:+	FALSE	5'- ATGAAGGCATTATTTCCTACTTGGAGTCAGGAACTCCTTTTTGATGTAATTGTGGCATGGCATGTTGTGC -3' rG4seq-K -----------------------------------------------------------*----------	NA	NA	NA	1169	156	2674	207		1501	215	1890	142
NC_006213.1	17256	17257	two-quartet	+	NC_006213.1:17240-17257:+	FALSE	5'- GGCCAAGGTCAGGGTGGAGTGCTATGA -3' rG4seq-K ----------------*----------	NA	NA	NA	107	40	148	21		97	21	103	5
NC_006213.1	23923	23924	potential G-triplex & G>=40%	+	NC_006213.1:23864-23924:+	FALSE	5'- ATAAAGACACCGGTCCTCCTCCTATAAGTACTGATACTGTTGATGTTACTAATGGTTTGGGTACTTATTA -3' rG4seq-K -----------------------------------------------------------*----------	NA	NA	NA	368	51	689	28		411	73	381	18
NC_006213.1	26718	26719	potential G-quadruplex & G>=40%	+	NC_006213.1:26659-26719:+	FALSE	5'- GGATACACTTTGGCTGCCACCTCTGCTAGTCTATTTCCTCCTTGGACAGCAGCAGCAGGTGTACCATTTT -3' rG4seq-K -----------------------------------------------------------*----------	NA	NA	NA	164	37	369	34		167	34	258	22
NC_006213.1	27942	27943	potential G-triplex & G>=40%	+	NC_006213.1:27883-27943:+	FALSE	5'- TTTTTGCAATCTAGCATTTGTTAAAGTTCTTAAGGCCACGCCCTATTAATGGACATTTGGAGACCTGAGA -3' rG4seq-K -----------------------------------------------------------*----------	NA	NA	NA	849	106	1896	92		849	100	1155	58
NC_006213.1	29179	29180	potential G-quadruplex & G>=40%	+	NC_006213.1:29120-29180:+	FALSE	5'- ATGTTAAGTCCAAAGTCGGTAATTACCGACTGCCATCAACCCAAAAGGGTTCTGGCATGGACACCGCATT -3' rG4seq-K -----------------------------------------------------------*----------	NA	NA	NA	2685	181	5940	152		2991	225	4996	117
NC_006213.1	29512	29513	potential G-quadruplex & G>=40%	+	NC_006213.1:29453-29513:+	FALSE	5'- AGTTTGTAGAAGGACAAGGTGTGCCTATTGCACCAGGAGTCCCAGCTACTGAAGCTAAGGGGTACTGGTA -3' rG4seq-K -----------------------------------------------------------*----------	NA	NA	NA	4903	638	10841	443		5460	759	7794	382
NC_006213.1	29633	29634	potential G-quadruplex & G>=40%	+	NC_006213.1:29574-29634:+	FALSE	5'- GCTGCCACGATGGTATTTTTACTATCTGGGAACAGGACCGCATGCTAAAGACCAGTACGGCACCGATATT -3' rG4seq-K -----------------------------------------------------------*----------	NA	NA	NA	5717	683	11017	717		6101	649	8798	568
NC_006213.1	29728	29729	potential G-quadruplex & G>=40%	+	NC_006213.1:29669-29729:+	FALSE	5'- ACCAGGCTGATGTCAATACCCCGGCTGACATTGTCGATCGGGACCCAAGTAGCGATGAGGCTATTCCGAC -3' rG4seq-K -----------------------------------------------------------*----------	NA	NA	NA	4870	494	9306	322		5876	642	7398	274
chr1	1336434	1336435	bulges	-	chr1:1336433-1336463:-	FALSE	5'- GAAGGAGCGTCGGGCGGCGGGAGCTGGGGGCAGTGGCAGT -3' rG4seq-K ----------------------------*-----------	DVL1|ENSG00000107404.21	ENST00000378888.10;ENST00000378891.9;ENST00000632445.1	3UTR;CDS	9	7	8	0		7	4	14	0
chr1	1752910	1752911	bulges	-	chr1:1752908-1752936:-	FALSE	5'- GAGGAGGAGGAGGAGGAGGAGGAGGAGGGCTAGGTCAA -3' rG4seq-K -------------------------*------------	NADK|ENSG00000008130.15	ENST00000341426.9;ENST00000341991.7;ENST00000342348.9;ENST00000378625.5	CDS	38	21	8	1		45	22	14	0
chr1	1785737	1785738	canonical/G3L1-7	-	chr1:1785738-1785770:-	FALSE	5'- GGGTGGGGAGGGAGAGAGAGGGAGGGAGAGGGAGTGAAGAGC -3' rG4seq-K --------------------------------*---------	GNB1|ENSG00000078369.18	ENST00000378609.9;ENST00000610897.4;ENST00000615252.4	3UTR	125	35	25	1		167	50	22	1
chr1	1785743	1785744	canonical/G3L1-7	-	chr1:1785744-1785770:-	FALSE	5'- GGGTGGGGAGGGAGAGAGAGGGAGGGAGAGGGAGTG -3' rG4seq-K --------------------------*---------	GNB1|ENSG00000078369.18	ENST00000378609.9;ENST00000610897.4;ENST00000615252.4	3UTR	70	43	24	2		98	67	17	2
chr1	1785747	1785749	bulges	-	chr1:1785749-1785770:-	FALSE	5'- GGGTGGGGAGGGAGAGAGAGGGAGGGAGAGG -3' rG4seq-K ---------------------**--------	GNB1|ENSG00000078369.18	ENST00000378609.9;ENST00000610897.4;ENST00000615252.4	3UTR	18	15	34	0		32	16	23	1
chr1	8012960	8012962	bulges	-	chr1:8012960-8012984:-	FALSE	5'- GATGGTGGGGAGGGGAGGATGGGGAAGCTTTTTA -3' rG4seq-K ----------------------**----------	ERRFI1|ENSG00000116285.13	ENST00000377482.10;ENST00000474874.5	3UTR	456	340	241	16		574	431	161	18
chr1	8012965	8012966	two-quartet	-	chr1:8012966-8012981:-	FALSE	5'- GGTGGGGAGGGGAGGATGGGGAAGC -3' rG4seq-K ---------------*---------	ERRFI1|ENSG00000116285.13	ENST00000377482.10;ENST00000474874.5	3UTR	44	16	112	9		56	20	67	6
chr1	16124568	16124569	longloop	-	chr1:16124569-16124599:-	FALSE	5'- GGGGGCCCCGCCAGGGCTGGGGACAGAGGGTGTCAAACAT -3' rG4seq-K ------------------------------*---------	EPHA2|ENSG00000142627.13	ENST00000358432.8	3UTR	32	21	19	1		39	24	13	1
chr1	16155957	16155960	canonical/G3L1-7	-	chr1:16155958-16155985:-	FALSE	5'- GGGTGTGCGGGAGCCGGGCTCGGGGGGATCGGACCGA -3' rG4seq-K -------------------------*-*---------	EPHA2|ENSG00000142627.13	ENST00000358432.8;ENST00000461614.1	5UTR	68	18	39	0		117	32	43	2
chr1	19338963	19338965	canonical/G3L1-7	-	chr1:19338963-19338983:-	FALSE	5'- GGGGTGGGGGCTGGGGGGGGTGCCGCCGAC -3' rG4seq-K ------------------**----------	CAPZB|ENSG00000077549.19	ENST00000264202.8;ENST00000264203.7;ENST00000375142.5	3UTR	64	47	16	2		99	62	18	0
chr1	19339050	19339051	canonical/G3L1-7	-	chr1:19339051-19339077:-	FALSE	5'- GGGGTTGGGGGTCGTGGGGACAGGGGACAGCTCTGG -3' rG4seq-K --------------------------*---------	CAPZB|ENSG00000077549.19	ENST00000264202.8;ENST00000264203.7;ENST00000375142.5	3UTR	41	25	14	2		47	27	9	1
chr1	19339057	19339059	longloop	-	chr1:19339058-19339088:-	FALSE	5'- GGGAGTTGCTTGGGGTTGGGGGTCGTGGGGACAGGGGACA -3' rG4seq-K -----------------------------**---------	CAPZB|ENSG00000077549.19	ENST00000264202.8;ENST00000264203.7;ENST00000375142.5	3UTR	13	10	22	0		21	10	16	0
chr1	20652220	20652222	potential G-quadruplex & G>=40%	-	chr1:20652220-20652280:-	FALSE	5'- TGGCACAACTTTACCTCTGTGGGAGATGCAACACTGAGAGCCAAGGGGTGGGAGTTGGGATAATTTTTAT -3' rG4seq-K ----------------------------------------------------------**----------	DDOST|ENSG00000244038.11	ENST00000415136.6;ENST00000602624.7	3UTR	52	19	74	8		56	26	55	4
chr1	20652328	20652332	two-quartet	-	chr1:20652329-20652351:-	FALSE	5'- GGAGACGGGGCAAGGAGGGGGGTTATTAGGAT -3' rG4seq-K -------------------*-**---------	DDOST|ENSG00000244038.11	ENST00000415136.6;ENST00000602624.7	3UTR	174	71	163	22		222	89	124	6
chr1	23310995	23310996	two-quartet	-	chr1:23310993-23311014:-	FALSE	5'- GGTCGGGGTCGTGGTGGGGGGAGAGGTGGAT -3' rG4seq-K ------------------*------------	HNRNPR|ENSG00000125944.21	ENST00000302271.11;ENST00000374612.5;ENST00000374616.7;ENST00000427764.3;ENST00000476660.1;ENST00000478691.5;ENST00000606561.5;ENST00000641107.1;ENST00000675048.1	CDS	22	12	14	0		23	13	16	1
chr1	32334005	32334006	two-quartet	-	chr1:32334006-32334026:-	FALSE	5'- GGCTTTGGGGTGGGGGGAGGTCTGTAATGT -3' rG4seq-K --------------------*---------	MARCKSL1|ENSG00000175130.7	ENST00000329421.8	3UTR	32	16	18	1		34	10	15	0
chr1	33010703	33010706	longloop	-	chr1:33010705-33010737:-	FALSE	5'- GGGTGAGGATGGTGAGGGAGGGCTGGTGAGGGGCTCAGAGGA -3' rG4seq-K -------------------------------***--------	AK2|ENSG00000004455.17	ENST00000354858.11;ENST00000373449.7;ENST00000482191.1;ENST00000491241.1;ENST00000548033.5;ENST00000629371.2;ENST00000672308.1;ENST00000672715.1	3UTR	135	55	41	1		168	76	26	2
chr1	35183779	35183780	bulges	-	chr1:35183780-35183814:-	FALSE	5'- GGGTGTAAGACAATTGGTAGGGGGTGAAAGTGGGTTTGATTAAA -3' rG4seq-K ----------------------------------*---------	SFPQ|ENSG00000116560.11	ENST00000357214.6;ENST00000460428.5;ENST00000470472.5	3UTR	18	9	20	0		31	14	15	0
chr1	35184559	35184561	bulges	-	chr1:35184560-35184578:-	FALSE	5'- GGGCAGGGAGGTGCGGGGCCTGTGGGTG -3' rG4seq-K -----------------**---------	SFPQ|ENSG00000116560.11	ENST00000357214.6;ENST00000460428.5;ENST00000470472.5	CDS	40	20	26	3		63	28	32	1
chr1	36136771	36136773	canonical/G3L1-7	-	chr1:36136772-36136799:-	FALSE	5'- GGGAGGAAGGGCTGGGAGGGAGTGGGGAGGAATTGCT -3' rG4seq-K --------------------------**---------	TRAPPC3|ENSG00000054116.12	ENST00000373166.8;ENST00000462715.1;ENST00000616074.4;ENST00000616395.4;ENST00000617904.4	3UTR	66	29	23	1		102	43	22	0
chr1	42926430	42926431	bulges	-	chr1:42926430-42926448:-	FALSE	5'- GGGAGGAGAGGGGAAGGGCCAGTCTGGG -3' rG4seq-K -----------------*----------	SLC2A1|ENSG00000117394.24	ENST00000426263.10;ENST00000630287.2;ENST00000674545.1;ENST00000674765.1;ENST00000675112.1;ENST00000676254.1	3UTR	46	25	6	0		49	36	18	0
chr1	43363462	43363463	canonical/G3L1-7	-	chr1:43363463-43363482:-	FALSE	5'- GGGTGGGCGGGGGCCTGGGAATACAGCCT -3' rG4seq-K -------------------*---------	ELOVL1|ENSG00000066322.15	ENST00000372458.8;ENST00000413844.3;ENST00000621943.4	3UTR	110	92	11	1		157	122	9	2
chr1	52684780	52684781	canonical/G3L1-7	-	chr1:52684781-52684799:-	FALSE	5'- GGGTGGGGGAGGGGAGGGAGGAATAATT -3' rG4seq-K ------------------*---------	COA7|ENSG00000162377.6	ENST00000371538.5	3UTR	29	28	6	2		27	26	6	3
chr1	53227008	53227010	bulges	-	chr1:53227009-53227041:-	FALSE	5'- GAATATTGGTGTGGACATGGGGGGTGGGTGGGAGTAGAAAAT -3' rG4seq-K -------------------------------**---------	MAGOH|ENSG00000162385.11	ENST00000371466.4;ENST00000371470.8;ENST00000495868.1	3UTR	58	42	16	2		66	47	19	1
chr1	54851295	54851296	longloop	-	chr1:54851295-54851333:-	FALSE	5'- GGGAGTGGGTCCGCGCTGCTCTGCAGCAGGGGCTGGGGAGTGGACAGC -3' rG4seq-K -------------------------------------*----------	DHCR24|ENSG00000116133.13	ENST00000371269.9;ENST00000436604.2;ENST00000535035.6;ENST00000647912.1;ENST00000648712.1;ENST00000648728.1;ENST00000649769.1	3UTR	16	13	7	0		21	19	9	2
chr1	58781717	58781719	bulges	-	chr1:58781716-58781734:-	FALSE	5'- GGGGGGAGGGGGAGGGGGTTACAAACTG -3' rG4seq-K ---------------**-----------	JUN|ENSG00000177606.8	ENST00000371222.4;ENST00000678696.1	3UTR	60	48	32	1		59	43	32	1
chr1	77978926	77978927	bulges	-	chr1:77978925-77978959:-	FALSE	5'- GGTGGCGGTGGTGGCGGCGGTGGTGGTGGAGGAGTTAACGACGC -3' rG4seq-K --------------------------------*-----------	FUBP1|ENSG00000162613.17	ENST00000294623.8;ENST00000370767.5;ENST00000370768.7;ENST00000421641.1	CDS	29	13	9	0		48	22	6	0
chr1	85708140	85708142	bulges	-	chr1:85708142-85708171:-	FALSE	5'- GGCGGAGGAGTTCGGCGGCGGAGAGGAGGGGACAGGGCT -3' rG4seq-K -----------------------------**--------	ZNHIT6|ENSG00000117174.11	ENST00000370574.4;ENST00000431532.6	CDS	18	8	16	0		10	7	14	0
chr1	110407612	110407613	bulges	-	chr1:110407611-110407639:-	FALSE	5'- GGAGTGGTCGGTGGGTGGGATGGAGGCGACCTTGGAGC -3' rG4seq-K --------------------------*-----------	LAMTOR5|ENSG00000134248.14	ENST00000256644.8;ENST00000464240.1;ENST00000474861.6;ENST00000483260.5;ENST00000531779.1;ENST00000602318.6	5UTR;CDS	43	15	14	0		53	28	12	0
chr1	110407619	110407621	bulges	-	chr1:110407620-110407651:-	FALSE	5'- GGGTTCTGAGCCGGAGTGGTCGGTGGGTGGGATGGAGGCGA -3' rG4seq-K ------------------------------**---------	LAMTOR5|ENSG00000134248.14	ENST00000256644.8;ENST00000464240.1;ENST00000474861.6;ENST00000483260.5;ENST00000531779.1;ENST00000602318.6	5UTR;CDS	34	22	13	2		26	17	15	2
chr1	114717068	114717069	longloop	-	chr1:114717069-114717097:-	FALSE	5'- GGGTCAGCTCAGGGGATGTGGGGGAGGGCGGTTTTATC -3' rG4seq-K ----------------------------*---------	CSDE1|ENSG00000009307.17	ENST00000339438.10;ENST00000358528.9;ENST00000438362.7;ENST00000483030.2;ENST00000529046.6;ENST00000610726.5;ENST00000684913.1;ENST00000685676.1;ENST00000686025.1;ENST00000686123.1;ENST00000686235.1;ENST00000686581.1;ENST00000686667.1;ENST00000686781.1;ENST00000687548.1;ENST00000687759.1;ENST00000688211.1;ENST00000688611.1;ENST00000689217.1;ENST00000689510.1;ENST00000689573.1;ENST00000689631.1;EN…	3UTR	35	30	13	1		37	30	8	1
chr1	150265502	150265504	canonical/G3L1-7	-	chr1:150265502-150265522:-	FALSE	5'- GGGGTGTGGGAGGGGCGGGGAGGTTTTCTA -3' rG4seq-K ------------------**----------	APH1A|ENSG00000117362.13	ENST00000360244.8;ENST00000369109.8;ENST00000414276.6	3UTR	38	23	24	1		50	38	12	0
chr1	150574890	150574891	bulges	-	chr1:150574888-150574921:-	FALSE	5'- GGGGAGTGGTGGGTTTATAGGGGGAGGAGGAGGCAGGTGGTCT -3' rG4seq-K ------------------------------*------------	MCL1|ENSG00000143384.14	ENST00000369026.3;ENST00000464132.2;ENST00000620947.4;ENST00000676522.1;ENST00000678610.1;ENST00000678770.1	3UTR	126	32	79	7		138	19	64	1
chr1	150574893	150574894	bulges	-	chr1:150574892-150574921:-	FALSE	5'- GGGGAGTGGTGGGTTTATAGGGGGAGGAGGAGGCAGGTG -3' rG4seq-K ---------------------------*-----------	MCL1|ENSG00000143384.14	ENST00000369026.3;ENST00000464132.2;ENST00000620947.4;ENST00000676522.1;ENST00000678610.1;ENST00000678770.1	3UTR	91	23	70	3		117	20	64	0
chr1	150574896	150574899	longloop	-	chr1:150574898-150574933:-	FALSE	5'- GGGAAAGGAGGAGGGGAGTGGTGGGTTTATAGGGGGAGGAGGAGG -3' rG4seq-K ----------------------------------***--------	MCL1|ENSG00000143384.14	ENST00000369026.3;ENST00000464132.2;ENST00000620947.4;ENST00000676522.1;ENST00000678610.1;ENST00000678770.1	3UTR	161	35	189	7		248	58	186	9
chr1	153534676	153534677	potential G-quadruplex & G>=40%	-	chr1:153534676-153534736:-	FALSE	5'- GGGCCTTGGCTTTGATCTACAATGAAGCCCTCAAGGGCTGAAAATAAATAGGGAAGATGGAGACACCCTC -3' rG4seq-K -----------------------------------------------------------*----------	S100A6|ENSG00000197956.10	ENST00000368719.9;ENST00000368720.6;ENST00000462776.2;ENST00000496817.5	3UTR;CDS	140	37	291	19		164	43	189	13
chr1	153613076	153613077	canonical/G3L1-7	-	chr1:153613077-153613094:-	FALSE	5'- GGGCAGGGCTGGGAGGGAGTGGGACAG -3' rG4seq-K -----------------*---------	S100A16|ENSG00000188643.11	ENST00000368706.9;ENST00000474991.1	5UTR	44	40	17	0		66	61	14	1
chr1	153614368	153614371	canonical/G3L1-7	-	chr1:153614369-153614396:-	FALSE	5'- GGGGAGGAGGGAGAGCAGGGTTGGGGGAGAGGCTGAG -3' rG4seq-K -------------------------***---------	S100A14|ENSG00000189334.9	ENST00000344616.4;ENST00000368701.5;ENST00000368702.5;ENST00000476873.5	3UTR	382	125	274	18		541	188	193	12
chr1	153614574	153614576	bulges	-	chr1:153614575-153614605:-	FALSE	5'- GGGGAGAACAGAGAGGAGCTGGGCTATGGGAAATGATTTG -3' rG4seq-K -----------------------------**---------	S100A14|ENSG00000189334.9	ENST00000344616.4;ENST00000368701.5;ENST00000368702.5;ENST00000476873.5	3UTR	87	24	149	14		110	34	100	2
chr1	153614661	153614662	two-quartet	-	chr1:153614662-153614686:-	FALSE	5'- GGGAGGCTCAGGGGACTGGTTGGGCCAGGGATGA -3' rG4seq-K ------------------------*---------	S100A14|ENSG00000189334.9	ENST00000344616.4;ENST00000368701.5;ENST00000368702.5;ENST00000476873.5	3UTR	42	20	48	2		58	24	53	1
chr1	153614837	153614840	bulges	-	chr1:153614838-153614864:-	FALSE	5'- GGGGGGTGTTGGGGAGAGACTGTGGGCCTGGAGATA -3' rG4seq-K ------------------------***---------	S100A14|ENSG00000189334.9	ENST00000344616.4;ENST00000368700.7;ENST00000368701.5;ENST00000368702.5;ENST00000476873.5	3UTR	119	18	130	2		139	31	98	4
chr1	153618848	153618850	longloop	-	chr1:153618849-153618877:-	FALSE	5'- GGGGTGGGCAGGGCAGAGCTGATCAGGGCCGAGCAGAA -3' rG4seq-K ---------------------------**---------	S100A13|ENSG00000189171.15	ENST00000339556.8;ENST00000392622.3;ENST00000392623.5;ENST00000440685.7;ENST00000476133.6;ENST00000491177.1	3UTR	58	32	20	1		72	39	18	0
chr1	153959184	153959185	longloop	-	chr1:153959185-153959209:-	FALSE	5'- GGGGAGGGAGGGCTGTGCATAGGGACATATTCTT -3' rG4seq-K ------------------------*---------	ENSG00000285779|ENSG00000285779.1;SLC39A1|ENSG00000143570.19	ENST00000310483.10;ENST00000356205.9;ENST00000368621.5;ENST00000368623.7;ENST00000537590.5;ENST00000617697.4;ENST00000621013.4;ENST00000648921.1	3UTR	50	42	9	0		51	41	14	3
chr1	153959380	153959381	longloop	-	chr1:153959379-153959411:-	FALSE	5'- GGGGTGGGGCAGAAATATTTTCTGGGCTGGGGTAGGAGGAAG -3' rG4seq-K ------------------------------*-----------	ENSG00000285779|ENSG00000285779.1;SLC39A1|ENSG00000143570.19	ENST00000310483.10;ENST00000356205.9;ENST00000368621.5;ENST00000368623.7;ENST00000537590.5;ENST00000617697.4;ENST00000621013.4;ENST00000648921.1	3UTR	12	11	11	1		20	17	6	0
chr1	154970135	154970136	longloop	-	chr1:154970136-154970172:-	FALSE	5'- GGGCGCAGGACTCGGGTGGAAGGGGGCCAGCTTGGGGGCGAGGAGT -3' rG4seq-K ------------------------------------*---------	SHC1|ENSG00000160691.19	ENST00000366442.2;ENST00000368445.9;ENST00000368449.8;ENST00000368450.5;ENST00000368453.8;ENST00000412170.5;ENST00000448116.7	CDS	31	20	15	1		27	19	11	0
chr1	155172878	155172879	longloop	-	chr1:155173220-155173236:-,chr1:155172879-155172892:-	TRUE	5'- GGGCGGGGCATGATGGTGGTGGGTACGGGCACCTCGCTG -3' rG4seq-K -----------------------------*---------	ENSG00000273088|ENSG00000273088.2;KRTCAP2|ENSG00000163463.13	ENST00000295682.6;ENST00000461136.5;ENST00000471891.5;ENST00000473363.3;ENST00000482246.5;ENST00000487350.5;ENST00000490672.2;ENST00000491084.5;ENST00000497317.5	5UTR;CDS	40	11	13	0		54	28	6	0
chr1	155172884	155172885	bulges	-	chr1:155173220-155173236:-,chr1:155172885-155172892:-	TRUE	5'- GGGCGGGGCATGATGGTGGTGGGTACGGGCACC -3' rG4seq-K -----------------------*---------	ENSG00000273088|ENSG00000273088.2;KRTCAP2|ENSG00000163463.13	ENST00000295682.6;ENST00000461136.5;ENST00000471891.5;ENST00000473363.3;ENST00000482246.5;ENST00000487350.5;ENST00000490672.2;ENST00000491084.5;ENST00000497317.5	5UTR;CDS	19	15	12	3		20	16	7	2
chr1	156250409	156250411	longloop	-	chr1:156250409-156250442:-	FALSE	5'- GGGAGGGCCCAGGAGCCGGCTGGGAGGGTGGGGTCCCTTTGTT -3' rG4seq-K -------------------------------**----------	SMG5|ENSG00000198952.8	ENST00000361813.5;ENST00000476954.1	3UTR	74	52	16	0		101	69	24	0
chr1	156641865	156641867	canonical/G3L1-7	-	chr1:156641866-156641895:-	FALSE	5'- GGGAGGAGGGGCAGGAGGGGCGGGGAGGGAGCGTTCGCC -3' rG4seq-K ----------------------------**---------	ENSG00000272405|ENSG00000272405.1	ENST00000605886.1	non_coding	91	35	44	0		125	51	40	1
chr1	156641871	156641872	canonical/G3L1-7	-	chr1:156641871-156641895:-	FALSE	5'- GGGAGGAGGGGCAGGAGGGGCGGGGAGGGAGCGT -3' rG4seq-K -----------------------*----------	ENSG00000272405|ENSG00000272405.1	ENST00000605886.1	non_coding	13	9	19	0		16	9	10	0
chr1	156742981	156742983	longloop	-	chr1:156742981-156743020:-	FALSE	5'- GGGGCCTGGGAGGGGCAATCCTCAAATGCGGGGTGGGGGCAGCACAGGA -3' rG4seq-K -------------------------------------**----------	HDGF|ENSG00000143321.19	ENST00000357325.10;ENST00000368209.9;ENST00000465180.5;ENST00000537739.5	3UTR	61	30	21	1		80	29	23	0
chr1	159918161	159918162	potential G-quadruplex & G>=40%	-	chr1:159918161-159918221:-	FALSE	5'- CTGTGGCTAAGGGGTGGGGTGAGGGGATGGAGAGGGAGGGCTGCCTACCATGGTCTGGGGCTTGAGGAAG -3' rG4seq-K -----------------------------------------------------------*----------	TAGLN2|ENSG00000158710.15	ENST00000368096.5;ENST00000368097.9	3UTR	20	16	12	1		15	12	9	1
chr1	160216883	160216885	canonical/G3L1-7	-	chr1:160216884-160216913:-	FALSE	5'- GGGAGGCTGGGAAGAGGTGGGAGGAGGGGCAGAAGTGAA -3' rG4seq-K ----------------------------**---------	DCAF8|ENSG00000132716.19;ENSG00000258465|ENSG00000258465.8	ENST00000326837.6;ENST00000368073.7;ENST00000368074.6;ENST00000477163.1;ENST00000647676.1	3UTR;CDS	49	20	19	5		56	26	18	0
chr1	160305480	160305482	potential G-triplex & G>=40%	-	chr1:160305480-160305540:-	FALSE	5'- TTTATGTAACATTCATGAGAACATTCGTGTCAAGAGTGGGGCCTGGGATGAGAGTGGGGTATTTATCTAT -3' rG4seq-K ----------------------------------------------------------**----------	COPA|ENSG00000122218.16	ENST00000241704.8;ENST00000368069.7;ENST00000481522.1;ENST00000647683.1;ENST00000647693.1;ENST00000647799.1;ENST00000647899.1;ENST00000648501.1;ENST00000648632.1;ENST00000648805.1;ENST00000649231.1;ENST00000649676.1;ENST00000649787.1;ENST00000649963.1;ENST00000650154.1	3UTR;CDS	21	11	28	0		32	12	14	2
chr1	161117964	161117965	bulges	-	chr1:161117963-161117990:-	FALSE	5'- GGGAGCGGCGCGGGGAAGGGGGCGGTGTCCGCAGAGC -3' rG4seq-K -------------------------*-----------	PFDN2|ENSG00000143256.5	ENST00000368010.4;ENST00000468311.1	CDS	17	9	9	0		28	19	12	0
chr1	201483650	201483652	canonical/G3L1-7	-	chr1:201483651-201483674:-	FALSE	5'- GGGAGGAAGGGGAAAGGGCTGGGCCTCACCGCT -3' rG4seq-K ----------------------**---------	CSRP1|ENSG00000159176.14	ENST00000340006.7;ENST00000367306.5;ENST00000527662.5;ENST00000532313.5;ENST00000533402.5	3UTR	124	36	24	0		129	32	28	2
chr1	201483661	201483662	two-quartet	-	chr1:201483662-201483690:-	FALSE	5'- GGTTAGGAATAGTGGTGGGAGGAAGGGGAAAGGGCTGG -3' rG4seq-K ----------------------------*---------	CSRP1|ENSG00000159176.14	ENST00000340006.7;ENST00000367306.5;ENST00000527662.5;ENST00000532313.5;ENST00000533402.5	3UTR	29	17	12	2		36	20	12	1
chr1	205714288	205714289	longloop	-	chr1:205714289-205714327:-	FALSE	5'- GGGGTGAAGGGAGGGTTTTCTAGATTATTGGGGGAGGGTAAAATTGGG -3' rG4seq-K --------------------------------------*---------	NUCKS1|ENSG00000069275.13	ENST00000367142.5	3UTR	33	23	11	1		23	13	6	0
chr1	205717622	205717623	canonical/G3L1-7	-	chr1:205717622-205717641:-	FALSE	5'- GGGAGGGTGGGCAATGGGGTTACCTGACC -3' rG4seq-K ------------------*----------	NUCKS1|ENSG00000069275.13	ENST00000367142.5	3UTR	49	46	10	2		46	42	9	0
chr1	235110218	235110219	potential G-quadruplex & G>=40%	-	chr1:235110218-235110278:-	FALSE	5'- GGGCTCAGAAAAAGGAGGGCTGGCTGGAGGAGTGAGGGGCAGCTTAAGTTTGGGGAGGGTAGAAACGCCG -3' rG4seq-K -----------------------------------------------------------*----------	TOMM20|ENSG00000173726.11	ENST00000366607.5	3UTR	38	32	18	3		66	49	15	0
chr1	235110301	235110304	canonical/G3L1-7	-	chr1:235110302-235110334:-	FALSE	5'- GGGAGAACAGGGGTGGGAAAGGGAGCAAGGGGCAGATAGCTC -3' rG4seq-K ------------------------------***---------	TOMM20|ENSG00000173726.11	ENST00000366607.5	3UTR	162	54	41	1		178	53	20	1
chr1	235110310	235110311	canonical/G3L1-7	-	chr1:235110311-235110334:-	FALSE	5'- GGGAGAACAGGGGTGGGAAAGGGAGCAAGGGGC -3' rG4seq-K -----------------------*---------	TOMM20|ENSG00000173726.11	ENST00000366607.5	3UTR	23	17	13	1		22	16	8	2
chr1	244862726	244862729	longloop	-	chr1:244863673-244863703:-,chr1:244862727-244862730:-	TRUE	5'- GGGCGAGGCAGGGCCAGCAGCAGGCGGGAGGGGACGGCAAAAC -3' rG4seq-K -------------------------------***---------	HNRNPU|ENSG00000153187.20	ENST00000283179.14;ENST00000366525.8;ENST00000440865.2;ENST00000444376.7;ENST00000476241.2;ENST00000638475.1;ENST00000638952.1;ENST00000640056.1;ENST00000640218.2;ENST00000640306.1;ENST00000640440.1;ENST00000649899.1	CDS	191	26	125	1		292	40	139	3
chr1	244864022	244864023	two-quartet	-	chr1:244864023-244864050:-	FALSE	5'- GGAGGAAGAGGAAGAGGAGGAGGAAGGAATCTCCGCT -3' rG4seq-K ---------------------------*---------	HNRNPU|ENSG00000153187.20	ENST00000283179.14;ENST00000444376.7;ENST00000476241.2;ENST00000638475.1;ENST00000638952.1;ENST00000640218.2;ENST00000640306.1;ENST00000649899.1	CDS	111	41	44	2		150	67	30	1
chr1	244864026	244864027	bulges	-	chr1:244864027-244864067:-	FALSE	5'- GGCGGCGATGAAGAGGAGGAGGAAGAGGAAGAGGAGGAGGAAGGAATCTC -3' rG4seq-K ----------------------------------------*---------	HNRNPU|ENSG00000153187.20	ENST00000283179.14;ENST00000444376.7;ENST00000476241.2;ENST00000638475.1;ENST00000638952.1;ENST00000640218.2;ENST00000640306.1;ENST00000649899.1	CDS	62	55	40	4		71	60	24	3
chr10	3778989	3778991	two-quartet	-	chr10:3778990-3779016:-	FALSE	5'- GGAAAATCTTGGAGGGTGGGCGTGGGAACTCAGGAC -3' rG4seq-K -------------------------**---------	KLF6|ENSG00000067082.15	ENST00000461124.1;ENST00000497571.6;ENST00000542957.1	3UTR	56	17	59	4		68	25	48	3
chr10	3785137	3785138	canonical/G3L1-7	-	chr10:3785138-3785162:-	FALSE	5'- GGGCTGCGGGAGGGTCCGGCCGGGCGTCTCTGCG -3' rG4seq-K ------------------------*---------	KLF6|ENSG00000067082.15	ENST00000380946.3;ENST00000469435.1;ENST00000497571.6;ENST00000542957.1	5UTR	41	15	36	0		65	22	38	1
chr10	32268746	32268747	canonical/G3L1-7	-	chr10:32268747-32268767:-	FALSE	5'- GGGGGTGGGGGGTGGGAGGGAAATCAATTG -3' rG4seq-K --------------------*---------	EPC1|ENSG00000120616.16	ENST00000319778.11;ENST00000375110.6;ENST00000667706.1	3UTR	30	27	11	3		48	42	7	2
chr10	70150903	70150904	longloop	-	chr10:70150904-70150942:-	FALSE	5'- GGGTAGGGAAAATGTGGATAACATTACTGGGGTGAGGGAGGCATTGTT -3' rG4seq-K --------------------------------------*---------	SAR1A|ENSG00000079332.15	ENST00000373238.5;ENST00000373241.9;ENST00000373242.6;ENST00000431664.6	3UTR	19	15	10	0		24	15	9	1
chr10	71816747	71816748	canonical/G3L1-7	-	chr10:71816748-71816778:-	FALSE	5'- GGGGTTCTGTGGGTTTGGGTGGGAAGAGGGCCATCTGCCT -3' rG4seq-K ------------------------------*---------	PSAP|ENSG00000197746.15	ENST00000394936.8	3UTR	176	64	23	2		229	105	17	0
chr10	71816754	71816755	canonical/G3L1-7	-	chr10:71816755-71816778:-	FALSE	5'- GGGGTTCTGTGGGTTTGGGTGGGAAGAGGGCCA -3' rG4seq-K -----------------------*---------	PSAP|ENSG00000197746.15	ENST00000394936.8	3UTR	92	86	23	1		103	96	15	3
chr10	101818381	101818382	bulges	-	chr10:101818381-101818417:-	FALSE	5'- GGCAGCAGCAGAGGGAGAGCTCGGGGCTTGGAGGGGAAACAGCGGA -3' rG4seq-K -----------------------------------*----------	OGA|ENSG00000198408.14	ENST00000357797.9;ENST00000361464.8;ENST00000370094.7;ENST00000439817.5	5UTR	16	10	9	0		22	14	11	1
chr10	103089570	103089571	longloop	-	chr10:103089569-103089595:-	FALSE	5'- GGGTTCTACTCGGGGGAGGGAGGGGGCTCCATGAAA -3' rG4seq-K ------------------------*-----------	NT5C2|ENSG00000076685.19	ENST00000343289.9;ENST00000369857.9;ENST00000404739.8;ENST00000674696.1;ENST00000674728.1;ENST00000674860.1;ENST00000675020.1;ENST00000675040.1;ENST00000675164.1;ENST00000675326.1;ENST00000675436.1;ENST00000675645.1;ENST00000675811.1;ENST00000675985.1;ENST00000676428.1;ENST00000676449.1	3UTR	31	28	8	1		45	35	6	1
chr11	1752859	1752861	bulges	-	chr11:1752859-1752892:-	FALSE	5'- GTATTGGCCTGGAGGTGGGGTTGGGATTGGGGGCTGGTGCCAG -3' rG4seq-K -------------------------------**----------	CTSD|ENSG00000117984.15;ENSG00000250644|ENSG00000250644.3	ENST00000236671.7;ENST00000367196.4;ENST00000427721.3;ENST00000429746.2;ENST00000433655.6;ENST00000636397.1;ENST00000636579.1;ENST00000636615.1;ENST00000637381.2;ENST00000637815.2;ENST00000637915.1;ENST00000637937.1;ENST00000678991.1	3UTR;non_coding	107	35	23	2		115	49	22	2
chr11	6476637	6476639	canonical/G3L1-7	-	chr11:6476638-6476665:-	FALSE	5'- GGGACCAAAGGGGTGGGGATAATGGGGAGCCCCATTG -3' rG4seq-K --------------------------**---------	ARFIP2|ENSG00000132254.13	ENST00000254584.6;ENST00000396777.8;ENST00000531037.5;ENST00000614314.4	3UTR	178	59	42	2		265	105	46	2
chr11	6476647	6476649	canonical/G3L1-7	-	chr11:6476647-6476672:-	FALSE	5'- GGGGACTGGGACCAAAGGGGTGGGGATAATGGGGA -3' rG4seq-K -----------------------**----------	ARFIP2|ENSG00000132254.13	ENST00000254584.6;ENST00000396777.8;ENST00000531037.5;ENST00000614314.4	3UTR	177	33	37	3		49	37	40	1
chr11	6477048	6477049	longloop	-	chr11:6477049-6477074:-	FALSE	5'- GGGAAGGGCAGCCCCAGGGTGTGGGAGATTGGACA -3' rG4seq-K -------------------------*---------	ARFIP2|ENSG00000132254.13	ENST00000254584.6;ENST00000396777.8;ENST00000423813.6;ENST00000445086.6;ENST00000531037.5;ENST00000614314.4	3UTR	29	17	29	5		27	16	24	0
chr11	8947910	8947911	canonical/G3L1-7	-	chr11:8947911-8947934:-	FALSE	5'- GGGAGAGGGGAGGGATGCCTGGGAAGTGGTTAA -3' rG4seq-K -----------------------*---------	TMEM9B|ENSG00000175348.11	ENST00000309134.9;ENST00000525069.5;ENST00000534025.6	3UTR	16	13	8	2		17	10	6	0
chr11	10806854	10806856	two-quartet	-	chr11:10806855-10806876:-	FALSE	5'- GGGCGGAGGAGGAAGTAGGGGTGCACCTCAG -3' rG4seq-K --------------------**---------	EIF4G2|ENSG00000110321.19	ENST00000339995.11;ENST00000396525.7;ENST00000524932.6;ENST00000525681.6;ENST00000525972.5;ENST00000525995.1;ENST00000526148.6;ENST00000527419.6;ENST00000527526.6;ENST00000528562.6;ENST00000530211.6;ENST00000530702.2;ENST00000531416.6;ENST00000531507.5;ENST00000531647.6;ENST00000532082.6;ENST00000532383.5;ENST00000532570.6;ENST00000533485.1	CDS	55	13	80	7		79	17	77	3
chr11	47467093	47467094	longloop	-	chr11:47467094-47467132:-	FALSE	5'- GGGAAGGGTGGAGAGATGTAGCTAGGGGCTGGGGAGGGGGAGGTGGAA -3' rG4seq-K --------------------------------------*---------	CELF1|ENSG00000149187.19	ENST00000310513.10;ENST00000395290.6;ENST00000687097.1	3UTR	16	10	15	1		15	9	10	0
chr11	47467417	47467418	canonical/G3L1-7	-	chr11:47467418-47467439:-	FALSE	5'- GGGGTGGGGGAAAGGGCAGGGATTTGTTTTT -3' rG4seq-K ---------------------*---------	CELF1|ENSG00000149187.19	ENST00000310513.10;ENST00000395290.6;ENST00000687097.1	3UTR	27	25	6	1		36	32	7	0
chr11	57326177	57326179	canonical/G3L1-7	-	chr11:57326178-57326203:-	FALSE	5'- GGGAGAGATAGGGTGGGAGGCAGGGCAATGCAGGA -3' rG4seq-K ------------------------**---------	SSRP1|ENSG00000149136.9	ENST00000278412.7;ENST00000293880.9	3UTR	49	30	26	3		69	37	24	0
chr11	60890784	60890786	longloop	-	chr11:60890785-60890814:-	FALSE	5'- GGGAACTGTGAAGGGGATGGGCAGGAGGGCTTGTGCAGG -3' rG4seq-K ----------------------------**---------	PRPF19|ENSG00000110107.9	ENST00000227524.9;ENST00000535326.1;ENST00000540473.5	3UTR;CDS	31	21	18	1		15	13	16	0
chr11	61299701	61299703	canonical/G3L1-7	-	chr11:61299702-61299729:-	FALSE	5'- GGGAGTTGTGGGTAGTGGGGAAGAGGGTTAGGAGGGT -3' rG4seq-K --------------------------**---------	DDB1|ENSG00000167986.15	ENST00000301764.12;ENST00000451943.6;ENST00000535283.6;ENST00000545894.1;ENST00000679588.1;ENST00000679712.1;ENST00000680075.1;ENST00000680250.1;ENST00000680345.1;ENST00000680357.1;ENST00000680367.1;ENST00000680452.1;ENST00000680602.1;ENST00000680717.1;ENST00000680881.1;ENST00000680959.1;ENST00000681188.1;ENST00000681580.1;ENST00000681803.1;ENST00000681815.1;ENST00000681935.1	3UTR	37	20	25	2		48	21	22	0
chr11	62516207	62516208	bulges	-	chr11:62516208-62516243:-	FALSE	5'- GTGGTGGTAGTCAGGGTGTGTGGGTGTTTTTAGGGTTCTTTAGTG -3' rG4seq-K -----------------------------------*---------	AHNAK|ENSG00000124942.14	ENST00000257247.11;ENST00000378024.9;ENST00000525875.1;ENST00000530124.5;ENST00000533365.5	3UTR	36	22	17	0		42	26	11	2
chr11	62516328	62516329	bulges	-	chr11:62516328-62516355:-	FALSE	5'- GGCTTTTGTTAGTAAGGGTGGGTGGGGTGATGGGTTG -3' rG4seq-K --------------------------*----------	AHNAK|ENSG00000124942.14	ENST00000257247.11;ENST00000378024.9;ENST00000525875.1;ENST00000530124.5;ENST00000533365.5	3UTR	30	28	11	2		61	56	9	2
chr11	62536508	62536510	bulges	-	chr11:62536509-62536534:-	FALSE	5'- GGGGAAGAGAGGAAGGAGGGGCGGGCTCCTGGCAA -3' rG4seq-K ------------------------**---------	AHNAK|ENSG00000124942.14	ENST00000257247.11;ENST00000378024.9;ENST00000528508.5;ENST00000530285.5;ENST00000531324.1;ENST00000533365.5	5UTR	44	16	23	1		60	24	28	1
chr11	62593849	62593850	bulges	-	chr11:62593850-62593881:-	FALSE	5'- GGACTGAGCACCTGTGGGGAAGGGAGGTGGGCTGAGAGGTA -3' rG4seq-K -------------------------------*---------	MTA2|ENSG00000149480.7	ENST00000278823.7;ENST00000524902.5;ENST00000527204.5	3UTR;CDS	13	11	8	0		13	9	7	0
chr11	62625777	62625779	canonical/G3L1-7	-	chr11:62625778-62625809:-	FALSE	5'- GGGATGTTCTGGGTTAGGGGGAGGGAAGGGGAGCATTAGTG -3' rG4seq-K ------------------------------**---------	GANAB|ENSG00000089597.18	ENST00000346178.8;ENST00000356638.8;ENST00000528503.1;ENST00000532402.5;ENST00000534779.5;ENST00000540933.5;ENST00000648273.1	3UTR	174	69	39	3		207	68	24	2
chr11	62625783	62625784	canonical/G3L1-7	-	chr11:62625784-62625809:-	FALSE	5'- GGGATGTTCTGGGTTAGGGGGAGGGAAGGGGAGCA -3' rG4seq-K -------------------------*---------	GANAB|ENSG00000089597.18	ENST00000346178.8;ENST00000356638.8;ENST00000528503.1;ENST00000532402.5;ENST00000534779.5;ENST00000540933.5;ENST00000648273.1	3UTR	25	21	17	1		31	28	9	2
chr11	62807184	62807185	two-quartet	-	chr11:62807185-62807211:-	FALSE	5'- GGCCAGCTGGGGGCCAGTGGGGGAGGTTGTTTCCAC -3' rG4seq-K --------------------------*---------	STX5|ENSG00000162236.13	ENST00000294179.8;ENST00000377897.8;ENST00000394690.5;ENST00000491231.5;ENST00000492066.5	3UTR	20	12	10	1		24	15	14	3
chr11	64769520	64769521	longloop	-	chr11:64769521-64769556:-	FALSE	5'- GGGGGAAAGGGTCTGTGAAAGAAGGGAAGGTTGGGCGCAAAGATG -3' rG4seq-K -----------------------------------*---------	SF1|ENSG00000168066.21	ENST00000227503.13;ENST00000334944.9;ENST00000377387.5;ENST00000377390.8;ENST00000377394.7;ENST00000433274.6;ENST00000448404.5;ENST00000486960.5;ENST00000489544.1;ENST00000496969.1;ENST00000681407.1	3UTR;CDS	22	14	11	2		28	16	12	2
chr11	64854143	64854144	bulges	-	chr11:64854144-64854168:-	FALSE	5'- GGCGGGGGAGGCAGGGGTGAGAGGATGGAATTGT -3' rG4seq-K ------------------------*---------	EHD1|ENSG00000110047.18	ENST00000320631.8;ENST00000359393.6;ENST00000484846.1;ENST00000621096.4	3UTR	46	19	11	0		53	25	10	0
chr11	67491823	67491824	canonical/G3L1-7	-	chr11:67491824-67491846:-	FALSE	5'- GGGAGGAGGGCGTGGGCATGGGCGCAGAGGCT -3' rG4seq-K ----------------------*---------	PITPNM1|ENSG00000110697.13	ENST00000356404.8;ENST00000436757.6;ENST00000527370.5;ENST00000534749.5	3UTR	18	13	11	0		29	21	14	0
chr11	85958017	85958019	bulges	-	chr11:85958018-85958048:-	FALSE	5'- GAAGGTGTTACAAGGGGGAGGGAAGGGGGGCAAAGTCCTT -3' rG4seq-K -----------------------------**---------	PICALM|ENSG00000073921.18	ENST00000393346.8;ENST00000526033.5;ENST00000532317.5	3UTR	108	60	32	3		97	47	32	4
chr11	93741426	93741428	longloop	-	chr11:93741427-93741455:-	FALSE	5'- GGGAGTTGGAGGGCTGAGGTCGGGAGGGTGGTGTGTAC -3' rG4seq-K ---------------------------**---------	TAF1D|ENSG00000166012.17	ENST00000323981.6;ENST00000448108.7;ENST00000526015.5;ENST00000527169.5;ENST00000527690.1;ENST00000529508.1;ENST00000532235.1;ENST00000532455.1;ENST00000534770.1	5UTR;CDS	46	35	27	1		64	44	20	0
chr11	102452739	102452740	bulges	-	chr11:102452739-102452761:-	FALSE	5'- GGGGGGCAAGCGGCGGGAGGGGAAACGTGCGC -3' rG4seq-K ---------------------*----------	TMEM123|ENSG00000152558.15	ENST00000361236.7;ENST00000398136.7;ENST00000525577.5	5UTR	32	28	7	0		36	33	9	2
chr11	118748166	118748168	canonical/G3L1-7	-	chr11:118748167-118748192:-	FALSE	5'- GGGTAAGGGAGGGGGTAGGGCTGGGTTATTAAGAT -3' rG4seq-K ------------------------**---------	DDX6|ENSG00000110367.14	ENST00000534980.7;ENST00000620157.4	3UTR	92	62	30	4		126	81	20	2
chr11	118748928	118748929	longloop	-	chr11:118748928-118748957:-	FALSE	5'- GGGTTGGCCCCAAAGGGTTGGAGGGTGGGCTTGGTTATC -3' rG4seq-K ----------------------------*----------	DDX6|ENSG00000110367.14	ENST00000534980.7;ENST00000620157.4	3UTR	10	8	6	0		13	8	10	0
chr11	118749793	118749795	canonical/G3L1-7	-	chr11:118749794-118749812:-	FALSE	5'- GGGAGGGGTGGGAGAGGGAATTTAAAAG -3' rG4seq-K -----------------**---------	DDX6|ENSG00000110367.14	ENST00000534980.7;ENST00000620157.4	3UTR	64	55	29	3		73	64	12	0
chr11	118898293	118898295	canonical/G3L1-7	-	chr11:118898294-118898322:-	FALSE	5'- GGGGTGGGGTGGAGGGGGTGGGAGGGGGCTTGTGTAGG -3' rG4seq-K ---------------------------**---------	BCL9L|ENSG00000186174.13	ENST00000334801.7;ENST00000526143.2;ENST00000683865.1	3UTR	32	21	14	1		52	30	19	1
chr11	118908436	118908438	canonical/G3L1-7	-	chr11:118908437-118908463:-	FALSE	5'- GGGCGTGGGGGCGGGGAACCATGGGGCCAAGGCCAA -3' rG4seq-K -------------------------**---------	BCL9L|ENSG00000186174.13	ENST00000334801.7;ENST00000526143.2;ENST00000527266.1;ENST00000530293.1;ENST00000683865.1	CDS	61	21	16	0		72	28	18	0
chr11	118908446	118908448	canonical/G3L1-7	-	chr11:118908447-118908472:-	FALSE	5'- GGGCTCGAAGGGCGTGGGGGCGGGGAACCATGGGG -3' rG4seq-K ------------------------**---------	BCL9L|ENSG00000186174.13	ENST00000334801.7;ENST00000526143.2;ENST00000527266.1;ENST00000530293.1;ENST00000683865.1	CDS	20	7	20	0		29	9	12	0
chr11	119045436	119045438	bulges	-	chr11:119045437-119045463:-	FALSE	5'- GAGGTGTGGAGAAGGGGAAGGGAGGGACAGCTCACT -3' rG4seq-K -------------------------**---------	HYOU1|ENSG00000149428.20	ENST00000532519.6;ENST00000612687.4;ENST00000614711.4;ENST00000617285.5;ENST00000621959.4;ENST00000652093.1	3UTR	82	50	54	3		107	50	36	4
chr11	119057090	119057092	bulges	-	chr11:119057089-119057107:-	FALSE	5'- GGGCGCGGGTGGGGGGCGCTGCCGGCCT -3' rG4seq-K ---------------**-----------	HYOU1|ENSG00000149428.20	ENST00000526354.1;ENST00000527038.6;ENST00000529174.1;ENST00000530467.5;ENST00000531968.5;ENST00000532421.5;ENST00000532519.6;ENST00000534233.5;ENST00000543287.5;ENST00000610597.1;ENST00000612687.4;ENST00000614711.4;ENST00000617285.5;ENST00000621959.4;ENST00000622474.4;ENST00000652093.1	5UTR	44	22	35	2		85	43	24	2
chr12	6570509	6570510	canonical/G3L1-7	-	chr12:6570509-6570532:-	FALSE	5'- GGGGGAGGGGAGGGAGTGAGGGGCAGTGGTGCC -3' rG4seq-K ----------------------*----------	CHD4|ENSG00000111642.16;ENSG00000285238|ENSG00000285238.2	ENST00000357008.7;ENST00000535717.2;ENST00000544040.7;ENST00000544484.6;ENST00000642594.1;ENST00000642637.1;ENST00000642686.1;ENST00000642810.1;ENST00000642860.1;ENST00000642879.1;ENST00000643335.1;ENST00000643538.1;ENST00000643815.1;ENST00000644077.1;ENST00000644137.1;ENST00000644352.1;ENST00000644480.2;ENST00000644652.1;ENST00000645005.1;ENST00000645022.1;ENST00000645095.1;ENST00000645143.1;ENS…	3UTR;non_coding	24	12	12	1		40	26	6	0
chr12	6601978	6601979	bulges	-	chr12:6601979-6602005:-	FALSE	5'- GCGGAAGGAGGAGGAGGAGGAGGAGGATGATGATGA -3' rG4seq-K --------------------------*---------	CHD4|ENSG00000111642.16;ENSG00000285238|ENSG00000285238.2	ENST00000357008.7;ENST00000430771.2;ENST00000544040.7;ENST00000544484.6;ENST00000545584.2;ENST00000545942.6;ENST00000642594.1;ENST00000642810.1;ENST00000642879.1;ENST00000643335.1;ENST00000644137.1;ENST00000644289.1;ENST00000644480.2;ENST00000644801.1;ENST00000645005.1;ENST00000645022.1;ENST00000645095.1;ENST00000645645.1;ENST00000646268.1;ENST00000646806.1	CDS	27	24	13	3		20	17	6	2
chr12	12562380	12562381	bulges	-	chr12:12562378-12562395:-	FALSE	5'- GGGGGGGAGGGTGGAAGAGAAAGAGTG -3' rG4seq-K --------------*------------	DUSP16|ENSG00000111266.9	ENST00000228862.3;ENST00000298573.9	5UTR	17	16	6	0		14	13	8	0
chr12	48938420	48938421	canonical/G3L1-7	-	chr12:48938419-48938445:-	FALSE	5'- GGGGGCCGGGGGGAGCGGGGAGGGGGTGGAGTGAAG -3' rG4seq-K ------------------------*-----------	ARF3|ENSG00000134287.10;ENSG00000272822|ENSG00000272822.2	ENST00000256682.9;ENST00000398092.4;ENST00000485410.5;ENST00000537495.2	3UTR;non_coding	21	14	9	1		25	18	10	2
chr12	48957409	48957410	canonical/G3L1-7	-	chr12:48957410-48957433:-	FALSE	5'- GGGAGCCGGGGAGTGGGCCAGGGCAGCAGCCGG -3' rG4seq-K -----------------------*---------	ARF3|ENSG00000134287.10	ENST00000256682.9;ENST00000447318.6;ENST00000485410.5;ENST00000536283.1;ENST00000541959.5	5UTR	40	14	8	0		64	34	12	0
chr12	52897459	52897460	potential G-quadruplex & G>=40%	-	chr12:52897459-52897519:-	FALSE	5'- GCACCAGCTCCTCCAGGGCCGTGGTTGTGAAGAAGATCGAGACACGTGATGGGAAGCTGGTGTCTGAGTC -3' rG4seq-K -----------------------------------------------------------*----------	KRT8|ENSG00000170421.13	ENST00000293308.11;ENST00000546583.5;ENST00000546897.5;ENST00000550170.5;ENST00000552150.5;ENST00000552551.5;ENST00000692008.1	CDS	107	29	161	17		82	27	136	18
chr12	52902027	52902028	potential G-quadruplex & G>=40%	-	chr12:52902027-52902087:-	FALSE	5'- TCCTCCTTCGTATAGGTACGGTTCCTGGAGCAGCAGAACAAGATGCTGGAGACCAAGTGGAGCCTCCTGC -3' rG4seq-K -----------------------------------------------------------*----------	KRT8|ENSG00000170421.13	ENST00000293308.11;ENST00000546583.5;ENST00000546826.5;ENST00000546897.5;ENST00000546900.1;ENST00000548998.5;ENST00000549176.1;ENST00000550170.5;ENST00000552150.5;ENST00000552551.5;ENST00000692008.1	5UTR;CDS	26	15	51	11		23	17	32	11
chr12	52904798	52904799	bulges	-	chr12:52904796-52904831:-	FALSE	5'- GGCGGCGGCTATGGTGGGGCCAGCGGCATGGGAGGCATCACCGCA -3' rG4seq-K --------------------------------*------------	KRT8|ENSG00000170421.13	ENST00000293308.11;ENST00000546542.1;ENST00000546583.5;ENST00000546826.5;ENST00000546897.5;ENST00000548998.5;ENST00000550170.5;ENST00000552150.5;ENST00000552551.5;ENST00000692008.1	CDS	149	24	145	7		209	61	122	16
chr12	53669187	53669188	bulges	-	chr12:53669188-53669212:-	FALSE	5'- GGGGTGGCTGGTTCTGGGGCTGGGATTGGAACTG -3' rG4seq-K ------------------------*---------	ATP5MC2|ENSG00000135390.21	ENST00000338662.6;ENST00000394349.9;ENST00000495596.5;ENST00000549164.5;ENST00000549748.2;ENST00000550241.1;ENST00000552242.5;ENST00000673498.1	5UTR;CDS	29	16	17	1		38	17	9	0
chr12	56239147	56239148	canonical/G3L1-7	-	chr12:56239148-56239171:-	FALSE	5'- GGGTGAAGCTGGGGTGGGGAGGGTCTGCTCTTT -3' rG4seq-K -----------------------*---------	ANKRD52|ENSG00000139645.11	ENST00000267116.8;ENST00000548241.1	3UTR	22	21	7	2		28	22	6	1
chr12	76029665	76029666	two-quartet	-	chr12:76029665-76029679:-	FALSE	5'- GGGCGGTGGAGGGGAAAACATTAA -3' rG4seq-K -------------*----------	PHLDA1|ENSG00000139289.14	ENST00000266671.10;ENST00000602540.5;ENST00000619060.1	3UTR	33	15	68	8		30	8	39	1
chr12	110434976	110434977	longloop	-	chr12:110434977-110435009:-	FALSE	5'- GGGTGGGAGAAAAGAAAGTGGGTTATCAAGGGTGATTTGAAA -3' rG4seq-K --------------------------------*---------	ARPC3|ENSG00000111229.16;ENSG00000258210|ENSG00000258210.1	ENST00000228825.12;ENST00000467622.2;ENST00000550231.1	3UTR;non_coding	16	11	15	0		30	18	10	0
chr12	110742712	110742713	bulges	-	chr12:110742713-110742731:-	FALSE	5'- GGGAGGGTCGGCGGTGGGAAGGCGATGG -3' rG4seq-K ------------------*---------	PPP1CC|ENSG00000186298.12	ENST00000335007.10;ENST00000340766.9;ENST00000550991.5;ENST00000551676.5;ENST00000551690.1;ENST00000620030.1	5UTR	57	53	11	2		95	80	12	1
chr12	110742830	110742832	canonical/G3L1-7	-	chr12:110742831-110742854:-	FALSE	5'- GGGAGCGGGGTGGCAGGGGGGGGACCCGCCGCG -3' rG4seq-K ----------------------**---------	PPP1CC|ENSG00000186298.12	ENST00000335007.10;ENST00000340766.9;ENST00000550991.5;ENST00000551676.5;ENST00000551690.1;ENST00000620030.1	5UTR	32	11	21	0		65	28	18	1
chr12	114670548	114670550	two-quartet	-	chr12:114670549-114670564:-	FALSE	5'- GGGGAGGGAGGAGGGCAGAGGCTGC -3' rG4seq-K --------------**---------	TBX3|ENSG00000135111.16	ENST00000257566.7;ENST00000349155.7	3UTR	50	35	26	0		68	37	13	1
chr12	114671069	114671070	canonical/G3L1-7	-	chr12:114671070-114671101:-	FALSE	5'- GGGAGGGGGGGATTTAAAGGGAAGGAGTGGGCAAAACACAT -3' rG4seq-K -------------------------------*---------	TBX3|ENSG00000135111.16	ENST00000257566.7;ENST00000349155.7	3UTR	66	31	17	0		67	37	21	4
chr12	114671079	114671080	canonical/G3L1-7	-	chr12:114671080-114671101:-	FALSE	5'- GGGAGGGGGGGATTTAAAGGGAAGGAGTGGG -3' rG4seq-K ---------------------*---------	TBX3|ENSG00000135111.16	ENST00000257566.7;ENST00000349155.7	3UTR	28	25	16	3		26	21	15	0
chr12	114683680	114683681	bulges	-	chr12:114683679-114683708:-	FALSE	5'- GGGAGAGGAAGACAGATAGGGGGCGGGGGAAGAAGAAAA -3' rG4seq-K ---------------------------*-----------	TBX3|ENSG00000135111.16	ENST00000349155.7	5UTR	20	12	12	0		24	14	8	0
chr12	120096426	120096428	bulges	-	chr12:120096427-120096450:-	FALSE	5'- GGGGCTGGCAGGGGGGCTATGGGAGGATTATTT -3' rG4seq-K ----------------------**---------	RAB35|ENSG00000111737.12	ENST00000229340.10;ENST00000544304.5	3UTR	52	22	23	0		65	32	13	1
chr12	120210578	120210579	potential G-triplex & G>=40%	-	chr12:120210578-120210638:-	FALSE	5'- TACCGCTCTGTTTATAGTGACCCACCCTAGATCTTCCCCAAGAGGGACTGGGGTTTCTGGGGTCCATTCT -3' rG4seq-K -----------------------------------------------------------*----------	PXN|ENSG00000089159.17	ENST00000228307.11;ENST00000267257.11;ENST00000323871.9;ENST00000424649.6;ENST00000458477.6;ENST00000536957.5;ENST00000637617.2;ENST00000637624.1	3UTR	14	6	13	0		12	7	16	1
chr12	120211420	120211421	potential G-quadruplex & G>=40%	-	chr12:120211420-120211480:-	FALSE	5'- GCCTGTCACTGATGGTGGCTCTGGTGTGAAGTTTGCTTTGTACTGAGGGTTGGGGTGGGGAAGCAATTTG -3' rG4seq-K -----------------------------------------------------------*----------	PXN|ENSG00000089159.17	ENST00000228307.11;ENST00000267257.11;ENST00000323871.9;ENST00000424649.6;ENST00000458477.6;ENST00000536957.5;ENST00000637617.2;ENST00000637624.1	3UTR	18	12	10	0		17	12	7	0
chr12	132771848	132771849	bulges	-	chr12:132771847-132771875:-	FALSE	5'- GGAGAGGCCGGTGGAGGAGGAGGAGGAGAGCAGACCAG -3' rG4seq-K --------------------------*-----------	GOLGA3|ENSG00000090615.16	ENST00000204726.9;ENST00000450791.8;ENST00000687190.1;ENST00000688114.1;ENST00000690057.1;ENST00000690511.1;ENST00000693666.1	3UTR	31	13	8	0		33	16	12	1
chr13	27962315	27962316	two-quartet	-	chr13:27962316-27962328:-	FALSE	5'- GGGGGTGGGGGGAGTTTGTGTT -3' rG4seq-K ------------*---------	CDX2|ENSG00000165556.10	ENST00000381020.8	3UTR	40	29	21	3		56	38	19	2
chr13	27962483	27962484	bulges	-	chr13:27962484-27962517:-	FALSE	5'- GGTGTATGCACAGGGTGTGGTATGAGGGGGTGGTTATTGGACT -3' rG4seq-K ---------------------------------*---------	CDX2|ENSG00000165556.10	ENST00000381020.8	3UTR	38	17	19	1		59	25	21	1
chr13	27969176	27969178	longloop	-	chr13:27969177-27969210:-	FALSE	5'- GGGAGGGAGGGAGGAGGCAGGCCAGAGGGAGGGACCGCCTCGG -3' rG4seq-K --------------------------------**---------	CDX2|ENSG00000165556.10	ENST00000381020.8	5UTR	39	18	24	1		71	34	21	1
chr13	29510589	29510590	bulges	-	chr13:29510590-29510621:-	FALSE	5'- GGGGAAATTGCAGGGTGGTGGGGGCGTGAGGCTTATATGTG -3' rG4seq-K -------------------------------*---------	SLC7A1|ENSG00000139514.13	ENST00000380752.10	3UTR	57	29	14	0		90	38	12	0
chr13	29510597	29510599	bulges	-	chr13:29510597-29510621:-	FALSE	5'- GGGGAAATTGCAGGGTGGTGGGGGCGTGAGGCTT -3' rG4seq-K ----------------------**----------	SLC7A1|ENSG00000139514.13	ENST00000380752.10	3UTR	32	16	20	3		57	30	21	0
chr13	29513002	29513004	bulges	-	chr13:29513003-29513025:-	FALSE	5'- GGGGGAGGAGGAGGGATGTGGGCATTTTGGAC -3' rG4seq-K ---------------------**---------	SLC7A1|ENSG00000139514.13	ENST00000380752.10	3UTR	40	19	15	2		58	38	18	2
chr13	40932324	40932325	bulges	-	chr13:40932324-40932344:-	FALSE	5'- GGGGGCGGACTTGGGGGGGGTTGCATACAA -3' rG4seq-K -------------------*----------	ELF1|ENSG00000120690.16	ENST00000239882.7;ENST00000498824.4	3UTR	44	37	20	1		65	50	12	0
chr13	45340713	45340716	two-quartet	-	chr13:45340711-45340718:-,chr13:45340164-45340184:-	TRUE	5'- GGGGAAGATGGTCAGTAGGACAGAAGGTAACATTGAT -3' rG4seq-K --***--------------------------------	TPT1|ENSG00000133112.17	ENST00000309246.9;ENST00000379055.5;ENST00000379056.5;ENST00000379060.8;ENST00000442760.2;ENST00000490277.1;ENST00000527226.2;ENST00000529421.5;ENST00000530705.6;ENST00000533567.5;ENST00000616577.4	5UTR;CDS	795	256	1051	174		880	311	872	104
chr13	79337197	79337198	bulges	-	chr13:79337196-79337220:-	FALSE	5'- GGGGGCGAGGGCGAGGGCGAGGTGTGCCTGGTCA -3' rG4seq-K ----------------------*-----------	RBM26|ENSG00000139746.16	ENST00000267229.11;ENST00000438724.5;ENST00000438737.3;ENST00000449987.6;ENST00000622611.4	CDS	25	17	11	0		46	36	7	0
chr13	106490585	106490586	bulges	-	chr13:106490585-106490611:-	FALSE	5'- GGATGGGGGAGAGGGGCGAGAAGGGGAAAAATGGGA -3' rG4seq-K -------------------------*----------	EFNB2|ENSG00000125266.8	ENST00000643990.1;ENST00000646441.1	3UTR	10	9	9	0		17	12	9	1
chr13	106557316	106557318	two-quartet	-	chr13:106557317-106557350:-	FALSE	5'- GGGTTTAGTTGGTTGCTGTTTGGACTGGGAGGGATGATTTAAA -3' rG4seq-K --------------------------------**---------	ARGLU1|ENSG00000134884.15	ENST00000360629.3;ENST00000375926.5;ENST00000400198.8;ENST00000472226.2	non_coding	39	31	22	1		57	44	14	1
chr13	106559105	106559106	bulges	-	chr13:106559106-106559133:-	FALSE	5'- GGAGGACGGTGGGGAGACAGGGAGTGGTAAAGGGAAA -3' rG4seq-K ---------------------------*---------	ARGLU1|ENSG00000134884.15	ENST00000360629.3;ENST00000375926.5;ENST00000400198.8;ENST00000472226.2	non_coding	33	23	16	0		27	23	10	0
chr14	23059155	23059157	bulges	-	chr14:23059157-23059191:-	FALSE	5'- GGAGTCGGAGCACACCTGTGCGGGACCGGGGTGGGCGCCGCTAG -3' rG4seq-K ----------------------------------**--------	ACIN1|ENSG00000100813.15	ENST00000262710.5;ENST00000338631.10;ENST00000357481.6;ENST00000397341.7;ENST00000457657.5;ENST00000473758.5;ENST00000555053.5;ENST00000557515.5;ENST00000605057.6	3UTR;CDS	23	6	29	1		35	13	21	1
chr14	23059273	23059274	longloop	-	chr14:23059272-23059314:-	FALSE	5'- GGGACAGGGAGAGAGAGAGAGAAAGGGAGCGGGACAGGGGGGACCGAGATCG -3' rG4seq-K ----------------------------------------*-----------	ACIN1|ENSG00000100813.15	ENST00000262710.5;ENST00000338631.10;ENST00000357481.6;ENST00000397341.7;ENST00000457657.5;ENST00000473758.5;ENST00000555053.5;ENST00000557515.5;ENST00000605057.6	3UTR;CDS	17	9	11	0		33	17	17	0
chr14	23061425	23061426	longloop	-	chr14:23061426-23061459:-	FALSE	5'- GGGCAGAACGGGAACGGGAAATGGAGCGGCGGGAGCGGACTCG -3' rG4seq-K ---------------------------------*---------	ACIN1|ENSG00000100813.15	ENST00000262710.5;ENST00000338631.10;ENST00000357481.6;ENST00000397341.7;ENST00000457657.5;ENST00000473758.5;ENST00000555053.5;ENST00000557515.5;ENST00000605057.6	3UTR;CDS	32	19	14	1		59	38	13	0
chr14	34434718	34434719	canonical/G3L1-7	-	chr14:34434719-34434739:-	FALSE	5'- GGGTAGGGGTATGGGGAGGGAAGATATTTT -3' rG4seq-K --------------------*---------	EGLN3|ENSG00000129521.15;SPTSSA|ENSG00000165389.7	ENST00000298130.5;ENST00000551935.5	3UTR;non_coding	49	46	20	5		40	36	8	1
chr14	37591932	37591935	bulges	-	chr14:37591932-37591967:-	FALSE	5'- GGGGCCGGCGGCGGGGGCGGGAGCGGAAGCGGGGGCAGCGGCGCC -3' rG4seq-K --------------------------------***----------	FOXA1|ENSG00000129514.8	ENST00000250448.5;ENST00000545425.2	CDS	26	16	42	4		48	26	32	6
chr14	53956787	53956789	bulges	-	chr14:53956788-53956811:-	FALSE	5'- GGCAGAGGAGGAGGGAGGGAGGGAAGGAGCGCG -3' rG4seq-K ----------------------**---------	BMP4|ENSG00000125378.16	ENST00000245451.9;ENST00000559087.5;ENST00000559642.1	5UTR	97	74	19	1		81	57	29	3
chr14	69380503	69380505	canonical/G3L1-7	-	chr14:69380504-69380521:-	FALSE	5'- GGGGGGGTTGGGGTGGGCTTGGAACAC -3' rG4seq-K ----------------**---------	ERH|ENSG00000100632.11	ENST00000216520.6;ENST00000557016.6	3UTR	253	162	29	3		258	172	26	5
chr15	34979656	34979657	bulges	-	chr15:34979656-34979673:-	FALSE	5'- GGGGGGAGGCGGGAGGGATAGTAGGTG -3' rG4seq-K ----------------*----------	ZNF770|ENSG00000198146.4	ENST00000356321.4	3UTR	7	6	7	0		11	10	6	1
chr15	41900610	41900611	longloop	-	chr15:41900610-41900639:-	FALSE	5'- GGGCTGCAGAACGGGGTGGGAACTGGGGGACCTGGGCCT -3' rG4seq-K ----------------------------*----------	EHD4|ENSG00000103966.11	ENST00000220325.9	3UTR	62	23	13	1		70	31	15	0
chr15	41900618	41900619	longloop	-	chr15:41900619-41900644:-	FALSE	5'- GGGGTGGGCTGCAGAACGGGGTGGGAACTGGGGGA -3' rG4seq-K -------------------------*---------	EHD4|ENSG00000103966.11	ENST00000220325.9	3UTR	25	23	12	3		29	25	10	3
chr15	41900942	41900944	bulges	-	chr15:41900943-41900978:-	FALSE	5'- GGGTGCCAAGGAGGGCGCCGACGAGGAGGAGTGGGTCGTGGCCAA -3' rG4seq-K ----------------------------------**---------	EHD4|ENSG00000103966.11	ENST00000220325.9	CDS	28	17	24	4		29	20	27	5
chr15	41972460	41972462	bulges	-	chr15:41972461-41972480:-	FALSE	5'- GGGGCGGCAGGCGGGCGGGCGCGAACGCG -3' rG4seq-K ------------------**---------	EHD4|ENSG00000103966.11	ENST00000220325.9;ENST00000569223.1	CDS	104	72	20	1		140	94	16	0
chr15	59136749	59136751	canonical/G3L1-7	-	chr15:59136750-59136773:-	FALSE	5'- GGGGCTGGGGGCTGGGGGCTGGGCTGCTGGCTT -3' rG4seq-K ----------------------**---------	MYO1E|ENSG00000157483.9	ENST00000288235.9;ENST00000559412.1	3UTR;CDS	71	43	19	2		135	71	20	2
chr15	64156125	64156126	bulges	-	chr15:64156724-64156733:-,chr15:64156127-64156145:-	TRUE	5'- GAGGGCATGGAGGTGGTGCGGAAGGTGGAGAGCACCA -3' rG4seq-K ----------------------------*--------	PPIB|ENSG00000166794.6	ENST00000300026.4;ENST00000561048.2;ENST00000680158.1;ENST00000680343.1;ENST00000681397.1;ENST00000681658.1	3UTR;CDS	42	16	58	4		53	25	52	2
chr15	84669819	84669821	potential G-triplex & G>=40%	-	chr15:84669819-84669879:-	FALSE	5'- TTTCCATGCCAGAGTTTGTGTGGGCGGGCGCATGTGCACCACAGAGTGCACTCGAGGGGACTTTCAGTCA -3' rG4seq-K ----------------------------------------------------------**----------	SEC11A|ENSG00000140612.14	ENST00000268220.12;ENST00000455959.7;ENST00000558134.5;ENST00000558217.5;ENST00000558924.1;ENST00000559376.1;ENST00000559729.5;ENST00000560266.5;ENST00000560409.5	3UTR	31	6	59	0		25	6	35	3
chr15	88467322	88467323	two-quartet	-	chr15:88467323-88467358:-	FALSE	5'- GGACGCTGTTAGGGGTGGCGGGGGGTTGGCGGCGGTTCGAGAGGC -3' rG4seq-K -----------------------------------*---------	ENSG00000173867|ENSG00000173867.10;MRPL46|ENSG00000259494.2	ENST00000312475.5;ENST00000558531.1;ENST00000560703.1;ENST00000561140.1;ENST00000649547.1	CDS;non_coding	15	8	7	0		31	19	6	0
chr15	90233870	90233871	bulges	-	chr15:90233871-90233891:-	FALSE	5'- GGGGCGATGGGGGGCTCGGGCAGTCGCCTG -3' rG4seq-K --------------------*---------	CIB1|ENSG00000185043.12	ENST00000328649.11;ENST00000612800.1;ENST00000650306.1	5UTR;CDS	23	13	17	0		38	22	11	0
chr16	2268058	2268060	bulges	-	chr16:2268060-2268097:-	FALSE	5'- GGCGGCTGAGGAAAGCAGGAGGAGGTGGCGGCGGCGGGAAGATGGCT -3' rG4seq-K -------------------------------------**--------	RNPS1|ENSG00000205937.12	ENST00000301730.12;ENST00000320225.10;ENST00000561718.5;ENST00000562690.5;ENST00000564311.5;ENST00000564822.1;ENST00000566458.5;ENST00000567147.5;ENST00000569598.6;ENST00000570051.5	5UTR	62	26	42	6		71	28	23	4
chr16	30892923	30892924	bulges	-	chr16:30893211-30893230:-,chr16:30892925-30892948:-	TRUE	5'- GGTGGATCCCCAGGAGGAGGAGCGAAGGCGGGCAGGTGGCGGGGCAGAGAGA -3' rG4seq-K -------------------------------------------*--------	BCL7C|ENSG00000099385.12;ENSG00000262721|ENSG00000262721.1	ENST00000215115.5;ENST00000380317.8;ENST00000572471.1;ENST00000572628.5;ENST00000574418.5	CDS;non_coding	15	11	10	1		15	15	7	0
chr16	69118112	69118113	canonical/G3L1-7	-	chr16:69118113-69118144:-	FALSE	5'- GGGAATTAGGGTGGGGGTGGGGGATGAAGGGAAGAAATCAC -3' rG4seq-K -------------------------------*---------	CHTF8|ENSG00000168802.14;DERPC|ENSG00000286140.2	ENST00000306585.9;ENST00000448552.7;ENST00000518041.5;ENST00000519520.7;ENST00000523421.5	3UTR	42	19	11	1		50	26	6	0
chr16	69118122	69118123	canonical/G3L1-7	-	chr16:69118121-69118144:-	FALSE	5'- GGGAATTAGGGTGGGGGTGGGGGATGAAGGGAA -3' rG4seq-K ---------------------*-----------	CHTF8|ENSG00000168802.14;DERPC|ENSG00000286140.2	ENST00000306585.9;ENST00000448552.7;ENST00000518041.5;ENST00000519520.7;ENST00000523421.5	3UTR	10	8	9	1		14	9	7	0
chr16	87830075	87830076	canonical/G3L1-7	-	chr16:87830076-87830094:-	FALSE	5'- GGGCTGGGTTGGGTAGGGTGTTCTGGCT -3' rG4seq-K ------------------*---------	SLC7A5|ENSG00000103257.9	ENST00000261622.5;ENST00000565644.5	3UTR	67	63	10	1		101	96	9	3
chr16	87830642	87830643	two-quartet	-	chr16:87830643-87830656:-	FALSE	5'- GGTTGGTGGGGGGTCCAGTCTGT -3' rG4seq-K -------------*---------	SLC7A5|ENSG00000103257.9	ENST00000261622.5;ENST00000565644.5	3UTR	35	21	12	0		44	22	13	2
chr16	87832370	87832372	canonical/G3L1-7	-	chr16:87832371-87832402:-	FALSE	5'- GGGAGGGGGTGGGGGATCTGGGCAAGGTGGGTGATTCCTCC -3' rG4seq-K ------------------------------**---------	SLC7A5|ENSG00000103257.9	ENST00000261622.5;ENST00000565644.5	3UTR	120	67	29	2		178	84	25	4
chr17	1344941	1344943	two-quartet	-	chr17:1344942-1344965:-	FALSE	5'- GGTTAAAGGTGGTTTGGGGAGGGACTTCGTTGT -3' rG4seq-K ----------------------**---------	YWHAE|ENSG00000108953.17	ENST00000264335.13;ENST00000466227.6;ENST00000571732.5;ENST00000573026.1	3UTR	180	121	83	9		241	149	57	12
chr17	2689777	2689778	canonical/G3L1-7	-	chr17:2689778-2689808:-	FALSE	5'- GGGCCGGGGGCGAGGCTGGGGGAAGCGGGGCCCAATTACG -3' rG4seq-K ------------------------------*---------	CLUH|ENSG00000132361.18	ENST00000435359.5;ENST00000570628.6;ENST00000574426.7;ENST00000575014.5;ENST00000651024.2	3UTR	46	25	13	2		49	21	10	0
chr17	7260196	7260197	longloop	-	chr17:7260197-7260228:-	FALSE	5'- GGGTTGGGGGTGGGGGGGTGCCGTTGGTGGGAGAGACAAAA -3' rG4seq-K -------------------------------*---------	CLDN7|ENSG00000181885.18;ENSG00000262302|ENSG00000262302.1	ENST00000360325.11;ENST00000397317.8;ENST00000538261.7;ENST00000577138.1	3UTR;non_coding	264	52	63	2		308	52	49	2
chr17	7260209	7260214	canonical/G3L1-7	-	chr17:7260210-7260228:-	FALSE	5'- GGGTTGGGGGTGGGGGGGTGCCGTTGGT -3' rG4seq-K --------------*****---------	CLDN7|ENSG00000181885.18;ENSG00000262302|ENSG00000262302.1	ENST00000360325.11;ENST00000397317.8;ENST00000538261.7;ENST00000577138.1	3UTR;non_coding	321	145	262	8		426	187	172	7
chr17	29263856	29263858	canonical/G3L1-7	-	chr17:29263857-29263877:-	FALSE	5'- GGGGCGGGGATAGGGGAGGGCATTGAAGTT -3' rG4seq-K -------------------**---------	NUFIP2|ENSG00000108256.9	ENST00000225388.9	3UTR	67	50	6	1		93	64	16	1
chr17	39404857	39404858	canonical/G3L1-7	-	chr17:39404857-39404880:-	FALSE	5'- GGGTGGGGGGTGGGGTGGTGGGGACAAACAACG -3' rG4seq-K ----------------------*----------	MED1|ENSG00000125686.12	ENST00000300651.11;ENST00000394287.7	3UTR	16	8	9	0		32	16	10	1
chr17	39921774	39921775	canonical/G3L1-7	-	chr17:39921775-39921792:-	FALSE	5'- GGGAGGGAGGGGTAGGGACAGAAGCTA -3' rG4seq-K -----------------*---------	ORMDL3|ENSG00000172057.10	ENST00000304046.7;ENST00000579695.5	3UTR	36	29	7	2		33	30	6	2
chr17	41523671	41523672	canonical/G3L1-7	-	chr17:41523672-41523696:-	FALSE	5'- GGGTAGAGGGATGGGAAGGAAGGGACCCTTACCC -3' rG4seq-K ------------------------*---------	KRT19|ENSG00000171345.13	ENST00000361566.7	3UTR	189	57	95	0		228	75	79	1
chr17	41523680	41523681	longloop	-	chr17:41523681-41523707:-	FALSE	5'- GGGTGTCTTCTGGGTAGAGGGATGGGAAGGAAGGGA -3' rG4seq-K --------------------------*---------	KRT19|ENSG00000171345.13	ENST00000361566.7	3UTR	108	67	104	10		122	77	68	8
chr17	41528186	41528187	two-quartet	-	chr17:41528185-41528202:-	FALSE	5'- GGAGGCCTGGGCGGCGGCTCCGTGCGT -3' rG4seq-K ---------------*-----------	KRT19|ENSG00000171345.13	ENST00000361566.7;ENST00000455635.1	CDS	84	31	85	6		121	40	92	7
chr17	41976517	41976518	canonical/G3L1-7	-	chr17:41976518-41976549:-	FALSE	5'- GGGCAGGGGAGGGAGGCGGGGGTGGACAGGGAGGCAGCTTG -3' rG4seq-K -------------------------------*---------	DNAJC7|ENSG00000168259.17	ENST00000316603.12;ENST00000426588.7;ENST00000457167.9;ENST00000585866.6;ENST00000586335.2;ENST00000587727.6;ENST00000588814.5;ENST00000589576.6;ENST00000590197.2;ENST00000590774.6;ENST00000674166.1;ENST00000674179.1;ENST00000674214.1;ENST00000674233.1;ENST00000674249.1;ENST00000674306.1;ENST00000674355.1;ENST00000674472.1;ENST00000674481.1;ENST00000674504.1	3UTR	41	28	18	3		55	35	11	0
chr17	42125075	42125077	canonical/G3L1-7	-	chr17:42125075-42125103:-	FALSE	5'- GGGTGGGTAAGGGGGGGAGTGGGAGGGGACGGAACCAA -3' rG4seq-K --------------------------**----------	ENSG00000267261|ENSG00000267261.5;RAB5C|ENSG00000108774.15	ENST00000346213.9;ENST00000393860.7;ENST00000585562.5;ENST00000592248.5;ENST00000592574.1	3UTR;non_coding	69	43	22	0		82	51	34	0
chr17	42125666	42125668	canonical/G3L1-7	-	chr17:42125666-42125685:-	FALSE	5'- GGGGGGGCAGGGGGAGGGGTCCACCATGA -3' rG4seq-K -----------------**----------	ENSG00000267261|ENSG00000267261.5;RAB5C|ENSG00000108774.15	ENST00000346213.9;ENST00000393860.7;ENST00000547517.5;ENST00000585562.5;ENST00000592248.5;ENST00000592574.1	3UTR	45	29	26	0		50	20	22	1
chr17	48604806	48604807	longloop	-	chr17:48604807-48604833:-	FALSE	5'- GGGAGAGGGAGAGAAGGAGGGGTGGGAATTACACAA -3' rG4seq-K --------------------------*---------	HOXB3|ENSG00000120093.12;HOXB6|ENSG00000108511.10	ENST00000225648.4;ENST00000484302.3;ENST00000552000.2	5UTR;non_coding	47	44	14	1		48	41	9	0
chr17	48612441	48612442	canonical/G3L1-7	-	chr17:48612442-48612457:-	FALSE	5'- GGGGGGGAGGGAGGGCTAATTATAT -3' rG4seq-K ---------------*---------	HOXB7|ENSG00000260027.5;HOXB8|ENSG00000120068.7	ENST00000239144.5;ENST00000498634.2;ENST00000567101.2	3UTR;non_coding	62	55	14	2		60	48	8	0
chr17	50382765	50382768	canonical/G3L1-7	-	chr17:50382765-50382791:-	FALSE	5'- GGGAGGTGGCGGGGGGGCGTGGGGGGCAGTTACCTG -3' rG4seq-K -----------------------***----------	LRRC59|ENSG00000108829.10	ENST00000225972.8;ENST00000503118.2	3UTR	241	80	117	10		349	98	90	3
chr17	50383108	50383110	bulges	-	chr17:50383109-50383132:-	FALSE	5'- GGGAGGGCTGGTTGCTTGTCGGGTGACAGAGCT -3' rG4seq-K ----------------------**---------	LRRC59|ENSG00000108829.10	ENST00000225972.8;ENST00000503118.2	CDS	55	26	30	2		71	38	33	3
chr17	56890364	56890365	bulges	-	chr17:56890364-56890391:-	FALSE	5'- GGGAGGGAGGGAAAGAGCTAAAGAGGGTCACACAAGT -3' rG4seq-K --------------------------*----------	TRIM25|ENSG00000121060.19	ENST00000316881.9;ENST00000648772.1;ENST00000682766.1	3UTR	19	17	11	0		28	27	7	1
chr17	58003622	58003624	potential G-quadruplex & G>=40%	-	chr17:58003622-58003682:-	FALSE	5'- ATCTCCTTGGAAGGATTCAGCACGAGTAGATGGTAAACATTTAAAGGGGAAAGGGGGGGTTTGTTTAAAA -3' rG4seq-K ----------------------------------------------------------**----------	ENSG00000266086|ENSG00000266086.3;SRSF1|ENSG00000136450.13	ENST00000258962.5;ENST00000578794.2;ENST00000581497.1;ENST00000582730.6;ENST00000665125.1	3UTR	39	13	82	1		42	18	47	3
chr17	58006406	58006407	bulges	-	chr17:58006405-58006432:-	FALSE	5'- GAGGCGGCGGCGGGGGTGGAGGTGGCGGAGCTCCCCG -3' rG4seq-K -------------------------*-----------	ENSG00000266086|ENSG00000266086.3;SRSF1|ENSG00000136450.13	ENST00000258962.5;ENST00000578430.1;ENST00000578794.2;ENST00000581979.5;ENST00000582730.6;ENST00000583741.1;ENST00000584773.5;ENST00000585096.1	3UTR;CDS	31	23	20	0		36	25	9	1
chr17	65529816	65529817	canonical/G3L1-7	-	chr17:65529814-65529836:-	FALSE	5'- GGGCCTTCGGGAGGGCGGGGGGAGGTTGATTT -3' rG4seq-K -------------------*------------	AXIN2|ENSG00000168646.14	ENST00000307078.10;ENST00000618960.4	3UTR	44	38	8	1		63	55	11	3
chr17	74950990	74950991	bulges	-	chr17:74950991-74951016:-	FALSE	5'- GGGGCATGGTGTGGGGTGGTGAGGGTCTCCTGCTA -3' rG4seq-K -------------------------*---------	HID1|ENSG00000167861.16	ENST00000425042.7;ENST00000532395.5	3UTR	30	19	7	0		46	24	6	0
chr17	81510369	81510371	potential G-quadruplex & G>=40%	-	chr17:81510369-81510429:-	FALSE	5'- TGTGGCTTGGTCACTTCGTGGCTAAGGTAAGAACGTGCTTGTGGAAGACAAGTCTGTGGCTTGGTGAGTC -3' rG4seq-K ----------------------------------------------------------**----------	ACTG1|ENSG00000184009.13	ENST00000570382.2;ENST00000572105.7;ENST00000573283.7;ENST00000574671.6;ENST00000575087.5;ENST00000575842.5;ENST00000576209.5;ENST00000576214.3;ENST00000576544.6;ENST00000576917.5;ENST00000615544.5;ENST00000679410.1;ENST00000679480.1;ENST00000679535.1;ENST00000679778.1;ENST00000680227.1;ENST00000680727.1;ENST00000681052.1;ENST00000681092.1;ENST00000681842.1	3UTR	38	9	92	5		34	5	81	1
chr17	81511092	81511093	potential G-quadruplex & G>=40%	-	chr17:81511092-81511152:-	FALSE	5'- TCCTCGGTGACACAGCATCACTAAGGGAGGGCTCTGTCCCCTAGGTATGGAATCTTGCGGCATCCACGAG -3' rG4seq-K -----------------------------------------------------------*----------	ACTG1|ENSG00000184009.13	ENST00000570382.2;ENST00000571691.6;ENST00000571721.6;ENST00000572105.7;ENST00000573283.7;ENST00000574671.6;ENST00000575087.5;ENST00000575659.6;ENST00000575842.5;ENST00000575994.6;ENST00000576209.5;ENST00000576214.3;ENST00000576544.6;ENST00000576917.5;ENST00000615544.5;ENST00000644774.2;ENST00000679410.1;ENST00000679480.1;ENST00000679535.1;ENST00000679778.1;ENST00000680227.1;ENST00000680727.1;ENS…	3UTR;CDS	61	20	105	12		101	37	109	14
chr17	81511966	81511967	potential G-quadruplex & G>=40%	-	chr17:81511966-81512026:-	FALSE	5'- CGACATGGAGAAGATCTGGCACCACACCTTCTACAACGAGCTGCGCGTGGCCCCGGAGGAGCACCCAGTG -3' rG4seq-K -----------------------------------------------------------*----------	ACTG1|ENSG00000184009.13	ENST00000570382.2;ENST00000571691.6;ENST00000571721.6;ENST00000572105.7;ENST00000573283.7;ENST00000574671.6;ENST00000575087.5;ENST00000575659.6;ENST00000575842.5;ENST00000575994.6;ENST00000576209.5;ENST00000576214.3;ENST00000576544.6;ENST00000576917.5;ENST00000615544.5;ENST00000644774.2;ENST00000679410.1;ENST00000679480.1;ENST00000679535.1;ENST00000679778.1;ENST00000680227.1;ENST00000680727.1;ENS…	3UTR;CDS	143	32	256	21		186	44	224	19
chr17	81845150	81845152	two-quartet	-	chr17:81845151-81845180:-	FALSE	5'- GGAGAGCGGTGGCCAGGATGGGGCAGGGGATGATGACGT -3' rG4seq-K ----------------------------**---------	P4HB|ENSG00000185624.16	ENST00000331483.9;ENST00000415593.6;ENST00000439918.7;ENST00000466567.3;ENST00000472244.6;ENST00000473021.2;ENST00000474712.2;ENST00000476482.2;ENST00000477607.7;ENST00000484286.2;ENST00000570907.6;ENST00000571507.6;ENST00000571617.2;ENST00000574914.2;ENST00000575069.6;ENST00000576390.6;ENST00000679366.1;ENST00000679396.1;ENST00000679439.1;ENST00000679455.1;ENST00000679470.1;ENST00000679628.1;ENS…	3UTR;CDS	110	42	147	25		161	57	104	8
chr17	81932478	81932479	two-quartet	-	chr17:81932479-81932502:-	FALSE	5'- GGGAGGGTGGTTACTGTGGGTGGAATAGTGGAG -3' rG4seq-K -----------------------*---------	PYCR1|ENSG00000183010.17	ENST00000329875.13;ENST00000337943.9;ENST00000403172.8;ENST00000619204.4;ENST00000629768.2	3UTR	48	16	10	0		64	22	13	0
chr17	81933076	81933077	longloop	-	chr17:81933076-81933106:-	FALSE	5'- GGGCCAGCCAGGGACATAGCCAGGGAGGGGCCACATCACT -3' rG4seq-K -----------------------------*----------	PYCR1|ENSG00000183010.17	ENST00000329875.13;ENST00000337943.9;ENST00000402252.6;ENST00000403172.8;ENST00000577756.5;ENST00000584848.5;ENST00000619204.4;ENST00000629768.2	3UTR	23	17	15	2		22	11	12	0
chr17	82615171	82615173	bulges	-	chr17:82615171-82615197:-	FALSE	5'- GGCGTGTGCGGGGCGGGGACGGGGGGTCTCCTGGTT -3' rG4seq-K ------------------------**----------	WDR45B|ENSG00000141580.16	ENST00000392325.9;ENST00000572583.5;ENST00000576517.1	3UTR	42	22	29	3		43	24	20	2
chr18	50281434	50281435	bulges	-	chr18:50281433-50281470:-	FALSE	5'- GCGGAGGAGGAGGAAGGGGAGGAGGGCGAGGCGGGAGGTGCAGGAGG -3' rG4seq-K -----------------------------------*-----------	MBD1|ENSG00000141644.18	ENST00000269468.10;ENST00000269471.9;ENST00000339998.10;ENST00000347968.7;ENST00000353909.7;ENST00000382948.9;ENST00000398493.5;ENST00000457839.6;ENST00000585672.5;ENST00000586118.5;ENST00000587605.5;ENST00000589758.1;ENST00000589867.2;ENST00000590208.5;ENST00000590215.1;ENST00000591416.5	5UTR	12	7	8	0		12	9	8	0
chr19	291319	291320	bulges	-	chr19:291320-291352:-	FALSE	5'- GGGGGTCGCGGGGACCATGCAGCGGAGGTGGGTCTTCGTGCT -3' rG4seq-K --------------------------------*---------	PLPP2|ENSG00000141934.10	ENST00000269812.7;ENST00000434325.7;ENST00000591572.2;ENST00000633125.1	5UTR;CDS	13	10	7	1		14	8	8	0
chr19	1009959	1009960	potential G-quadruplex & G>=40%	-	chr19:1009959-1010019:-	FALSE	5'- GGCGGAGGTGTGGAGGAGAGGCCGGCTTGGGGTGGGGCCTCGCGCCCTAGTGCCGGCCGGCCTCAGCCCG -3' rG4seq-K -----------------------------------------------------------*----------	TMEM259|ENSG00000182087.14	ENST00000333175.9;ENST00000356663.8;ENST00000586704.5;ENST00000592052.1;ENST00000592590.6;ENST00000592618.5;ENST00000593068.7	3UTR	32	14	14	1		40	23	15	3
chr19	2038178	2038179	bulges	-	chr19:2038176-2038196:-	FALSE	5'- GGGGGGCCTGGGGGTGGGGGCCTCGGAGAC -3' rG4seq-K -----------------*------------	MKNK2|ENSG00000099875.16	ENST00000250896.9;ENST00000309340.11;ENST00000587416.5;ENST00000589441.5;ENST00000591142.5	3UTR	27	22	15	0		37	29	12	0
chr19	2039079	2039080	bulges	-	chr19:2039079-2039105:-	FALSE	5'- GGTGGCTTGGTTGGGGAAGGGAGGGGCTGCCTGTCT -3' rG4seq-K -------------------------*----------	MKNK2|ENSG00000099875.16	ENST00000250896.9;ENST00000309340.11;ENST00000587416.5;ENST00000588014.5;ENST00000589441.5;ENST00000591142.5	3UTR	37	30	21	1		43	34	8	0
chr19	2101562	2101563	canonical/G3L1-7	-	chr19:2101563-2101582:-	FALSE	5'- GGGCAGGGCGGGGCCAGGGACGCCAAAGA -3' rG4seq-K -------------------*---------	AP3D1|ENSG00000065000.19	ENST00000345016.9;ENST00000585652.5;ENST00000586370.6;ENST00000589223.5;ENST00000643116.3;ENST00000644728.1	3UTR	40	32	18	2		45	27	9	0
chr19	2101714	2101715	bulges	-	chr19:2101715-2101747:-	FALSE	5'- GACGGTTGCGTCCGGGGGAGGGGAAGGAAGGGCCGCTGTCGC -3' rG4seq-K --------------------------------*---------	AP3D1|ENSG00000065000.19	ENST00000345016.9;ENST00000585652.5;ENST00000586370.6;ENST00000589223.5;ENST00000591650.1;ENST00000643116.3;ENST00000644728.1	3UTR	24	9	23	0		24	12	15	1
chr19	2429684	2429686	bulges	-	chr19:2429684-2429704:-	FALSE	5'- GGGGTGGCGTGGGGCTGGGGCACCCTCCGA -3' rG4seq-K ------------------**----------	LMNB2|ENSG00000176619.13	ENST00000325327.4;ENST00000475819.1;ENST00000532465.1	3UTR	62	34	24	0		84	57	14	0
chr19	2430129	2430130	bulges	-	chr19:2430129-2430150:-	FALSE	5'- GGGAGGGGAGATGTGGAGGGGACACATCTGG -3' rG4seq-K --------------------*----------	LMNB2|ENSG00000176619.13	ENST00000325327.4;ENST00000475819.1;ENST00000532465.1	3UTR	40	35	9	1		46	44	9	0
chr19	2430200	2430202	canonical/G3L1-7	-	chr19:2430201-2430225:-	FALSE	5'- GGGCAGGGGAGGGGAAGACCTGGGGAAGGAAGAA -3' rG4seq-K -----------------------**---------	LMNB2|ENSG00000176619.13	ENST00000325327.4;ENST00000475819.1;ENST00000532465.1	3UTR	34	17	42	1		57	23	32	0
chr19	3053207	3053208	canonical/G3L1-7	-	chr19:3053207-3053230:-	FALSE	5'- GGGAGGAGCAGGGTGAGGGTGGGCGACCCAGGA -3' rG4seq-K ----------------------*----------	TLE5|ENSG00000104964.15	ENST00000221561.12;ENST00000327141.9;ENST00000586742.5;ENST00000587393.5;ENST00000592414.1	3UTR	21	11	11	0		32	21	7	1
chr19	3053775	3053777	canonical/G3L1-7	-	chr19:3053776-3053803:-	FALSE	5'- GGGAGGTTGGGAGGGGGGACAGAGGGGAGACAGAGGC -3' rG4seq-K --------------------------**---------	TLE5|ENSG00000104964.15	ENST00000221561.12;ENST00000327141.9;ENST00000586742.5;ENST00000586839.1;ENST00000587393.5;ENST00000590067.5;ENST00000592330.5;ENST00000592414.1	3UTR	88	41	55	4		136	72	54	3
chr19	3958912	3958913	canonical/G3L1-7	-	chr19:3958912-3958932:-	FALSE	5'- GGGGTGGGTGTGGGACGGGGCTGCTTCTCT -3' rG4seq-K -------------------*----------	DAPK3|ENSG00000167657.14	ENST00000301264.7;ENST00000545797.7;ENST00000595279.1	3UTR	45	34	10	1		43	35	9	1
chr19	3976289	3976291	canonical/G3L1-7	-	chr19:3976290-3976312:-	FALSE	5'- GGGGAGGGGGAGGCGGGATGGGACACCCAACA -3' rG4seq-K ---------------------**---------	EEF2|ENSG00000167658.16	ENST00000309311.7;ENST00000600794.1	3UTR;CDS	1569	529	380	13		2066	714	349	15
chr19	3976294	3976296	canonical/G3L1-7	-	chr19:3976295-3976321:-	FALSE	5'- GGGCCGGTCGGGGAGGGGGAGGCGGGATGGGACACC -3' rG4seq-K -------------------------**---------	EEF2|ENSG00000167658.16	ENST00000309311.7;ENST00000600794.1	3UTR;CDS	718	385	381	22		974	527	320	23
chr19	3982371	3982372	longloop	-	chr19:3982372-3982401:-	FALSE	5'- GGGCTTTGGGTCTGGCCTCCACGGGTGGGCCTTCACCCT -3' rG4seq-K -----------------------------*---------	EEF2|ENSG00000167658.16	ENST00000309311.7;ENST00000598436.1	CDS	84	23	95	5		95	35	101	4
chr19	3983219	3983220	potential G-quadruplex & G>=40%	-	chr19:3983219-3983279:-	FALSE	5'- CTTCTACGAGCTCTCGGAGAATGACTTGAACTTCATCAAGCAGAGCAAGGACGGTGCCGGCTTCCTCATC -3' rG4seq-K -----------------------------------------------------------*----------	EEF2|ENSG00000167658.16	ENST00000309311.7;ENST00000600720.1	CDS	63	15	83	2		105	28	80	6
chr19	4361407	4361408	canonical/G3L1-7	-	chr19:4361407-4361437:-	FALSE	5'- GGGTGGGGGGGCTTATCTGGGTGGGTGGGGATGCCTGTTT -3' rG4seq-K -----------------------------*----------	SH3GL1|ENSG00000141985.9	ENST00000269886.7;ENST00000417295.6;ENST00000598564.5	3UTR	41	34	7	1		42	37	6	0
chr19	4657710	4657712	longloop	-	chr19:4657710-4657740:-	FALSE	5'- GGGGCACAAAGAGGGTGGGGAACATGGGGGCTATGCTGGG -3' rG4seq-K ----------------------------**----------	MYDGF|ENSG00000074842.8	ENST00000262947.8;ENST00000599761.5	3UTR	27	23	21	1		25	17	17	1
chr19	10119655	10119656	bulges	-	chr19:10119653-10119676:-,chr19:10119252-10119255:-	TRUE	5'- GGTGGAGGAGGAGGGGGAGGACGGCGTCATCCCAAA -3' rG4seq-K --------------------*---------------	EIF3G|ENSG00000130811.12	ENST00000253108.9;ENST00000587146.5;ENST00000587168.1;ENST00000587681.5;ENST00000587993.5;ENST00000588709.5;ENST00000589009.5;ENST00000589454.5;ENST00000590940.5;ENST00000592485.1;ENST00000593066.5;ENST00000593095.5	CDS	25	15	21	2		18	10	28	2
chr19	12763126	12763127	canonical/G3L1-7	-	chr19:12763127-12763143:-	FALSE	5'- GGGGAGGGAGGGCGGGAGGTAGATAT -3' rG4seq-K ----------------*---------	HOOK2|ENSG00000095066.12	ENST00000264827.9;ENST00000397668.8;ENST00000678590.1	3UTR	15	11	11	0		22	19	6	0
chr19	14477810	14477811	longloop	-	chr19:14477811-14477836:-	FALSE	5'- GGGAGGGAGGGACGATGGCGGTGGGTTTTTGTATC -3' rG4seq-K -------------------------*---------	GIPC1|ENSG00000123159.16	ENST00000345425.6;ENST00000393028.5;ENST00000393033.9;ENST00000585606.5	3UTR	45	29	24	4		99	70	18	1
chr19	14515831	14515832	canonical/G3L1-7	-	chr19:14515832-14515854:-	FALSE	5'- GGGTGGGAGGGCCCAGGGAGGGCTTTCGTACT -3' rG4seq-K ----------------------*---------	DNAJB1|ENSG00000132002.9	ENST00000254322.3;ENST00000396969.8;ENST00000594099.6;ENST00000595139.2;ENST00000595992.6;ENST00000596075.2;ENST00000596853.6;ENST00000598235.2;ENST00000598692.2;ENST00000601533.6;ENST00000676515.1;ENST00000676577.1;ENST00000676982.1;ENST00000677204.1;ENST00000677762.1;ENST00000677848.1;ENST00000678009.1;ENST00000678098.1;ENST00000678338.1;ENST00000679223.1	3UTR	157	75	21	2		186	87	15	1
chr19	14515835	14515836	two-quartet	-	chr19:14515837-14515865:-	FALSE	5'- GGACCATGAGAGGGTGGGAGGGCCCAGGGAGGGCTTTC -3' rG4seq-K -----------------------------*--------	DNAJB1|ENSG00000132002.9	ENST00000254322.3;ENST00000396969.8;ENST00000594099.6;ENST00000595139.2;ENST00000595992.6;ENST00000596075.2;ENST00000596853.6;ENST00000598235.2;ENST00000598692.2;ENST00000601533.6;ENST00000676515.1;ENST00000676577.1;ENST00000676982.1;ENST00000677204.1;ENST00000677762.1;ENST00000677848.1;ENST00000678009.1;ENST00000678098.1;ENST00000678338.1;ENST00000679223.1	3UTR	77	74	19	3		96	89	12	1
chr19	14518350	14518353	bulges	-	chr19:14518351-14518375:-	FALSE	5'- GGGTCGGCGGGCCGCAGGAGGGGGTCATGGGTAA -3' rG4seq-K ----------------------***---------	DNAJB1|ENSG00000132002.9	ENST00000254322.3;ENST00000396969.8;ENST00000594099.6;ENST00000595139.2;ENST00000595992.6;ENST00000596075.2;ENST00000596853.6;ENST00000598692.2;ENST00000601533.6;ENST00000676515.1;ENST00000676982.1;ENST00000677762.1;ENST00000677848.1;ENST00000678009.1;ENST00000678098.1;ENST00000678338.1;ENST00000679223.1	5UTR	86	27	90	0		86	22	35	4
chr19	15913594	15913595	two-quartet	-	chr19:15913592-15913612:-	FALSE	5'- GGGAGGTGAGTGGGTGGAGGCAGGGTGACG -3' rG4seq-K -----------------*------------	CYP4F11|ENSG00000171903.17	ENST00000248041.12;ENST00000326742.12;ENST00000402119.9;ENST00000591841.1;ENST00000620614.4	3UTR	13	9	7	0		21	21	8	0
chr19	18541836	18541837	bulges	-	chr19:18541837-18541871:-	FALSE	5'- GAGGGTGAGGAGGAAGAGGAGGAGGAAGAGGAGGAAGAGGATGA -3' rG4seq-K ----------------------------------*---------	FKBP8|ENSG00000105701.16	ENST00000222308.8;ENST00000544835.7;ENST00000594844.5;ENST00000596558.6;ENST00000597547.1;ENST00000597611.7;ENST00000597960.7;ENST00000599540.6;ENST00000601844.5;ENST00000608443.6	CDS	34	15	21	2		43	20	19	3
chr19	18919323	18919324	two-quartet	-	chr19:18919323-18919346:-	FALSE	5'- GGCGCCTCCGGCCCCCGGCCCGGCCTCCGGCGG -3' rG4seq-K ----------------------*----------	COPE|ENSG00000105669.14;ENSG00000268193|ENSG00000268193.5	ENST00000262812.9;ENST00000349893.8;ENST00000351079.8;ENST00000593484.1;ENST00000593827.1;ENST00000596918.5;ENST00000597646.5;ENST00000599964.1;ENST00000600932.5	CDS;non_coding	25	12	26	2		31	15	22	1
chr19	38836525	38836526	bulges	-	chr19:38836526-38836556:-	FALSE	5'- GCTGGAAATCTGCAGGGGGAGGGAGAGGGGAACTGTTATC -3' rG4seq-K ------------------------------*---------	ENSG00000268083|ENSG00000268083.5;HNRNPL|ENSG00000104824.18	ENST00000221419.10;ENST00000388749.7;ENST00000594769.5;ENST00000595164.5;ENST00000595443.5;ENST00000595804.5;ENST00000597731.1;ENST00000601449.5;ENST00000602021.1;ENST00000647557.1	3UTR;non_coding	68	51	22	1		74	62	12	2
chr19	38849837	38849838	bulges	-	chr19:38849836-38849871:-	FALSE	5'- GGTGAAGATGGCGGCGGCGGGCGGCGGAGGCGGCGGTGGCCGCTA -3' rG4seq-K ---------------------------------*-----------	HNRNPL|ENSG00000104824.18	ENST00000221419.10;ENST00000388749.7;ENST00000598985.5;ENST00000600873.5;ENST00000601047.5;ENST00000601449.5;ENST00000601813.1	CDS	27	14	21	1		45	16	17	0
chr19	39840623	39840624	bulges	-	chr19:39840624-39840664:-	FALSE	5'- GAGGAGGAGGTGGAGGCGGCGGCGGCGGTGGAGGAGGAGGAAGAGGTGGT -3' rG4seq-K ----------------------------------------*---------	FBL|ENSG00000105202.9	ENST00000221801.8;ENST00000594309.5;ENST00000594443.5;ENST00000597224.5;ENST00000597634.5;ENST00000598417.5;ENST00000599134.1;ENST00000599159.1;ENST00000601274.5	CDS	29	14	23	2		33	17	18	1
chr19	39840698	39840701	bulges	-	chr19:39840702-39840736:-	FALSE	5'- GTGGTGGTCGTGGAGGCCGAGGGGGCTTTGGCGGGGGCCGAGGT -3' rG4seq-K -----------------------------------***------	FBL|ENSG00000105202.9	ENST00000221801.8;ENST00000594309.5;ENST00000594443.5;ENST00000597224.5;ENST00000597634.5;ENST00000598417.5;ENST00000599134.1;ENST00000599159.1;ENST00000601274.5	CDS	47	17	33	0		67	27	30	4
chr19	40232448	40232449	canonical/G3L1-7	-	chr19:40232449-40232476:-	FALSE	5'- GGGAGGGGTGGGGTTGGTTCGGGTGGGTGAGGGTCTT -3' rG4seq-K ---------------------------*---------	AKT2|ENSG00000105221.18	ENST00000392038.7;ENST00000424901.5;ENST00000476266.5;ENST00000483166.5	3UTR	34	18	14	2		52	28	7	0
chr19	42247733	42247734	canonical/G3L1-7	-	chr19:42247733-42247755:-	FALSE	5'- GGGTGGGGGGATGGGAAGGGGGTGCCCTGAAA -3' rG4seq-K ---------------------*----------	ENSG00000268643|ENSG00000268643.2;ERF|ENSG00000105722.10	ENST00000222329.9;ENST00000594664.1;ENST00000676949.1	3UTR;non_coding	14	12	9	2		19	16	7	0
chr19	43607707	43607708	bulges	-	chr19:43607708-43607741:-	FALSE	5'- GGCGGGAGGAGGAGGAGGAAGAGGAGGAGGAGGGAACCTACCA -3' rG4seq-K ---------------------------------*---------	ZNF428|ENSG00000131116.12	ENST00000300811.8;ENST00000598676.1	CDS	29	14	18	1		37	17	9	0
chr19	46727498	46727499	bulges	-	chr19:46727498-46727523:-	FALSE	5'- GGGGGCGGGGAGGTGAGCCTGGGGGACTTGGCAGA -3' rG4seq-K ------------------------*----------	STRN4|ENSG00000090372.15	ENST00000263280.11;ENST00000391910.7;ENST00000435164.6;ENST00000539396.5;ENST00000594287.6;ENST00000594357.6;ENST00000595357.5;ENST00000599231.5;ENST00000600358.7;ENST00000601631.6;ENST00000602223.5	3UTR;CDS	13	8	7	0		23	17	9	0
chr19	46778844	46778845	two-quartet	-	chr19:46778845-46778874:-	FALSE	5'- GGCAAGATCGTGGAGATGGAGGATGTGGGTTTACTCTTT -3' rG4seq-K -----------------------------*---------	SLC1A5|ENSG00000105281.12	ENST00000412532.6;ENST00000434726.6;ENST00000542575.6;ENST00000593713.1;ENST00000594991.5	CDS	24	21	10	1		34	30	9	2
chr19	46782522	46782523	bulges	-	chr19:46784096-46784103:-,chr19:46782524-46782549:-	TRUE	5'- GGTGAAGGTGCCCGTGGGGCAGGAGGTGGAGGGGATGAACAT -3' rG4seq-K ---------------------------------*--------	SLC1A5|ENSG00000105281.12	ENST00000412532.6;ENST00000434726.6;ENST00000542575.6;ENST00000593713.1;ENST00000594991.5;ENST00000598022.1	5UTR;CDS	14	6	13	0		17	8	7	0
chr19	46787735	46787737	canonical/G3L1-7	-	chr19:46787735-46787762:-	FALSE	5'- GGGACTGGGGGTGTCGGGGGCCGGGGGTGCGCTGGCG -3' rG4seq-K -------------------------**----------	SLC1A5|ENSG00000105281.12	ENST00000542575.6	CDS	30	13	20	2		46	21	14	4
chr19	48382668	48382670	longloop	-	chr19:48382668-48382700:-	FALSE	5'- GGGGGGCCCGGGGCTCAAGTGCGGGAAGGGGGCTGGCCCGAG -3' rG4seq-K ------------------------------**----------	KDELR1|ENSG00000105438.9	ENST00000330720.7;ENST00000597017.5	3UTR	88	45	30	0		116	61	31	1
chr2	10787371	10787372	two-quartet	-	chr2:10787372-10787391:-	FALSE	5'- GGGGATTGGAGGGTTTGGGTACCCCGCCA -3' rG4seq-K -------------------*---------	PDIA6|ENSG00000143870.13	ENST00000272227.8;ENST00000381611.8;ENST00000404371.6;ENST00000404824.2;ENST00000540494.5;ENST00000617249.4	CDS	62	30	32	1		69	42	32	1
chr2	10812720	10812721	two-quartet	-	chr2:10812720-10812746:-	FALSE	5'- GGGCTGAAGCGGCGGCGGCGGTGGGGACTGCACGTA -3' rG4seq-K -------------------------*----------	PDIA6|ENSG00000143870.13	ENST00000272227.8;ENST00000381611.8;ENST00000404371.6;ENST00000404824.2;ENST00000489662.1;ENST00000540494.5;ENST00000617249.4	5UTR	28	9	33	1		30	16	21	0
chr2	10812768	10812769	canonical/G3L1-7	-	chr2:10812767-10812790:-	FALSE	5'- GGGGCGGGACGTGGGCGCGGGGGCGCGGCGTGC -3' rG4seq-K ---------------------*-----------	PDIA6|ENSG00000143870.13	ENST00000272227.8;ENST00000381611.8;ENST00000404371.6;ENST00000404824.2;ENST00000540494.5;ENST00000617249.4	5UTR	13	8	6	0		18	14	7	0
chr2	20032920	20032922	canonical/G3L1-7	-	chr2:20032921-20032944:-	FALSE	5'- GGGGGGTGGGAAGGGAAAGAGGGTACTTGCCAC -3' rG4seq-K ----------------------**---------	LAPTM4A|ENSG00000068697.7	ENST00000175091.5	3UTR	116	77	55	4		101	76	30	0
chr2	26190921	26190922	bulges	-	chr2:26190922-26190944:-	FALSE	5'- GGGTGGCCAGGGGTGGTGAGGGCAGTTCTGCA -3' rG4seq-K ----------------------*---------	HADHA|ENSG00000084754.12	ENST00000380649.8;ENST00000492433.2;ENST00000643057.1;ENST00000643063.1;ENST00000643233.1;ENST00000644428.1;ENST00000645274.1	3UTR	14	10	10	1		19	9	8	0
chr2	43222889	43222891	potential G-quadruplex & G>=40%	-	chr2:43222889-43222949:-	FALSE	5'- TAAAGACATGTAGCAATAACGGGGAGTGGGGGGGGAGTCTCACAGTGCCTTTGGAAGGGCCCGAACTTGC -3' rG4seq-K ----------------------------------------------------------**----------	ZFP36L2|ENSG00000152518.8	ENST00000282388.4	3UTR	37	18	12	1		32	18	12	0
chr2	43226552	43226554	canonical/G3L1-7	-	chr2:43226553-43226570:-	FALSE	5'- GGGGGGGGCGGGCCGGGCACCCCGGGG -3' rG4seq-K ----------------**---------	ZFP36L2|ENSG00000152518.8	ENST00000282388.4	5UTR	29	19	12	1		46	30	16	1
chr2	54973080	54973081	two-quartet	-	chr2:54973081-54973096:-	FALSE	5'- GGGGGAGGGTCAGGGAAGAACGAAC -3' rG4seq-K ---------------*---------	RTN4|ENSG00000115310.19	ENST00000317610.11;ENST00000337526.11;ENST00000357376.7;ENST00000357732.8;ENST00000394609.6;ENST00000394611.6;ENST00000404909.5;ENST00000405240.5;ENST00000485749.1;ENST00000486085.5;ENST00000491592.1	3UTR	29	21	24	2		46	31	24	1
chr2	55050169	55050170	bulges	-	chr2:55050170-55050207:-	FALSE	5'- GAGGACGAGGAGGAAGAAGAGGAGGAGGAAGAGGAGGACGAGGACGA -3' rG4seq-K -------------------------------------*---------	RTN4|ENSG00000115310.19	ENST00000317610.11;ENST00000337526.11;ENST00000357732.8;ENST00000394611.6;ENST00000404909.5;ENST00000427710.5	CDS	24	16	46	4		34	23	32	3
chr2	55050488	55050489	bulges	-	chr2:55050489-55050516:-	FALSE	5'- GGCGGCGGCAAGTGGGGACAGGGCGGGTGGCGCATCA -3' rG4seq-K ---------------------------*---------	RTN4|ENSG00000115310.19	ENST00000317610.11;ENST00000357732.8;ENST00000394611.6;ENST00000404909.5;ENST00000427710.5	5UTR	9	7	7	0		21	12	6	0
chr2	74461256	74461257	bulges	-	chr2:74461256-74461273:-	FALSE	5'- GGGAGGGAGAGGAGGGGAGCCAAGACA -3' rG4seq-K ----------------*----------	MOGS|ENSG00000115275.15	ENST00000409065.5;ENST00000448666.7;ENST00000452063.7;ENST00000462189.1;ENST00000462443.2;ENST00000647723.1;ENST00000647753.1;ENST00000647771.1;ENST00000647915.1;ENST00000648768.1;ENST00000648810.1;ENST00000649075.1;ENST00000649601.1;ENST00000649777.1;ENST00000649854.1;ENST00000690565.1	3UTR	39	34	12	0		41	36	8	0
chr2	74526695	74526696	two-quartet	-	chr2:74526696-74526723:-	FALSE	5'- GGATGGGTGGGTGGTAAAAAGGGAAGGATGAGGCTCC -3' rG4seq-K ---------------------------*---------	AUP1|ENSG00000115307.17	ENST00000377526.4;ENST00000425118.5;ENST00000463900.5;ENST00000466894.5	3UTR	15	9	12	1		15	6	17	0
chr2	127304784	127304785	two-quartet	-	chr2:127304785-127304802:-	FALSE	5'- GGTGTGGGGGTGGAGGGTATGGAAGAC -3' rG4seq-K -----------------*---------	MAP3K2|ENSG00000169967.17	ENST00000409947.5;ENST00000682094.1	3UTR	13	10	6	1		13	10	7	0
chr2	131048824	131048825	bulges	-	chr2:131048825-131048863:-	FALSE	5'- GGCGCAGCAGCAGGTGGCAGGGGTGTGGCTTGAGGTGGGTGGCAGCGT -3' rG4seq-K --------------------------------------*---------	FAM168B|ENSG00000152102.18	ENST00000389915.4;ENST00000409185.5	3UTR	13	7	7	0		32	20	6	0
chr2	131051188	131051189	two-quartet	-	chr2:131051189-131051204:-	FALSE	5'- GGGGCGAGGGGGAGGCCAGTGTCTG -3' rG4seq-K ---------------*---------	FAM168B|ENSG00000152102.18	ENST00000389915.4;ENST00000409185.5	3UTR	18	9	14	1		45	13	11	0
chr2	131051191	131051193	two-quartet	-	chr2:131051189-131051204:-	FALSE	5'- GGGGCGAGGGGGAGGCCAGTGTCTG -3' rG4seq-K -----------**------------	FAM168B|ENSG00000152102.18	ENST00000389915.4;ENST00000409185.5	3UTR	15	6	32	0		52	17	22	0
chr2	229921939	229921940	bulges	-	chr2:229921938-229921955:-	FALSE	5'- GGGGGGGGTGGGGGGAGCTAGTGGAAG -3' rG4seq-K ---------------*-----------	TRIP12|ENSG00000153827.14	ENST00000283943.9;ENST00000343290.5;ENST00000389044.8;ENST00000409677.5;ENST00000435716.5;ENST00000479037.5;ENST00000675453.1;ENST00000675903.1	5UTR	14	12	9	0		22	14	8	0
chr2	231455229	231455230	bulges	-	chr2:231455228-231455264:-	FALSE	5'- GAGGAGGCTTCCGAGGAGGCAGAGGAGGAGGAGGTGACCACAAGCC -3' rG4seq-K ----------------------------------*-----------	NCL|ENSG00000115053.17	ENST00000322723.9;ENST00000356936.6;ENST00000417652.6;ENST00000436894.2;ENST00000453992.6;ENST00000454824.6;ENST00000461347.5;ENST00000676514.1;ENST00000676690.1;ENST00000676798.1;ENST00000676913.1;ENST00000677703.1;ENST00000678131.1;ENST00000678246.1;ENST00000678364.1;ENST00000678405.1;ENST00000678729.1;ENST00000678828.1;ENST00000678849.1;ENST00000679348.1	3UTR;CDS	88	21	77	0		86	19	54	2
chr2	231455431	231455432	bulges	-	chr2:231455432-231455467:-	FALSE	5'- GGAGGACGAGGTGGTGGTAGAGGAGGCCGAGGAGGATTTGGTGGC -3' rG4seq-K -----------------------------------*---------	NCL|ENSG00000115053.17	ENST00000322723.9;ENST00000356936.6;ENST00000417652.6;ENST00000436894.2;ENST00000453992.6;ENST00000454824.6;ENST00000461347.5;ENST00000676514.1;ENST00000676690.1;ENST00000676798.1;ENST00000676913.1;ENST00000677703.1;ENST00000677786.1;ENST00000678131.1;ENST00000678246.1;ENST00000678364.1;ENST00000678405.1;ENST00000678729.1;ENST00000678828.1;ENST00000678849.1;ENST00000679348.1	3UTR;CDS	156	51	57	3		149	49	48	7
chr2	231455479	231455480	two-quartet	-	chr2:231455480-231455506:-	FALSE	5'- GGTGGCTTCGGGGGTCGTGGTGGAGGCAGAGGCGGC -3' rG4seq-K --------------------------*---------	NCL|ENSG00000115053.17	ENST00000322723.9;ENST00000356936.6;ENST00000417652.6;ENST00000436894.2;ENST00000453992.6;ENST00000454824.6;ENST00000461347.5;ENST00000676514.1;ENST00000676690.1;ENST00000676798.1;ENST00000676913.1;ENST00000677703.1;ENST00000677786.1;ENST00000678131.1;ENST00000678246.1;ENST00000678364.1;ENST00000678405.1;ENST00000678729.1;ENST00000678828.1;ENST00000678849.1;ENST00000679348.1	3UTR;CDS	91	36	48	2		100	41	44	2
chr2	231455482	231455483	two-quartet	-	chr2:231455480-231455506:-	FALSE	5'- GGTGGCTTCGGGGGTCGTGGTGGAGGCAGAGGCGGC -3' rG4seq-K -----------------------*------------	NCL|ENSG00000115053.17	ENST00000322723.9;ENST00000356936.6;ENST00000417652.6;ENST00000436894.2;ENST00000453992.6;ENST00000454824.6;ENST00000461347.5;ENST00000676514.1;ENST00000676690.1;ENST00000676798.1;ENST00000676913.1;ENST00000677703.1;ENST00000677786.1;ENST00000678131.1;ENST00000678246.1;ENST00000678364.1;ENST00000678405.1;ENST00000678729.1;ENST00000678828.1;ENST00000678849.1;ENST00000679348.1	3UTR;CDS	58	20	50	2		57	28	47	0
chr2	231455485	231455486	two-quartet	-	chr2:231455486-231455513:-	FALSE	5'- GGGTGAAGGTGGCTTCGGGGGTCGTGGTGGAGGCAGA -3' rG4seq-K ---------------------------*---------	NCL|ENSG00000115053.17	ENST00000322723.9;ENST00000356936.6;ENST00000417652.6;ENST00000436894.2;ENST00000453992.6;ENST00000454824.6;ENST00000461347.5;ENST00000676514.1;ENST00000676690.1;ENST00000676798.1;ENST00000676913.1;ENST00000677703.1;ENST00000677786.1;ENST00000678131.1;ENST00000678246.1;ENST00000678364.1;ENST00000678405.1;ENST00000678729.1;ENST00000678828.1;ENST00000678849.1;ENST00000679348.1	3UTR;CDS	38	10	51	1		27	9	47	2
chr2	231460670	231460671	bulges	-	chr2:231460671-231460696:-	FALSE	5'- GAGGAGGAGGAAGAAGAGGAGGAGGAAGAGCCTGT -3' rG4seq-K -------------------------*---------	NCL|ENSG00000115053.17	ENST00000322723.9;ENST00000356936.6;ENST00000417652.6;ENST00000436894.2;ENST00000453992.6;ENST00000454824.6;ENST00000461347.5;ENST00000494618.1;ENST00000676514.1;ENST00000676690.1;ENST00000676798.1;ENST00000676913.1;ENST00000677703.1;ENST00000677786.1;ENST00000678131.1;ENST00000678246.1;ENST00000678364.1;ENST00000678405.1;ENST00000678729.1;ENST00000678828.1;ENST00000678849.1;ENST00000679348.1	CDS	64	36	90	8		96	61	52	4
chr20	481473	481474	canonical/G3L1-7	-	chr20:481474-481501:-	FALSE	5'- GGGTGGGGGGTGGGGGGGAGGCAAGGGTTTACAGAGT -3' rG4seq-K ---------------------------*---------	CSNK2A1|ENSG00000101266.19	ENST00000217244.9;ENST00000349736.10;ENST00000400227.8;ENST00000619801.5;ENST00000643660.1;ENST00000643700.1;ENST00000644170.1;ENST00000645623.1;ENST00000645840.1;ENST00000645910.1;ENST00000646305.1;ENST00000646561.1	3UTR	48	34	16	1		62	51	12	5
chr20	647187	647188	two-quartet	-	chr20:647188-647210:-	FALSE	5'- GGGGAAGAGGTGTTGGGGCAGGAAGTGAGTCT -3' rG4seq-K ----------------------*---------	ENSG00000270299|ENSG00000270299.1;SRXN1|ENSG00000271303.2	ENST00000381962.4;ENST00000488788.2	3UTR	31	20	14	3		31	23	13	0
chr20	2470751	2470752	two-quartet	-	chr20:2470752-2470781:-	FALSE	5'- GGTAGCGGCGGCGGGAAATCGGCTGTGGGAGAGAGGCTA -3' rG4seq-K -----------------------------*---------	ENSG00000256566|ENSG00000256566.1;SNRPB|ENSG00000125835.20	ENST00000381342.7;ENST00000438552.6;ENST00000461548.1;ENST00000688423.1;ENST00000688775.1;ENST00000689440.1;ENST00000693393.1	5UTR;non_coding	14	11	12	1		10	7	16	2
chr20	3785128	3785129	bulges	-	chr20:3785126-3785166:-	FALSE	5'- GAGGAATTGGGGGAGGAAGAGGAGGTGGAGGAGGAGGGTGATGTTGATAG -3' rG4seq-K -------------------------------------*------------	CENPB|ENSG00000125817.8	ENST00000379751.5	CDS	17	15	13	0		19	15	7	1
chr20	17613810	17613812	canonical/G3L1-7	-	chr20:17613811-17613835:-	FALSE	5'- GGGGCGGGGCGGGAAGCGGGTGGGACCGGGCAGC -3' rG4seq-K -----------------------**---------	RRBP1|ENSG00000125844.17	ENST00000246043.8;ENST00000360807.8;ENST00000377807.6;ENST00000377813.6;ENST00000468428.1;ENST00000470422.5	3UTR	84	51	44	2		129	89	22	1
chr20	17620749	17620750	bulges	-	chr20:17620750-17620777:-	FALSE	5'- GTGGAGGAGGAGGAGCAGGTGTGGAGGGCCAAGGTGG -3' rG4seq-K ---------------------------*---------	RRBP1|ENSG00000125844.17	ENST00000246043.8;ENST00000360807.8;ENST00000377807.6;ENST00000377813.6;ENST00000455029.3;ENST00000470422.5	CDS	14	9	9	0		20	14	11	1
chr20	36046839	36046841	canonical/G3L1-7	-	chr20:36046840-36046863:-	FALSE	5'- GGGGTGGGGGAAGGGGGGGTGGGCAGAGGAGGT -3' rG4seq-K ----------------------**---------	NORAD|ENSG00000260032.2	ENST00000565493.2	non_coding	48	30	59	7		65	46	47	4
chr20	36050587	36050588	canonical/G3L1-7	-	chr20:36050588-36050615:-	FALSE	5'- GGGCGGCGCTGGGCGTGGTGGGCCGGGAAGTATGGCG -3' rG4seq-K ---------------------------*---------	NORAD|ENSG00000260032.2	ENST00000565493.2	non_coding	49	42	21	6		66	53	20	1
chr20	45326667	45326668	two-quartet	-	chr20:45326668-45326684:-	FALSE	5'- GGGGGGGAGGATGGGGAAAAGAGCTG -3' rG4seq-K ----------------*---------	SDC4|ENSG00000124145.6	ENST00000372733.3	3UTR	32	28	11	1		44	41	12	1
chr20	49633294	49633295	bulges	-	chr20:49633294-49633313:-	FALSE	5'- GTTTTGGGGGGTGGGGGGGTATTTGCAAG -3' rG4seq-K ------------------*----------	B4GALT5|ENSG00000158470.5	ENST00000371711.4	3UTR	26	21	17	4		23	17	9	1
chr20	49635755	49635756	canonical/G3L1-7	-	chr20:49635756-49635780:-	FALSE	5'- GGGGATTGAGGGTGGAGGGGAGGGTGTTTGGGAA -3' rG4seq-K ------------------------*---------	B4GALT5|ENSG00000158470.5	ENST00000371711.4	3UTR	34	26	15	2		47	38	7	2
chr20	59033944	59033946	bulges	-	chr20:59033944-59033981:-	FALSE	5'- GGGGGCGGTGGGGAAGAACAAGCATAATGGTAGGGGGAGGCTTGGCC -3' rG4seq-K -----------------------------------**----------	PRELID3B|ENSG00000101166.16	ENST00000355937.9	3UTR	47	30	30	0		47	29	15	0
chr20	63495047	63495049	bulges	-	chr20:63495048-63495072:-	FALSE	5'- GGGCGTGGGCGAGTTCGAGGCGGGCATCTCCAAG -3' rG4seq-K -----------------------**---------	EEF1A2|ENSG00000101210.13	ENST00000217182.6;ENST00000298049.12;ENST00000642899.1;ENST00000645357.1;ENST00000645586.1;ENST00000675519.1	3UTR;CDS	77	17	108	6		105	24	69	1
chr20	63558296	63558297	canonical/G3L1-7	-	chr20:63558297-63558324:-	FALSE	5'- GGGCTCGGGGGTTGGGGGGTGCCGGGGCGATGCTTCC -3' rG4seq-K ---------------------------*---------	HELZ2|ENSG00000130589.16	ENST00000427522.6	3UTR	69	38	12	0		104	53	10	0
chr20	63558305	63558307	longloop	-	chr20:63558305-63558336:-	FALSE	5'- GGGCTGCGCAGTGGGCTCGGGGGTTGGGGGGTGCCGGGGCG -3' rG4seq-K -----------------------------**----------	HELZ2|ENSG00000130589.16	ENST00000427522.6	3UTR	13	9	14	0		38	19	21	1
chr20	63572693	63572694	canonical/G3L1-7	-	chr20:63572693-63572716:-	FALSE	5'- GGGCAGCGGGGCCCAGGGAGGGGCAGGCCGGGC -3' rG4seq-K ----------------------*----------	HELZ2|ENSG00000130589.16	ENST00000370082.1;ENST00000479540.5	non_coding	19	13	7	1		23	18	6	0
chr21	25734878	25734879	bulges	-	chr21:25734879-25734901:-	FALSE	5'- GCGGAGGTGGTGGCGGCGGAGGCTTTGGCAGC -3' rG4seq-K ----------------------*---------	ATP5PF|ENSG00000154723.13	ENST00000284971.8;ENST00000400087.7;ENST00000400090.7;ENST00000400093.3;ENST00000400094.5;ENST00000400099.5;ENST00000457143.6;ENST00000486002.1	5UTR	20	16	12	2		18	15	8	0
chr21	25880932	25880934	canonical/G3L1-7	-	chr21:25880932-25880950:-	FALSE	5'- GGGGCGGGTGGGGAGGGGTGCTCTGCTG -3' rG4seq-K ----------------**----------	APP|ENSG00000142192.21	ENST00000346798.8;ENST00000348990.9;ENST00000354192.7;ENST00000357903.7;ENST00000359726.7	3UTR	134	92	28	1		122	86	26	1
chr21	39183297	39183298	bulges	-	chr21:39183295-39183331:-	FALSE	5'- GAGGACGAAGAGGAGGAGGAGGAGGGGCGGAGGGAGACGCCCGAGG -3' rG4seq-K ---------------------------------*------------	PSMG1|ENSG00000183527.12	ENST00000331573.8;ENST00000380900.2;ENST00000431628.1	CDS	17	13	13	1		14	10	9	0
chr21	44769171	44769172	two-quartet	-	chr21:44769172-44769189:-	FALSE	5'- GGGAGAGGGAGGAGAGGCAGTCTCTTG -3' rG4seq-K -----------------*---------	UBE2G2|ENSG00000184787.19	ENST00000345496.7;ENST00000481546.1	3UTR	8	6	8	0		11	9	8	1
chr21	46190932	46190934	canonical/G3L1-7	-	chr21:46190933-46190952:-	FALSE	5'- GGGATGGGGACAGGGTGGGTGGCTTAGAC -3' rG4seq-K ------------------**---------	LSS|ENSG00000160285.15	ENST00000356396.8;ENST00000397728.8;ENST00000419093.5;ENST00000457828.6;ENST00000474319.1;ENST00000491729.1;ENST00000522411.5	3UTR	58	34	15	1		99	63	16	0
chr22	36301606	36301607	two-quartet	-	chr22:36301607-36301630:-	FALSE	5'- GGAGATGATGGCCAAGGAGGAGGAGCTGGTGAA -3' rG4seq-K -----------------------*---------	MYH9|ENSG00000100345.23	ENST00000216181.11;ENST00000495928.1;ENST00000685801.1;ENST00000691109.1	CDS	31	23	23	3		37	25	11	0
chr22	38485528	38485530	canonical/G3L1-7	-	chr22:38485528-38485545:-	FALSE	5'- GGGGAGGGAGGGAGGGGGAGGGCTGAA -3' rG4seq-K ---------------**----------	DDX17|ENSG00000100201.23	ENST00000396821.8;ENST00000403230.3	3UTR	96	79	61	3		127	110	52	6
chr22	38486435	38486436	bulges	-	chr22:38487872-38487909:-,chr22:38486436-38486440:-	TRUE	5'- GTGGACCACAGAGGAGGCGGCGGAGGCGGGGGTAAGGGTGGTCGTTCTCGT -3' rG4seq-K -----------------------------------------*---------	DDX17|ENSG00000100201.23	ENST00000216019.11;ENST00000396821.8;ENST00000403230.3;ENST00000431312.2	CDS	112	84	42	4		158	111	35	3
chr22	38700279	38700280	canonical/G3L1-7	-	chr22:38700279-38700303:-	FALSE	5'- GGGGGGTGGGAGGGAAGGGTGGGGAAACGGAAAC -3' rG4seq-K -----------------------*----------	JOSD1|ENSG00000100221.11	ENST00000216039.9;ENST00000412832.1;ENST00000417712.1;ENST00000427389.5;ENST00000456626.1;ENST00000462610.1;ENST00000490169.1;ENST00000683374.1	5UTR	56	46	18	7		84	71	15	5
chr22	42870022	42870024	canonical/G3L1-7	-	chr22:42870022-42870052:-	FALSE	5'- GGGCCGGCGGGGGTGGGGGGAACGTGGGGGAACCTGTGTT -3' rG4seq-K ----------------------------**----------	PACSIN2|ENSG00000100266.19	ENST00000263246.8;ENST00000337959.8;ENST00000407585.5;ENST00000507586.1	3UTR	73	44	22	1		80	46	31	1
chr3	10305126	10305127	bulges	-	chr3:10305125-10305156:-	FALSE	5'- GGAGGAGGAGGACGGCCAGTGGAAGGAGGAGCAGAAGCTAG -3' rG4seq-K -----------------------------*-----------	SEC13|ENSG00000157020.18	ENST00000337354.8;ENST00000350697.8;ENST00000383801.6;ENST00000397109.7;ENST00000397117.5;ENST00000476597.1;ENST00000477547.6;ENST00000479868.6;ENST00000490283.1	CDS	45	37	13	1		43	37	9	0
chr3	15052271	15052272	two-quartet	-	chr3:15052272-15052290:-	FALSE	5'- GGATGTGGGAGAGGAGGGTCTGAAGCTG -3' rG4seq-K ------------------*---------	MRPS25|ENSG00000131368.8	ENST00000253686.7;ENST00000420267.5;ENST00000444840.6;ENST00000449354.6	3UTR	26	24	8	1		28	27	6	0
chr3	49720469	49720470	bulges	-	chr3:49720469-49720502:-	FALSE	5'- GGGAGGGTGCAAGGGCAGTCAGAAGGCTTGGGGCCTGGCTAAA -3' rG4seq-K --------------------------------*----------	GMPPB|ENSG00000173540.14	ENST00000308375.10;ENST00000308388.7;ENST00000480687.5;ENST00000677393.1;ENST00000678208.1;ENST00000678853.1	3UTR	23	9	11	0		22	12	10	0
chr3	49720992	49720994	longloop	-	chr3:49720993-49721022:-	FALSE	5'- GGGCTGCAGGGAGGAGAGTGAAGGGTGGGCTGGAGTTGG -3' rG4seq-K ----------------------------**---------	GMPPB|ENSG00000173540.14	ENST00000308375.10;ENST00000308388.7;ENST00000480687.5;ENST00000677393.1;ENST00000678010.1;ENST00000678208.1;ENST00000678853.1	3UTR	45	28	28	0		92	51	13	1
chr3	51938156	51938157	bulges	-	chr3:51938157-51938185:-	FALSE	5'- GAGGAGGAGGAGGAGGAGGAGCTGGAGGAAACTGCACA -3' rG4seq-K ----------------------------*---------	RRP9|ENSG00000114767.7	ENST00000232888.7	CDS	15	8	7	0		25	17	8	1
chr3	52254758	52254759	canonical/G3L1-7	-	chr3:52254758-52254779:-	FALSE	5'- GGGGATGGGTGGGGAGTGGGGCAGCGGCGTT -3' rG4seq-K --------------------*----------	WDR82|ENSG00000164091.12	ENST00000296490.8	3UTR	50	44	10	3		66	63	7	0
chr3	52451196	52451197	canonical/G3L1-7	-	chr3:52451196-52451218:-	FALSE	5'- GGGGTTGGGGAGGGGGTCGGGGTCCCAGGACC -3' rG4seq-K ---------------------*----------	TNNC1|ENSG00000114854.8	ENST00000232975.8	3UTR	23	12	11	0		23	15	7	0
chr3	53225730	53225732	longloop	-	chr3:53225729-53225756:-	FALSE	5'- GGGCGGGTATGAAGTGTGGGGCGGGGGTCTATACATT -3' rG4seq-K ------------------------**-----------	TKT|ENSG00000163931.17	ENST00000423516.5;ENST00000423525.6;ENST00000450814.6;ENST00000460343.5;ENST00000461139.5;ENST00000462138.6;ENST00000469678.1	3UTR	164	101	46	3		181	118	38	2
chr3	128620333	128620334	two-quartet	-	chr3:128620334-128620358:-	FALSE	5'- GGCAGATTGGGTGGTAGTGGGAGGTTGTGCATGG -3' rG4seq-K ------------------------*---------	RPN1|ENSG00000163902.12	ENST00000296255.8;ENST00000497289.5	3UTR	88	67	31	4		134	96	21	3
chr3	150543282	150543283	two-quartet	-	chr3:150543283-150543309:-	FALSE	5'- GGTAAGGGTGAGGGTCATAGGGCAGGTTTTGGGTTT -3' rG4seq-K --------------------------*---------	SERP1|ENSG00000120742.11	ENST00000239944.7;ENST00000479209.1	3UTR	33	26	13	3		50	31	24	4
chr3	150546147	150546148	two-quartet	-	chr3:150546148-150546168:-	FALSE	5'- GGGGTGGCCGGGGCAGGTGGTGGCGCCGCG -3' rG4seq-K --------------------*---------	SERP1|ENSG00000120742.11	ENST00000239944.7;ENST00000479209.1;ENST00000487153.1;ENST00000491660.1	5UTR	38	8	36	0		54	16	37	0
chr3	156543121	156543122	bulges	-	chr3:156543121-156543149:-	FALSE	5'- GGAAAAGTAGCAGGGTGGTCAGGGTGGGAGACACAAGA -3' rG4seq-K ---------------------------*----------	SSR3|ENSG00000114850.7	ENST00000265044.7;ENST00000463503.5;ENST00000464138.1;ENST00000467789.5;ENST00000476217.5;ENST00000478842.5;ENST00000498205.5	3UTR	49	31	30	2		59	42	34	1
chr3	184711345	184711346	two-quartet	-	chr3:184711346-184711366:-	FALSE	5'- GGAGGAGGAGGAGGAGGAGGATCTGGGAGG -3' rG4seq-K --------------------*---------	MAGEF1|ENSG00000177383.5	ENST00000317897.5	CDS	24	21	14	2		39	35	7	2
chr3	185919467	185919468	potential G-quadruplex & G>=40%	-	chr3:185919467-185919527:-	FALSE	5'- TGCGTGTTGTGTTGCCTTTCTGTCTTCACAGAGGAGGAGGTGGAGGAGGAGGAGGATGGAGAGCTGCCCA -3' rG4seq-K -----------------------------------------------------------*----------	TRA2B|ENSG00000136527.19	ENST00000259043.11;ENST00000382191.4;ENST00000414862.5;ENST00000453386.7;ENST00000456380.5;ENST00000463328.5;ENST00000466832.5;ENST00000487615.5;ENST00000492417.5	3UTR;CDS	296	106	66	4		349	120	48	3
chr3	185919471	185919472	bulges	-	chr3:185921103-185921104:-,chr3:185919472-185919496:-	TRUE	5'- GAGGAGGAGGTGGAGGAGGAGGAGGATGGAGAGCT -3' rG4seq-K -------------------------*---------	TRA2B|ENSG00000136527.19	ENST00000259043.11;ENST00000382191.4;ENST00000414862.5;ENST00000453386.7;ENST00000456380.5;ENST00000463328.5;ENST00000466832.5;ENST00000487615.5;ENST00000492417.5	3UTR;CDS	179	162	60	4		220	204	39	11
chr3	196050070	196050071	two-quartet	-	chr3:196050070-196050088:-	FALSE	5'- GGTTTGGGGGCTGTGGGGAAGGAGAGTC -3' rG4seq-K -----------------*----------	TFRC|ENSG00000072274.13	ENST00000360110.9;ENST00000392396.7;ENST00000420415.5;ENST00000426789.5	3UTR	14	7	13	0		16	9	12	0
chr3	197672408	197672409	two-quartet	-	chr3:197672409-197672428:-	FALSE	5'- GGGGGGAAGTGGGTAGAGGATGGGATGTT -3' rG4seq-K -------------------*---------	RUBCN|ENSG00000145016.16	ENST00000273582.9;ENST00000296343.10	3UTR	11	10	6	0		12	9	6	0
chr4	1212103	1212104	bulges	-	chr4:1212102-1212126:-	FALSE	5'- GGGCTGTCAGGAGGCGGGAGGGGGCAGCGCTGGG -3' rG4seq-K ----------------------*-----------	CTBP1|ENSG00000159692.16	ENST00000290921.10;ENST00000382952.8;ENST00000503594.5;ENST00000514596.1	3UTR	12	7	15	1		18	11	13	2
chr4	24584482	24584483	longloop	-	chr4:24584481-24584508:-	FALSE	5'- GGGCTGTAGTAGCGGGAGGGGTGGGGGTCCTCCAGAG -3' rG4seq-K -------------------------*-----------	DHX15|ENSG00000109606.13	ENST00000336812.5;ENST00000513092.1	5UTR	30	25	7	1		44	32	10	1
chr4	68337277	68337278	potential G-quadruplex & G>=40%	-	chr4:68337277-68337337:-	FALSE	5'- TGATGAGCAAGGGAACAACACTGAGAATGAGGAGGAAGGAGTGGAAGAAGATGTGGAGGAAGATGAAGAA -3' rG4seq-K -----------------------------------------------------------*----------	YTHDC1|ENSG00000083896.13	ENST00000344157.9;ENST00000355665.7;ENST00000579690.5	CDS	9	8	6	0		15	13	7	2
chr4	75644296	75644297	longloop	-	chr4:75644297-75644334:-	FALSE	5'- GGGAGGGAGGGAGTCCTGTGTGTTTGTGGGGAGAGGGAAGGAGGAAG -3' rG4seq-K -------------------------------------*---------	G3BP2|ENSG00000138757.15	ENST00000359707.9;ENST00000395719.7;ENST00000676470.1;ENST00000676584.1;ENST00000676666.1;ENST00000676839.1;ENST00000676974.1;ENST00000677003.1;ENST00000677060.1;ENST00000677171.1;ENST00000677192.1;ENST00000677201.1;ENST00000677265.1;ENST00000677333.1;ENST00000677583.1;ENST00000677606.1;ENST00000677620.1;ENST00000677727.1;ENST00000677794.1;ENST00000677876.1;ENST00000677889.1;ENST00000677952.1;ENS…	3UTR	27	21	10	1		29	16	9	1
chr4	77075475	77075476	bulges	-	chr4:77075474-77075502:-	FALSE	5'- GGAGGAGGAGGAGGAGGAAGAGGAGGAGAAGAATGTTT -3' rG4seq-K --------------------------*-----------	CCNI|ENSG00000118816.11	ENST00000237654.9;ENST00000507788.2;ENST00000511943.5;ENST00000515790.1	5UTR;CDS	73	62	32	4		85	74	14	0
chr4	82427200	82427201	bulges	-	chr4:82427202-82427235:-	FALSE	5'- GGTGCTGCAGCTGGTGGACGAGGTGGTACGAGGGGTCGTGGCC -3' rG4seq-K ----------------------------------*--------	HNRNPDL|ENSG00000152795.18	ENST00000295470.10;ENST00000349655.8;ENST00000502762.4;ENST00000507721.5;ENST00000514511.1;ENST00000602300.5;ENST00000614627.4;ENST00000621267.4;ENST00000630114.2;ENST00000630827.1	3UTR;CDS	17	11	23	1		22	13	12	1
chr5	43291072	43291073	canonical/G3L1-7	-	chr5:43291073-43291099:-	FALSE	5'- GGGTGGGCATGGGGTGGGGGTATGGGAACAGTTGGA -3' rG4seq-K --------------------------*---------	HMGCS1|ENSG00000112972.15	ENST00000325110.11;ENST00000433297.2	3UTR	290	62	84	5		360	75	67	4
chr5	43291079	43291081	canonical/G3L1-7	-	chr5:43291079-43291104:-	FALSE	5'- GGGTGGGGTGGGCATGGGGTGGGGGTATGGGAACA -3' rG4seq-K -----------------------**----------	HMGCS1|ENSG00000112972.15	ENST00000325110.11;ENST00000433297.2	3UTR	338	172	125	19		450	216	97	12
chr5	43291085	43291086	canonical/G3L1-7	-	chr5:43291086-43291104:-	FALSE	5'- GGGTGGGGTGGGCATGGGGTGGGGGTAT -3' rG4seq-K ------------------*---------	HMGCS1|ENSG00000112972.15	ENST00000325110.11;ENST00000433297.2	3UTR	22	15	38	3		28	15	29	3
chr5	74629174	74629176	canonical/G3L1-7	-	chr5:74629174-74629192:-	FALSE	5'- GGGTGGGTTGGGGAGGGGTGGATTTTTA -3' rG4seq-K ----------------**----------	ENC1|ENSG00000171617.15	ENST00000302351.9;ENST00000510316.5;ENST00000618628.4;ENST00000651128.1	3UTR	61	46	6	1		57	44	13	3
chr5	74629826	74629828	canonical/G3L1-7	-	chr5:74629827-74629848:-	FALSE	5'- GGGGCGAGGGAGGGGGGTGGGATTTTTGGTG -3' rG4seq-K --------------------**---------	ENC1|ENSG00000171617.15	ENST00000302351.9;ENST00000509284.1;ENST00000510316.5;ENST00000618628.4;ENST00000651128.1	3UTR	104	75	46	6		121	88	31	3
chr5	134225867	134225868	two-quartet	-	chr5:134225865-134225892:-	FALSE	5'- GGAGCGGCAGCCGGCTGGGGCGGGTGGCATCATGGAC -3' rG4seq-K ------------------------*------------	ENSG00000272772|ENSG00000272772.1;ENSG00000273345|ENSG00000273345.5;PPP2CA|ENSG00000113575.10	ENST00000231504.5;ENST00000481195.6;ENST00000518409.1;ENST00000519718.1;ENST00000520515.5	5UTR;non_coding	36	16	18	1		38	19	20	2
chr5	135399153	135399154	longloop	-	chr5:135399154-135399189:-	FALSE	5'- GGGCCGCGCGGGCGGGAAGCGAAGAGGCGGGCGGGCCAGCGAGGA -3' rG4seq-K -----------------------------------*---------	MACROH2A1|ENSG00000113648.17	ENST00000304332.8;ENST00000312469.8;ENST00000360597.8;ENST00000423969.6;ENST00000506218.1;ENST00000506532.5;ENST00000506671.5;ENST00000507868.5;ENST00000508120.5;ENST00000508785.5;ENST00000508962.1;ENST00000510038.1;ENST00000511689.6;ENST00000687629.1	5UTR	35	22	11	0		57	37	12	0
chr5	137752762	137752765	canonical/G3L1-7	-	chr5:137752761-137752783:-	FALSE	5'- GGGTGGGGGTTGGGGTGGGGGGTAGTTTACTT -3' rG4seq-K ------------------***-----------	HNRNPA0|ENSG00000177733.7	ENST00000314940.7	3UTR	218	124	52	23		281	164	85	15
chr5	137752812	137752814	bulges	-	chr5:137752813-137752834:-	FALSE	5'- GTTTTTTGGGGGGAGGGAGGGAGTGAACTTG -3' rG4seq-K --------------------**---------	HNRNPA0|ENSG00000177733.7	ENST00000314940.7	3UTR	113	82	33	6		156	121	42	5
chr5	137753232	137753233	bulges	-	chr5:137753233-137753258:-	FALSE	5'- GCGGCGGCGGCGGCGGCGGTGGAGGCAGTAGCTGG -3' rG4seq-K -------------------------*---------	HNRNPA0|ENSG00000177733.7	ENST00000314940.7	CDS	44	33	25	3		64	41	21	1
chr5	137754304	137754305	bulges	-	chr5:137754305-137754339:-	FALSE	5'- GGAGCGGAGGTGGCGGCGGCGGCGGTAGCGGTGGCCTTGGTTGT -3' rG4seq-K ----------------------------------*---------	HNRNPA0|ENSG00000177733.7	ENST00000314940.7	5UTR	93	32	34	1		170	50	17	1
chr5	137754313	137754314	bulges	-	chr5:137754314-137754339:-	FALSE	5'- GGAGCGGAGGTGGCGGCGGCGGCGGTAGCGGTGGC -3' rG4seq-K -------------------------*---------	HNRNPA0|ENSG00000177733.7	ENST00000314940.7	5UTR	45	17	28	1		87	39	12	1
chr5	137938639	137938640	bulges	-	chr5:137938640-137938659:-	FALSE	5'- GGGGGGTGGGGGGTGAGGGAAAACCTGGT -3' rG4seq-K -------------------*---------	FAM13B|ENSG00000031003.11	ENST00000033079.7;ENST00000689681.1	3UTR	28	23	8	0		30	25	7	1
chr5	149550996	149550997	potential G-quadruplex & G>=40%	-	chr5:149550996-149551056:-	FALSE	5'- CGTAGCCTTGCCTAGTGTAGGAGCCCCGAGGCCTCCGTCCTCTTCCCAGAGGTGTCGGGGCTTGGCCCCA -3' rG4seq-K -----------------------------------------------------------*----------	CSNK1A1|ENSG00000113712.19	ENST00000261798.10;ENST00000377843.8;ENST00000515748.2;ENST00000515768.6;ENST00000523203.5;ENST00000606719.6;ENST00000657001.1;ENST00000657462.1;ENST00000657706.1;ENST00000661952.1;ENST00000670598.1	5UTR	47	23	31	6		62	42	19	6
chr5	151101319	151101320	canonical/G3L1-7	-	chr5:151101320-151101351:-	FALSE	5'- GGGCAGGGGTGGGGGGAGGGGTTGGGTTGGGCTCTTATCTT -3' rG4seq-K -------------------------------*---------	ANXA6|ENSG00000197043.14	ENST00000354546.10;ENST00000377751.9;ENST00000521512.5;ENST00000522664.5;ENST00000523714.5	3UTR	36	17	10	1		34	15	9	0
chr5	177331743	177331745	bulges	-	chr5:177331743-177331768:-	FALSE	5'- GGGGTGGGCTCCTGAGGACGTGGGGAAGTGATTTT -3' rG4seq-K -----------------------**----------	LMAN2|ENSG00000169223.15	ENST00000303127.12	3UTR	29	11	24	0		19	8	16	0
chr5	179614846	179614848	potential G-quadruplex & G>=40%	-	chr5:179614846-179614906:-	FALSE	5'- ATGGGCGTGAACGGAATGGGAGGGTTGTCTAGCATGTCCAGTATGAGTGGTGGATGGGGAATGTAATTGA -3' rG4seq-K ----------------------------------------------------------**----------	HNRNPH1|ENSG00000169045.17	ENST00000329433.10;ENST00000356731.9;ENST00000393432.8;ENST00000442819.6;ENST00000502632.5;ENST00000502904.5;ENST00000510411.5;ENST00000510678.5;ENST00000514332.5;ENST00000515481.5;ENST00000519033.5;ENST00000521720.5;ENST00000523449.5;ENST00000524179.1	3UTR;CDS	73	27	70	6		94	30	59	3
chr5	179618049	179618051	bulges	-	chr5:179618144-179618173:-,chr5:179618050-179618060:-	TRUE	5'- GAGGATGAGGCGTGGTGCTTATGGTGGAGGCTATGGAGGCTATGATGAT -3' rG4seq-K --------------------------------------**---------	HNRNPH1|ENSG00000169045.17	ENST00000329433.10;ENST00000356731.9;ENST00000393432.8;ENST00000442819.6;ENST00000502632.5;ENST00000502904.5;ENST00000503105.5;ENST00000504549.5;ENST00000504779.6;ENST00000510411.5;ENST00000510678.5;ENST00000514332.5;ENST00000514731.5;ENST00000515481.5;ENST00000518548.5;ENST00000519958.5;ENST00000520415.1;ENST00000521173.5;ENST00000523921.1	3UTR;CDS	75	34	58	4		78	30	55	3
chr5	180791364	180791365	bulges	-	chr5:180791364-180791392:-	FALSE	5'- GTGGTGGGGGGCACTGGGCTTGTTGGGGCCAGAAATGT -3' rG4seq-K ---------------------------*----------	MGAT1|ENSG00000131446.17	ENST00000307826.5;ENST00000333055.8;ENST00000393340.7;ENST00000446023.6	3UTR	11	9	10	0		21	14	9	0
chr6	7910636	7910637	bulges	-	chr6:7910637-7910660:-	FALSE	5'- GGAGGCGGCGGCGGCGGCGGCGGACGGGCCCCC -3' rG4seq-K -----------------------*---------	BLOC1S5-TXNDC5|ENSG00000259040.5;TXNDC5|ENSG00000239264.9	ENST00000379757.9;ENST00000439343.2	CDS;non_coding	19	9	17	0		19	11	21	1
chr6	13622028	13622030	bulges	-	chr6:13622028-13622049:-	FALSE	5'- GGGGGAGGGGGGAGAGAGGGGAAGGAAATGG -3' rG4seq-K -------------------**----------	RANBP9|ENSG00000010017.13	ENST00000011619.6	3UTR	44	32	24	0		35	21	14	0
chr6	18263847	18263848	bulges	-	chr6:18263848-18263889:-	FALSE	5'- GGAGGAAGAGGACGAGGACGACGAGGAGGAGGAGGAGGAGGAAAAAGGAAA -3' rG4seq-K -----------------------------------------*---------	DEK|ENSG00000124795.17	ENST00000244776.11;ENST00000503715.5;ENST00000505224.5;ENST00000507591.2;ENST00000515742.2;ENST00000515770.2;ENST00000651624.1;ENST00000651992.1;ENST00000652576.1;ENST00000652689.1	CDS	28	18	16	1		26	12	9	0
chr6	28904477	28904478	bulges	-	chr6:28904476-28904506:-	FALSE	5'- GGAGACATTATTGGGAGGTAGAGGTGGGAGATAAAGCCAA -3' rG4seq-K ----------------------------*-----------	TRIM27|ENSG00000204713.11	ENST00000377194.7;ENST00000377199.4;ENST00000414543.5;ENST00000467742.1;ENST00000481474.5	CDS	10	8	7	1		24	15	7	1
chr6	30743269	30743271	bulges	-	chr6:30743270-30743288:-	FALSE	5'- GGGTTGGGGGTTGGTGGGCTGTCACGGA -3' rG4seq-K -----------------**---------	IER3|ENSG00000137331.12	ENST00000259874.6;ENST00000376377.2	3UTR	253	141	74	11		367	226	57	6
chr6	30743430	30743431	two-quartet	-	chr6:30743431-30743456:-	FALSE	5'- GGCTGGGATGAAGTCTGGTGGTGGGTCGTAAGTTT -3' rG4seq-K -------------------------*---------	IER3|ENSG00000137331.12	ENST00000259874.6;ENST00000376377.2	3UTR	65	45	45	10		79	47	44	9
chr6	30743467	30743469	bulges	-	chr6:30743467-30743500:-	FALSE	5'- GTAGGAGAAGAAATGGGGAGGACTCGGGTGGGGGAGGACGTCC -3' rG4seq-K -------------------------------**----------	IER3|ENSG00000137331.12	ENST00000259874.6;ENST00000376377.2	3UTR	85	41	65	1		99	48	63	3
chr6	31271701	31271703	longloop	-	chr6:31271701-31271737:-	FALSE	5'- GGGGAGCCGCGGGCGCCGTGGGTGGAGCAGGAGGGGCCGGAGTATT -3' rG4seq-K ----------------------------------**----------	HLA-C|ENSG00000204525.18	ENST00000376228.10;ENST00000376237.8;ENST00000383329.7;ENST00000415537.1;ENST00000484378.1;ENST00000487245.5;ENST00000495835.1	CDS	79	45	46	5		72	55	36	7
chr6	31534436	31534437	longloop	-	chr6:31534436-31534468:-	FALSE	5'- GGGTGGTTGTTAGGGTTTGGGGCTAGGTGGGGCCAATTGCAT -3' rG4seq-K -------------------------------*----------	ATP6V1G2-DDX39B|ENSG00000254870.5;DDX39B|ENSG00000198563.14	ENST00000376177.6;ENST00000376185.5;ENST00000396172.6;ENST00000417023.5;ENST00000427214.5;ENST00000431908.5;ENST00000458640.5;ENST00000462256.5;ENST00000481456.1;ENST00000482195.5;ENST00000484566.5	non_coding	43	30	14	4		51	39	13	2
chr6	31730641	31730643	longloop	-	chr6:31730642-31730677:-	FALSE	5'- GGGGGGCCTGGGTCAGATTTTTATTGTGGGGTGGGATGAGTAGGA -3' rG4seq-K ----------------------------------**---------	CLIC1|ENSG00000213719.8	ENST00000375779.6;ENST00000375780.6;ENST00000375784.7;ENST00000395892.5;ENST00000616760.1	3UTR	306	192	98	9		380	261	80	8
chr6	31730645	31730646	potential G-quadruplex & G>=40%	-	chr6:31730645-31730705:-	FALSE	5'- GGTGGAAGAGGGGATGAGGGAAAGAAATGGGGGGCCTGGGTCAGATTTTTATTGTGGGGTGGGATGAGTA -3' rG4seq-K -----------------------------------------------------------*----------	CLIC1|ENSG00000213719.8	ENST00000375779.6;ENST00000375780.6;ENST00000375784.7;ENST00000395892.5;ENST00000616760.1	3UTR	49	12	46	0		59	12	37	0
chr6	31730670	31730674	bulges	-	chr6:31730671-31730696:-	FALSE	5'- GGGGATGAGGGAAAGAAATGGGGGGCCTGGGTCAG -3' rG4seq-K ----------------------****---------	CLIC1|ENSG00000213719.8	ENST00000375779.6;ENST00000375780.6;ENST00000375784.7;ENST00000395892.5;ENST00000616760.1	3UTR	215	44	298	5		443	93	226	5
chr6	31730684	31730686	bulges	-	chr6:31730685-31730715:-	FALSE	5'- GGGATGGTGTGGTGGAAGAGGGGATGAGGGAAAGAAATGG -3' rG4seq-K -----------------------------**---------	CLIC1|ENSG00000213719.8	ENST00000375779.6;ENST00000375780.6;ENST00000375784.7;ENST00000395892.5;ENST00000616760.1	3UTR	45	12	148	10		99	28	105	3
chr6	31736459	31736460	bulges	-	chr6:31736460-31736490:-	FALSE	5'- GGTGTGGGGTGCGTTGGGCTGGTGGGGAGGCCTAGTTTGG -3' rG4seq-K ------------------------------*---------	CLIC1|ENSG00000213719.8	ENST00000375779.6;ENST00000375780.6;ENST00000375784.7;ENST00000395892.5;ENST00000616760.1	5UTR	230	58	60	4		334	93	52	3
chr6	31736463	31736465	canonical/G3L1-7	-	chr6:31736463-31736491:-	FALSE	5'- GGGTGTGGGGTGCGTTGGGCTGGTGGGGAGGCCTAGTT -3' rG4seq-K --------------------------**----------	CLIC1|ENSG00000213719.8	ENST00000375779.6;ENST00000375780.6;ENST00000375784.7;ENST00000395892.5;ENST00000616760.1	5UTR	207	120	97	3		284	168	90	2
chr6	38676693	38676694	two-quartet	-	chr6:38676694-38676714:-	FALSE	5'- GGGAAAGGGGAGGAGGAAGGAAATGATATG -3' rG4seq-K --------------------*---------	GLO1|ENSG00000124767.7	ENST00000373365.5;ENST00000470973.1	3UTR	13	9	15	2		21	16	8	0
chr6	53497969	53497970	two-quartet	-	chr6:53497970-53497991:-	FALSE	5'- GGCGGCAGGGGTGGGGGGTGGCAATCATTTT -3' rG4seq-K ---------------------*---------	GCLC|ENSG00000001084.13	ENST00000509541.5;ENST00000616923.5;ENST00000650454.1	3UTR	118	61	30	0		167	89	28	3
chr6	53497975	53497976	two-quartet	-	chr6:53497974-53497991:-	FALSE	5'- GGCGGCAGGGGTGGGGGGTGGCAATCA -3' rG4seq-K ---------------*-----------	GCLC|ENSG00000001084.13	ENST00000509541.5;ENST00000616923.5;ENST00000650454.1	3UTR	43	32	23	2		60	47	23	4
chr6	53544652	53544653	bulges	-	chr6:53544653-53544676:-	FALSE	5'- GGAGGAGGAGGAGGAGGAGGAGGGGGCGGCCAT -3' rG4seq-K -----------------------*---------	GCLC|ENSG00000001084.13	ENST00000504525.1;ENST00000505197.1;ENST00000514004.5;ENST00000616923.5;ENST00000650454.1	5UTR	34	16	15	1		43	28	20	3
chr6	107958013	107958015	bulges	-	chr6:107958011-107958041:-	FALSE	5'- GGTGAGAAGAGCGAGGCGGAGGAGGGGGTGCCATGGCCGG -3' rG4seq-K --------------------------**------------	SEC63|ENSG00000025796.14	ENST00000369002.9;ENST00000446496.1;ENST00000460009.1	5UTR	22	9	12	0		43	18	24	0
chr6	108260951	108260953	bulges	-	chr6:108260950-108260991:-	FALSE	5'- GCGGCGGCGGCGGCGGCTGAACGCGGAGGGGGCGGAGGGAGCCCGCGGCGG -3' rG4seq-K --------------------------------------**-----------	SNX3|ENSG00000112335.15	ENST00000230085.13;ENST00000349379.5;ENST00000368979.6;ENST00000426155.6	5UTR	45	13	28	0		48	23	20	0
chr6	130839557	130839558	bulges	-	chr6:130839556-130839583:-	FALSE	5'- GGAGAGGGGGAGGGGGCTGTGGTGGTGTTCTGTTGGT -3' rG4seq-K -------------------------*-----------	EPB41L2|ENSG00000079819.19	ENST00000337057.8;ENST00000368128.6;ENST00000392427.7;ENST00000445890.6;ENST00000452150.6;ENST00000527411.5;ENST00000528282.5;ENST00000530481.5;ENST00000530757.5;ENST00000531410.5;ENST00000628542.2	3UTR	51	31	19	2		82	47	14	1
chr6	158818182	158818183	longloop	-	chr6:158818183-158818205:-	FALSE	5'- GGGCGGGCGGGCGCTCTAAGGGTTCTGCTCTG -3' rG4seq-K ----------------------*---------	EZR|ENSG00000092820.19	ENST00000337147.11;ENST00000367075.4;ENST00000476189.1	5UTR	309	136	58	0		411	164	51	3
chr6	158818193	158818195	bulges	-	chr6:158818192-158818227:-	FALSE	5'- GGCGCGGCAGGAGGACGAGGCAGGGCGGGCGGGCGCTCTAAGGGT -3' rG4seq-K --------------------------------**-----------	EZR|ENSG00000092820.19	ENST00000337147.11;ENST00000367075.4;ENST00000476189.1	5UTR	180	140	98	6		251	204	80	7
chr7	1544542	1544543	longloop	-	chr7:1544543-1544574:-	FALSE	5'- GGGGGAGCGTGGGCGCATGTGAGCGGGAGGGACGGAGACTA -3' rG4seq-K -------------------------------*---------	TMEM184A|ENSG00000164855.16	ENST00000297477.10;ENST00000319018.12;ENST00000421996.1;ENST00000449955.1	3UTR	15	9	6	0		21	17	8	1
chr7	6462360	6462361	potential G-quadruplex & G>=40%	-	chr7:6462360-6462420:-	FALSE	5'- CTGAAGAATCCAGTGGCAGGGGTTCTGGCTGCTTTCCATCTGAGTGTGGGATGGGAGGGGTGTTCATGAT -3' rG4seq-K -----------------------------------------------------------*----------	DAGLB|ENSG00000164535.15;KDELR2|ENSG00000136240.10	ENST00000258739.9;ENST00000436575.5;ENST00000454368.2;ENST00000463747.1	3UTR;non_coding	19	12	12	0		35	26	10	0
chr7	26192526	26192527	bulges	-	chr7:26192525-26192556:-	FALSE	5'- GTGGAGGAAGTGGGGGTTATGGTGGGAGGAGCCGATACTGA -3' rG4seq-K -----------------------------*-----------	HNRNPA2B1|ENSG00000122566.22	ENST00000354667.8;ENST00000356674.8;ENST00000360787.8;ENST00000463181.5;ENST00000476233.2;ENST00000490912.6;ENST00000608362.2;ENST00000618183.5;ENST00000676497.1;ENST00000676524.1;ENST00000676746.1;ENST00000676749.1;ENST00000676903.1;ENST00000676932.1;ENST00000677037.1;ENST00000677075.1;ENST00000677321.1;ENST00000677339.1;ENST00000677396.1;ENST00000677571.1;ENST00000677574.1;ENST00000677631.1;ENS…	3UTR;CDS	168	38	80	3		234	55	87	2
chr7	26192529	26192531	bulges	-	chr7:26192531-26192563:-	FALSE	5'- GGAGGCAGTGGAGGAAGTGGGGGTTATGGTGGGAGGAGCCGA -3' rG4seq-K --------------------------------**--------	HNRNPA2B1|ENSG00000122566.22	ENST00000354667.8;ENST00000356674.8;ENST00000360787.8;ENST00000463181.5;ENST00000476233.2;ENST00000490912.6;ENST00000608362.2;ENST00000618183.5;ENST00000676497.1;ENST00000676524.1;ENST00000676746.1;ENST00000676749.1;ENST00000676903.1;ENST00000676932.1;ENST00000677037.1;ENST00000677075.1;ENST00000677321.1;ENST00000677339.1;ENST00000677396.1;ENST00000677571.1;ENST00000677574.1;ENST00000677631.1;ENS…	3UTR;CDS	196	81	147	14		273	119	164	16
chr7	26193593	26193594	two-quartet	-	chr7:26193594-26193615:-	FALSE	5'- GGGTGGGGGCTACGGAGGTGGTTATGACAAC -3' rG4seq-K ---------------------*---------	HNRNPA2B1|ENSG00000122566.22	ENST00000354667.8;ENST00000356674.8;ENST00000360787.8;ENST00000463181.5;ENST00000476233.2;ENST00000490912.6;ENST00000608362.2;ENST00000618183.5;ENST00000676497.1;ENST00000676524.1;ENST00000676746.1;ENST00000676749.1;ENST00000676903.1;ENST00000676932.1;ENST00000677037.1;ENST00000677075.1;ENST00000677321.1;ENST00000677339.1;ENST00000677396.1;ENST00000677571.1;ENST00000677574.1;ENST00000677631.1;ENS…	3UTR;CDS	107	39	66	6		177	60	50	4
chr7	26193632	26193633	bulges	-	chr7:26193633-26193665:-	FALSE	5'- GGAGGAGGAAGAGGAGGATATGGTGGTGGAGGACCTGGATAT -3' rG4seq-K --------------------------------*---------	HNRNPA2B1|ENSG00000122566.22	ENST00000354667.8;ENST00000356674.8;ENST00000360787.8;ENST00000463181.5;ENST00000476233.2;ENST00000490912.6;ENST00000608362.2;ENST00000618183.5;ENST00000676497.1;ENST00000676524.1;ENST00000676746.1;ENST00000676749.1;ENST00000676903.1;ENST00000676932.1;ENST00000677037.1;ENST00000677075.1;ENST00000677321.1;ENST00000677339.1;ENST00000677396.1;ENST00000677571.1;ENST00000677574.1;ENST00000677631.1;ENS…	3UTR;CDS	112	42	80	13		166	71	41	3
chr7	26193635	26193636	bulges	-	chr7:26193633-26193665:-	FALSE	5'- GGAGGAGGAAGAGGAGGATATGGTGGTGGAGGACCTGGATAT -3' rG4seq-K -----------------------------*------------	HNRNPA2B1|ENSG00000122566.22	ENST00000354667.8;ENST00000356674.8;ENST00000360787.8;ENST00000463181.5;ENST00000476233.2;ENST00000490912.6;ENST00000608362.2;ENST00000618183.5;ENST00000676497.1;ENST00000676524.1;ENST00000676746.1;ENST00000676749.1;ENST00000676903.1;ENST00000676932.1;ENST00000677037.1;ENST00000677075.1;ENST00000677321.1;ENST00000677339.1;ENST00000677396.1;ENST00000677571.1;ENST00000677574.1;ENST00000677631.1;ENS…	3UTR;CDS	71	41	70	5		92	59	40	0
chr7	44848007	44848008	bulges	-	chr7:44848006-44848040:-	FALSE	5'- GGCGGCGGCGGCGCGGGTCGGCAGCGGGAGGGCGCGCGGCCGAG -3' rG4seq-K --------------------------------*-----------	H2AZ2|ENSG00000105968.19	ENST00000222690.10;ENST00000308153.9;ENST00000349299.7;ENST00000350771.7;ENST00000381124.9;ENST00000437072.5;ENST00000446531.1;ENST00000521529.5	5UTR	63	54	9	3		69	61	10	0
chr7	73442135	73442136	canonical/G3L1-7	-	chr7:73442136-73442161:-	FALSE	5'- GGGACAGCTAGGGAGGGTGGGAGGGAGGCGAGCGA -3' rG4seq-K -------------------------*---------	BAZ1B|ENSG00000009954.11	ENST00000339594.9;ENST00000404251.1	3UTR	26	24	9	0		56	47	8	2
chr7	73447292	73447293	bulges	-	chr7:73447293-73447324:-	FALSE	5'- GAGGAGGAGGAGGAAGAAGAGGAGGAGGAGGAAGAAGATTA -3' rG4seq-K -------------------------------*---------	BAZ1B|ENSG00000009954.11	ENST00000339594.9;ENST00000404251.1	CDS	27	22	7	1		41	35	7	1
chr7	76327653	76327656	canonical/G3L1-7	-	chr7:76327654-76327686:-	FALSE	5'- GGGGGAGGGGGGGGGGGGCAGGGTAGGTGGGGCTTTCCCTAA -3' rG4seq-K ------------------------------***---------	YWHAG|ENSG00000170027.7	ENST00000307630.5	3UTR	255	95	63	6		320	109	48	3
chr7	76327663	76327664	canonical/G3L1-7	-	chr7:76327663-76327689:-	FALSE	5'- GGGGGGGGAGGGGGGGGGGGGCAGGGTAGGTGGGGC -3' rG4seq-K -------------------------*----------	YWHAG|ENSG00000170027.7	ENST00000307630.5	3UTR	16	10	14	1		23	14	10	0
chr7	76329478	76329480	canonical/G3L1-7	-	chr7:76329479-76329509:-	FALSE	5'- GGGGGTCGGGTGGGGGAGGGAAAGGGAGGGATGACCTTCC -3' rG4seq-K -----------------------------**---------	YWHAG|ENSG00000170027.7	ENST00000307630.5	3UTR	232	79	50	3		224	79	29	3
chr7	76329482	76329483	bulges	-	chr7:76329484-76329509:-	FALSE	5'- GGGGGTCGGGTGGGGGAGGGAAAGGGAGGGATGAC -3' rG4seq-K --------------------------*--------	YWHAG|ENSG00000170027.7	ENST00000307630.5	3UTR	59	38	20	0		59	39	11	0
chr7	76329488	76329489	canonical/G3L1-7	-	chr7:76329489-76329509:-	FALSE	5'- GGGGGTCGGGTGGGGGAGGGAAAGGGAGGG -3' rG4seq-K --------------------*---------	YWHAG|ENSG00000170027.7	ENST00000307630.5	3UTR	18	12	20	1		19	16	9	0
chr7	97852187	97852189	bulges	-	chr7:97852188-97852217:-	FALSE	5'- GTTGGATGGGGACTGTGGGTAGATAGGGGAACAATGAGA -3' rG4seq-K ----------------------------**---------	ASNS|ENSG00000070669.17;ENSG00000284707|ENSG00000284707.2	ENST00000175506.8;ENST00000394308.8;ENST00000394309.7;ENST00000422745.5;ENST00000437628.5;ENST00000444334.5;ENST00000454046.5;ENST00000455086.5;ENST00000641315.1;ENST00000641390.1;ENST00000641784.1	3UTR;non_coding	68	40	31	4		87	57	36	3
chr7	149021080	149021081	potential G-quadruplex & G>=40%	-	chr7:149021080-149021140:-	FALSE	5'- TAACAGAGAAAATGCCATTGAGGATGAAGAGGAGGAGGAGGAGGAAGATGATGATGAGGAAGAAGACGAC -3' rG4seq-K -----------------------------------------------------------*----------	PDIA4|ENSG00000155660.11	ENST00000286091.9;ENST00000413966.1;ENST00000652332.1	CDS	61	29	88	7		59	25	66	5
chr8	143724686	143724687	bulges	-	chr8:143724686-143724707:-	FALSE	5'- GGGGCCAGGTGAGGGCAGGGGACAAGGTGCA -3' rG4seq-K --------------------*----------	FAM83H|ENSG00000180921.7	ENST00000388913.4;ENST00000395103.2;ENST00000650760.1	3UTR	19	18	7	1		25	23	9	0
chr8	143925699	143925700	bulges	-	chr8:143925700-143925735:-	FALSE	5'- GGAGGAGGTGGTGCGGCGGGAGGAGGCGGCGGTGGACGCGCAGCA -3' rG4seq-K -----------------------------------*---------	PLEC|ENSG00000178209.17	ENST00000322810.8;ENST00000345136.8;ENST00000354589.7;ENST00000354958.6;ENST00000356346.7;ENST00000357649.6;ENST00000398774.6;ENST00000436759.6;ENST00000527096.5;ENST00000527303.2;ENST00000528025.6;ENST00000685198.1;ENST00000687971.1;ENST00000693060.1	CDS	131	42	21	2		179	60	22	0
chr8	143925705	143925706	bulges	-	chr8:143925704-143925735:-	FALSE	5'- GGAGGAGGTGGTGCGGCGGGAGGAGGCGGCGGTGGACGCGC -3' rG4seq-K -----------------------------*-----------	PLEC|ENSG00000178209.17	ENST00000322810.8;ENST00000345136.8;ENST00000354589.7;ENST00000354958.6;ENST00000356346.7;ENST00000357649.6;ENST00000398774.6;ENST00000436759.6;ENST00000527096.5;ENST00000527303.2;ENST00000528025.6;ENST00000685198.1;ENST00000687971.1;ENST00000693060.1	CDS	50	20	15	0		64	34	20	1
chr8	143925708	143925709	bulges	-	chr8:143925707-143925735:-	FALSE	5'- GGAGGAGGTGGTGCGGCGGGAGGAGGCGGCGGTGGACG -3' rG4seq-K --------------------------*-----------	PLEC|ENSG00000178209.17	ENST00000322810.8;ENST00000345136.8;ENST00000354589.7;ENST00000354958.6;ENST00000356346.7;ENST00000357649.6;ENST00000398774.6;ENST00000436759.6;ENST00000527096.5;ENST00000527303.2;ENST00000528025.6;ENST00000685198.1;ENST00000687971.1;ENST00000693060.1	CDS	29	15	14	0		31	21	18	0
chr8	143929243	143929246	bulges	-	chr8:143929244-143929273:-	FALSE	5'- GGCAGAGGTGGAGGGGCTGGGCAAGGGGGTCGCCCGGCT -3' rG4seq-K ---------------------------*-*---------	PLEC|ENSG00000178209.17	ENST00000322810.8;ENST00000345136.8;ENST00000354589.7;ENST00000354958.6;ENST00000356346.7;ENST00000357649.6;ENST00000398774.6;ENST00000436759.6;ENST00000527096.5;ENST00000527303.2;ENST00000528025.6;ENST00000685198.1;ENST00000687971.1;ENST00000693060.1	CDS	83	28	42	3		85	33	42	3
chr8	143933292	143933293	bulges	-	chr8:143933293-143933314:-	FALSE	5'- GGGCGGGGGAGGTGGAACGGGACTTGGACAA -3' rG4seq-K ---------------------*---------	PLEC|ENSG00000178209.17	ENST00000322810.8;ENST00000345136.8;ENST00000354589.7;ENST00000354958.6;ENST00000356346.7;ENST00000357649.6;ENST00000398774.6;ENST00000436759.6;ENST00000527096.5;ENST00000527303.2;ENST00000528025.6;ENST00000685198.1;ENST00000687971.1;ENST00000693060.1	CDS	76	37	25	1		64	34	16	0
chr8	143933298	143933299	two-quartet	-	chr8:143933299-143933314:-	FALSE	5'- GGGCGGGGGAGGTGGAACGGGACTT -3' rG4seq-K ---------------*---------	PLEC|ENSG00000178209.17	ENST00000322810.8;ENST00000345136.8;ENST00000354589.7;ENST00000354958.6;ENST00000356346.7;ENST00000357649.6;ENST00000398774.6;ENST00000436759.6;ENST00000527096.5;ENST00000527303.2;ENST00000528025.6;ENST00000685198.1;ENST00000687971.1;ENST00000693060.1	CDS	25	10	25	2		25	11	14	0
chr9	33441442	33441446	canonical/G3L1-7	-	chr9:33441443-33441475:-	FALSE	5'- GGGTGGATGTGGGTAGGGCTGGGAGGAGGGGGCCACAGCTTA -3' rG4seq-K -----------------------------****---------	AQP3|ENSG00000165272.16	ENST00000297991.6;ENST00000493581.1	3UTR	135	42	67	2		129	62	24	0
chr9	35057028	35057029	longloop	-	chr9:35057029-35057066:-	FALSE	5'- GGGGGTGGGGGCGCTTGCCCAGGAGAGGGACCAGGGGTGCGCCCACA -3' rG4seq-K -------------------------------------*---------	VCP|ENSG00000165280.18	ENST00000358901.11;ENST00000417448.2;ENST00000448530.6;ENST00000479300.2;ENST00000493886.5;ENST00000676836.2;ENST00000677257.1;ENST00000678018.1;ENST00000678465.1;ENST00000678650.1;ENST00000679204.2;ENST00000679599.1;ENST00000679647.1;ENST00000679800.1;ENST00000679862.1;ENST00000679902.1;ENST00000680916.1;ENST00000681335.1;ENST00000681537.1;ENST00000681690.1	3UTR;CDS	31	14	30	0		34	11	22	0
chr9	125236385	125236386	bulges	-	chr9:125236386-125236411:-	FALSE	5'- GGGTGGGGGGGAGAAGAAGAATTGGCCATCTTAAA -3' rG4seq-K -------------------------*---------	HSPA5|ENSG00000044574.9	ENST00000324460.7;ENST00000679355.1;ENST00000679475.1;ENST00000680257.1;ENST00000680272.1;ENST00000680494.1;ENST00000680640.1;ENST00000681045.1;ENST00000681424.1;ENST00000681544.1;ENST00000681675.1;ENST00000681774.1	3UTR	99	46	112	2		101	52	91	6
chr9	125239255	125239256	potential G-quadruplex & G>=40%	-	chr9:125239255-125239315:-	FALSE	5'- GCTTATGGCCTGGATAAGAGGGAGGGGGAGAAGAACATCCTGGTGTTTGACCTGGGTGGCGGAACCTTCG -3' rG4seq-K -----------------------------------------------------------*----------	HSPA5|ENSG00000044574.9	ENST00000324460.7;ENST00000679355.1;ENST00000679475.1;ENST00000680032.1;ENST00000680234.1;ENST00000680257.1;ENST00000680272.1;ENST00000680494.1;ENST00000680640.1;ENST00000681045.1;ENST00000681424.1;ENST00000681540.1;ENST00000681544.1;ENST00000681675.1;ENST00000681774.1	CDS	73	18	107	4		78	26	69	3
chr9	127506237	127506239	longloop	-	chr9:127506239-127506270:-	FALSE	5'- GGGGGTGCCTCATGGGGTGGGCAGGCCTGGGGTGAAATGAG -3' rG4seq-K -------------------------------**--------	NIBAN2|ENSG00000136830.12	ENST00000373312.4;ENST00000373314.7;ENST00000478917.1	3UTR	56	34	20	1		98	55	19	3
chr9	127506295	127506296	bulges	-	chr9:127506296-127506334:-	FALSE	5'- GGGGAAGGAGGGGGTCTTCAGGCTGGAGCCAGGCTGGGGGTGCTGGGT -3' rG4seq-K --------------------------------------*---------	NIBAN2|ENSG00000136830.12	ENST00000373312.4;ENST00000373314.7;ENST00000478917.1	3UTR	10	8	10	1		11	8	10	1
chr9	128258518	128258519	bulges	-	chr9:128258517-128258554:-	FALSE	5'- GGAGGAGGAGGAGGATGAGGAGGAGGAGGAGGAGGAGGCGGTGGCAG -3' rG4seq-K -----------------------------------*-----------	GOLGA2|ENSG00000167110.19	ENST00000421699.8;ENST00000462089.2;ENST00000610329.5;ENST00000611957.5;ENST00000639983.2;ENST00000685377.1;ENST00000686291.1;ENST00000687179.1;ENST00000692923.1;ENST00000693185.1;ENST00000693736.1	3UTR;CDS	14	6	12	0		20	8	9	0
chr9	132262971	132262973	canonical/G3L1-7	-	chr9:132262972-132262991:-	FALSE	5'- GGGACAAGGGAGGGGTGGGCTGCCTGATT -3' rG4seq-K ------------------**---------	SETX|ENSG00000107290.14	ENST00000224140.6;ENST00000436441.5;ENST00000477049.1	3UTR	46	34	14	0		48	34	12	1
chr9	133097852	133097854	bulges	-	chr9:133097851-133097883:-	FALSE	5'- GAGGAAGGAGGATTTGGGGTGGGGGTGGGGTGATTGAATATT -3' rG4seq-K -----------------------------**-----------	RALGDS|ENSG00000160271.16	ENST00000372047.7;ENST00000372050.8;ENST00000393157.8;ENST00000393160.7;ENST00000469972.5;ENST00000482648.5;ENST00000493438.5	3UTR	29	16	14	2		34	21	12	0
chr9	133361622	133361624	bulges	-	chr9:133361623-133361643:-	FALSE	5'- GGGAGGGGAGGATAAGTGGGATCTACCAAT -3' rG4seq-K -------------------**---------	SURF4|ENSG00000148248.14	ENST00000371989.8;ENST00000545297.5;ENST00000613129.4;ENST00000618229.4	3UTR	136	99	45	1		160	124	17	2
chr9	137043276	137043277	canonical/G3L1-7	-	chr9:137043277-137043296:-	FALSE	5'- GGGGAGGGGTGGGGCAGGGTAGTTCTGAT -3' rG4seq-K -------------------*---------	NPDC1|ENSG00000107281.10	ENST00000371600.7;ENST00000371601.5;ENST00000485589.1;ENST00000488145.1	CDS	23	19	7	1		41	28	6	1
chr9	137448286	137448288	canonical/G3L1-7	-	chr9:137448285-137448304:-	FALSE	5'- GGGAGGGCTGGGGCGGGGGCCGGGCTTGG -3' rG4seq-K ----------------**-----------	NSMF|ENSG00000165802.23	ENST00000265663.12;ENST00000371472.6;ENST00000371473.7;ENST00000371474.7;ENST00000371475.9;ENST00000371482.5;ENST00000437259.5	3UTR	45	23	22	0		48	24	18	0
chrM	14326	14327	two-quartet	-	chrM:14327-14343:-	FALSE	5'- GGGGTGGTGGTTGTGGTAAACTTTAA -3' rG4seq-K ----------------*---------	MT-ND6|ENSG00000198695.2	ENST00000361681.2	CDS	46	14	38	1		51	20	21	1
chrM	14487	14490	potential G-quadruplex & G>=40%	-	chrM:14487-14547:-	FALSE	5'- ATTCTGAATTTTGGGGGAGGTTATATGGGTTTAATAGTTTTTTTAATTTATTTAGGGGGAATGATGGTTG -3' rG4seq-K ---------------------------------------------------------*-*----------	MT-ND6|ENSG00000198695.2	ENST00000361681.2	CDS	54	11	95	3		64	11	54	2
chrX	154348595	154348598	canonical/G3L1-7	-	chrX:154348595-154348616:-	FALSE	5'- GGGAGGGGTGAGGGATGGGGGTCCTGTACAC -3' rG4seq-K ------------------***----------	FLNA|ENSG00000196924.19	ENST00000360319.9;ENST00000369850.10;ENST00000369856.8;ENST00000420627.5;ENST00000422373.6;ENST00000498411.1;ENST00000610817.5;ENST00000673639.2;ENST00000676696.1;ENST00000678304.1	3UTR	334	185	114	4		415	237	81	6
chrX	154349420	154349421	two-quartet	-	chrX:154349419-154349441:-	FALSE	5'- GGTGGTGGCCAAGGGCCTGGGGCTGAGCAAGG -3' rG4seq-K --------------------*-----------	FLNA|ENSG00000196924.19	ENST00000360319.9;ENST00000369850.10;ENST00000369856.8;ENST00000420627.5;ENST00000422373.6;ENST00000462590.1;ENST00000490936.5;ENST00000498411.1;ENST00000498491.5;ENST00000610817.5;ENST00000673639.2;ENST00000676696.1;ENST00000678304.1	3UTR;CDS	32	17	29	5		45	27	19	5
chrX	154353338	154353339	potential G-quadruplex & G>=40%	-	chrX:154353338-154353398:-	FALSE	5'- AACATCTCAGAGACGGATCTCAGCCTGCTGACGGCCACTGTGGTCCCGCCCTCGGGCCGGGAGGAGCCCT -3' rG4seq-K -----------------------------------------------------------*----------	FLNA|ENSG00000196924.19	ENST00000360319.9;ENST00000369850.10;ENST00000369856.8;ENST00000415241.1;ENST00000420627.5;ENST00000422373.6;ENST00000438732.2;ENST00000466325.1;ENST00000490936.5;ENST00000610817.5;ENST00000673639.2;ENST00000676696.1;ENST00000678304.1	3UTR;CDS	23	10	31	2		23	7	30	0
