# Supplementary material
Source: HighWire-hosted journal article supplement (doi:10.1101/rna.080321.124)
Supplement: Supplemental_Table_S3.xlsx [file Supplemental_Table_S3.xlsx]

## Sheet: DMSO_DP-K-rep1.bootstrap_00.cov
In vivo DMSO											Biological rep1					Biological rep2
chromosome	start	end	rG4_structural_class	strand	rG4_intervals	splicing	sequence_diagram	gene_names	coding_regions	transcript_ids	BR1_K+ coverage	BR1_K+ stop	BR1_Li+ coverage	BR1_Li+ stop		BR2_K+ coverage	BR2_K+ stop	BR2_Li+ coverage	BR2_Li+ stop
chr10	72275604	72275605	bulges	+	chr10:72275581-72275604:+	FALSE	5'- GGAGGGAGGGGGGAGGTCGGAGGTCGTGGAGGT -3' rG4seq-K -----------------------*---------	DDIT4|ENSG00000168209.6	ENST00000307365.4;ENST00000471240.2;ENST00000473155.2;ENST00000491934.3;ENST00000681898.1	3UTR	8	2	38	1		17	3	47	1
chr11	65505485	65505487	canonical/G3L1-7	+	chr11:65505462-65505486:+	FALSE	5'- GGGGAGGGAAAGGGGGAAAGCGGGCAACCACTTT -3' rG4seq-K -----------------------**---------	MALAT1|ENSG00000251562.9	ENST00000534336.1;ENST00000610851.1;ENST00000616691.1;ENST00000617489.1;ENST00000618227.1;ENST00000619449.2	non_coding	148	8	433	10		150	8	420	9
chr19	12943878	12943879	bulges	+	chr19:12943841-12943878:+	FALSE	5'- GAGGAGGATGAGGAGGACAAGGAGGAAGATGAGGAGGAAGATGTCCC -3' rG4seq-K -------------------------------------*---------	CALR|ENSG00000179218.15	ENST00000316448.10;ENST00000586760.2;ENST00000586803.1;ENST00000586967.2;ENST00000588454.6;ENST00000680816.1	3UTR;CDS	44	7	155	7		60	5	124	3
chr7	44212716	44212718	longloop	+	chr7:44212679-44212717:+	FALSE	5'- GGGGGGTGGGGAGTCCCTGATGCTAGGGCTGGGGTGGGTGGAGTTTGA -3' rG4seq-K -------------------------------------**---------	YKT6|ENSG00000106636.9	ENST00000223369.3;ENST00000421621.3;ENST00000478411.2;ENST00000496112.5;ENST00000677436.1;ENST00000677851.1;ENST00000678359.1;ENST00000678497.1;ENST00000679020.1;ENST00000679209.1;ENST00000679310.1	3UTR	6	2	27	1		7	2	20	1
chr7	73832105	73832108	bulges	+	chr7:73832087-73832109:+	FALSE	5'- GGTGTGGTGGTGGAGTGGGGAGCTGGCTTCTG -3' rG4seq-K ------------------***-----------	CLDN4|ENSG00000189143.10	ENST00000340958.4;ENST00000431918.1;ENST00000435050.1	3UTR	151	18	330	19		194	24	410	23
chr7	73832398	73832401	bulges	+	chr7:73832380-73832401:+	FALSE	5'- GGGCAGTGGTGGGGGAGGGGGCCAGAGAGGC -3' rG4seq-K ------------------***----------	CLDN4|ENSG00000189143.10	ENST00000340958.4;ENST00000431918.1;ENST00000435050.1	3UTR	110	8	385	9		144	9	426	12
chrM	901	902	potential G-triplex & G>=40%	+	chrM:842-902:+	FALSE	5'- GAAAGTTTAACTAAGCTATACTAACCCCAGGGTTGGTCAATTTCGTGCCAGCCACCGCGGTCACACGATT -3' rG4seq-K -----------------------------------------------------------*----------	MT-RNR1|ENSG00000211459.2	ENST00000389680.2	non_coding	55	15	226	38		44	14	132	28
chr16	87830642	87830643	two-quartet	-	chr16:87830643-87830656:-	FALSE	5'- GGTTGGTGGGGGGTCCAGTCTGT -3' rG4seq-K -------------*---------	SLC7A5|ENSG00000103257.9	ENST00000261622.5;ENST00000565644.5	3UTR	10	4	20	0		7	3	31	0
chr19	3976289	3976291	canonical/G3L1-7	-	chr19:3976290-3976312:-	FALSE	5'- GGGGAGGGGGAGGCGGGATGGGACACCCAACA -3' rG4seq-K ---------------------**---------	EEF2|ENSG00000167658.16	ENST00000309311.7;ENST00000600794.1	3UTR;CDS	83	6	261	7		111	10	318	6
chr19	3976294	3976296	canonical/G3L1-7	-	chr19:3976295-3976321:-	FALSE	5'- GGGCCGGTCGGGGAGGGGGAGGCGGGATGGGACACC -3' rG4seq-K -------------------------**---------	EEF2|ENSG00000167658.16	ENST00000309311.7;ENST00000600794.1	3UTR;CDS	80	10	260	10		106	10	337	12
chr2	231455431	231455432	bulges	-	chr2:231455432-231455467:-	FALSE	5'- GGAGGACGAGGTGGTGGTAGAGGAGGCCGAGGAGGATTTGGTGGC -3' rG4seq-K -----------------------------------*---------	NCL|ENSG00000115053.17	ENST00000322723.9;ENST00000356936.6;ENST00000417652.6;ENST00000436894.2;ENST00000453992.6;ENST00000454824.6;ENST00000461347.5;ENST00000676514.1;ENST00000676690.1;ENST00000676798.1;ENST00000676913.1;ENST00000677703.1;ENST00000677786.1;ENST00000678131.1;ENST00000678246.1;ENST00000678364.1;ENST00000678405.1;ENST00000678729.1;ENST00000678828.1;ENST00000678849.1;ENST00000679348.1	3UTR;CDS	14	3	56	2		27	6	55	5
chr20	17613810	17613812	canonical/G3L1-7	-	chr20:17613811-17613835:-	FALSE	5'- GGGGCGGGGCGGGAAGCGGGTGGGACCGGGCAGC -3' rG4seq-K -----------------------**---------	RRBP1|ENSG00000125844.17	ENST00000246043.8;ENST00000360807.8;ENST00000377807.6;ENST00000377813.6;ENST00000468428.1;ENST00000470422.5	3UTR	16	2	66	0		20	2	76	1
chr6	30743269	30743271	bulges	-	chr6:30743270-30743288:-	FALSE	5'- GGGTTGGGGGTTGGTGGGCTGTCACGGA -3' rG4seq-K -----------------**---------	IER3|ENSG00000137331.12	ENST00000259874.6;ENST00000376377.2	3UTR	32	7	96	6		59	7	128	4
chr8	143929243	143929246	bulges	-	chr8:143929244-143929273:-	FALSE	5'- GGCAGAGGTGGAGGGGCTGGGCAAGGGGGTCGCCCGGCT -3' rG4seq-K ---------------------------*-*---------	PLEC|ENSG00000178209.17	ENST00000322810.8;ENST00000345136.8;ENST00000354589.7;ENST00000354958.6;ENST00000356346.7;ENST00000357649.6;ENST00000398774.6;ENST00000436759.6;ENST00000527096.5;ENST00000527303.2;ENST00000528025.6;ENST00000685198.1;ENST00000687971.1;ENST00000693060.1	CDS	7	3	64	1		30	4	71	3
