# Supplementary material
Source: HighWire-hosted journal article supplement (doi:10.1101/rna.080321.124)
Supplement: Supplemental_Table_S4.xlsx [file Supplemental_Table_S4.xlsx]

## Sheet: phendc3_DN-result.csv.new
In vitro rG4 phenDC3											Biological rep1					Biological rep2
chromosome	start	end	rG4_structural_class	strand	rG4_intervals	splicing	sequence_diagram	gene_names	coding_regions	transcript_ids	BR1_K+ coverage	BR1_K+stop	BR1_Li+coverage	BR1_Li+stop		DNrep2_K_cov	DNrep2_K_stop	DNrep2_Li_cov	DNrep2_Li_stop
chr1	28509188	28509189	potential G-quadruplex & G>=40%	+	chr1:28509129-28509189:+	FALSE	5'- TTTTGCAGAAAGTCTGCTGTTTTTGTACTAAAGGCTTTGGAATTTGGCATTTAGCTAGGAATGCACATTC -3' rG4seq-K -----------------------------------------------------------*----------	RCC1|ENSG00000180198.17;SNHG3|ENSG00000242125.3	ENST00000373833.10;ENST00000398958.6;ENST00000413987.1;ENST00000427469.5;ENST00000434290.6;ENST00000437681.1;ENST00000649185.1;ENST00000683442.1	non_coding	153	131	14	1		104	84	15	4
chr1	37809127	37809128	two-quartet	+	chr1:37809113-37809127:+	FALSE	5'- GGGCCGGTGGCTGGACTCTGAACA -3' rG4seq-K --------------*---------	C1orf122|ENSG00000197982.14	ENST00000373042.5;ENST00000373043.1;ENST00000468084.1	3UTR	109	99	13	6		44	38	7	1
chr1	46316719	46316720	two-quartet	+	chr1:46316701-46316719:+	FALSE	5'- GGGTTTGGCTTAGGCTGGTAGCTTCTAT -3' rG4seq-K ------------------*---------	UQCRH|ENSG00000173660.12	ENST00000311672.10;ENST00000460947.1;ENST00000489056.5;ENST00000496387.5	3UTR	89	83	11	1		51	48	7	0
chr1	85583618	85583619	bulges	+	chr1:85583591-85583618:+	FALSE	5'- GGGGAGGGAGGGGAAATGTAATACTGGAATAATTTGT -3' rG4seq-K ---------------------------*---------	CCN1|ENSG00000142871.18	ENST00000451137.7;ENST00000674743.1;ENST00000674818.1;ENST00000675083.1;ENST00000676007.1	3UTR	103	43	34	4		53	25	25	1
chr1	151248134	151248135	potential G-quadruplex & G>=40%	+	chr1:151248075-151248135:+	FALSE	5'- AGTTGAGGACCGCAGCATCCCCTCCACTCCAGAGTTGGGTGGTATGGATTTTCAACTGGCCAACCCTTTG -3' rG4seq-K -----------------------------------------------------------*----------	PIP5K1A|ENSG00000143398.20	ENST00000349792.9;ENST00000368888.9;ENST00000368890.8;ENST00000409426.5;ENST00000441902.6;ENST00000489625.1	3UTR	104	33	44	1		47	24	21	1
chr1	151248210	151248211	two-quartet	+	chr1:151248187-151248210:+	FALSE	5'- GGAAATGGGATTGCTGGACTTGGCAGCTTTCTT -3' rG4seq-K -----------------------*---------	PIP5K1A|ENSG00000143398.20	ENST00000349792.9;ENST00000368888.9;ENST00000368890.8;ENST00000409426.5;ENST00000489625.1	3UTR	93	73	11	1		46	36	8	0
chr1	151248361	151248362	two-quartet	+	chr1:151248343-151248362:+	FALSE	5'- GGTTTTTGGGGGATAAGGGTGTTTAACCA -3' rG4seq-K ------------------*----------	PIP5K1A|ENSG00000143398.20	ENST00000349792.9;ENST00000368888.9;ENST00000368890.8;ENST00000409426.5;ENST00000489625.1	3UTR	129	120	12	1		64	56	8	1
chr1	201970165	201970166	potential G-triplex & G>=40%	+	chr1:201970106-201970166:+	FALSE	5'- AATGTTTATAGTTTACTTTGAAAGTAAAATATACTATGTCTTGGTTTTGAGGATATTGGATACAAAACTC -3' rG4seq-K -----------------------------------------------------------*----------	TIMM17A|ENSG00000134375.11	ENST00000367287.5;ENST00000482943.1	3UTR	118	101	35	1		65	58	20	2
chr1	228099088	228099089	potential G-quadruplex & G>=40%	+	chr1:228099029-228099089:+	FALSE	5'- GCTGGAGCTGTTAAATTTATCTTGGGGAAACCTCAGAACTGGTCTATTTGGTGTCGTGGAACCTCTTACT -3' rG4seq-K -----------------------------------------------------------*----------	ARF1|ENSG00000143761.16	ENST00000272102.10;ENST00000540651.5;ENST00000541182.1	3UTR	227	178	39	1		128	94	19	3
chr10	100360739	100360740	two-quartet	+	chr10:100356744-100356764:+,chr10:100360733-100360740:+	TRUE	5'- GGTTTCACTTGGAGCTGTGGGTGAGGGCTTCCACAAC -3' rG4seq-K --------------------------*----------	SCD|ENSG00000099194.6	ENST00000370355.3	CDS	178	128	14	2		92	64	10	2
chr10	100364598	100364599	potential G-quadruplex & G>=40%	+	chr10:100364539-100364599:+	FALSE	5'- CTGTCATTAGTCTATATGGTTCTCCAAGAAACTGAATGAATCCATTGGAGAAGCGGTGGATAACTAGCCA -3' rG4seq-K -----------------------------------------------------------*----------	SCD|ENSG00000099194.6	ENST00000370355.3	3UTR	46	38	7	1		30	25	8	1
chr11	8685819	8685820	potential G-quadruplex & G>=40%	+	chr11:8685760-8685820:+	FALSE	5'- GGAGAAGATTAAGAGTGTTGGGGGGGCCTGTGTCCTGGTGGCTTGAAGCCACATGGAGGGAGTTTCATTA -3' rG4seq-K -----------------------------------------------------------*----------	RPL27A|ENSG00000166441.13	ENST00000314138.11;ENST00000524496.5;ENST00000525981.1;ENST00000526562.5;ENST00000530022.5;ENST00000530913.1;ENST00000532359.5;ENST00000534599.5	3UTR;CDS	181	139	30	8		93	72	21	2
chr11	57672877	57672878	potential G-quadruplex & G>=40%	+	chr11:57672818-57672878:+	FALSE	5'- TTGTGTTTCTTAATCTTCCCTTCTGCCTTGTTCTGGGGAGGTGGTTATTCATCATTTGGAATCACCTTTC -3' rG4seq-K -----------------------------------------------------------*----------	ZDHHC5|ENSG00000156599.11	ENST00000287169.8;ENST00000527985.5;ENST00000528177.5	5UTR	80	53	17	2		59	40	12	1
chr11	63759483	63759484	two-quartet	+	chr11:63759462-63759483:+	FALSE	5'- GGAATTTGGATGGGTAAAAGGTACCCTTGCC -3' rG4seq-K ---------------------*---------	RTN3|ENSG00000133318.14	ENST00000339997.8;ENST00000341307.6;ENST00000356000.7;ENST00000377819.10;ENST00000537981.5	3UTR	86	48	25	1		42	31	19	2
chr11	65500802	65500803	potential G-quadruplex & G>=40%	+	chr11:65500743-65500803:+	FALSE	5'- ACAGGGAAAGCGAGTGGTTGGTAAAAATCCGTGAGGTCGGCAATATGTTGTTTTTCTGGAACTTACTTAT -3' rG4seq-K -----------------------------------------------------------*----------	MALAT1|ENSG00000251562.9	ENST00000534336.1;ENST00000544868.2;ENST00000619449.2	non_coding	991	365	376	32		508	186	268	25
chr11	65501244	65501247	two-quartet	+	chr11:65501235-65501246:+	FALSE	5'- GGGGGTGGGGGCAAAATATGT -3' rG4seq-K ---------***---------	MALAT1|ENSG00000251562.9	ENST00000534336.1;ENST00000619449.2	non_coding	1650	1159	292	122		883	588	228	103
chr11	65501559	65501560	bulges	+	chr11:65501527-65501561:+	FALSE	5'- GGATGGTCTTAACAGGGAAGAGAGAGGGTGGGGGAGAAAATGTT -3' rG4seq-K --------------------------------*-----------	MALAT1|ENSG00000251562.9	ENST00000534336.1;ENST00000619449.2	non_coding	191	172	17	7		127	118	15	7
chr11	65502266	65502267	potential G-quadruplex & G>=40%	+	chr11:65502207-65502267:+	FALSE	5'- GCTGACATTAACTACAATTATGGGAAATGCAAAAGTTGTTTGGATATGGTAGTGTGTGGTTCTCTTTTGG -3' rG4seq-K -----------------------------------------------------------*----------	MALAT1|ENSG00000251562.9	ENST00000508832.2;ENST00000534336.1;ENST00000616527.4;ENST00000619449.2	non_coding	399	265	87	27		209	157	45	9
chr11	65502290	65502291	potential G-quadruplex & G>=40%	+	chr11:65502231-65502291:+	FALSE	5'- AAATGCAAAAGTTGTTTGGATATGGTAGTGTGTGGTTCTCTTTTGGAATTTTTTTCAGGTGATTTAATAA -3' rG4seq-K -----------------------------------------------------------*----------	MALAT1|ENSG00000251562.9	ENST00000508832.2;ENST00000534336.1;ENST00000616527.4;ENST00000619449.2	non_coding	651	205	184	13		398	121	114	7
chr11	65502613	65502615	longloop	+	chr11:65502587-65502615:+	FALSE	5'- GGGTGGGCTTTTGTTGATGAGGGAGGGGAAACTTTTTT -3' rG4seq-K --------------------------**----------	MALAT1|ENSG00000251562.9	ENST00000508832.2;ENST00000534336.1;ENST00000616527.4;ENST00000619449.2	non_coding	1146	1123	135	42		645	625	84	24
chr11	65503403	65503404	potential G-quadruplex & G>=40%	+	chr11:65503344-65503404:+	FALSE	5'- AAATTGTAGGACTTGTTCCTGTGGGCTTCAGTGATGGGATAGTACACTTCACTCAGAGGCATTTGCATCT -3' rG4seq-K -----------------------------------------------------------*----------	MALAT1|ENSG00000251562.9	ENST00000508832.2;ENST00000534336.1;ENST00000616527.4;ENST00000618925.1;ENST00000619449.2	non_coding	388	174	182	17		207	103	126	16
chr11	65503706	65503709	potential G-triplex & G>=40%	+	chr11:65503649-65503709:+	FALSE	5'- CCTTATTTAAATAAAATAGTGTTTGTCTGTAGTTCAGTGTTGGGGCAATCTTGGGGGGGATTCTTCTCTA -3' rG4seq-K ---------------------------------------------------------***----------	MALAT1|ENSG00000251562.9	ENST00000534336.1;ENST00000612781.1;ENST00000616527.4;ENST00000618925.1;ENST00000619449.2;ENST00000620465.4	non_coding	1326	799	218	61		702	403	119	47
chr11	65503804	65503805	potential G-quadruplex & G>=40%	+	chr11:65503745-65503805:+	FALSE	5'- ACTCTTTAATGGACCAGATCAGGATTTGAGCGGAAGAACGAATGTAACTTTAAGGCAGGAAAGACAAATT -3' rG4seq-K -----------------------------------------------------------*----------	MALAT1|ENSG00000251562.9	ENST00000534336.1;ENST00000612781.1;ENST00000616527.4;ENST00000618925.1;ENST00000619449.2;ENST00000620465.4	non_coding	130	74	50	5		86	47	47	6
chr11	65503932	65503933	potential G-quadruplex & G>=40%	+	chr11:65503873-65503933:+	FALSE	5'- TCTAAATAAGGAATAAATAACCTCTTAGACAGGTGGGAGATTATGATCAGAGTAAAAGGTAATTACACAT -3' rG4seq-K -----------------------------------------------------------*----------	MALAT1|ENSG00000251562.9	ENST00000534336.1;ENST00000612781.1;ENST00000616527.4;ENST00000619449.2;ENST00000620465.4	non_coding	194	86	113	11		119	43	78	7
chr11	65504291	65504293	canonical/G3L1-7	+	chr11:65504271-65504293:+	FALSE	5'- GGGATGGGAGGAGGGGGTGGGGCTTACTTGTT -3' rG4seq-K --------------------**----------	MALAT1|ENSG00000251562.9	ENST00000534336.1;ENST00000612781.1;ENST00000616527.4;ENST00000618132.1;ENST00000619449.2;ENST00000620465.4	non_coding	1262	950	107	45		655	492	72	27
chr11	65504630	65504633	two-quartet	+	chr11:65504619-65504633:+	FALSE	5'- GGTGGTGGGAGGGGACTGAAGCCT -3' rG4seq-K -----------***----------	MALAT1|ENSG00000251562.9	ENST00000534336.1;ENST00000610851.1;ENST00000612781.1;ENST00000613376.1;ENST00000618132.1;ENST00000619449.2	non_coding	559	318	72	14		266	138	36	5
chr11	65505020	65505021	potential G-quadruplex & G>=40%	+	chr11:65504961-65505021:+	FALSE	5'- TCAGACTATAGAAGGAGCTTCCAGTTGAATTCACCAGTGGACAAAATGAGGAAAACAGGTGAACAAGCTT -3' rG4seq-K -----------------------------------------------------------*----------	MALAT1|ENSG00000251562.9	ENST00000534336.1;ENST00000610851.1;ENST00000618227.1;ENST00000619449.2	non_coding	132	69	67	10		79	39	52	6
chr11	65505157	65505158	bulges	+	chr11:65505131-65505160:+	FALSE	5'- GGCGTGGGGGTGGAGGGGTGAGGTGGGCGCTAAGCCTTT -3' rG4seq-K --------------------------*------------	MALAT1|ENSG00000251562.9	ENST00000534336.1;ENST00000610851.1;ENST00000618227.1;ENST00000619449.2	non_coding	205	71	45	3		89	32	27	1
chr11	65505485	65505487	canonical/G3L1-7	+	chr11:65505462-65505486:+	FALSE	5'- GGGGAGGGAAAGGGGGAAAGCGGGCAACCACTTT -3' rG4seq-K -----------------------**---------	MALAT1|ENSG00000251562.9	ENST00000534336.1;ENST00000610851.1;ENST00000616691.1;ENST00000617489.1;ENST00000618227.1;ENST00000619449.2	non_coding	419	155	128	23		191	69	96	12
chr11	65505918	65505920	bulges	+	chr11:65505894-65505919:+	FALSE	5'- GTGGCTGAGAGGGCTTTTGGGTGGGAATGCAAAAA -3' rG4seq-K ------------------------**---------	MALAT1|ENSG00000251562.9	ENST00000534336.1;ENST00000610851.1;ENST00000616691.1;ENST00000617489.1;ENST00000618227.1;ENST00000619449.2	non_coding	333	201	82	22		161	101	42	13
chr11	65505990	65505991	potential G-triplex & G>=40%	+	chr11:65505931-65505991:+	FALSE	5'- CTCTGCTAAGACTTTTTCAGGTGAACATAACAGACTTGGCCAAGCTAGCATCTTAGCGGAAGCTGATCTC -3' rG4seq-K -----------------------------------------------------------*----------	MALAT1|ENSG00000251562.9	ENST00000534336.1;ENST00000610851.1;ENST00000616691.1;ENST00000617489.1;ENST00000618227.1;ENST00000619449.2	non_coding	116	59	44	3		48	24	41	2
chr11	118602103	118602104	potential G-quadruplex & G>=40%	+	chr11:118602044-118602104:+	FALSE	5'- GAAGGCTGTGGGTTCAGGGAGTCTTTGCCAATCCTGTTGGCCCTAAACTATCAAGGAGGCTCCATTTCAC -3' rG4seq-K -----------------------------------------------------------*----------	ARCN1|ENSG00000095139.15	ENST00000264028.5;ENST00000359415.8;ENST00000534182.2	3UTR	58	34	23	0		29	16	30	2
chr11	118602140	118602141	potential G-quadruplex & G>=40%	+	chr11:118602081-118602141:+	FALSE	5'- TGGCCCTAAACTATCAAGGAGGCTCCATTTCACCATTTGATTTTTTGCATTTCAGGAGGCAACTGATTGT -3' rG4seq-K -----------------------------------------------------------*----------	ARCN1|ENSG00000095139.15	ENST00000264028.5;ENST00000359415.8;ENST00000534182.2	3UTR	75	65	13	3		32	27	20	1
chr12	1780556	1780557	potential G-quadruplex & G>=40%	+	chr12:1780497-1780557:+	FALSE	5'- AATATCTCCTTTGTGGCCCCTCTGCAAGAGAAGGTGGTCTTTGGATTATTTTTCTTAGGAGCCATTCTCT -3' rG4seq-K -----------------------------------------------------------*----------	ADIPOR2|ENSG00000006831.10	ENST00000357103.5;ENST00000535774.1;ENST00000537190.1	CDS	85	43	22	0		39	22	15	0
chr12	6538321	6538325	potential G-triplex & G>=40%	+	chr12:6538265-6538325:+	FALSE	5'- GAATCTCCCCTCCTCACAGTTGCCATGTAGACCCCTTGAAGAGGGGAGGGGCCTAGGGAGCCGCACCTTG -3' rG4seq-K --------------------------------------------------------****----------	GAPDH|ENSG00000111640.15	ENST00000229239.10;ENST00000396856.5;ENST00000396858.5;ENST00000396859.5;ENST00000396861.5;ENST00000466525.1;ENST00000466588.5;ENST00000474249.5;ENST00000619601.1	3UTR	228	47	101	7		131	35	78	1
chr12	49272938	49272939	two-quartet	+	chr12:49272913-49272938:+	FALSE	5'- GGTGCCCCACTGGCTTCAAGGTTGGCATTAATTAC -3' rG4seq-K -------------------------*---------	TUBA1C|ENSG00000167553.17	ENST00000301072.11;ENST00000541364.5;ENST00000548470.1;ENST00000552448.1	3UTR;CDS	65	43	18	2		28	18	11	0
chr12	54350634	54350636	potential G-triplex & G>=40%	+	chr12:54350576-54350636:+	FALSE	5'- GTGAATTTTCATCTAGTTCCCCAATCGATGCTCTCAGGGTCATCTCGGGGATCACAGGGATCCTTAAATC -3' rG4seq-K ----------------------------------------------------------**----------	COPZ1|ENSG00000111481.10	ENST00000262061.7;ENST00000455864.6;ENST00000548281.5;ENST00000548753.1;ENST00000549043.5;ENST00000549116.5;ENST00000550171.5;ENST00000551779.5;ENST00000551962.5;ENST00000552218.5;ENST00000552362.5	3UTR	100	60	20	0		54	35	20	3
chr12	103947698	103947699	potential G-triplex & G>=40%	+	chr12:103947639-103947699:+	FALSE	5'- CAGCTGAAAAAGATGAATTGTAAATTATACTCTCACCATTTGGATCCTGTGTGGAGAGGGAATGTGAAAT -3' rG4seq-K -----------------------------------------------------------*----------	HSP90B1|ENSG00000166598.16	ENST00000299767.10;ENST00000548462.5;ENST00000550595.2;ENST00000552051.2;ENST00000614327.2;ENST00000679538.1;ENST00000679779.1;ENST00000679861.1;ENST00000680281.1;ENST00000680316.1;ENST00000680370.1;ENST00000680391.1;ENST00000680478.1;ENST00000680653.1;ENST00000680663.1;ENST00000680899.1;ENST00000680989.1;ENST00000681172.1;ENST00000681174.1;ENST00000681245.1;ENST00000681698.1;ENST00000681704.1;EN…	3UTR;CDS	263	205	61	5		124	99	35	4
chr12	103947728	103947729	potential G-quadruplex & G>=40%	+	chr12:103947669-103947729:+	FALSE	5'- TCTCACCATTTGGATCCTGTGTGGAGAGGGAATGTGAAATTTACATCATTTCTTTTTGGGAGAGACTTGT -3' rG4seq-K -----------------------------------------------------------*----------	HSP90B1|ENSG00000166598.16	ENST00000299767.10;ENST00000548462.5;ENST00000550595.2;ENST00000552051.2;ENST00000614327.2;ENST00000679538.1;ENST00000679779.1;ENST00000679861.1;ENST00000680281.1;ENST00000680316.1;ENST00000680370.1;ENST00000680391.1;ENST00000680478.1;ENST00000680653.1;ENST00000680663.1;ENST00000680899.1;ENST00000680989.1;ENST00000681172.1;ENST00000681174.1;ENST00000681245.1;ENST00000681698.1;ENST00000681704.1;EN…	3UTR	124	56	91	7		66	29	51	2
chr12	103947811	103947812	bulges	+	chr12:103947783-103947811:+	FALSE	5'- GGGATTATGGGTCACAGGAAAAAGTGGGTTTTTTAGTT -3' rG4seq-K ----------------------------*---------	HSP90B1|ENSG00000166598.16	ENST00000299767.10;ENST00000548462.5;ENST00000550595.2;ENST00000614327.2;ENST00000679538.1;ENST00000679779.1;ENST00000679861.1;ENST00000680281.1;ENST00000680316.1;ENST00000680370.1;ENST00000680391.1;ENST00000680478.1;ENST00000680653.1;ENST00000680663.1;ENST00000680899.1;ENST00000680989.1;ENST00000681172.1;ENST00000681174.1;ENST00000681245.1;ENST00000681698.1;ENST00000681704.1;ENST00000681910.1;EN…	3UTR	402	283	106	43		196	140	59	25
chr12	104349505	104349506	potential G-quadruplex & G>=40%	+	chr12:104349446-104349506:+	FALSE	5'- AGGAAGTTATTAATATCATAAGTTATTATTAATATTTTGAACACAGGTGGATGTGAAGGATTTTCATTTA -3' rG4seq-K -----------------------------------------------------------*----------	TXNRD1|ENSG00000198431.17	ENST00000503506.6;ENST00000525566.6;ENST00000526390.5;ENST00000526691.5;ENST00000527688.5	3UTR	239	223	21	2		122	117	10	0
chr12	104350138	104350139	potential G-triplex & G>=40%	+	chr12:104350079-104350139:+	FALSE	5'- TAATCATGTTGTGATTCTCTTTTCTTAGTGGAGTGGAATGTTCTATCCCCACAAGAAGGATTATATCTTA -3' rG4seq-K -----------------------------------------------------------*----------	TXNRD1|ENSG00000198431.17	ENST00000503506.6;ENST00000525566.6;ENST00000526390.5;ENST00000526691.5;ENST00000527688.5	3UTR	108	43	79	11		54	32	51	3
chr12	110346585	110346586	two-quartet	+	chr12:110346570-110346585:+	FALSE	5'- GGCTGGTGATGGAGGTTTCATACTC -3' rG4seq-K ---------------*---------	ATP2A2|ENSG00000174437.18	ENST00000308664.10;ENST00000313432.5;ENST00000377685.9;ENST00000539276.7;ENST00000548169.2;ENST00000553144.1	3UTR	409	387	26	12		205	188	14	4
chr12	120566933	120566935	potential G-triplex & G>=40%	+	chr12:120566875-120566935:+	FALSE	5'- ATTCTTATACCTGCTCCTCTGATTCTGCTTTGGGTCCCACCAGCACCGAGGGCCATGGGGCCCTCTCCAT -3' rG4seq-K ----------------------------------------------------------**----------	RNF10|ENSG00000022840.17	ENST00000325954.9;ENST00000366112.6;ENST00000413266.6;ENST00000535470.5;ENST00000538254.1;ENST00000540046.5;ENST00000545419.5;ENST00000546262.6	3UTR;CDS	164	89	37	1		78	41	16	0
chr12	120701381	120701382	potential G-quadruplex & G>=40%	+	chr12:120701322-120701382:+	FALSE	5'- GTGATCCAGGGAATGAAAAGAAATTTGACCCTGGATTGGTTCTCTCCTTGGACTTAAGGAATCTTACCTT -3' rG4seq-K -----------------------------------------------------------*----------	MLEC|ENSG00000110917.8	ENST00000228506.8	3UTR	164	127	18	0		85	68	14	0
chr12	123597456	123597457	potential G-triplex & G>=40%	+	chr12:123597397-123597457:+	FALSE	5'- TGCCTAACCCCCTAATTGTCTGTTAAAGCCAATTCTCTGGGTGTCCCAGTGAGTGGTGGCTTTTTTTCTT -3' rG4seq-K -----------------------------------------------------------*----------	TMED2|ENSG00000086598.11	ENST00000262225.8	3UTR	160	100	29	5		76	45	19	3
chr12	123597705	123597706	potential G-quadruplex & G>=40%	+	chr12:123597646-123597706:+	FALSE	5'- ACCATCAGTGTCAGCATTAGGGTTTTGGTTTTTGTTTCTTTTGGGTCTTTCTTTTTTGGCACATGTGAAT -3' rG4seq-K -----------------------------------------------------------*----------	TMED2|ENSG00000086598.11	ENST00000262225.8	3UTR	66	39	41	2		34	14	32	0
chr13	99563143	99563144	two-quartet	+	chr13:99563122-99563143:+	FALSE	5'- GGATTTTCTAGGCTCGGTAGGCAGAAAGAAT -3' rG4seq-K ---------------------*---------	TM9SF2|ENSG00000125304.10	ENST00000376387.5;ENST00000642475.1	3UTR	42	36	11	0		27	24	7	0
chr13	113534109	113534110	potential G-quadruplex & G>=40%	+	chr13:113534050-113534110:+	FALSE	5'- CGTGGAAGTTCTCCGAATCCTGGTTTTGATTGGTCAGATTCTTTTTTCACTAGCGGCGGTTTTTCTTTTA -3' rG4seq-K -----------------------------------------------------------*----------	TMCO3|ENSG00000150403.18	ENST00000375391.5;ENST00000434316.7;ENST00000465556.1;ENST00000474393.5	CDS	112	90	24	4		63	47	14	2
chr14	35029363	35029364	potential G-triplex & G>=40%	+	chr14:35029304-35029364:+	FALSE	5'- TCTTTTTCCTTCCTTCTTTCCTCCCTTTAATATAAGGGAGAAATACATGGTTTTTGTGGAAATCATTATA -3' rG4seq-K -----------------------------------------------------------*----------	SRP54|ENSG00000100883.13	ENST00000216774.11;ENST00000546080.6;ENST00000555557.5;ENST00000555746.6;ENST00000556994.5;ENST00000677621.1;ENST00000677647.1;ENST00000678274.1;ENST00000678477.1;ENST00000678519.1;ENST00000678627.1;ENST00000678836.1;ENST00000678963.1	3UTR	150	126	32	1		78	62	17	1
chr14	75281797	75281798	two-quartet	+	chr14:75281767-75281797:+	FALSE	5'- GGTTCATTATTGGAATTAACCTGGTGCTGGATATTTTCAA -3' rG4seq-K ------------------------------*---------	FOS|ENSG00000170345.10	ENST00000303562.9	3UTR	65	55	11	0		43	35	18	1
chr14	94111689	94111690	potential G-quadruplex & G>=40%	+	chr14:94111630-94111690:+	FALSE	5'- CTGAAGTTGAGGATCTCTTACTCTCTAGGCCACGGAATTAACCCGAGCAGGCATGGAGGCCTCTGCTCTC -3' rG4seq-K -----------------------------------------------------------*----------	IFI27|ENSG00000165949.13	ENST00000555081.5;ENST00000557700.1;ENST00000611954.4;ENST00000612813.4;ENST00000614204.4;ENST00000616764.5;ENST00000618200.4;ENST00000618863.1;ENST00000620396.4;ENST00000621160.5	5UTR;CDS	79	49	17	0		34	28	6	0
chr15	39596672	39596673	potential G-triplex & G>=40%	+	chr15:39596613-39596673:+	FALSE	5'- CAAGGAAAATCAGTCTAATAAGCTGCTCTGCCCCTTGTGCTCAGAGTGGATGTTATGGGATTCTTTTTTT -3' rG4seq-K -----------------------------------------------------------*----------	THBS1|ENSG00000137801.11	ENST00000260356.6	3UTR	294	176	99	16		138	81	64	12
chr15	44718104	44718105	two-quartet	+	chr15:44718082-44718104:+	FALSE	5'- GGCATGGTTGTGGTTAATCTGGTTTATTTTTG -3' rG4seq-K ----------------------*---------	B2M|ENSG00000166710.22	ENST00000559220.1;ENST00000561139.1;ENST00000561424.5;ENST00000623550.1;ENST00000648006.3	3UTR	128	91	28	6		70	55	13	2
chr16	2770995	2770996	two-quartet	+	chr16:2770976-2770996:+	FALSE	5'- GGCAGCCCTTGGATGGAGGGCTCCCTTTCC -3' rG4seq-K -------------------*----------	SRRM2|ENSG00000167978.17	ENST00000301740.13;ENST00000570539.1;ENST00000573692.1;ENST00000574331.5;ENST00000630499.2	3UTR;CDS	272	219	35	1		142	109	17	2
chr16	28837167	28837169	two-quartet	+	chr16:28837152-28837168:+	FALSE	5'- GGATGGCTGGACAAGGACTTTTACTT -3' rG4seq-K ---------------**---------	ATXN2L|ENSG00000168488.19	ENST00000325215.10;ENST00000336783.9;ENST00000340394.12;ENST00000382686.8;ENST00000395547.6;ENST00000562583.5;ENST00000563314.5;ENST00000564162.1;ENST00000565971.5;ENST00000566946.5;ENST00000567024.1;ENST00000570200.5	3UTR	92	34	34	2		57	29	31	2
chr16	56940141	56940142	potential G-quadruplex & G>=40%	+	chr16:56940082-56940142:+	FALSE	5'- CACAAGGTGGCCCTATTGTGGAAGAAGATGATGAAATAAATCGAGATTGGTTGGATTGGACCTATTCAGC -3' rG4seq-K -----------------------------------------------------------*----------	HERPUD1|ENSG00000051108.15	ENST00000300302.9;ENST00000344114.8;ENST00000379792.6;ENST00000439977.7;ENST00000563781.5;ENST00000563911.5;ENST00000564678.1;ENST00000567944.1;ENST00000568358.1;ENST00000568651.1;ENST00000570273.5	CDS	238	202	37	8		131	117	14	4
chr16	56943827	56943828	potential G-triplex & G>=40%	+	chr16:56943768-56943828:+	FALSE	5'- GTATAATTGCTTTTTAAAATGCAGTGCTTTACTTTAAACTAAGGGGAACTTTGCGGAGGTGAAAACCTTT -3' rG4seq-K -----------------------------------------------------------*----------	HERPUD1|ENSG00000051108.15	ENST00000300302.9;ENST00000344114.8;ENST00000379792.6;ENST00000439977.7;ENST00000564678.1	3UTR	114	87	26	2		43	34	33	5
chr16	56943843	56943844	potential G-quadruplex & G>=40%	+	chr16:56943784-56943844:+	FALSE	5'- AAATGCAGTGCTTTACTTTAAACTAAGGGGAACTTTGCGGAGGTGAAAACCTTTGCTGGGTTTTCTGTTC -3' rG4seq-K -----------------------------------------------------------*----------	HERPUD1|ENSG00000051108.15	ENST00000300302.9;ENST00000344114.8;ENST00000379792.6;ENST00000439977.7;ENST00000564678.1	3UTR	292	88	68	6		143	48	64	4
chr16	69703240	69703241	two-quartet	+	chr16:69703220-69703240:+	FALSE	5'- GGCTGGCCAGGTCAACATGGCACCTTAACT -3' rG4seq-K --------------------*---------	ENSG00000260772|ENSG00000260772.1;NFAT5|ENSG00000102908.22	ENST00000349945.7;ENST00000354436.6;ENST00000393742.7;ENST00000426654.6;ENST00000561622.1;ENST00000627621.3;ENST00000650987.1	3UTR;non_coding	81	57	6	0		46	36	11	0
chr17	8468094	8468095	potential G-quadruplex & G>=40%	+	chr17:8468035-8468095:+	FALSE	5'- GCATGTTAATGACTCTGATGGTGTCCTCCTCTGGGCAGCTGTATAGGATCATCATGTGGTTACAAAAAAT -3' rG4seq-K -----------------------------------------------------------*----------	NDEL1|ENSG00000166579.16	ENST00000334527.12;ENST00000380025.8;ENST00000578172.1;ENST00000581679.1;ENST00000583683.1	3UTR	143	117	18	4		75	62	13	3
chr17	16441633	16441634	two-quartet	+	chr17:16441617-16441633:+	FALSE	5'- GGCTGGAGTGTGGTGGCACAATCACA -3' rG4seq-K ----------------*---------	SNHG29|ENSG00000175061.19	ENST00000470491.7;ENST00000472367.5;ENST00000475947.7;ENST00000475953.6;ENST00000477249.7;ENST00000478103.6;ENST00000480811.6;ENST00000481027.5;ENST00000481898.6;ENST00000483140.7;ENST00000483588.2;ENST00000484836.2;ENST00000487066.6;ENST00000491009.6;ENST00000497774.6;ENST00000579473.6;ENST00000580180.6;ENST00000580770.5;ENST00000581361.5;ENST00000581718.6;ENST00000581913.5;ENST00000582911.6;ENS…	non_coding	150	105	13	3		80	52	7	0
chr17	16441936	16441937	potential G-quadruplex & G>=40%	+	chr17:16441877-16441937:+	FALSE	5'- TTTTAATGAATTGACTTTCATAAATTGGTTATGTTGGTGGGCAAAGTTCTTTAAGCTGGAAATTGTAAAT -3' rG4seq-K -----------------------------------------------------------*----------	SNHG29|ENSG00000175061.19	ENST00000470491.7;ENST00000472367.5;ENST00000475947.7;ENST00000475953.6;ENST00000477249.7;ENST00000478103.6;ENST00000480811.6;ENST00000481027.5;ENST00000481898.6;ENST00000483140.7;ENST00000483588.2;ENST00000484836.2;ENST00000487066.6;ENST00000491009.6;ENST00000497774.6;ENST00000579473.6;ENST00000580180.6;ENST00000580770.5;ENST00000581361.5;ENST00000581718.6;ENST00000582911.6;ENST00000583400.7;ENS…	non_coding	370	319	47	11		217	188	28	5
chr18	23482021	23482022	potential G-quadruplex & G>=40%	+	chr18:23481962-23482022:+	FALSE	5'- GTCAACTTTCAGCTTTTCTACATTTAGGTAAAATGGTTAGGATATAACTCATGGTGTGGCTAATCTACAT -3' rG4seq-K -----------------------------------------------------------*----------	RIOK3|ENSG00000101782.15	ENST00000339486.8;ENST00000577250.1;ENST00000581220.1;ENST00000581302.5	3UTR	75	61	18	1		44	38	12	1
chr19	2271497	2271498	potential G-quadruplex & G>=40%	+	chr19:2271438-2271498:+	FALSE	5'- CTCCTGATGCCCCTCACCCACCCCTGAAGATCCCAGGTGGGCGAGGGAATAGTCAGAGGGATCACAATCT -3' rG4seq-K -----------------------------------------------------------*----------	ENSG00000273734|ENSG00000273734.1;OAZ1|ENSG00000104904.12	ENST00000581150.6;ENST00000582888.8;ENST00000586054.2;ENST00000588673.3;ENST00000589361.2;ENST00000590943.6;ENST00000592727.3;ENST00000592787.2;ENST00000593012.1;ENST00000602676.6;ENST00000621615.1	CDS;non_coding	85	52	24	2		64	36	29	2
chr19	2273437	2273438	potential G-quadruplex & G>=40%	+	chr19:2273378-2273438:+	FALSE	5'- AGTTTCTTATTTGGAGTCTTTTGGAAACAGTCTTAGTCTTTTAACTTGGAAAGATGAGGTATTAATCCCC -3' rG4seq-K -----------------------------------------------------------*----------	ENSG00000273734|ENSG00000273734.1;OAZ1|ENSG00000104904.12	ENST00000586054.2;ENST00000590943.6;ENST00000602676.6;ENST00000621615.1	3UTR;non_coding	69	50	28	3		42	31	16	3
chr19	12944035	12944036	two-quartet	+	chr19:12944018-12944036:+	FALSE	5'- GGCTGGTTCGGATTTGGGGTGGATTTTG -3' rG4seq-K -----------------*----------	CALR|ENSG00000179218.15	ENST00000316448.10;ENST00000586760.2;ENST00000586967.2;ENST00000588454.6;ENST00000680816.1	3UTR	128	112	32	3		77	67	23	1
chr19	12944040	12944041	two-quartet	+	chr19:12944018-12944040:+	FALSE	5'- GGCTGGTTCGGATTTGGGGTGGATTTTGGTTT -3' rG4seq-K ----------------------*---------	CALR|ENSG00000179218.15	ENST00000316448.10;ENST00000586760.2;ENST00000586967.2;ENST00000588454.6;ENST00000680816.1	3UTR	582	375	95	43		328	210	46	18
chr19	38730500	38730501	potential G-quadruplex & G>=40%	+	chr19:38730441-38730501:+	FALSE	5'- AGTTTATTCTGATTGATTTTTTTTCTTGGTTTCTGGATAAACCACCCTCTGGGGACAGGATAATAAAACA -3' rG4seq-K -----------------------------------------------------------*----------	ACTN4|ENSG00000130402.13	ENST00000252699.7;ENST00000440400.2	3UTR	146	140	33	1		74	70	22	4
chr19	58550649	58550650	potential G-quadruplex & G>=40%	+	chr19:58550590-58550650:+	FALSE	5'- TCTCTGTCCTGTCACCCCATCCCCACTCCCCTGGTGGCCTGACTCCCACTCCCTGGTGGCCCCATCCCCC -3' rG4seq-K -----------------------------------------------------------*----------	TRIM28|ENSG00000130726.12	ENST00000253024.10;ENST00000341753.10;ENST00000597136.1;ENST00000598355.1	3UTR	146	125	14	2		90	80	16	0
chr2	27041528	27041529	two-quartet	+	chr2:27041509-27041528:+	FALSE	5'- GGGGGTCTTGGTCACAAGGCTCAGCTTCT -3' rG4seq-K -------------------*---------	TMEM214|ENSG00000119777.20	ENST00000238788.14;ENST00000321326.11;ENST00000404032.7;ENST00000435172.6;ENST00000460665.1	3UTR	101	82	15	2		56	47	11	0
chr2	74214515	74214516	potential G-quadruplex & G>=40%	+	chr2:74214456-74214516:+	FALSE	5'- GCCAGGAGCAGCCATTAACCTAGTGATTAATATGGGAGACATTACCATATGGAGGATGGATGCTTCACTT -3' rG4seq-K -----------------------------------------------------------*----------	MTHFD2|ENSG00000065911.13	ENST00000394053.7;ENST00000409601.1;ENST00000409804.5;ENST00000470592.5;ENST00000489041.2;ENST00000677170.1;ENST00000677299.1;ENST00000677377.1;ENST00000677558.1;ENST00000677997.1;ENST00000678228.1;ENST00000678340.1;ENST00000678623.1;ENST00000678633.1;ENST00000678684.1;ENST00000678731.1;ENST00000678955.1;ENST00000679055.1	3UTR	63	52	15	0		43	37	15	4
chr2	182756335	182756336	potential G-triplex & G>=40%	+	chr2:182756276-182756336:+	FALSE	5'- TATATATATGTTATAATGGAAGCTATATTCTCTTCAGGATCTTATGAATCCTTCAGTGGTCTCCCTTACA -3' rG4seq-K -----------------------------------------------------------*----------	DNAJC10|ENSG00000077232.19	ENST00000264065.12;ENST00000418559.6;ENST00000491074.6;ENST00000616986.5;ENST00000650903.2;ENST00000679491.1;ENST00000679526.1;ENST00000679884.1;ENST00000680060.1;ENST00000680258.1;ENST00000680480.1;ENST00000680484.1;ENST00000680667.1;ENST00000681122.1;ENST00000681139.1;ENST00000681146.1;ENST00000681873.1	3UTR;CDS	119	79	23	0		56	45	10	1
chr2	216500016	216500017	potential G-quadruplex & G>=40%	+	chr2:216499957-216500017:+	FALSE	5'- AAGAGACGAGCTGTGGGGATCTGGCACTGTGGTTCCTGCATGAAGACAGTGGCTGGCGGTGCCTGGACGT -3' rG4seq-K -----------------------------------------------------------*----------	RPL37A|ENSG00000197756.10	ENST00000359681.3;ENST00000420712.1;ENST00000427280.6;ENST00000441179.2;ENST00000446558.5;ENST00000456586.5;ENST00000478153.1;ENST00000487233.1;ENST00000490649.1;ENST00000491306.6;ENST00000598925.5;ENST00000600880.5	3UTR;CDS	89	51	14	0		31	21	9	0
chr20	18530696	18530697	two-quartet	+	chr20:18527609-18527611:+,chr20:18530679-18530697:+	TRUE	5'- GGAGGCTACATGGTAATGGGAGATTCTTTC -3' rG4seq-K -------------------*----------	SEC23B|ENSG00000101310.17	ENST00000262544.6;ENST00000336714.8;ENST00000377465.6;ENST00000643747.1;ENST00000650089.1	CDS	193	163	15	1		74	61	12	2
chr20	37234033	37234034	two-quartet	+	chr20:37230049-37230059:+,chr20:37234019-37234033:+	TRUE	5'- GGAAATTCAGTGGATCCGGATTGGTGCCAATGTC -3' rG4seq-K ------------------------*---------	RPN2|ENSG00000118705.17	ENST00000237530.11;ENST00000373622.9;ENST00000437329.5;ENST00000456400.1;ENST00000470352.1	CDS	127	102	13	1		65	53	17	1
chr20	49280540	49280541	potential G-quadruplex & G>=40%	+	chr20:49280481-49280541:+	FALSE	5'- CAGGTTTATTGTTGGCCAAAACCAGGCTTTGATTGAACCAGGATGAATGCGGGTGTTGGAAGTAGAATAT -3' rG4seq-K -----------------------------------------------------------*----------	ENSG00000277967|ENSG00000277967.1;ZFAS1|ENSG00000177410.13	ENST00000326677.9;ENST00000371743.8;ENST00000417721.5;ENST00000428008.6;ENST00000441722.5;ENST00000450535.5;ENST00000458653.5;ENST00000615977.1;ENST00000620594.2;ENST00000623640.1;ENST00000652916.1;ENST00000659056.1	non_coding	60	49	9	0		37	31	14	4
chr20	58911045	58911046	potential G-quadruplex & G>=40%	+	chr20:58910986-58911046:+	FALSE	5'- TTGCTTAGATGTTCCAAATTTAGAAAGCTTAAGGCGGCCTACAGAAAAAGGAAAAAAGGCCACAAAAGTT -3' rG4seq-K -----------------------------------------------------------*----------	GNAS|ENSG00000087460.29	ENST00000265620.11;ENST00000313949.11;ENST00000349036.9;ENST00000354359.12;ENST00000371075.7;ENST00000371085.8;ENST00000371095.7;ENST00000371100.9;ENST00000371102.8;ENST00000419558.7;ENST00000453292.7;ENST00000462499.6;ENST00000464624.7;ENST00000464788.6;ENST00000467227.6;ENST00000467321.6;ENST00000468895.6;ENST00000469431.6;ENST00000470512.6;ENST00000472183.6;ENST00000476196.5;ENST00000476935.6;…	3UTR	91	62	46	2		59	36	23	0
chr3	128060578	128060579	two-quartet	+	chr3:128060558-128060578:+	FALSE	5'- GGATATGGCCTTGGCTCTGGTATTTCTCTC -3' rG4seq-K --------------------*---------	SEC61A1|ENSG00000058262.10	ENST00000243253.8;ENST00000424880.2;ENST00000464451.5	CDS	290	221	34	7		147	114	23	3
chr3	128070168	128070169	two-quartet	+	chr3:128070145-128070168:+	FALSE	5'- GGCGTGGGAATATCTGGCTTAGGACTGTTTCTC -3' rG4seq-K -----------------------*---------	SEC61A1|ENSG00000058262.10	ENST00000243253.8;ENST00000424880.2;ENST00000483956.1	3UTR	189	121	30	1		121	69	27	4
chr3	186788834	186788835	two-quartet	+	chr3:186788813-186788835:+	FALSE	5'- GGCTGGCCCACTTTGGTATGGGCTTTAATTTC -3' rG4seq-K ---------------------*----------	EIF4A2|ENSG00000156976.17	ENST00000323963.10;ENST00000425053.5;ENST00000426808.5;ENST00000429589.5;ENST00000440191.6;ENST00000443963.5;ENST00000485101.5;ENST00000494445.1;ENST00000496382.1	non_coding	76	62	9	0		43	37	8	1
chr4	74387150	74387151	potential G-quadruplex & G>=40%	+	chr4:74387091-74387151:+	FALSE	5'- ACATTAGGTATTACAAGTAATGTAAAGATGATTTAAGTATACAGGAGGATGTGAATAGGTTATATGCAAG -3' rG4seq-K -----------------------------------------------------------*----------	EREG|ENSG00000124882.4	ENST00000244869.3	3UTR	67	55	8	2		39	34	11	2
chr4	75770850	75770851	potential G-triplex & G>=40%	+	chr4:75770791-75770851:+	FALSE	5'- TGTTAAATATTTTGAATTCTTACATTGCAGGAGTTTGATTTCCATGTCCGCTGGCCTGGTGTGAAGCTTC -3' rG4seq-K -----------------------------------------------------------*----------	USO1|ENSG00000138768.15	ENST00000264904.8;ENST00000512893.1;ENST00000514213.7	CDS	124	113	7	1		66	63	11	0
chr4	165342898	165342899	potential G-quadruplex & G>=40%	+	chr4:165342839-165342899:+	FALSE	5'- ATTGCAGTGCAGTACTGGCATTTCTGAATGGATGTAAGTGGAGTATTTTAGTCTAAAGGCTTTTCAAATT -3' rG4seq-K -----------------------------------------------------------*----------	MSMO1|ENSG00000052802.13	ENST00000261507.11;ENST00000393766.6	3UTR	107	53	46	3		65	27	51	1
chr4	183448068	183448070	potential G-triplex & G>=40%	+	chr4:183448010-183448070:+	FALSE	5'- TCACCATGACTTTGACCGCTGAAGATTCTTTAAGCGGGTTAATTTATGTTTTGAGGTGGAATACAATTTA -3' rG4seq-K ----------------------------------------------------------**----------	CDKN2AIP|ENSG00000168564.6	ENST00000302350.4;ENST00000504169.2	3UTR	80	57	34	6		43	30	19	3
chr5	138468240	138468241	two-quartet	+	chr5:138468221-138468240:+	FALSE	5'- GGAGTGGAAGGTCTATTGGCCAACAATCC -3' rG4seq-K -------------------*---------	EGR1|ENSG00000120738.8	ENST00000239938.5	3UTR	371	254	84	14		204	140	61	4
chr5	139627398	139627400	potential G-quadruplex & G>=40%	+	chr5:139627340-139627400:+	FALSE	5'- AAGTTTAACTGGTCAACATTTAAATGGATTGGAGCTATTAGTACATCAAGTGTGATGGGCTTTGTTCCCA -3' rG4seq-K ----------------------------------------------------------**----------	UBE2D2|ENSG00000131508.16	ENST00000398733.8;ENST00000398734.8	3UTR	124	72	12	1		89	43	16	2
chr5	179709016	179709017	potential G-quadruplex & G>=40%	+	chr5:179708957-179709017:+	FALSE	5'- GCTTTTCTCTCTGATATTAGGTATGAGGTTAATTTCCAAAATGGAATAGAATGTGGTGGTGCCTATGTGA -3' rG4seq-K -----------------------------------------------------------*----------	CANX|ENSG00000127022.16	ENST00000247461.9;ENST00000452673.6;ENST00000502296.6;ENST00000502673.6;ENST00000504734.5;ENST00000506654.6;ENST00000509563.2;ENST00000513246.6;ENST00000514032.5;ENST00000679395.1;ENST00000679471.1;ENST00000679523.1;ENST00000679527.1;ENST00000679642.1;ENST00000679719.1;ENST00000680006.1;ENST00000680013.1;ENST00000680042.1;ENST00000680092.1;ENST00000680406.1;ENST00000680504.1;ENST00000680614.1;ENS…	3UTR;CDS	59	46	6	0		35	34	6	0
chr5	179716162	179716163	potential G-triplex & G>=40%	+	chr5:179716103-179716163:+	FALSE	5'- GTCTTGAATCCAGATAATAGTTTTGAAATACTGGTTGACCAATCTGTGGTGAATAGTGGAAATCTGCTCA -3' rG4seq-K -----------------------------------------------------------*----------	CANX|ENSG00000127022.16	ENST00000247461.9;ENST00000452673.6;ENST00000502296.6;ENST00000502673.6;ENST00000504734.5;ENST00000506654.6;ENST00000509563.2;ENST00000513246.6;ENST00000514032.5;ENST00000679395.1;ENST00000679471.1;ENST00000679523.1;ENST00000679527.1;ENST00000679642.1;ENST00000679719.1;ENST00000680006.1;ENST00000680013.1;ENST00000680042.1;ENST00000680092.1;ENST00000680406.1;ENST00000680504.1;ENST00000680614.1;ENS…	3UTR;CDS	60	47	18	1		28	19	10	0
chr5	179722902	179722903	potential G-quadruplex & G>=40%	+	chr5:179722843-179722903:+	FALSE	5'- TTGAAGATCTGGAACCTTTCAGAATGACTCCTTTTAGTGCTATTGGTTTGGAGCTGTGGTCCATGACCTC -3' rG4seq-K -----------------------------------------------------------*----------	CANX|ENSG00000127022.16	ENST00000247461.9;ENST00000452673.6;ENST00000502296.6;ENST00000502673.6;ENST00000504734.5;ENST00000506654.6;ENST00000509563.2;ENST00000513246.6;ENST00000514032.5;ENST00000679395.1;ENST00000679471.1;ENST00000679523.1;ENST00000679527.1;ENST00000679642.1;ENST00000679719.1;ENST00000680006.1;ENST00000680013.1;ENST00000680042.1;ENST00000680092.1;ENST00000680406.1;ENST00000680504.1;ENST00000680614.1;ENS…	3UTR;CDS	402	381	28	6		222	205	16	6
chr6	30725007	30725008	potential G-triplex & G>=40%	+	chr6:30724948-30725008:+	FALSE	5'- CACTTTCAATCTCCCTCCAAGCTCTACTCTGGAGGAGTCTGTCCCACTCTGTCAAGTGGAATCCTTCCCT -3' rG4seq-K -----------------------------------------------------------*----------	TUBB|ENSG00000196230.14	ENST00000327892.13;ENST00000330914.7;ENST00000396384.1;ENST00000396389.5;ENST00000680530.1;ENST00000681421.1;ENST00000681435.1	3UTR	154	114	31	3		82	61	14	0
chr6	34245454	34245457	potential G-quadruplex & G>=40%	+	chr6:34245397-34245457:+	FALSE	5'- GAGGGGGGTGCTGGCCCCCAGGATTCCCCCAGCCAAACTGTCTTTGTCACCACGTGGGGCTCACTTTTCA -3' rG4seq-K ---------------------------------------------------------***----------	HMGA1|ENSG00000137309.20	ENST00000311487.9;ENST00000347617.10;ENST00000374116.3;ENST00000401473.7;ENST00000447654.5	3UTR	269	105	137	27		154	49	100	11
chr6	36686103	36686104	two-quartet	+	chr6:36686090-36686104:+	FALSE	5'- GGAGGTTGGGTGGGCCGGCTTCAT -3' rG4seq-K -------------*----------	CDKN1A|ENSG00000124762.14	ENST00000244741.10;ENST00000405375.5;ENST00000448526.6;ENST00000615513.4	3UTR	135	124	7	1		57	52	6	2
chr7	108573140	108573141	potential G-quadruplex & G>=40%	+	chr7:108573081-108573141:+	FALSE	5'- AGAAGCGTTTTGAAAATCATTTCCAGACACGCCAGGATGGTGGTTCCAGTAGACAAAGGCATCATTTCCA -3' rG4seq-K -----------------------------------------------------------*----------	DNAJB9|ENSG00000128590.5	ENST00000249356.4;ENST00000465725.1	CDS	56	47	10	0		30	21	7	0
chr7	128770097	128770098	potential G-quadruplex & G>=40%	+	chr7:128770038-128770098:+	FALSE	5'- CTGTAAATGCCCCCATCCGGTTCCTCTTCTTCCCAGGTGTGCCAAGGAATTAATCTTGGTTTCACTACAA -3' rG4seq-K -----------------------------------------------------------*----------	CALU|ENSG00000128595.17	ENST00000249364.9;ENST00000449187.6;ENST00000493278.1;ENST00000535011.6;ENST00000542996.6	3UTR	128	69	60	1		74	45	43	4
chr7	155308436	155308437	potential G-quadruplex & G>=40%	+	chr7:155308377-155308437:+	FALSE	5'- CTGACTGTACAAATGACTCCTGGAAAAAACTCTTCACCTAGTCTAGAATAGGGAGGTGGAGAATGATGAC -3' rG4seq-K -----------------------------------------------------------*----------	INSIG1|ENSG00000186480.13	ENST00000340368.9;ENST00000342407.5;ENST00000344756.8;ENST00000476756.1	3UTR	48	41	15	2		24	20	12	0
chr7	155308533	155308538	two-quartet	+	chr7:155308513-155308537:+	FALSE	5'- GGCTACGTGGGTTCAGGCAGGTGGCAGCTTCCCA -3' rG4seq-K --------------------***-*---------	INSIG1|ENSG00000186480.13	ENST00000340368.9;ENST00000342407.5;ENST00000344756.8;ENST00000476756.1	3UTR	192	106	71	4		128	52	60	7
chr8	38852873	38852874	potential G-quadruplex & G>=40%	+	chr8:38852814-38852874:+	FALSE	5'- CCCTCATCTGGAGGGATGAGTGCTGCGTTGACTACTGCTATCAGGATTGTGTTGTGTGGAATATTCATCT -3' rG4seq-K -----------------------------------------------------------*----------	TACC1|ENSG00000147526.20	ENST00000276520.12;ENST00000317827.9;ENST00000519093.5	3UTR	56	35	10	0		46	38	11	1
chr8	39090079	39090080	potential G-triplex & G>=40%	+	chr8:39090020-39090080:+	FALSE	5'- TGTTGATGTAAAATTCTTCTCTCTAGAAATGAATACTGCATTGAGGGACGGACTTCTGGTCTTCTTCTTC -3' rG4seq-K -----------------------------------------------------------*----------	ADAM9|ENSG00000168615.13	ENST00000379917.7;ENST00000468065.5;ENST00000481058.2;ENST00000481873.7;ENST00000484143.2;ENST00000487273.7;ENST00000676489.1;ENST00000676617.1;ENST00000676643.1;ENST00000676669.1;ENST00000676765.1;ENST00000676919.1;ENST00000676936.1;ENST00000677004.1;ENST00000677137.1;ENST00000677165.1;ENST00000677359.1;ENST00000677582.1;ENST00000677908.1;ENST00000678253.1;ENST00000678474.1;ENST00000678540.1;ENS…	3UTR;CDS	108	51	45	5		53	29	25	3
chr8	119245407	119245408	potential G-quadruplex & G>=40%	+	chr8:119245348-119245408:+	FALSE	5'- AGGTATAGCAGGCTTATGTTTGGTGGCATTAAATTGGTTTCTTTAAAATGCTTTGGTGGCACTTTTGTAA -3' rG4seq-K -----------------------------------------------------------*----------	MAL2|ENSG00000147676.14	ENST00000614891.5	3UTR	167	134	13	1		82	71	9	1
chrM	1351	1352	potential G-quadruplex & G>=40%	+	chrM:1292-1352:+	FALSE	5'- CAAAGTAAGCGCAAGTACCCACGTAAAGACGTTAGGTCAAGGTGTAGCCCATGAGGTGGCAAGAAATGGG -3' rG4seq-K -----------------------------------------------------------*----------	MT-RNR1|ENSG00000211459.2	ENST00000389680.2	non_coding	372	66	272	7		146	36	128	0
chrM	1361	1363	potential G-quadruplex & G>=40%	+	chrM:1303-1363:+	FALSE	5'- CAAGTACCCACGTAAAGACGTTAGGTCAAGGTGTAGCCCATGAGGTGGCAAGAAATGGGCTACATTTTCT -3' rG4seq-K ----------------------------------------------------------**----------	MT-RNR1|ENSG00000211459.2	ENST00000389680.2	non_coding	3409	962	2223	172		1560	436	1416	122
chrM	2645	2648	potential G-quadruplex & G>=40%	+	chrM:2588-2648:+	FALSE	5'- AAAGGTAGCATAATCACTTGTTCCTTAAATAGGGACCTGTATGAATGGCTCCACGAGGGTTCAGCTGTCT -3' rG4seq-K ---------------------------------------------------------***----------	MT-RNR2|ENSG00000210082.2	ENST00000387347.2	non_coding	5959	1760	4211	365		3325	922	2843	228
chrM	2815	2817	potential G-triplex & G>=40%	+	chrM:2757-2817:+	FALSE	5'- GTACCTAACAAACCCACAGGTCCTAAACTACCAAACCTGCATTAAAAATTTCGGTTGGGGCGACCTCGGA -3' rG4seq-K ----------------------------------------------------------**----------	MT-RNR2|ENSG00000210082.2	ENST00000387347.2	non_coding	880	210	1510	109		472	103	1040	83
chrM	2826	2827	potential G-quadruplex & G>=40%	+	chrM:2767-2827:+	FALSE	5'- AACCCACAGGTCCTAAACTACCAAACCTGCATTAAAAATTTCGGTTGGGGCGACCTCGGAGCAGAACCCA -3' rG4seq-K -----------------------------------------------------------*----------	MT-RNR2|ENSG00000210082.2	ENST00000387347.2	non_coding	924	271	714	33		479	134	497	23
chrM	3147	3148	potential G-quadruplex & G>=40%	+	chrM:3088-3148:+	FALSE	5'- AGGTCGGTTTCTATCTACNTTCAAATTCCTCCCTGTACGAAAGGACAAGAGAAATAAGGCCTACTTCACA -3' rG4seq-K -----------------------------------------------------------*----------	MT-RNR2|ENSG00000210082.2	ENST00000387347.2	non_coding	1318	143	1364	55		715	83	908	33
chrM	4974	4976	potential G-triplex & G>=40%	+	chrM:4916-4976:+	FALSE	5'- AACGTAAGCCTTCTCCTCACTCTCTCAATCTTATCCATCATAGCAGGCAGTTGAGGTGGATTAAACCAAA -3' rG4seq-K ----------------------------------------------------------**----------	MT-ND2|ENSG00000198763.3	ENST00000361453.3	CDS	890	833	235	40		492	450	124	20
chrM	6265	6266	potential G-triplex & G>=40%	+	chrM:6206-6266:+	FALSE	5'- TTCTGACTCTTACCTCCCTCTCTCCTACTCCTGCTCGCATCTGCTATAGTGGAGGCCGGAGCAGGAACAG -3' rG4seq-K -----------------------------------------------------------*----------	MT-CO1|ENSG00000198804.2	ENST00000361624.2	CDS	183	102	200	13		107	62	137	8
chrM	12779	12780	potential G-triplex & G>=40%	+	chrM:12720-12780:+	FALSE	5'- CTAATCTTAGTTACCGCTAACAACCTATTCCAACTGTTCATCGGCTGAGAGGGCGTAGGAATTATATCCT -3' rG4seq-K -----------------------------------------------------------*----------	MT-ND5|ENSG00000198786.2	ENST00000361567.2	CDS	964	353	1315	13		516	192	922	8
NC_006213.1	859	861	two-quartet	+	NC_006213.1:835-860:+	FALSE	5'- GGTGCAGGTCAATTCGTGGGTTGGGTCATACCCTT -3' rG4seq-K ------------------------**---------	NA	NA	NA	5940	1590	3856	225		2915	798	2213	143
NC_006213.1	981	982	two-quartet	+	NC_006213.1:964-981:+	FALSE	5'- GGACGTGGCGGTTTTGGACATGTTTAT -3' rG4seq-K -----------------*---------	NA	NA	NA	2206	1076	907	57		906	536	719	41
NC_006213.1	1077	1078	potential G-quadruplex & G>=40%	+	NC_006213.1:1018-1078:+	FALSE	5'- CAGGTGCATGATGAGCCTAAGGGTAAGTTTTCTAAGAAGGCTTATGCTTTAATTAGAGGGTATCGTGGTG -3' rG4seq-K -----------------------------------------------------------*----------	NA	NA	NA	642	102	644	24		370	41	430	12
NC_006213.1	1578	1579	potential G-quadruplex & G>=40%	+	NC_006213.1:1519-1579:+	FALSE	5'- GATTGCGAACAAGACTCGTGTGATTTTAAAGGTTGGATTCCTGGTAACATGATAGATGGTTTTGCTTGCA -3' rG4seq-K -----------------------------------------------------------*----------	NA	NA	NA	2829	219	3036	75		1555	94	1839	56
NC_006213.1	1701	1702	two-quartet	+	NC_006213.1:1684-1701:+	FALSE	5'- GGCTATGGTGGTTTTGGTTGTAAAGAT -3' rG4seq-K -----------------*---------	NA	NA	NA	1557	754	684	79		819	375	472	37
NC_006213.1	1765	1766	potential G-quadruplex & G>=40%	+	NC_006213.1:1706-1766:+	FALSE	5'- AAGATTCTTTTACTCTGTATGGCCAAACTGTAGTTTATTTTGGAGGTTGTGTGTATTGGAGTCCAGCACG -3' rG4seq-K -----------------------------------------------------------*----------	NA	NA	NA	1060	361	734	26		647	197	537	19
NC_006213.1	1868	1869	potential G-quadruplex & G>=40%	+	NC_006213.1:1809-1869:+	FALSE	5'- TAAGTCATATGACAGTTTGGTTTATACTGGAGTTTTAGGTTGCAAGGCTATTGTAAAGGAAACAAATCTC -3' rG4seq-K -----------------------------------------------------------*----------	NA	NA	NA	1748	159	1904	64		1007	84	1334	55
NC_006213.1	1966	1967	potential G-quadruplex & G>=40%	+	NC_006213.1:1907-1967:+	FALSE	5'- TTCAACACAAGTGTGGCAATTTACACCAACGGGAGTTGCTAGGTGTTTCAGATGTGTGGCATAAACAATT -3' rG4seq-K -----------------------------------------------------------*----------	NA	NA	NA	603	106	565	31		315	63	499	16
NC_006213.1	2408	2409	potential G-triplex & G>=40%	+	NC_006213.1:2349-2409:+	FALSE	5'- TGCTCTTGCATTTGCATGGGTTTTATTTCATGTTTTGCATGGTGCTTATATAGTAGTGGAGAGTGATATA -3' rG4seq-K -----------------------------------------------------------*----------	NA	NA	NA	16522	459	16596	552		9193	202	11274	367
NC_006213.1	2593	2596	potential G-triplex & G>=40%	+	NC_006213.1:2536-2596:+	FALSE	5'- AAGATTGGACGTAGAAGAATTTGTCTTTCAGGCAGAAAAATTTATGAAGTTGAGCGTGGCTTGTTACATT -3' rG4seq-K ---------------------------------------------------------***----------	NA	NA	NA	27411	1053	33610	939		15015	536	23235	667
NC_006213.1	2829	2830	potential G-quadruplex & G>=40%	+	NC_006213.1:2770-2830:+	FALSE	5'- CCACCTAAAGTTGCAGCTAAAATTTGCATTGTGGATAATGTTTATATGGCCAAGGCTGGTGACAAATATT -3' rG4seq-K -----------------------------------------------------------*----------	NA	NA	NA	21515	3675	8703	1334		11654	2051	6155	920
NC_006213.1	3074	3075	potential G-quadruplex & G>=40%	+	NC_006213.1:3015-3075:+	FALSE	5'- TGCGTGTGGAGTGTTTGAAGTGGATGATACTGTTGATATGGAGGAATTTTATGCTGTGGTGATTGATGCC -3' rG4seq-K -----------------------------------------------------------*----------	NA	NA	NA	15484	718	16477	487		8358	378	10308	305
NC_006213.1	3199	3201	potential G-quadruplex & G>=40%	+	NC_006213.1:3141-3201:+	FALSE	5'- TGCCTTTTTACAGAAATTAGAGGATAATCCCCTATTTTTATTTGATGAGGCTGGCGAGGAAGTTCTTGCT -3' rG4seq-K ----------------------------------------------------------**----------	NA	NA	NA	966	604	210	28		461	295	160	24
NC_006213.1	4275	4276	two-quartet	+	NC_006213.1:4252-4275:+	FALSE	5'- GGCCATATGGCACATGGTGGTGGTGTTGCAAAA -3' rG4seq-K -----------------------*---------	NA	NA	NA	116	77	32	0		63	40	14	2
NC_006213.1	4386	4389	potential G-quadruplex & G>=40%	+	NC_006213.1:4329-4389:+	FALSE	5'- CGATATGGTTAAGTCTAAAGGAGTTTGTGCTACTGGAGATTGTTATGTCTCTACAGGGGGCAAATTATGT -3' rG4seq-K ---------------------------------------------------------***----------	NA	NA	NA	217	81	150	12		106	41	76	8
NC_006213.1	5325	5326	potential G-triplex & G>=40%	+	NC_006213.1:5266-5326:+	FALSE	5'- TTGCTTGCCTATTACAACATGCTTGTTAATTGTTTTAAGTGGCAGGTTGTTGTTAATGGTAAGTATTTCA -3' rG4seq-K -----------------------------------------------------------*----------	NA	NA	NA	327	154	164	11		157	80	96	7
NC_006213.1	5508	5509	two-quartet	+	NC_006213.1:5478-5508:+	FALSE	5'- GGTTTTGGCCAAAGGTGGGTTTAAATTTGGAGATCCTGCT -3' rG4seq-K ------------------------------*---------	NA	NA	NA	182	83	57	1		84	32	31	1
NC_006213.1	5829	5830	potential G-quadruplex & G>=40%	+	NC_006213.1:5770-5830:+	FALSE	5'- AGTGTAAAATTACCTAAGGGTGTAGGAAGTGCAAATATTTTTATAGGTGATAAGGTTGGTCATTATGTTC -3' rG4seq-K -----------------------------------------------------------*----------	NA	NA	NA	400	86	221	11		231	57	145	8
NC_006213.1	6940	6943	potential G-triplex & G>=40%	+	NC_006213.1:6883-6943:+	FALSE	5'- GTAGCTTTAGCTTTTAAAAATGCATTTTTGACATTTAAGTGGAGTATGGTTGCTAGAGGTGCTTGCATTA -3' rG4seq-K ---------------------------------------------------------***----------	NA	NA	NA	421	273	129	11		268	149	122	9
NC_006213.1	7070	7071	potential G-triplex & G>=40%	+	NC_006213.1:7011-7071:+	FALSE	5'- TTTTTATTTGCCTAAAATCGGTTTCTTGCCGACTTTTGTTGGTAAGATTGCACAGTGGATTAAGAACACT -3' rG4seq-K -----------------------------------------------------------*----------	NA	NA	NA	257	126	196	25		110	63	127	20
NC_006213.1	7421	7422	two-quartet	+	NC_006213.1:7400-7421:+	FALSE	5'- GGAGTTTTAGGTTGCTGGTGGCTTTAGCTAA -3' rG4seq-K ---------------------*---------	NA	NA	NA	531	441	106	12		267	227	78	4
NC_006213.1	7635	7636	potential G-quadruplex & G>=40%	+	NC_006213.1:7576-7636:+	FALSE	5'- AAATGTAGTACTATCGTTGGTGGCATGATACGCTATTACGATGTTATGGCTAATGGTGGCACTGGCTTTT -3' rG4seq-K -----------------------------------------------------------*----------	NA	NA	NA	278	213	28	2		89	73	33	4
NC_006213.1	7641	7642	two-quartet	+	NC_006213.1:7623-7641:+	FALSE	5'- GGCTAATGGTGGCACTGGCTTTTGTTCA -3' rG4seq-K ------------------*---------	NA	NA	NA	765	438	70	15		311	194	53	6
NC_006213.1	9319	9320	potential G-quadruplex & G>=40%	+	NC_006213.1:9260-9320:+	FALSE	5'- GAGTTGGATTATGTGAGGAAGCTGATGAGGGTATATGCTTTAATTTTAATGGTTCTTGGGTGCTTAATAA -3' rG4seq-K -----------------------------------------------------------*----------	NA	NA	NA	253	50	207	4		110	23	134	1
NC_006213.1	10193	10194	two-quartet	+	NC_006213.1:10171-10193:+	FALSE	5'- GGTTTATGGTTGGATGACAAGGTCTACTGTCC -3' rG4seq-K ----------------------*---------	NA	NA	NA	159	103	53	4		92	55	31	3
NC_006213.1	10547	10550	potential G-quadruplex & G>=40%	+	NC_006213.1:10490-10550:+	FALSE	5'- CCATTAAGGGTTCCTTTTTATGCGGATCTTGTGGATCTGTTGGTTATGTAATAATGGGTGATTGTGTTAA -3' rG4seq-K ---------------------------------------------------------***----------	NA	NA	NA	643	96	341	13		320	56	265	7
NC_006213.1	10624	10627	potential G-quadruplex & G>=40%	+	NC_006213.1:10567-10627:+	FALSE	5'- TATATGCATCAATTGGAGCTTAGTACTGGTTGTCATACTGGTACTGACTTCAATGGGGATTTTTATGGTC -3' rG4seq-K ---------------------------------------------------------***----------	NA	NA	NA	248	55	178	13		147	37	114	7
NC_006213.1	11495	11496	potential G-quadruplex & G>=40%	+	NC_006213.1:11436-11496:+	FALSE	5'- TGTTTTCTCTTTGTGGTACAAGGGTTCTAACTTAGAGGAAGAAATTCTTCTTATGTTGGCTTCCCTTTTT -3' rG4seq-K -----------------------------------------------------------*----------	NA	NA	NA	433	84	275	6		212	31	178	1
NC_006213.1	11566	11567	potential G-quadruplex & G>=40%	+	NC_006213.1:11507-11567:+	FALSE	5'- GTACTTACACATGGACAACAGTTTTATCTATGGCTGTAGCAAAGGTTATTGCTAAGTGGGTTGCTGTGAA -3' rG4seq-K -----------------------------------------------------------*----------	NA	NA	NA	58	23	31	0		34	18	15	0
NC_006213.1	13009	13010	potential G-triplex & G>=40%	+	NC_006213.1:12950-13010:+	FALSE	5'- GTCTTAAAATTAAGTACCTTTATTTTGTAAAAGGTTGTAACACACTAGCAAGAGGCTGGGTTGTTGGTAC -3' rG4seq-K -----------------------------------------------------------*----------	NA	NA	NA	361	140	209	13		188	74	130	11
NC_006213.1	13017	13018	potential G-quadruplex & G>=40%	+	NC_006213.1:12958-13018:+	FALSE	5'- ATTAAGTACCTTTATTTTGTAAAAGGTTGTAACACACTAGCAAGAGGCTGGGTTGTTGGTACAATTTCTT -3' rG4seq-K -----------------------------------------------------------*----------	NA	NA	NA	593	203	150	13		272	91	81	9
NC_006213.1	13050	13051	potential G-quadruplex & G>=40%	+	NC_006213.1:12991-13051:+	FALSE	5'- ACACTAGCAAGAGGCTGGGTTGTTGGTACAATTTCTTCTACAGTTAGATTGCAAGCTGGAACTGCTACTG -3' rG4seq-K -----------------------------------------------------------*----------	NA	NA	NA	160	68	97	13		87	40	59	3
NC_006213.1	13419	13420	two-quartet	+	NC_006213.1:13402-13419:+	FALSE	5'- GGATTTTGGCGGGATGGAAGTTGTTCA -3' rG4seq-K -----------------*---------	NA	NA	NA	317	164	134	5		131	63	103	4
NC_006213.1	13941	13942	potential G-triplex & G>=40%	+	NC_006213.1:13882-13942:+	FALSE	5'- GTGACATTCTCTCTATATATGCTGGTTGTGAACAATCCTACTTTACTAAGAAGGATTGGTATGATTTTGT -3' rG4seq-K -----------------------------------------------------------*----------	NA	NA	NA	151	78	117	12		73	34	98	6
NC_006213.1	14054	14055	two-quartet	+	NC_006213.1:14033-14054:+	FALSE	5'- GGACAAATTGGTGGAGGTAGGCTTAGTAGGC -3' rG4seq-K ---------------------*---------	NA	NA	NA	302	268	22	7		149	137	19	6
NC_006213.1	14453	14454	potential G-quadruplex & G>=40%	+	NC_006213.1:14394-14454:+	FALSE	5'- AGTATGGTTTTACCTAATACATGTTTTGGGCCTCTTGTTAGGCAAATTTTTGTGGATGGTGTGCCTTTTG -3' rG4seq-K -----------------------------------------------------------*----------	NA	NA	NA	163	96	54	2		92	57	33	3
NC_006213.1	14521	14522	potential G-quadruplex & G>=40%	+	NC_006213.1:14462-14522:+	FALSE	5'- TGTTGTTTCAATTGGCTACCATTATAAAGAACTTGGTATTGTGATGAATATGGATGTGGATACACATCGT -3' rG4seq-K -----------------------------------------------------------*----------	NA	NA	NA	180	97	87	10		106	56	53	9
NC_006213.1	14863	14864	potential G-triplex & G>=40%	+	NC_006213.1:14804-14864:+	FALSE	5'- TTATTATAAGTATAATTTGCCCACCATGGTGGACATTAAGCAGTTGTTGTTTGTTTTGGAAGTTGTTTAT -3' rG4seq-K -----------------------------------------------------------*----------	NA	NA	NA	172	87	116	15		109	56	59	6
NC_006213.1	15237	15238	potential G-quadruplex & G>=40%	+	NC_006213.1:15178-15238:+	FALSE	5'- TAGCAGCTACACGTGGTGTTCCTGTAGTTATAGGCACCACTAAATTTTATGGTGGCTGGGATGATATGTT -3' rG4seq-K -----------------------------------------------------------*----------	NA	NA	NA	165	137	38	2		100	82	31	4
NC_006213.1	15491	15492	potential G-quadruplex & G>=40%	+	NC_006213.1:15432-15492:+	FALSE	5'- AGTGAAATTGTTATGTGTGGTGGCTGTTATTATGTTAAGCCTGGTGGCACTAGTAGTGGTGATGCAACTA -3' rG4seq-K -----------------------------------------------------------*----------	NA	NA	NA	463	354	51	9		274	204	37	7
NC_006213.1	16511	16512	two-quartet	+	NC_006213.1:16487-16511:+	FALSE	5'- GGTAATGAATGGTCTGGTTTTTGGTCTATATAAA -3' rG4seq-K ------------------------*---------	NA	NA	NA	327	178	140	7		179	98	95	3
NC_006213.1	19417	19418	potential G-quadruplex & G>=40%	+	NC_006213.1:19358-19418:+	FALSE	5'- ATTCTTCTATTATTCAGATACGCCTTGTGTGTATATGGATGGCATGGATGCTAAGCAGGTTGATTATGTA -3' rG4seq-K -----------------------------------------------------------*----------	NA	NA	NA	148	83	46	6		85	48	32	3
NC_006213.1	19670	19671	potential G-quadruplex & G>=40%	+	NC_006213.1:19611-19671:+	FALSE	5'- AGCTTGGAGAATGTTGTATATAATTTAGTCAAGACTGGTCATTATACAGGACAGGCTGGTGAAATGCCTT -3' rG4seq-K -----------------------------------------------------------*----------	NA	NA	NA	203	167	49	6		109	90	41	3
NC_006213.1	19726	19727	potential G-quadruplex & G>=40%	+	NC_006213.1:19667-19727:+	FALSE	5'- TGGTGAAATGCCTTGTGCCATTATAAATGATAAAGTTGTGGCTAAGATCGATAAGGAGGATGTTGTCATT -3' rG4seq-K -----------------------------------------------------------*----------	NA	NA	NA	398	339	98	38		225	193	56	23
NC_006213.1	20095	20096	potential G-quadruplex & G>=40%	+	NC_006213.1:20036-20096:+	FALSE	5'- TAAGAGTCTTTCGATGATAAGAGGTCCACCGCGTGCTGAATTAAATGGCGTAGTGGTGGACAAGGTTGGA -3' rG4seq-K -----------------------------------------------------------*----------	NA	NA	NA	71	55	20	7		48	34	29	1
NC_006213.1	20247	20250	two-quartet	+	NC_006213.1:20226-20249:+	FALSE	5'- GGTAAACCCGGTAATGTCGGTGGTAATGATGCT -3' rG4seq-K ---------------------*-*---------	NA	NA	NA	1173	359	828	115		566	178	555	81
NC_006213.1	20382	20384	potential G-quadruplex & G>=40%	+	NC_006213.1:20324-20384:+	FALSE	5'- GGAAAAAGATTTTATAGCTTTAGATCAAGATGTGTTTATTCAGAAGTATGGTTTGGAGGACTATGCCTTT -3' rG4seq-K ----------------------------------------------------------**----------	NA	NA	NA	246	116	192	26		95	44	129	22
NC_006213.1	21455	21456	potential G-quadruplex & G>=40%	+	NC_006213.1:21396-21456:+	FALSE	5'- GGAAATGTTATGCATGCCAATTATTTGTTTTGGAGAAATTCCACAGTTTGGAACGGGGGTGCTTATAGCC -3' rG4seq-K -----------------------------------------------------------*----------	NA	NA	NA	110	73	25	1		59	39	36	5
NC_006213.1	22028	22029	potential G-quadruplex & G>=40%	+	NC_006213.1:21969-22029:+	FALSE	5'- TTAGTTAATTACATTCGTGATAAAGGTTGTGTTGCTGACCAATCCAGGAAATGGATTGGCCATTGCACCA -3' rG4seq-K -----------------------------------------------------------*----------	NA	NA	NA	245	93	128	13		104	47	74	5
NC_006213.1	23512	23513	potential G-quadruplex & G>=40%	+	NC_006213.1:23453-23513:+	FALSE	5'- TATGTTGGTGTTTATGATATTAATCATGGAGATGCTGGTTTTACTAGCATACTTAGTGGTTTGTTATATA -3' rG4seq-K -----------------------------------------------------------*----------	NA	NA	NA	1224	587	518	41		627	296	351	20
NC_006213.1	24263	24264	potential G-quadruplex & G>=40%	+	NC_006213.1:24204-24264:+	FALSE	5'- ACCACGTACAATCAATTCAACACAGGATGGTGATAATAAATTACAAGGTCTTTTAGAGGTCTCTGTTTGC -3' rG4seq-K -----------------------------------------------------------*----------	NA	NA	NA	873	430	454	11		489	236	301	8
NC_006213.1	25016	25018	potential G-quadruplex & G>=40%	+	NC_006213.1:24958-25018:+	FALSE	5'- AGCATAACTATAGATAAGTTTGCTATACCCAATGGCAGGAAGGTTGACCTACAATTGGGTAATTTGGGCT -3' rG4seq-K ----------------------------------------------------------**----------	NA	NA	NA	932	292	539	43		459	155	387	29
NC_006213.1	25025	25027	potential G-quadruplex & G>=40%	+	NC_006213.1:24967-25027:+	FALSE	5'- ATAGATAAGTTTGCTATACCCAATGGCAGGAAGGTTGACCTACAATTGGGTAATTTGGGCTATTTGCAGT -3' rG4seq-K ----------------------------------------------------------**----------	NA	NA	NA	2888	1038	753	69		1417	499	479	47
NC_006213.1	25314	25315	potential G-quadruplex & G>=40%	+	NC_006213.1:25255-25315:+	FALSE	5'- CCGTGTAAATTGAATGGTTCGTGTGTAGGTAGTGGTCCTGGTAAAAATAATGGTATAGGCACTTGTCCTG -3' rG4seq-K -----------------------------------------------------------*----------	NA	NA	NA	291	63	248	21		201	37	160	6
NC_006213.1	25442	25443	potential G-quadruplex & G>=40%	+	NC_006213.1:25383-25443:+	FALSE	5'- AGGTACTTATAAGTGCCCCCAAACTAAATCTTTAGTTGGCATAGGTGAGCACTGTTCGGGTCTTGCTGTT -3' rG4seq-K -----------------------------------------------------------*----------	NA	NA	NA	338	150	224	21		178	70	153	10
NC_006213.1	25473	25474	potential G-quadruplex & G>=40%	+	NC_006213.1:25414-25474:+	FALSE	5'- TTAGTTGGCATAGGTGAGCACTGTTCGGGTCTTGCTGTTAAAAGTGATTATTGTGGAGGCAATTCTTGTA -3' rG4seq-K -----------------------------------------------------------*----------	NA	NA	NA	584	264	379	26		304	123	250	17
NC_006213.1	25513	25514	potential G-quadruplex & G>=40%	+	NC_006213.1:25454-25514:+	FALSE	5'- AAAGTGATTATTGTGGAGGCAATTCTTGTACTTGCCGACCACAAGCATTTTTGGGTTGGTCTGCAGACTC -3' rG4seq-K -----------------------------------------------------------*----------	NA	NA	NA	824	454	416	36		428	204	256	31
NC_006213.1	25694	25695	potential G-quadruplex & G>=40%	+	NC_006213.1:25635-25695:+	FALSE	5'- TGGTGTTTGTGTTAATTATGACCTCTATGGTATTTTAGGCCAAGGCATTTTTGTTGAGGTTAATGCGACT -3' rG4seq-K -----------------------------------------------------------*----------	NA	NA	NA	581	185	410	66		287	83	297	38
NC_006213.1	25720	25721	potential G-quadruplex & G>=40%	+	NC_006213.1:25661-25721:+	FALSE	5'- ATGGTATTTTAGGCCAAGGCATTTTTGTTGAGGTTAATGCGACTTATTATAATAGTTGGCAGAACCTTTT -3' rG4seq-K -----------------------------------------------------------*----------	NA	NA	NA	837	208	665	58		421	92	465	38
NC_006213.1	26188	26190	potential G-quadruplex & G>=40%	+	NC_006213.1:26130-26190:+	FALSE	5'- TGTAGGTGGTTTGTATGAAATTCAAATACCTTCAGAGTTTACTATAGGTAATATGGTGGAGTTTATTCAA -3' rG4seq-K ----------------------------------------------------------**----------	NA	NA	NA	2314	1150	1566	196		1242	596	1086	132
NC_006213.1	26587	26589	potential G-quadruplex & G>=40%	+	NC_006213.1:26529-26589:+	FALSE	5'- ATCTGATGTCGGTTTTGTTGAGGCTTATAATAATTGTACAGGAGGTGCCGAAATTAGGGACCTCATTTGT -3' rG4seq-K ----------------------------------------------------------**----------	NA	NA	NA	728	193	413	30		381	94	225	14
NC_006213.1	27171	27172	potential G-quadruplex & G>=40%	+	NC_006213.1:27112-27172:+	FALSE	5'- GAGAAGGTTAATGAATGTGTCAAAAGCCAATCATCTAGGATAAATTTCTGTGGTAATGGTAATCATATTA -3' rG4seq-K -----------------------------------------------------------*----------	NA	NA	NA	1245	342	1096	119		677	184	747	101
NC_006213.1	27358	27362	potential G-quadruplex & G>=40%	+	NC_006213.1:27302-27362:+	FALSE	5'- CTCCTAAGAGTGGTTATTTTGTTAATGTAAATAATACTTGGATGTACACTGGTAGTGGTTACTACTACCC -3' rG4seq-K --------------------------------------------------------****----------	NA	NA	NA	6042	1009	5080	418		3103	504	3573	282
NC_006213.1	27502	27503	potential G-triplex & G>=40%	+	NC_006213.1:27443-27503:+	FALSE	5'- TAATGCTGAACACTTCAATACCCAACCTTCCTGATTTTAAGGAAGAGTTGGATCAATGGTTTAAAAATCA -3' rG4seq-K -----------------------------------------------------------*----------	NA	NA	NA	1410	735	1101	43		695	366	722	36
NC_006213.1	27599	27600	potential G-quadruplex & G>=40%	+	NC_006213.1:27540-27600:+	FALSE	5'- TGATTATATAAATGTTACATTCTTGGACCTACAAGTTGAAATGAATAGGTTACAGGAGGCAATAAAAGTC -3' rG4seq-K -----------------------------------------------------------*----------	NA	NA	NA	2536	522	1795	63		1330	255	1135	48
NC_006213.1	27685	27686	potential G-quadruplex & G>=40%	+	NC_006213.1:27626-27686:+	FALSE	5'- TCAATCTCAAGGACATTGGTACATATGAATATTATGTAAAATGGCCTTGGTATGTATGGCTTTTAATCTG -3' rG4seq-K -----------------------------------------------------------*----------	NA	NA	NA	1670	1285	348	37		806	615	193	12
NC_006213.1	27812	27813	potential G-quadruplex & G>=40%	+	NC_006213.1:27753-27813:+	FALSE	5'- TGGGACTAGTTGTTTTAAGAAATGTGGTGGTTGTTGTGATGATTATACTGGATACCAGGAGTTAGTAATC -3' rG4seq-K -----------------------------------------------------------*----------	NA	NA	NA	1140	555	502	124		618	280	324	85
NC_006213.1	28183	28185	potential G-triplex & G>=40%	+	NC_006213.1:28125-28185:+	FALSE	5'- TTATGATAAATATTTTGGAGTAATAAATGGTTTCACAGCATTCGCTAATACTGTAGAGGATGCTGTTAAC -3' rG4seq-K ----------------------------------------------------------**----------	NA	NA	NA	4229	2405	2972	99		2023	1130	1921	68
NC_006213.1	28293	28296	potential G-quadruplex & G>=40%	+	NC_006213.1:28236-28296:+	FALSE	5'- ACAGGAGTTAAATGTTTATGGCTGATGCTTATCTTGCAGACACTGTGTGGTATGTGGGGCAAATAATTTT -3' rG4seq-K ---------------------------------------------------------***----------	NA	NA	NA	4592	1872	1492	193		2437	1063	1096	144
NC_006213.1	28346	28348	potential G-triplex & G>=40%	+	NC_006213.1:28288-28348:+	FALSE	5'- TGTGGGGCAAATAATTTTTATAGTTGCCATTTGTTTATTGGTTACAATAGTTGTAGTGGCATTTTTGGCA -3' rG4seq-K ----------------------------------------------------------**----------	NA	NA	NA	4589	741	3918	202		2673	391	2948	148
NC_006213.1	28356	28357	potential G-triplex & G>=40%	+	NC_006213.1:28297-28357:+	FALSE	5'- AATAATTTTTATAGTTGCCATTTGTTTATTGGTTACAATAGTTGTAGTGGCATTTTTGGCAACTTTTAAA -3' rG4seq-K -----------------------------------------------------------*----------	NA	NA	NA	3946	796	2463	45		2161	408	1757	33
NC_006213.1	28604	28606	potential G-quadruplex & G>=40%	+	NC_006213.1:28546-28606:+	FALSE	5'- TATATCTGGACTGCTGATGAAGCTATTAAATTCCTAAAGGAATGGAATTTTTCTTTGGGTATTATACTAC -3' rG4seq-K ----------------------------------------------------------**----------	NA	NA	NA	33685	12858	14513	1727		18441	6781	10104	1201
NC_006213.1	29007	29008	potential G-quadruplex & G>=40%	+	NC_006213.1:28948-29008:+	FALSE	5'- CTGACGGTCACAATAATACGCGGCCATCTTTACATTCAAGGTATAAAACTAGGTACTGGCTATTCTTTGG -3' rG4seq-K -----------------------------------------------------------*----------	NA	NA	NA	3553	352	5842	136		1918	177	4019	75
NC_006213.1	29018	29019	potential G-quadruplex & G>=40%	+	NC_006213.1:28959-29019:+	FALSE	5'- AATAATACGCGGCCATCTTTACATTCAAGGTATAAAACTAGGTACTGGCTATTCTTTGGCAGATTTGCCA -3' rG4seq-K -----------------------------------------------------------*----------	NA	NA	NA	4372	512	5289	104		2293	258	3618	60
NC_006213.1	29109	29111	potential G-triplex & G>=40%	+	NC_006213.1:29051-29111:+	FALSE	5'- TTACACACCTGTGCACATATAAGCGTGGTTTTCTTGACAGGATAAGCGATACTAGTGGTTTTGCTGTTTA -3' rG4seq-K ----------------------------------------------------------**----------	NA	NA	NA	4956	904	2924	240		2546	444	2046	149
NC_006213.1	29296	29298	potential G-quadruplex & G>=40%	+	NC_006213.1:29238-29298:+	FALSE	5'- GCAATCCAGTAGTAGAGCGTCCTCTGGAAATCGTTCTGGTAATGGCATCCTCAAGTGGGCCGATCAGTCC -3' rG4seq-K ----------------------------------------------------------**----------	NA	NA	NA	3345	684	3213	340		1894	360	2177	290
NC_006213.1	29335	29336	potential G-triplex & G>=40%	+	NC_006213.1:29276-29336:+	FALSE	5'- GTAATGGCATCCTCAAGTGGGCCGATCAGTCCGACCAGTTTAGAAATGTTCAAACCAGGGGTAGAAGAGC -3' rG4seq-K -----------------------------------------------------------*----------	NA	NA	NA	1760	872	1543	170		918	474	1003	100
NC_006213.1	29386	29389	potential G-triplex & G>=40%	+	NC_006213.1:29329-29389:+	FALSE	5'- ACCAGGGGTAGAAGAGCTCAACCCAAGCAAACTGCTACCTCTCAGCAACCATCAGGAGGGAATGTTGTAC -3' rG4seq-K ---------------------------------------------------------***----------	NA	NA	NA	8296	1866	8892	423		4472	899	6211	330
NC_006213.1	29447	29448	potential G-quadruplex & G>=40%	+	NC_006213.1:29388-29448:+	FALSE	5'- GAATGTTGTACCCTACTATTCTTGGTTCTCTGGAATTACTCAGTTTCAAAAGGGAAAGGAGTTTGAGTTT -3' rG4seq-K -----------------------------------------------------------*----------	NA	NA	NA	1271	271	1476	28		696	153	961	29
NC_006213.1	29727	29730	potential G-quadruplex & G>=40%	+	NC_006213.1:29670-29730:+	FALSE	5'- CCAGGCTGATGTCAATACCCCGGCTGACATTGTCGATCGGGACCCAAGTAGCGATGAGGCTATTCCGACT -3' rG4seq-K ---------------------------------------------------------***----------	NA	NA	NA	6369	662	5338	207		3013	297	3513	132
NC_006213.1	29787	29788	potential G-quadruplex & G>=40%	+	NC_006213.1:29728-29788:+	FALSE	5'- GCTATTCCGACTAGGTTTCCGCCTGGCACGGTACTCCCTCAGGGTTACTATATTGAAGGCTCAGGAAGGT -3' rG4seq-K -----------------------------------------------------------*----------	NA	NA	NA	2139	243	2202	109		1153	129	1489	64
NC_006213.1	29793	29799	potential G-quadruplex & G>=40%	+	NC_006213.1:29739-29799:+	FALSE	5'- TAGGTTTCCGCCTGGCACGGTACTCCCTCAGGGTTACTATATTGAAGGCTCAGGAAGGTCTGCTCCTAAT -3' rG4seq-K ------------------------------------------------------*-*-**----------	NA	NA	NA	32381	7737	19439	2082		16117	3699	13065	1499
NC_006213.1	29957	29958	potential G-quadruplex & G>=40%	+	NC_006213.1:29898-29958:+	FALSE	5'- TGTAACACCTGACATGGCTGATCAAATTGCTAGTCTTGTTCTGGCAAAACTTGGCAAGGATGCCACTAAA -3' rG4seq-K -----------------------------------------------------------*----------	NA	NA	NA	3772	430	4813	306		1914	215	3279	163
NC_006213.1	30108	30112	potential G-quadruplex & G>=40%	+	NC_006213.1:30052-30112:+	FALSE	5'- CAATGCACTGTTCAGCAGTGTTTTGGTAAGAGAGGCCCTAATCAGAATTTTGGTGGTGGAGAAATGTTAA -3' rG4seq-K --------------------------------------------------------*-**----------	NA	NA	NA	8036	3258	6022	601		4453	1884	3972	388
NC_006213.1	30129	30130	potential G-quadruplex & G>=40%	+	NC_006213.1:30070-30130:+	FALSE	5'- TGTTTTGGTAAGAGAGGCCCTAATCAGAATTTTGGTGGTGGAGAAATGTTAAAACTTGGAACTAGTGACC -3' rG4seq-K -----------------------------------------------------------*----------	NA	NA	NA	18970	8651	8641	800		10114	4565	5973	575
NC_006213.1	30212	30213	potential G-triplex & G>=40%	+	NC_006213.1:30153-30213:+	FALSE	5'- TCTTGCAGAACTCGCACCCACAGCTGGTGCGTTTTTCTTTGGATCAAGATTAGAGTTGGCCAAAGTGCAG -3' rG4seq-K -----------------------------------------------------------*----------	NA	NA	NA	2192	299	2561	109		1144	161	1779	80
NC_006213.1	30258	30259	potential G-triplex & G>=40%	+	NC_006213.1:30199-30259:+	FALSE	5'- AGATTAGAGTTGGCCAAAGTGCAGAATTTATCTGGGAATCCTGACGAGCCCCAGAAGGATGTTTATGAAT -3' rG4seq-K -----------------------------------------------------------*----------	NA	NA	NA	2535	585	2203	259		1325	290	1477	174
NC_006213.1	30429	30430	potential G-quadruplex & G>=40%	+	NC_006213.1:30370-30430:+	FALSE	5'- GGTATGATGAATATGAGTCCAAAACCACAGCGTCAGCGTGGTCATAAGAATGGACAAGGAGAAAATGATA -3' rG4seq-K -----------------------------------------------------------*----------	NA	NA	NA	804	108	875	42		434	56	554	21
chr1	8012633	8012634	potential G-quadruplex & G>=40%	-	chr1:8012633-8012693:-	FALSE	5'- CATTTATTTTTGCAGGCAATCTTTTCCATGGAGGGCAGGGTATCCATTCTTTACCATGGGTGTACCTGCT -3' rG4seq-K -----------------------------------------------------------*----------	ERRFI1|ENSG00000116285.13	ENST00000377482.10;ENST00000474874.5	3UTR	184	102	55	5		86	47	25	4
chr1	8012653	8012654	potential G-quadruplex & G>=40%	-	chr1:8012653-8012713:-	FALSE	5'- AGGCCTTTTCTATTTTGTTCCATTTATTTTTGCAGGCAATCTTTTCCATGGAGGGCAGGGTATCCATTCT -3' rG4seq-K -----------------------------------------------------------*----------	ERRFI1|ENSG00000116285.13	ENST00000377482.10;ENST00000474874.5	3UTR	170	151	26	2		81	72	21	1
chr1	8012959	8012962	bulges	-	chr1:8012960-8012984:-	FALSE	5'- GATGGTGGGGAGGGGAGGATGGGGAAGCTTTTTA -3' rG4seq-K ----------------------***---------	ERRFI1|ENSG00000116285.13	ENST00000377482.10;ENST00000474874.5	3UTR	895	565	111	31		422	274	82	18
chr1	8014083	8014084	potential G-triplex & G>=40%	-	chr1:8014083-8014143:-	FALSE	5'- TCTTCCACCGTTGCCAATCTCTGAAGCCCTCTCTCTGGATGACACAGACTGTGAGGTGGAATTCCTAACT -3' rG4seq-K -----------------------------------------------------------*----------	ERRFI1|ENSG00000116285.13	ENST00000377482.10;ENST00000467067.1;ENST00000469499.5;ENST00000474874.5;ENST00000487559.1	3UTR;CDS	180	150	38	6		100	82	31	5
chr1	33323673	33323674	two-quartet	-	chr1:33323674-33323694:-	FALSE	5'- GGCAGGGTTGGAAATGAAGGACTTTTTTAA -3' rG4seq-K --------------------*---------	PHC2|ENSG00000134686.20	ENST00000257118.5;ENST00000373418.7;ENST00000373422.8;ENST00000431992.6;ENST00000485928.5;ENST00000683057.1	3UTR	93	81	9	1		44	41	8	2
chr1	36137868	36137869	potential G-quadruplex & G>=40%	-	chr1:36137868-36137928:-	FALSE	5'- CCCAGCTGGTGATGAATTCTCCCTCATTTTGGAAAATAACCCCTTGGTGGACTTTGTGGAACTTCCTGAT -3' rG4seq-K -----------------------------------------------------------*----------	TRAPPC3|ENSG00000054116.12	ENST00000373159.1;ENST00000373162.5;ENST00000373163.5;ENST00000373166.8;ENST00000462715.1;ENST00000469757.1;ENST00000616074.4;ENST00000616395.4;ENST00000617904.4	3UTR;CDS	133	116	34	8		60	47	6	0
chr1	45514962	45514963	potential G-quadruplex & G>=40%	-	chr1:45514962-45515022:-	FALSE	5'- TAACTGTATGTTTGCCTTTTGCCATAGGGTCAATACACCTAAGAAACAAGGAGGACTGGGACCCATGAAC -3' rG4seq-K -----------------------------------------------------------*----------	PRDX1|ENSG00000117450.15	ENST00000262746.5;ENST00000319248.13;ENST00000372079.1;ENST00000424390.2;ENST00000447184.6;ENST00000676549.1	CDS	34	25	11	0		22	22	6	0
chr1	86862811	86862812	potential G-triplex & G>=40%	-	chr1:86862811-86862871:-	FALSE	5'- TAATGAAGACTACACAGAAAACCTTTCTAGGGATTTGTGTGGATCAGATACATACTTGGCAAATTTTTGA -3' rG4seq-K -----------------------------------------------------------*----------	SELENOF|ENSG00000183291.18	ENST00000331835.10;ENST00000370554.5;ENST00000648872.1	3UTR	50	32	16	0		29	23	12	0
chr1	150574806	150574807	potential G-quadruplex & G>=40%	-	chr1:150574806-150574866:-	FALSE	5'- GCTACGTAGTTCGGGCAAATCCTCCAAAAGGGAAAGGGAGGATTTGCTTAGAAGGATGGCGCTCCCAGTG -3' rG4seq-K -----------------------------------------------------------*----------	MCL1|ENSG00000143384.14	ENST00000369026.3;ENST00000464132.2;ENST00000620947.4;ENST00000676522.1;ENST00000678610.1;ENST00000678770.1	3UTR	83	43	19	2		26	20	11	0
chr1	150576449	150576450	potential G-triplex & G>=40%	-	chr1:150576449-150576509:-	FALSE	5'- ATTGATGTGTAACTGTATGCAGACTGGTTGTAGTGGAACAAATCTGATAACTATGCAGGTTTAAATTTTC -3' rG4seq-K -----------------------------------------------------------*----------	MCL1|ENSG00000143384.14	ENST00000369026.3;ENST00000464132.2;ENST00000620947.4;ENST00000676522.1;ENST00000678610.1;ENST00000678770.1	3UTR	193	114	93	8		115	58	52	8
chr1	153534732	153534734	potential G-quadruplex & G>=40%	-	chr1:153534732-153534792:-	FALSE	5'- CTTGGACCGGAACAAGGACCAGGAGGTGAACTTCCAGGAGTATGTCACCTTCCTGGGGGCCTTGGCTTTG -3' rG4seq-K ----------------------------------------------------------**----------	S100A6|ENSG00000197956.10	ENST00000368719.9;ENST00000368720.6;ENST00000462776.2;ENST00000496817.5	CDS	202	64	83	11		80	34	57	7
chr1	153614518	153614519	potential G-quadruplex & G>=40%	-	chr1:153614518-153614578:-	FALSE	5'- GGGAAATGATTTGAATAATGGAGCTGGGAATATGGCTGGATATCTGGTACTAAAAAAGGGTCTTTAAGAA -3' rG4seq-K -----------------------------------------------------------*----------	S100A14|ENSG00000189334.9	ENST00000344616.4;ENST00000368701.5;ENST00000368702.5;ENST00000476873.5	3UTR	169	111	50	4		84	46	28	2
chr1	153974575	153974576	two-quartet	-	chr1:153974576-153974599:-	FALSE	5'- GGTTCTTTGGAGCCTTGTGGTGGAATCCCCTTT -3' rG4seq-K -----------------------*---------	ENSG00000285779|ENSG00000285779.1;JTB|ENSG00000143543.15	ENST00000271843.9;ENST00000356648.5;ENST00000368589.5;ENST00000648921.1	3UTR;non_coding	227	195	16	2		114	102	16	3
chr1	154156589	154156590	potential G-quadruplex & G>=40%	-	chr1:154156589-154156649:-	FALSE	5'- GTTTGTGGCACCCTGGCCACCCCATCTGGCTGTGACAGCCTCTGCAGTCCGTGGGCTGGCAGTTTGTTGA -3' rG4seq-K -----------------------------------------------------------*----------	TPM3|ENSG00000143549.21	ENST00000312970.13;ENST00000330188.13;ENST00000341372.8;ENST00000341485.10;ENST00000368533.8;ENST00000368545.7;ENST00000469717.5;ENST00000611659.4;ENST00000651731.1	3UTR	84	71	9	1		35	33	6	0
chr1	155478659	155478660	two-quartet	-	chr1:155478660-155478681:-	FALSE	5'- GGATTAGGTTACTATGGAAGGTATCCTCCCA -3' rG4seq-K ---------------------*---------	ASH1L|ENSG00000116539.14	ENST00000368346.7;ENST00000392403.8;ENST00000548830.2;ENST00000676814.1;ENST00000677042.1;ENST00000677213.1;ENST00000677825.1;ENST00000678117.1;ENST00000678699.1;ENST00000679097.1;ENST00000679133.1;ENST00000679333.1	3UTR;CDS	87	78	10	2		71	64	10	1
chr1	156009205	156009206	two-quartet	-	chr1:156009206-156009229:-	FALSE	5'- GGGGTCTAGGAGGGGCATTTTGGAGACTGCCTG -3' rG4seq-K -----------------------*---------	SSR2|ENSG00000163479.14	ENST00000295702.9;ENST00000472467.1;ENST00000480176.5;ENST00000484320.6;ENST00000488179.6;ENST00000496742.5;ENST00000529008.5;ENST00000532074.5	3UTR	71	25	20	0		26	17	25	1
chr1	182383989	182383990	potential G-quadruplex & G>=40%	-	chr1:182383989-182384049:-	FALSE	5'- TAGCTGAAAGGGGAAGACCTGACGTACTCTGGTTAGGTTAGGACTTGCCCTCGTGGTGGAAACTTTTCTT -3' rG4seq-K -----------------------------------------------------------*----------	GLUL|ENSG00000135821.19	ENST00000311223.9;ENST00000331872.11;ENST00000339526.8;ENST00000417584.6;ENST00000491322.1;ENST00000642379.1	3UTR	99	83	9	3		48	43	7	2
chr10	3777585	3777587	potential G-triplex & G>=40%	-	chr10:3777585-3777645:-	FALSE	5'- TGAAAACCATAACCTAACTTTTATAGAGGCTTTATCTTTAATTTAACGATGTGCGGAGGACTTTCTTGCT -3' rG4seq-K ----------------------------------------------------------**----------	KLF6|ENSG00000067082.15	ENST00000461124.1;ENST00000497571.6;ENST00000542957.1	3UTR	169	116	35	1		68	50	26	3
chr10	80155658	80155659	potential G-quadruplex & G>=40%	-	chr10:80155658-80155718:-	FALSE	5'- ACCCCTCCTGACCCGTATAGTGTGCCACAGGACCTGGGTCGGTCTAGAACTCTCTCAGGATGCCTTTTCT -3' rG4seq-K -----------------------------------------------------------*----------	ANXA11|ENSG00000122359.18	ENST00000265447.8;ENST00000372231.7;ENST00000422982.8;ENST00000438331.5;ENST00000447489.1;ENST00000463340.1	3UTR	98	46	31	4		56	23	26	0
chr10	96544144	96544145	potential G-quadruplex & G>=40%	-	chr10:96544144-96544204:-	FALSE	5'- AGGAGATGGATAAAGCAGATGTTTATTGGGGCATTCCTTATCCCAGCTATGGTGTGTGGCACTGCCTTCT -3' rG4seq-K -----------------------------------------------------------*----------	TM9SF3|ENSG00000077147.16	ENST00000371142.9;ENST00000490192.1;ENST00000649367.1	CDS	118	91	20	1		67	56	10	1
chr11	205344	205345	two-quartet	-	chr11:205345-205370:-	FALSE	5'- GGCATGGCCGTGGGTCTAATTGTGGCCTTCTTCAT -3' rG4seq-K -------------------------*---------	BET1L|ENSG00000177951.18	ENST00000325147.13;ENST00000332865.10;ENST00000382762.8;ENST00000410108.5;ENST00000486280.1;ENST00000529614.6	3UTR;CDS	75	33	30	0		49	21	17	0
chr11	10799707	10799708	two-quartet	-	chr11:10799707-10799728:-	FALSE	5'- GGAGATTTTGGAAGGAAAGGGACTGAGTTTC -3' rG4seq-K --------------------*----------	EIF4G2|ENSG00000110321.19	ENST00000339995.11;ENST00000396525.7;ENST00000525681.6;ENST00000526148.6;ENST00000528839.1;ENST00000532120.1;ENST00000532383.5;ENST00000534272.1	CDS	72	63	23	2		42	35	13	0
chr11	10808726	10808727	bulges	-	chr11:10808881-10808902:-,chr11:10808727-10808743:-	TRUE	5'- GGAGGTGGCAGCGGGTACCGAGAGGCAGCTGCGGTGGCAGCTGCTGA -3' rG4seq-K -------------------------------------*---------	EIF4G2|ENSG00000110321.19	ENST00000339995.11;ENST00000524932.6;ENST00000525972.5;ENST00000527419.6;ENST00000528562.6;ENST00000530211.6;ENST00000530702.2;ENST00000531507.5;ENST00000532570.6;ENST00000534246.1	5UTR	30	25	8	1		17	14	14	1
chr11	119044933	119044934	potential G-quadruplex & G>=40%	-	chr11:119044933-119044993:-	FALSE	5'- TTCTCTGCCCCTTGCCTAAAAGCCTGTACCTCTGGATTGGCGGAAGTAAATCTGGAAGGATTCTCACTCG -3' rG4seq-K -----------------------------------------------------------*----------	HYOU1|ENSG00000149428.20	ENST00000612687.4;ENST00000614711.4;ENST00000617285.5;ENST00000652093.1	3UTR	106	71	13	2		56	31	12	0
chr11	123059157	123059158	potential G-quadruplex & G>=40%	-	chr11:123059157-123059217:-	FALSE	5'- CAAGATTTGCTGCTCTTGGATGTCACTCCTCTTTCCCTTGGTATTGAAACTGCTGGTGGAGTCATGACTG -3' rG4seq-K -----------------------------------------------------------*----------	HSPA8|ENSG00000109971.14	ENST00000227378.7;ENST00000453788.6;ENST00000524552.5;ENST00000526110.5;ENST00000526862.1;ENST00000532091.1;ENST00000532636.5;ENST00000533238.5;ENST00000533540.5;ENST00000534319.5;ENST00000534624.6	5UTR;CDS	91	74	26	3		44	37	6	1
chr12	92143345	92143346	potential G-triplex & G>=40%	-	chr12:92143345-92143405:-	FALSE	5'- CTAGCTTGTAGTTTTCTAAGACTGAGTAAACTTCTTATTTTTAGAAAGTGGAGGTCTGGTTTGTAACTTT -3' rG4seq-K -----------------------------------------------------------*----------	BTG1|ENSG00000133639.6	ENST00000256015.5;ENST00000673901.1	3UTR	61	56	12	2		44	37	13	2
chr15	41899686	41899687	two-quartet	-	chr15:41899687-41899709:-	FALSE	5'- GGTCTCCTTGGTGGGTGGCAGGATTTAAATTC -3' rG4seq-K ----------------------*---------	EHD4|ENSG00000103966.11	ENST00000220325.9	3UTR	42	39	10	1		17	14	7	0
chr16	71732841	71732842	two-quartet	-	chr16:71732842-71732861:-	FALSE	5'- GGCTGGCTGCTTCTGGAGGCTACTTTGCA -3' rG4seq-K -------------------*---------	AP1G1|ENSG00000166747.13	ENST00000299980.9;ENST00000393512.7;ENST00000564155.5;ENST00000569748.5;ENST00000570052.1	3UTR	167	138	16	1		73	62	14	2
chr17	40818230	40818231	potential G-quadruplex & G>=40%	-	chr17:40818230-40818290:-	FALSE	5'- GTCTTGATGGTCTATGGAAATAGACCTTGAAAATAAGGTGTCTACAAGGTGTTTTGTGGTTTCTGTATTT -3' rG4seq-K -----------------------------------------------------------*----------	KRT10|ENSG00000186395.9	ENST00000269576.6;ENST00000635956.2	3UTR	171	103	43	3		74	47	31	7
chr17	42810725	42810726	potential G-triplex & G>=40%	-	chr17:42810725-42810785:-	FALSE	5'- TGTCCTCACAATTTTATAACAAATGACTTTTTTCCTTAGGGGGAGGTTTGCCTTAAAGGCTTTTAATTTT -3' rG4seq-K -----------------------------------------------------------*----------	BECN1|ENSG00000126581.13	ENST00000361523.8;ENST00000438274.7;ENST00000543382.6;ENST00000587880.1;ENST00000588276.5;ENST00000589663.5;ENST00000590099.6;ENST00000590185.1;ENST00000590764.1;ENST00000617806.4	3UTR;CDS	40	25	12	0		28	26	6	0
chr17	49701365	49701366	two-quartet	-	chr17:49701365-49701393:-	FALSE	5'- GGGAAAATGGACTTAATAGGAATATGGGACTGAGTTCC -3' rG4seq-K ---------------------------*----------	SLC35B1|ENSG00000121073.15	ENST00000240333.12;ENST00000502406.5;ENST00000504260.5;ENST00000507477.1;ENST00000507773.6;ENST00000508749.1;ENST00000649906.1	3UTR	30	20	12	1		17	15	9	0
chr17	50382928	50382929	two-quartet	-	chr17:50382928-50382954:-	FALSE	5'- GGAGTTTGGATTCCTATGGAATTGGGTTCTGCTGGA -3' rG4seq-K -------------------------*----------	LRRC59|ENSG00000108829.10	ENST00000225972.8;ENST00000503118.2	3UTR	61	51	15	2		29	26	8	0
chr17	76734901	76734902	potential G-quadruplex & G>=40%	-	chr17:76734901-76734961:-	FALSE	5'- CTTGTAATTTAGTGAGGTGAACGACTTCAGATTTCATTATTGGATTTGGATATTTGAGGTAAAATTTCAT -3' rG4seq-K -----------------------------------------------------------*----------	SRSF2|ENSG00000161547.17	ENST00000359995.10;ENST00000392485.2;ENST00000452355.7;ENST00000508921.7;ENST00000582449.5;ENST00000585202.5;ENST00000586778.1;ENST00000589919.1	3UTR	195	160	31	2		89	80	13	3
chr17	78971392	78971393	two-quartet	-	chr17:78971393-78971420:-	FALSE	5'- GGAAGGCTTCCACTAGGGTCCACCAGGAGTTCTCCCA -3' rG4seq-K ---------------------------*---------	LGALS3BP|ENSG00000108679.13	ENST00000262776.8;ENST00000586720.5;ENST00000587251.5;ENST00000587311.5;ENST00000591778.5	3UTR	44	31	6	0		23	20	10	1
chr17	81511091	81511092	potential G-quadruplex & G>=40%	-	chr17:81511091-81511151:-	FALSE	5'- CCTCGGTGACACAGCATCACTAAGGGAGGGCTCTGTCCCCTAGGTATGGAATCTTGCGGCATCCACGAGA -3' rG4seq-K -----------------------------------------------------------*----------	ACTG1|ENSG00000184009.13	ENST00000570382.2;ENST00000571691.6;ENST00000571721.6;ENST00000572105.7;ENST00000573283.7;ENST00000574671.6;ENST00000575087.5;ENST00000575659.6;ENST00000575842.5;ENST00000575994.6;ENST00000576209.5;ENST00000576214.3;ENST00000576544.6;ENST00000576917.5;ENST00000615544.5;ENST00000644774.2;ENST00000679410.1;ENST00000679480.1;ENST00000679535.1;ENST00000679778.1;ENST00000680227.1;ENST00000680727.1;ENS…	3UTR;CDS	204	128	69	7		106	71	42	1
chr17	81511439	81511440	two-quartet	-	chr17:81511439-81511456:-	FALSE	5'- GGACCTGGCTGGCCGGGACCTGACCGA -3' rG4seq-K ----------------*----------	ACTG1|ENSG00000184009.13	ENST00000570382.2;ENST00000571691.6;ENST00000571721.6;ENST00000572105.7;ENST00000573283.7;ENST00000574671.6;ENST00000575087.5;ENST00000575659.6;ENST00000575842.5;ENST00000575994.6;ENST00000576209.5;ENST00000576214.3;ENST00000576544.6;ENST00000576917.5;ENST00000615544.5;ENST00000644774.2;ENST00000679410.1;ENST00000679480.1;ENST00000679535.1;ENST00000679778.1;ENST00000680227.1;ENST00000680727.1;ENS…	3UTR;CDS	239	210	43	2		130	112	25	0
chr17	81843779	81843780	potential G-quadruplex & G>=40%	-	chr17:81843779-81843839:-	FALSE	5'- TTCCTTCTGCTTTTCGGTTTTTGGAAAGGGATCCATCTCCAGGCAGCCCACCCTGGTGGGGCTTGTTTCC -3' rG4seq-K -----------------------------------------------------------*----------	P4HB|ENSG00000185624.16	ENST00000331483.9;ENST00000415593.6;ENST00000439918.7;ENST00000466567.3;ENST00000472244.6;ENST00000473021.2;ENST00000474712.2;ENST00000476482.2;ENST00000477607.7;ENST00000484286.2;ENST00000570907.6;ENST00000571507.6;ENST00000571617.2;ENST00000574914.2;ENST00000575069.6;ENST00000576390.6;ENST00000679366.1;ENST00000679396.1;ENST00000679439.1;ENST00000679455.1;ENST00000679470.1;ENST00000679628.1;ENS…	3UTR	71	42	25	0		34	21	21	0
chr18	35992371	35992372	two-quartet	-	chr18:35992372-35992396:-	FALSE	5'- GGACAACTTTGGTTCTGGAACTGGTTTCTATTTG -3' rG4seq-K ------------------------*---------	RPRD1A|ENSG00000141425.18	ENST00000357384.8;ENST00000399022.9;ENST00000585879.1;ENST00000587563.5;ENST00000590898.5	3UTR	56	46	11	1		37	33	7	0
chr19	3976290	3976291	canonical/G3L1-7	-	chr19:3976290-3976312:-	FALSE	5'- GGGGAGGGGGAGGCGGGATGGGACACCCAACA -3' rG4seq-K ---------------------*----------	EEF2|ENSG00000167658.16	ENST00000309311.7;ENST00000600794.1	3UTR;CDS	519	244	144	27		254	120	81	12
chr2	20037422	20037423	potential G-triplex & G>=40%	-	chr2:20037422-20037482:-	FALSE	5'- TTCCTATATGTGATACAATGTTATGGTTGTTATTTTTTCTCCAGTATCAAGTGGGTTGGCTGATTCCATT -3' rG4seq-K -----------------------------------------------------------*----------	LAPTM4A|ENSG00000068697.7	ENST00000175091.5	CDS	86	76	15	2		48	40	8	0
chr2	38744920	38744921	potential G-triplex & G>=40%	-	chr2:38744920-38744980:-	FALSE	5'- TATAAATTTTGTTGAATGTATTAACATCATATGGTCTGAAAATGTGGGTTTTTATTTGGCACATTTAAAT -3' rG4seq-K -----------------------------------------------------------*----------	SRSF7|ENSG00000115875.19	ENST00000313117.11;ENST00000409276.5;ENST00000425778.5;ENST00000425941.6;ENST00000431066.5;ENST00000432873.5;ENST00000443213.5;ENST00000446327.6;ENST00000452806.5;ENST00000477635.5	3UTR	160	111	71	3		103	71	42	1
chr2	69323009	69323010	potential G-triplex & G>=40%	-	chr2:69323009-69323069:-	FALSE	5'- TTATAACTATGTCAACAAGTGTTTATTAATACCTATTATGGGAAAGTCACTGTGGTTGGCATTGAAAATT -3' rG4seq-K -----------------------------------------------------------*----------	GFPT1|ENSG00000198380.13	ENST00000357308.9;ENST00000361060.5;ENST00000674507.1	3UTR	44	39	7	0		28	24	8	0
chr2	69325962	69325963	potential G-quadruplex & G>=40%	-	chr2:69325962-69326022:-	FALSE	5'- TACCTCTTACATTTTCCCAGTAATTTGTGGAGGACTTTGAATAATGGAATCTATATTGGAATCTGTATCA -3' rG4seq-K -----------------------------------------------------------*----------	GFPT1|ENSG00000198380.13	ENST00000357308.9;ENST00000361060.5;ENST00000674438.1;ENST00000674507.1	3UTR	42	26	18	2		29	21	12	0
chr2	241247137	241247138	two-quartet	-	chr2:241248002-241248015:-,chr2:241247138-241247142:-	TRUE	5'- GGTGGCAGATCTGGTGGAAAATAGCTA -3' rG4seq-K -----------------*---------	HDLBP|ENSG00000115677.18	ENST00000310931.10;ENST00000373292.8;ENST00000391975.5;ENST00000391976.6;ENST00000427183.6;ENST00000452931.1;ENST00000460826.1;ENST00000487169.5;ENST00000488923.1	CDS	153	122	16	6		83	68	19	2
chr20	483701	483702	potential G-quadruplex & G>=40%	-	chr20:483701-483761:-	FALSE	5'- AACTTTTCATAACTCAGGGGATTCCCTGAAAAATTACCTGCAGGTGGAATATTTCATGGACAAATTTTTT -3' rG4seq-K -----------------------------------------------------------*----------	CSNK2A1|ENSG00000101266.19	ENST00000217244.9;ENST00000349736.10;ENST00000400227.8;ENST00000619801.5;ENST00000642673.1;ENST00000642689.1;ENST00000643641.1;ENST00000643660.1;ENST00000643700.1;ENST00000643980.1;ENST00000644003.1;ENST00000644170.1;ENST00000644448.1;ENST00000644710.1;ENST00000644885.1;ENST00000645234.1;ENST00000645249.1;ENST00000645260.1;ENST00000645334.1;ENST00000645623.1;ENST00000645768.1;ENST00000645840.1;EN…	3UTR	70	36	29	4		43	24	19	1
chr20	647301	647302	two-quartet	-	chr20:647302-647327:-	FALSE	5'- GGATGGGTATTTATTTGGATAAAGGTATTTCCCTC -3' rG4seq-K -------------------------*---------	ENSG00000270299|ENSG00000270299.1;SRXN1|ENSG00000271303.2	ENST00000381962.4;ENST00000488788.2	3UTR	421	370	100	10		238	212	48	6
chr22	28795217	28795218	potential G-triplex & G>=40%	-	chr22:28795217-28795277:-	FALSE	5'- TTCCCTTTCCCCATTCAGTGACATGTCCTCTCTGCTTGGTGTAAACCATTCTTGGGAGGACACTTTTGCC -3' rG4seq-K -----------------------------------------------------------*----------	XBP1|ENSG00000100219.17	ENST00000216037.10;ENST00000344347.5;ENST00000403532.7;ENST00000405219.7;ENST00000484256.1	3UTR;CDS	101	58	32	3		57	38	28	1
chr22	38483711	38483713	potential G-quadruplex & G>=40%	-	chr22:38483711-38483771:-	FALSE	5'- ATTGCATTCATGGTTGAAACTCAACTTAGGGAAAGGGTTCCAATGTATTAAGCAATGGGCTGCTTCTCCC -3' rG4seq-K ----------------------------------------------------------**----------	DDX17|ENSG00000100201.23	ENST00000396821.8;ENST00000403230.3	3UTR	161	62	68	5		83	29	59	2
chr22	38484744	38484745	potential G-quadruplex & G>=40%	-	chr22:38484744-38484804:-	FALSE	5'- GGCATCCTTTTGCACTCAGCTTATTACAGGTAGGTAGTGCTTAAGAAAAGTCATGGAGGACTAAAGCCTA -3' rG4seq-K -----------------------------------------------------------*----------	DDX17|ENSG00000100201.23	ENST00000396821.8;ENST00000403230.3	3UTR	60	50	13	3		37	35	12	4
chr3	57572101	57572102	potential G-quadruplex & G>=40%	-	chr3:57572101-57572161:-	FALSE	5'- TTGTTACAACAAAATTAGTTTGTATCTTGGTTATTAAACAGTATCTGGGACTGGTTTGGGCAGAATATTA -3' rG4seq-K -----------------------------------------------------------*----------	ARF4|ENSG00000168374.11	ENST00000303436.11;ENST00000486310.5;ENST00000489843.1;ENST00000496292.5	3UTR	53	45	13	2		43	35	10	1
chr3	119447075	119447076	potential G-quadruplex & G>=40%	-	chr3:119447075-119447135:-	FALSE	5'- TGGTTCTGATATCAGCTCGCTTGGTACTACTCACTTTGTGTGGATGGGTACTTTGTTGGACCCTCGTCAA -3' rG4seq-K -----------------------------------------------------------*----------	TMEM39A|ENSG00000176142.13	ENST00000319172.10;ENST00000438581.6;ENST00000468676.5;ENST00000486159.5;ENST00000486235.5;ENST00000490099.5;ENST00000491685.5	3UTR;CDS	69	59	15	1		30	24	6	0
chr3	149371716	149371717	potential G-quadruplex & G>=40%	-	chr3:149371716-149371776:-	FALSE	5'- CTTGGTGGAATTGAATTCATCTTGTGTCTTATTCAAGTAATAAATGGAGTGCTTGGAGGCATATGTGGCT -3' rG4seq-K -----------------------------------------------------------*----------	TM4SF1|ENSG00000169908.12	ENST00000305366.8;ENST00000472441.1;ENST00000493298.1;ENST00000493348.1	3UTR;CDS	72	65	7	0		27	27	6	0
chr3	149371767	149371768	potential G-quadruplex & G>=40%	-	chr3:149371767-149371827:-	FALSE	5'- CCCAAGCACATTGTGGAATGGAATGTATCTCTGTTTTCTATCCTCTTGGCTCTTGGTGGAATTGAATTCA -3' rG4seq-K -----------------------------------------------------------*----------	TM4SF1|ENSG00000169908.12	ENST00000305366.8;ENST00000472441.1;ENST00000493298.1;ENST00000493348.1	3UTR;CDS	147	121	33	8		75	62	17	4
chr3	170866371	170866372	two-quartet	-	chr3:170866372-170866389:-	FALSE	5'- GGAGGACTAGGCAAAGGCTCCCCTTAC -3' rG4seq-K -----------------*---------	RPL22L1|ENSG00000163584.18	ENST00000295830.13;ENST00000463836.1;ENST00000466674.5;ENST00000475836.5;ENST00000478578.1;ENST00000494771.5	3UTR;CDS	116	58	36	2		63	26	25	0
chr4	39499450	39499451	potential G-quadruplex & G>=40%	-	chr4:39499450-39499510:-	FALSE	5'- CCACACTTTAATATCACATTATAAAGGGAAGGACAGTCTTCATTCCTCCTGGTTATTGGTTTGTTTGTCA -3' rG4seq-K -----------------------------------------------------------*----------	UGDH|ENSG00000109814.12	ENST00000316423.11;ENST00000501493.6;ENST00000506179.5	3UTR	69	45	28	2		36	28	14	1
chr4	75644641	75644642	potential G-triplex & G>=40%	-	chr4:75644641-75644701:-	FALSE	5'- TTAGTAGCTCCATATCTAAGATTTTTCTACCTGCCCCTCTTCAGTACAGGGATGGCTGGCTGCTCAACAC -3' rG4seq-K -----------------------------------------------------------*----------	G3BP2|ENSG00000138757.15	ENST00000357854.7;ENST00000359707.9;ENST00000395719.7;ENST00000676470.1;ENST00000676584.1;ENST00000676666.1;ENST00000676839.1;ENST00000676974.1;ENST00000677003.1;ENST00000677060.1;ENST00000677125.1;ENST00000677171.1;ENST00000677192.1;ENST00000677201.1;ENST00000677265.1;ENST00000677333.1;ENST00000677583.1;ENST00000677606.1;ENST00000677620.1;ENST00000677727.1;ENST00000677794.1;ENST00000677876.1;ENS…	3UTR	64	44	10	1		44	34	13	1
chr4	186595813	186595814	potential G-triplex & G>=40%	-	chr4:186595813-186595873:-	FALSE	5'- AAACCGTCTTGGCCCATATACTTACTGTTTGTCATCCTTCCTTTTAGCAAAAGTGGTGGATCTTGATCCC -3' rG4seq-K -----------------------------------------------------------*----------	FAT1|ENSG00000083857.15	ENST00000441802.7;ENST00000500085.2;ENST00000507105.1;ENST00000512772.5	CDS	79	62	22	3		41	29	12	0
chr4	186619010	186619011	two-quartet	-	chr4:186619011-186619035:-	FALSE	5'- GGATGGGGATTCTGGTATTTATGGTCACGTTACT -3' rG4seq-K ------------------------*---------	FAT1|ENSG00000083857.15	ENST00000441802.7	CDS	173	64	63	5		82	36	28	1
chr5	43294099	43294100	potential G-quadruplex & G>=40%	-	chr5:43294099-43294159:-	FALSE	5'- CTCACCTCAGCAATTAGCAGGGAAGAGAATTGGAGTGTTTTCTTATGGTTCTGGTTTGGCTGCCACTCTG -3' rG4seq-K -----------------------------------------------------------*----------	HMGCS1|ENSG00000112972.15	ENST00000325110.11;ENST00000433297.2;ENST00000508319.1	CDS	155	67	44	3		80	40	30	0
chr5	115616000	115616001	potential G-quadruplex & G>=40%	-	chr5:115616000-115616060:-	FALSE	5'- TGTGGAAAGGACACCTTTTTTTATTTGTAAAGGTGGAAAAACTTTGGAACTCATTTTGGGCTATTCATGT -3' rG4seq-K -----------------------------------------------------------*----------	TMED7-TICAM2|ENSG00000251201.8;TMED7|ENSG00000134970.14	ENST00000282382.8;ENST00000333314.3;ENST00000456936.4;ENST00000514548.1	3UTR;non_coding	69	43	10	1		35	26	14	2
chr6	2833431	2833432	potential G-quadruplex & G>=40%	-	chr6:2833431-2833491:-	FALSE	5'- TTCATTTTCTTTGTAAGTTTGGCTCTGTTGGCTGTTTACACCCATGAATTTTGGCATGGGTATCTATTTT -3' rG4seq-K -----------------------------------------------------------*----------	SERPINB1|ENSG00000021355.13	ENST00000380739.6	3UTR	79	60	14	1		32	25	22	0
chr6	31534837	31534838	two-quartet	-	chr6:31534838-31534855:-	FALSE	5'- GGGGTGGGGGCCTTTGGCACCTCAATC -3' rG4seq-K -----------------*---------	ATP6V1G2-DDX39B|ENSG00000254870.5;DDX39B|ENSG00000198563.14	ENST00000376177.6;ENST00000376185.5;ENST00000396172.6;ENST00000427214.5;ENST00000431908.5;ENST00000458640.5;ENST00000462256.5;ENST00000481456.1;ENST00000482195.5;ENST00000484566.5	non_coding	144	104	25	3		87	63	13	0
chr6	31535069	31535070	two-quartet	-	chr6:31535070-31535083:-	FALSE	5'- GGGGGAGGGCAGGATTTTTCTGC -3' rG4seq-K -------------*---------	ATP6V1G2-DDX39B|ENSG00000254870.5;DDX39B|ENSG00000198563.14	ENST00000376177.6;ENST00000376185.5;ENST00000396172.6;ENST00000427214.5;ENST00000431908.5;ENST00000458640.5;ENST00000462256.5;ENST00000481456.1;ENST00000482195.5;ENST00000484566.5	non_coding	317	301	11	6		150	140	13	6
chr6	36968407	36968408	two-quartet	-	chr6:36968408-36968436:-	FALSE	5'- GGCCTATGCTAGGAGGCAAATGGCCAGGCTCTGCCTGT -3' rG4seq-K ----------------------------*---------	MTCH1|ENSG00000137409.20	ENST00000373616.9;ENST00000373627.10	3UTR	66	44	12	2		31	23	8	0
chr6	43620795	43620797	potential G-quadruplex & G>=40%	-	chr6:43620795-43620855:-	FALSE	5'- CTCTGCGGTCATGTTGGCTTTCATGCTGGATCAAATGTTTTACTTTCCCAGACTGGTGGCATCTGAGTTC -3' rG4seq-K ----------------------------------------------------------**----------	GTPBP2|ENSG00000172432.19	ENST00000307114.11;ENST00000307126.10;ENST00000419497.5;ENST00000432918.5;ENST00000476510.5;ENST00000496137.5	3UTR	34	19	16	0		26	15	20	2
chr6	47231771	47231772	two-quartet	-	chr6:47231771-47231789:-	FALSE	5'- GGCCTTGGTCCTGGTGGGATTCCTTCAC -3' rG4seq-K -----------------*----------	TNFRSF21|ENSG00000146072.6	ENST00000296861.2	3UTR	159	145	15	5		71	59	6	0
chr6	82170582	82170583	potential G-quadruplex & G>=40%	-	chr6:82170582-82170642:-	FALSE	5'- TTCTGAAAATAAATGCTTAATTACATATACAGGAATTAAATAGTTTGGAAGAGGGTTGGATTATCATTAC -3' rG4seq-K -----------------------------------------------------------*----------	IBTK|ENSG00000005700.15	ENST00000306270.12;ENST00000445419.6;ENST00000505222.5;ENST00000508381.1;ENST00000610980.4	3UTR	192	171	16	6		111	100	16	7
chr6	109367145	109367146	potential G-quadruplex & G>=40%	-	chr6:109367145-109367205:-	FALSE	5'- TTTCAAGTGCCTTAATTGTTTAAAATCTCTGGCTTCAAAGTTTCTTGGGGAAAGGTCGGTTTACCTCACA -3' rG4seq-K -----------------------------------------------------------*----------	CD164|ENSG00000135535.17	ENST00000275080.11;ENST00000310786.10;ENST00000324953.9;ENST00000413644.6;ENST00000415861.2;ENST00000504373.2	3UTR	98	85	35	11		67	56	19	6
chr7	6466122	6466123	potential G-quadruplex & G>=40%	-	chr7:6466122-6466182:-	FALSE	5'- AACTGGATCTGGCGCTTCTACTTTGAGGGCTTCTTTGACCTCATTGCTGTGGTGGCCGGCGTAGTCCAGA -3' rG4seq-K -----------------------------------------------------------*----------	DAGLB|ENSG00000164535.15;KDELR2|ENSG00000136240.10	ENST00000258739.9;ENST00000436575.5;ENST00000454368.2;ENST00000463747.1;ENST00000490996.1	CDS;non_coding	95	84	8	1		52	46	8	1
chr7	56101644	56101646	potential G-quadruplex & G>=40%	-	chr7:56101644-56101704:-	FALSE	5'- AATGGAAGTGGGGGTGTCCCTACTCTGTAGAATCTGGGACTGGGCAAATGTTTGTGTGGCCTCCTTAAAC -3' rG4seq-K ----------------------------------------------------------**----------	CHCHD2|ENSG00000106153.13	ENST00000395422.4	3UTR	71	40	14	1		52	27	12	0
chr7	73570382	73570383	potential G-quadruplex & G>=40%	-	chr7:73570382-73570442:-	FALSE	5'- CATCTTTCCTCCCAGGTGGAAGCCTTTCAGAAGGAGTCTCCTGGTTTTCTTACTGGTGGCCCTGCTTCTT -3' rG4seq-K -----------------------------------------------------------*----------	TBL2|ENSG00000106638.18	ENST00000305632.11;ENST00000417008.5;ENST00000424598.5;ENST00000432538.5;ENST00000433464.5;ENST00000450285.5;ENST00000459913.5	3UTR	57	42	9	0		21	17	7	0
chr7	121350084	121350085	two-quartet	-	chr7:121350085-121350109:-	FALSE	5'- GGAATAATAGGGATTTTAGGGTGGATACTTTATT -3' rG4seq-K ------------------------*---------	FAM3C|ENSG00000196937.11	ENST00000359943.8	3UTR	222	188	23	5		130	110	11	4
chr7	149003934	149003936	potential G-quadruplex & G>=40%	-	chr7:149003934-149003994:-	FALSE	5'- ATCGCCAAGATGGACGCCACTGCCAACGACGTCCCCAGCGACCGCTATAAGGTGGAGGGCTTCCCCACCA -3' rG4seq-K ----------------------------------------------------------**----------	PDIA4|ENSG00000155660.11	ENST00000286091.9;ENST00000652332.1	CDS	162	45	61	3		53	23	62	4
chr7	149004136	149004137	two-quartet	-	chr7:149004136-149004159:-	FALSE	5'- GGACCCGTCAAGGTCGTGGTGGGAAAGACCTTT -3' rG4seq-K ----------------------*----------	PDIA4|ENSG00000155660.11	ENST00000286091.9;ENST00000652332.1	CDS	67	58	6	1		21	18	6	0
chr8	123030648	123030649	potential G-quadruplex & G>=40%	-	chr8:123030648-123030708:-	FALSE	5'- GCCAATCACTGCCACCTTTTATTTCCCTGTGGGTCCAGGAACTGGATTTCTTTATTTGGTCAATTTATAT -3' rG4seq-K -----------------------------------------------------------*----------	DERL1|ENSG00000136986.10	ENST00000259512.9;ENST00000405944.7;ENST00000419562.6;ENST00000524119.1	CDS	93	63	17	0		45	28	12	0
chr8	143917068	143917071	potential G-quadruplex & G>=40%	-	chr8:143917068-143917128:-	FALSE	5'- GTTCGCCGACATGCTCTCGGGCAACGCCGGTGGTTTCCGCTCCCGTTCCTCCTCGGTGGGATCCTCCTCC -3' rG4seq-K ---------------------------------------------------------***----------	PLEC|ENSG00000178209.17	ENST00000322810.8;ENST00000345136.8;ENST00000354589.7;ENST00000354958.6;ENST00000356346.7;ENST00000357649.6;ENST00000398774.6;ENST00000436759.6;ENST00000527096.5;ENST00000527303.2;ENST00000528025.6;ENST00000685198.1;ENST00000687971.1;ENST00000693060.1	CDS	120	39	56	3		68	25	40	2
chr9	83968860	83968861	potential G-quadruplex & G>=40%	-	chr9:83968860-83968920:-	FALSE	5'- TTAGTGAACCTATTTTTGGTGGTCATTTTTTTTTTAAGACAGTCATTTTAAAATGGTGGCTGAATTTCCC -3' rG4seq-K -----------------------------------------------------------*----------	HNRNPK|ENSG00000165119.21	ENST00000351839.7;ENST00000360384.9;ENST00000376263.8;ENST00000376281.8	3UTR	147	129	16	3		93	83	24	3
chr9	83969100	83969101	potential G-triplex & G>=40%	-	chr9:83969100-83969160:-	FALSE	5'- ATTGAAATTTTGAAACAGCAGCAGAGTGAGTGGATTTTATTTTTCGTTATTGTTGGTGGTTTAAAAAATT -3' rG4seq-K -----------------------------------------------------------*----------	HNRNPK|ENSG00000165119.21	ENST00000351839.7;ENST00000360384.9;ENST00000376263.8;ENST00000376281.8	3UTR	188	128	52	15		113	70	32	8
chrM	5843	5845	potential G-quadruplex & G>=40%	-	chrM:5843-5903:-	FALSE	5'- CAGTGGGGGTGAGGTAAAATGGCTGAGTGAAGCATTGGACTGTAAATCTAAAGACAGGGGTTAGGCCTCT -3' rG4seq-K ----------------------------------------------------------**----------	MT-TY|ENSG00000210144.1	ENST00000387409.1	non_coding	3374	695	2231	144		1681	286	1423	103
chrM	14518	14519	two-quartet	-	chrM:14518-14535:-	FALSE	5'- GGGGGAGGTTATATGGGTTTAATAGTT -3' rG4seq-K ----------------*----------	MT-ND6|ENSG00000198695.2	ENST00000361681.2	CDS	137	114	16	3		70	55	12	0
