# Supplementary material
Source: HighWire-hosted journal article supplement (doi:10.1101/rna.080321.124)
Supplement: Supplemental_Table_S5.xlsx [file Supplemental_Table_S5.xlsx]

## Sheet: phendc3_DP-K-rep1.bootstrap_00.
In vivo phenDC3											Biological rep1					Biological rep2
chromosome	start	end	rG4_structural_class	strand	rG4_intervals	splicing	sequence_diagram	gene_names	coding_regions	transcript_ids	BR1_K+ coverage	BR1_K+ stop	BR1_Li+ coverage	BR1_Li+ stop		BR2_K+ coverage	BR2_K+ stop	BR2_Li+ coverage	BR2_Li+ stop
chr1	46316719	46316720	two-quartet	+	chr1:46316701-46316719:+	FALSE	5'- GGGTTTGGCTTAGGCTGGTAGCTTCTAT -3' rG4seq-K ------------------*---------	UQCRH|ENSG00000173660.12	ENST00000311672.10;ENST00000460947.1;ENST00000489056.5;ENST00000496387.5	3UTR	37	10	19	1		21	4	22	0
chr1	85583618	85583619	bulges	+	chr1:85583591-85583618:+	FALSE	5'- GGGGAGGGAGGGGAAATGTAATACTGGAATAATTTGT -3' rG4seq-K ---------------------------*---------	CCN1|ENSG00000142871.18	ENST00000451137.7;ENST00000674743.1;ENST00000674818.1;ENST00000675083.1;ENST00000676007.1	3UTR	50	13	35	5		36	8	40	3
chr1	201970165	201970166	potential G-triplex & G>=40%	+	chr1:201970106-201970166:+	FALSE	5'- AATGTTTATAGTTTACTTTGAAAGTAAAATATACTATGTCTTGGTTTTGAGGATATTGGATACAAAACTC -3' rG4seq-K -----------------------------------------------------------*----------	TIMM17A|ENSG00000134375.11	ENST00000367287.5;ENST00000482943.1	3UTR	83	6	65	0		64	7	69	2
chr11	8685819	8685820	potential G-quadruplex & G>=40%	+	chr11:8685760-8685820:+	FALSE	5'- GGAGAAGATTAAGAGTGTTGGGGGGGCCTGTGTCCTGGTGGCTTGAAGCCACATGGAGGGAGTTTCATTA -3' rG4seq-K -----------------------------------------------------------*----------	RPL27A|ENSG00000166441.13	ENST00000314138.11;ENST00000524496.5;ENST00000525981.1;ENST00000526562.5;ENST00000530022.5;ENST00000530913.1;ENST00000532359.5;ENST00000534599.5	3UTR;CDS	98	17	87	7		59	10	68	2
chr11	65501244	65501247	two-quartet	+	chr11:65501235-65501246:+	FALSE	5'- GGGGGTGGGGGCAAAATATGT -3' rG4seq-K ---------***---------	MALAT1|ENSG00000251562.9	ENST00000534336.1;ENST00000619449.2	non_coding	395	141	270	67		297	100	252	48
chr11	65501559	65501560	bulges	+	chr11:65501527-65501561:+	FALSE	5'- GGATGGTCTTAACAGGGAAGAGAGAGGGTGGGGGAGAAAATGTT -3' rG4seq-K --------------------------------*-----------	MALAT1|ENSG00000251562.9	ENST00000534336.1;ENST00000619449.2	non_coding	112	36	92	5		73	20	93	5
chr11	65502613	65502615	longloop	+	chr11:65502587-65502615:+	FALSE	5'- GGGTGGGCTTTTGTTGATGAGGGAGGGGAAACTTTTTT -3' rG4seq-K --------------------------**----------	MALAT1|ENSG00000251562.9	ENST00000508832.2;ENST00000534336.1;ENST00000616527.4;ENST00000619449.2	non_coding	381	67	396	24		234	34	357	17
chr11	65503706	65503709	potential G-triplex & G>=40%	+	chr11:65503649-65503709:+	FALSE	5'- CCTTATTTAAATAAAATAGTGTTTGTCTGTAGTTCAGTGTTGGGGCAATCTTGGGGGGGATTCTTCTCTA -3' rG4seq-K ---------------------------------------------------------***----------	MALAT1|ENSG00000251562.9	ENST00000534336.1;ENST00000612781.1;ENST00000616527.4;ENST00000618925.1;ENST00000619449.2;ENST00000620465.4	non_coding	1010	106	974	76		795	94	1050	75
chr11	65503804	65503805	potential G-quadruplex & G>=40%	+	chr11:65503745-65503805:+	FALSE	5'- ACTCTTTAATGGACCAGATCAGGATTTGAGCGGAAGAACGAATGTAACTTTAAGGCAGGAAAGACAAATT -3' rG4seq-K -----------------------------------------------------------*----------	MALAT1|ENSG00000251562.9	ENST00000534336.1;ENST00000612781.1;ENST00000616527.4;ENST00000618925.1;ENST00000619449.2;ENST00000620465.4	non_coding	203	14	169	6		126	10	204	6
chr11	65504291	65504293	canonical/G3L1-7	+	chr11:65504271-65504293:+	FALSE	5'- GGGATGGGAGGAGGGGGTGGGGCTTACTTGTT -3' rG4seq-K --------------------**----------	MALAT1|ENSG00000251562.9	ENST00000534336.1;ENST00000612781.1;ENST00000616527.4;ENST00000618132.1;ENST00000619449.2;ENST00000620465.4	non_coding	466	131	299	48		428	135	347	72
chr11	65504630	65504633	two-quartet	+	chr11:65504619-65504633:+	FALSE	5'- GGTGGTGGGAGGGGACTGAAGCCT -3' rG4seq-K -----------***----------	MALAT1|ENSG00000251562.9	ENST00000534336.1;ENST00000610851.1;ENST00000612781.1;ENST00000613376.1;ENST00000618132.1;ENST00000619449.2	non_coding	462	61	368	22		252	52	419	16
chr11	65505157	65505158	bulges	+	chr11:65505131-65505160:+	FALSE	5'- GGCGTGGGGGTGGAGGGGTGAGGTGGGCGCTAAGCCTTT -3' rG4seq-K --------------------------*------------	MALAT1|ENSG00000251562.9	ENST00000534336.1;ENST00000610851.1;ENST00000618227.1;ENST00000619449.2	non_coding	170	21	140	2		125	26	124	16
chr11	65505485	65505487	canonical/G3L1-7	+	chr11:65505462-65505486:+	FALSE	5'- GGGGAGGGAAAGGGGGAAAGCGGGCAACCACTTT -3' rG4seq-K -----------------------**---------	MALAT1|ENSG00000251562.9	ENST00000534336.1;ENST00000610851.1;ENST00000616691.1;ENST00000617489.1;ENST00000618227.1;ENST00000619449.2	non_coding	642	130	416	42		391	78	428	38
chr11	65505918	65505920	bulges	+	chr11:65505894-65505919:+	FALSE	5'- GTGGCTGAGAGGGCTTTTGGGTGGGAATGCAAAAA -3' rG4seq-K ------------------------**---------	MALAT1|ENSG00000251562.9	ENST00000534336.1;ENST00000610851.1;ENST00000616691.1;ENST00000617489.1;ENST00000618227.1;ENST00000619449.2	non_coding	242	45	220	15		204	40	210	13
chr12	103947698	103947699	potential G-triplex & G>=40%	+	chr12:103947639-103947699:+	FALSE	5'- CAGCTGAAAAAGATGAATTGTAAATTATACTCTCACCATTTGGATCCTGTGTGGAGAGGGAATGTGAAAT -3' rG4seq-K -----------------------------------------------------------*----------	HSP90B1|ENSG00000166598.16	ENST00000299767.10;ENST00000548462.5;ENST00000550595.2;ENST00000552051.2;ENST00000614327.2;ENST00000679538.1;ENST00000679779.1;ENST00000679861.1;ENST00000680281.1;ENST00000680316.1;ENST00000680370.1;ENST00000680391.1;ENST00000680478.1;ENST00000680653.1;ENST00000680663.1;ENST00000680899.1;ENST00000680989.1;ENST00000681172.1;ENST00000681174.1;ENST00000681245.1;ENST00000681698.1;ENST00000681704.1;EN…	3UTR;CDS	369	34	334	16		252	25	268	11
chr12	103947811	103947812	bulges	+	chr12:103947783-103947811:+	FALSE	5'- GGGATTATGGGTCACAGGAAAAAGTGGGTTTTTTAGTT -3' rG4seq-K ----------------------------*---------	HSP90B1|ENSG00000166598.16	ENST00000299767.10;ENST00000548462.5;ENST00000550595.2;ENST00000614327.2;ENST00000679538.1;ENST00000679779.1;ENST00000679861.1;ENST00000680281.1;ENST00000680316.1;ENST00000680370.1;ENST00000680391.1;ENST00000680478.1;ENST00000680653.1;ENST00000680663.1;ENST00000680899.1;ENST00000680989.1;ENST00000681172.1;ENST00000681174.1;ENST00000681245.1;ENST00000681698.1;ENST00000681704.1;ENST00000681910.1;EN…	3UTR	483	72	398	31		311	44	367	24
chr12	104349505	104349506	potential G-quadruplex & G>=40%	+	chr12:104349446-104349506:+	FALSE	5'- AGGAAGTTATTAATATCATAAGTTATTATTAATATTTTGAACACAGGTGGATGTGAAGGATTTTCATTTA -3' rG4seq-K -----------------------------------------------------------*----------	TXNRD1|ENSG00000198431.17	ENST00000503506.6;ENST00000525566.6;ENST00000526390.5;ENST00000526691.5;ENST00000527688.5	3UTR	58	13	58	1		37	10	43	3
chr12	110346585	110346586	two-quartet	+	chr12:110346570-110346585:+	FALSE	5'- GGCTGGTGATGGAGGTTTCATACTC -3' rG4seq-K ---------------*---------	ATP2A2|ENSG00000174437.18	ENST00000308664.10;ENST00000313432.5;ENST00000377685.9;ENST00000539276.7;ENST00000548169.2;ENST00000553144.1	3UTR	95	30	66	5		49	20	65	4
chr14	35029363	35029364	potential G-triplex & G>=40%	+	chr14:35029304-35029364:+	FALSE	5'- TCTTTTTCCTTCCTTCTTTCCTCCCTTTAATATAAGGGAGAAATACATGGTTTTTGTGGAAATCATTATA -3' rG4seq-K -----------------------------------------------------------*----------	SRP54|ENSG00000100883.13	ENST00000216774.11;ENST00000546080.6;ENST00000555557.5;ENST00000555746.6;ENST00000556994.5;ENST00000677621.1;ENST00000677647.1;ENST00000678274.1;ENST00000678477.1;ENST00000678519.1;ENST00000678627.1;ENST00000678836.1;ENST00000678963.1	3UTR	92	9	101	4		71	5	95	2
chr14	94111689	94111690	potential G-quadruplex & G>=40%	+	chr14:94111630-94111690:+	FALSE	5'- CTGAAGTTGAGGATCTCTTACTCTCTAGGCCACGGAATTAACCCGAGCAGGCATGGAGGCCTCTGCTCTC -3' rG4seq-K -----------------------------------------------------------*----------	IFI27|ENSG00000165949.13	ENST00000555081.5;ENST00000557700.1;ENST00000611954.4;ENST00000612813.4;ENST00000614204.4;ENST00000616764.5;ENST00000618200.4;ENST00000618863.1;ENST00000620396.4;ENST00000621160.5	5UTR;CDS	64	5	82	0		58	3	76	0
chr16	2770995	2770996	two-quartet	+	chr16:2770976-2770996:+	FALSE	5'- GGCAGCCCTTGGATGGAGGGCTCCCTTTCC -3' rG4seq-K -------------------*----------	SRRM2|ENSG00000167978.17	ENST00000301740.13;ENST00000570539.1;ENST00000573692.1;ENST00000574331.5;ENST00000630499.2	3UTR;CDS	189	27	158	6		139	26	148	6
chr16	56940141	56940142	potential G-quadruplex & G>=40%	+	chr16:56940082-56940142:+	FALSE	5'- CACAAGGTGGCCCTATTGTGGAAGAAGATGATGAAATAAATCGAGATTGGTTGGATTGGACCTATTCAGC -3' rG4seq-K -----------------------------------------------------------*----------	HERPUD1|ENSG00000051108.15	ENST00000300302.9;ENST00000344114.8;ENST00000379792.6;ENST00000439977.7;ENST00000563781.5;ENST00000563911.5;ENST00000564678.1;ENST00000567944.1;ENST00000568358.1;ENST00000568651.1;ENST00000570273.5	CDS	83	14	60	6		59	13	61	2
chr16	56943843	56943844	potential G-quadruplex & G>=40%	+	chr16:56943784-56943844:+	FALSE	5'- AAATGCAGTGCTTTACTTTAAACTAAGGGGAACTTTGCGGAGGTGAAAACCTTTGCTGGGTTTTCTGTTC -3' rG4seq-K -----------------------------------------------------------*----------	HERPUD1|ENSG00000051108.15	ENST00000300302.9;ENST00000344114.8;ENST00000379792.6;ENST00000439977.7;ENST00000564678.1	3UTR	305	19	312	9		187	19	262	9
chr17	16441633	16441634	two-quartet	+	chr17:16441617-16441633:+	FALSE	5'- GGCTGGAGTGTGGTGGCACAATCACA -3' rG4seq-K ----------------*---------	SNHG29|ENSG00000175061.19	ENST00000470491.7;ENST00000472367.5;ENST00000475947.7;ENST00000475953.6;ENST00000477249.7;ENST00000478103.6;ENST00000480811.6;ENST00000481027.5;ENST00000481898.6;ENST00000483140.7;ENST00000483588.2;ENST00000484836.2;ENST00000487066.6;ENST00000491009.6;ENST00000497774.6;ENST00000579473.6;ENST00000580180.6;ENST00000580770.5;ENST00000581361.5;ENST00000581718.6;ENST00000581913.5;ENST00000582911.6;ENS…	non_coding	55	14	25	3		24	7	20	1
chr19	2271497	2271498	potential G-quadruplex & G>=40%	+	chr19:2271438-2271498:+	FALSE	5'- CTCCTGATGCCCCTCACCCACCCCTGAAGATCCCAGGTGGGCGAGGGAATAGTCAGAGGGATCACAATCT -3' rG4seq-K -----------------------------------------------------------*----------	ENSG00000273734|ENSG00000273734.1;OAZ1|ENSG00000104904.12	ENST00000581150.6;ENST00000582888.8;ENST00000586054.2;ENST00000588673.3;ENST00000589361.2;ENST00000590943.6;ENST00000592727.3;ENST00000592787.2;ENST00000593012.1;ENST00000602676.6;ENST00000621615.1	CDS;non_coding	95	11	95	3		62	12	86	6
chr19	12944035	12944036	two-quartet	+	chr19:12944018-12944036:+	FALSE	5'- GGCTGGTTCGGATTTGGGGTGGATTTTG -3' rG4seq-K -----------------*----------	CALR|ENSG00000179218.15	ENST00000316448.10;ENST00000586760.2;ENST00000586967.2;ENST00000588454.6;ENST00000680816.1	3UTR	156	18	174	5		122	10	183	8
chr19	12944040	12944041	two-quartet	+	chr19:12944018-12944040:+	FALSE	5'- GGCTGGTTCGGATTTGGGGTGGATTTTGGTTT -3' rG4seq-K ----------------------*---------	CALR|ENSG00000179218.15	ENST00000316448.10;ENST00000586760.2;ENST00000586967.2;ENST00000588454.6;ENST00000680816.1	3UTR	284	86	214	22		227	86	210	15
chr2	74214515	74214516	potential G-quadruplex & G>=40%	+	chr2:74214456-74214516:+	FALSE	5'- GCCAGGAGCAGCCATTAACCTAGTGATTAATATGGGAGACATTACCATATGGAGGATGGATGCTTCACTT -3' rG4seq-K -----------------------------------------------------------*----------	MTHFD2|ENSG00000065911.13	ENST00000394053.7;ENST00000409601.1;ENST00000409804.5;ENST00000470592.5;ENST00000489041.2;ENST00000677170.1;ENST00000677299.1;ENST00000677377.1;ENST00000677558.1;ENST00000677997.1;ENST00000678228.1;ENST00000678340.1;ENST00000678623.1;ENST00000678633.1;ENST00000678684.1;ENST00000678731.1;ENST00000678955.1;ENST00000679055.1	3UTR	79	11	62	1		54	9	65	4
chr2	216500016	216500017	potential G-quadruplex & G>=40%	+	chr2:216499957-216500017:+	FALSE	5'- AAGAGACGAGCTGTGGGGATCTGGCACTGTGGTTCCTGCATGAAGACAGTGGCTGGCGGTGCCTGGACGT -3' rG4seq-K -----------------------------------------------------------*----------	RPL37A|ENSG00000197756.10	ENST00000359681.3;ENST00000420712.1;ENST00000427280.6;ENST00000441179.2;ENST00000446558.5;ENST00000456586.5;ENST00000478153.1;ENST00000487233.1;ENST00000490649.1;ENST00000491306.6;ENST00000598925.5;ENST00000600880.5	3UTR;CDS	130	14	127	5		86	12	89	4
chr20	18530696	18530697	two-quartet	+	chr20:18527609-18527611:+,chr20:18530679-18530697:+	TRUE	5'- GGAGGCTACATGGTAATGGGAGATTCTTTC -3' rG4seq-K -------------------*----------	SEC23B|ENSG00000101310.17	ENST00000262544.6;ENST00000336714.8;ENST00000377465.6;ENST00000643747.1;ENST00000650089.1	CDS	65	14	49	2		47	13	60	5
chr5	179722902	179722903	potential G-quadruplex & G>=40%	+	chr5:179722843-179722903:+	FALSE	5'- TTGAAGATCTGGAACCTTTCAGAATGACTCCTTTTAGTGCTATTGGTTTGGAGCTGTGGTCCATGACCTC -3' rG4seq-K -----------------------------------------------------------*----------	CANX|ENSG00000127022.16	ENST00000247461.9;ENST00000452673.6;ENST00000502296.6;ENST00000502673.6;ENST00000504734.5;ENST00000506654.6;ENST00000509563.2;ENST00000513246.6;ENST00000514032.5;ENST00000679395.1;ENST00000679471.1;ENST00000679523.1;ENST00000679527.1;ENST00000679642.1;ENST00000679719.1;ENST00000680006.1;ENST00000680013.1;ENST00000680042.1;ENST00000680092.1;ENST00000680406.1;ENST00000680504.1;ENST00000680614.1;ENS…	3UTR;CDS	86	13	43	3		61	19	56	9
chr6	36686103	36686104	two-quartet	+	chr6:36686090-36686104:+	FALSE	5'- GGAGGTTGGGTGGGCCGGCTTCAT -3' rG4seq-K -------------*----------	CDKN1A|ENSG00000124762.14	ENST00000244741.10;ENST00000405375.5;ENST00000448526.6;ENST00000615513.4	3UTR	62	29	75	5		47	32	50	8
chr7	155308436	155308437	potential G-quadruplex & G>=40%	+	chr7:155308377-155308437:+	FALSE	5'- CTGACTGTACAAATGACTCCTGGAAAAAACTCTTCACCTAGTCTAGAATAGGGAGGTGGAGAATGATGAC -3' rG4seq-K -----------------------------------------------------------*----------	INSIG1|ENSG00000186480.13	ENST00000340368.9;ENST00000342407.5;ENST00000344756.8;ENST00000476756.1	3UTR	76	7	85	3		55	9	60	2
chrM	1351	1352	potential G-quadruplex & G>=40%	+	chrM:1292-1352:+	FALSE	5'- CAAAGTAAGCGCAAGTACCCACGTAAAGACGTTAGGTCAAGGTGTAGCCCATGAGGTGGCAAGAAATGGG -3' rG4seq-K -----------------------------------------------------------*----------	MT-RNR1|ENSG00000211459.2	ENST00000389680.2	non_coding	572	27	436	12		389	16	432	7
chrM	1361	1363	potential G-quadruplex & G>=40%	+	chrM:1303-1363:+	FALSE	5'- CAAGTACCCACGTAAAGACGTTAGGTCAAGGTGTAGCCCATGAGGTGGCAAGAAATGGGCTACATTTTCT -3' rG4seq-K ----------------------------------------------------------**----------	MT-RNR1|ENSG00000211459.2	ENST00000389680.2	non_coding	3321	446	2945	301		2000	265	2612	252
chrM	2645	2648	potential G-quadruplex & G>=40%	+	chrM:2588-2648:+	FALSE	5'- AAAGGTAGCATAATCACTTGTTCCTTAAATAGGGACCTGTATGAATGGCTCCACGAGGGTTCAGCTGTCT -3' rG4seq-K ---------------------------------------------------------***----------	MT-RNR2|ENSG00000210082.2	ENST00000387347.2	non_coding	10024	768	9160	454		6596	512	8002	457
chrM	2826	2827	potential G-quadruplex & G>=40%	+	chrM:2767-2827:+	FALSE	5'- AACCCACAGGTCCTAAACTACCAAACCTGCATTAAAAATTTCGGTTGGGGCGACCTCGGAGCAGAACCCA -3' rG4seq-K -----------------------------------------------------------*----------	MT-RNR2|ENSG00000210082.2	ENST00000387347.2	non_coding	1907	155	2279	58		1308	101	2063	51
chrM	4974	4976	potential G-triplex & G>=40%	+	chrM:4916-4976:+	FALSE	5'- AACGTAAGCCTTCTCCTCACTCTCTCAATCTTATCCATCATAGCAGGCAGTTGAGGTGGATTAAACCAAA -3' rG4seq-K ----------------------------------------------------------**----------	MT-ND2|ENSG00000198763.3	ENST00000361453.3	CDS	543	24	515	11		392	13	501	7
chrM	12779	12780	potential G-triplex & G>=40%	+	chrM:12720-12780:+	FALSE	5'- CTAATCTTAGTTACCGCTAACAACCTATTCCAACTGTTCATCGGCTGAGAGGGCGTAGGAATTATATCCT -3' rG4seq-K -----------------------------------------------------------*----------	MT-ND5|ENSG00000198786.2	ENST00000361567.2	CDS	1870	44	2003	23		1221	28	1836	8
NC_006213.1	981	982	two-quartet	+	NC_006213.1:964-981:+	FALSE	5'- GGACGTGGCGGTTTTGGACATGTTTAT -3' rG4seq-K -----------------*---------	NA	NA	NA	4281	231	4350	129		2867	157	4074	111
NC_006213.1	2829	2830	potential G-quadruplex & G>=40%	+	NC_006213.1:2770-2830:+	FALSE	5'- CCACCTAAAGTTGCAGCTAAAATTTGCATTGTGGATAATGTTTATATGGCCAAGGCTGGTGACAAATATT -3' rG4seq-K -----------------------------------------------------------*----------	NA	NA	NA	22423	1189	21057	928		16169	856	20157	996
NC_006213.1	3199	3201	potential G-quadruplex & G>=40%	+	NC_006213.1:3141-3201:+	FALSE	5'- TGCCTTTTTACAGAAATTAGAGGATAATCCCCTATTTTTATTTGATGAGGCTGGCGAGGAAGTTCTTGCT -3' rG4seq-K ----------------------------------------------------------**----------	NA	NA	NA	1249	100	1193	59		865	79	1122	54
NC_006213.1	4275	4276	two-quartet	+	NC_006213.1:4252-4275:+	FALSE	5'- GGCCATATGGCACATGGTGGTGGTGTTGCAAAA -3' rG4seq-K -----------------------*---------	NA	NA	NA	248	19	281	7		178	16	241	4
NC_006213.1	5325	5326	potential G-triplex & G>=40%	+	NC_006213.1:5266-5326:+	FALSE	5'- TTGCTTGCCTATTACAACATGCTTGTTAATTGTTTTAAGTGGCAGGTTGTTGTTAATGGTAAGTATTTCA -3' rG4seq-K -----------------------------------------------------------*----------	NA	NA	NA	419	27	362	6		263	11	335	4
NC_006213.1	5508	5509	two-quartet	+	NC_006213.1:5478-5508:+	FALSE	5'- GGTTTTGGCCAAAGGTGGGTTTAAATTTGGAGATCCTGCT -3' rG4seq-K ------------------------------*---------	NA	NA	NA	258	16	218	7		172	18	258	14
NC_006213.1	5829	5830	potential G-quadruplex & G>=40%	+	NC_006213.1:5770-5830:+	FALSE	5'- AGTGTAAAATTACCTAAGGGTGTAGGAAGTGCAAATATTTTTATAGGTGATAAGGTTGGTCATTATGTTC -3' rG4seq-K -----------------------------------------------------------*----------	NA	NA	NA	738	24	659	16		491	26	608	11
NC_006213.1	6940	6943	potential G-triplex & G>=40%	+	NC_006213.1:6883-6943:+	FALSE	5'- GTAGCTTTAGCTTTTAAAAATGCATTTTTGACATTTAAGTGGAGTATGGTTGCTAGAGGTGCTTGCATTA -3' rG4seq-K ---------------------------------------------------------***----------	NA	NA	NA	789	192	588	63		458	128	487	47
NC_006213.1	7421	7422	two-quartet	+	NC_006213.1:7400-7421:+	FALSE	5'- GGAGTTTTAGGTTGCTGGTGGCTTTAGCTAA -3' rG4seq-K ---------------------*---------	NA	NA	NA	360	59	314	16		234	48	267	5
NC_006213.1	7635	7636	potential G-quadruplex & G>=40%	+	NC_006213.1:7576-7636:+	FALSE	5'- AAATGTAGTACTATCGTTGGTGGCATGATACGCTATTACGATGTTATGGCTAATGGTGGCACTGGCTTTT -3' rG4seq-K -----------------------------------------------------------*----------	NA	NA	NA	233	31	216	9		146	21	194	4
NC_006213.1	7641	7642	two-quartet	+	NC_006213.1:7623-7641:+	FALSE	5'- GGCTAATGGTGGCACTGGCTTTTGTTCA -3' rG4seq-K ------------------*---------	NA	NA	NA	298	58	222	12		183	39	212	10
NC_006213.1	13009	13010	potential G-triplex & G>=40%	+	NC_006213.1:12950-13010:+	FALSE	5'- GTCTTAAAATTAAGTACCTTTATTTTGTAAAAGGTTGTAACACACTAGCAAGAGGCTGGGTTGTTGGTAC -3' rG4seq-K -----------------------------------------------------------*----------	NA	NA	NA	726	29	677	16		500	31	626	22
NC_006213.1	13017	13018	potential G-quadruplex & G>=40%	+	NC_006213.1:12958-13018:+	FALSE	5'- ATTAAGTACCTTTATTTTGTAAAAGGTTGTAACACACTAGCAAGAGGCTGGGTTGTTGGTACAATTTCTT -3' rG4seq-K -----------------------------------------------------------*----------	NA	NA	NA	404	30	380	6		279	19	304	7
NC_006213.1	13419	13420	two-quartet	+	NC_006213.1:13402-13419:+	FALSE	5'- GGATTTTGGCGGGATGGAAGTTGTTCA -3' rG4seq-K -----------------*---------	NA	NA	NA	791	104	649	29		558	82	621	29
NC_006213.1	14054	14055	two-quartet	+	NC_006213.1:14033-14054:+	FALSE	5'- GGACAAATTGGTGGAGGTAGGCTTAGTAGGC -3' rG4seq-K ---------------------*---------	NA	NA	NA	116	28	126	5		63	16	99	7
NC_006213.1	15491	15492	potential G-quadruplex & G>=40%	+	NC_006213.1:15432-15492:+	FALSE	5'- AGTGAAATTGTTATGTGTGGTGGCTGTTATTATGTTAAGCCTGGTGGCACTAGTAGTGGTGATGCAACTA -3' rG4seq-K -----------------------------------------------------------*----------	NA	NA	NA	149	53	97	6		114	40	71	8
NC_006213.1	19417	19418	potential G-quadruplex & G>=40%	+	NC_006213.1:19358-19418:+	FALSE	5'- ATTCTTCTATTATTCAGATACGCCTTGTGTGTATATGGATGGCATGGATGCTAAGCAGGTTGATTATGTA -3' rG4seq-K -----------------------------------------------------------*----------	NA	NA	NA	167	34	141	7		119	34	147	7
NC_006213.1	19670	19671	potential G-quadruplex & G>=40%	+	NC_006213.1:19611-19671:+	FALSE	5'- AGCTTGGAGAATGTTGTATATAATTTAGTCAAGACTGGTCATTATACAGGACAGGCTGGTGAAATGCCTT -3' rG4seq-K -----------------------------------------------------------*----------	NA	NA	NA	276	38	268	18		171	31	256	23
NC_006213.1	19726	19727	potential G-quadruplex & G>=40%	+	NC_006213.1:19667-19727:+	FALSE	5'- TGGTGAAATGCCTTGTGCCATTATAAATGATAAAGTTGTGGCTAAGATCGATAAGGAGGATGTTGTCATT -3' rG4seq-K -----------------------------------------------------------*----------	NA	NA	NA	258	36	248	12		157	17	237	14
NC_006213.1	20095	20096	potential G-quadruplex & G>=40%	+	NC_006213.1:20036-20096:+	FALSE	5'- TAAGAGTCTTTCGATGATAAGAGGTCCACCGCGTGCTGAATTAAATGGCGTAGTGGTGGACAAGGTTGGA -3' rG4seq-K -----------------------------------------------------------*----------	NA	NA	NA	203	15	194	9		140	17	213	6
NC_006213.1	20247	20250	two-quartet	+	NC_006213.1:20226-20249:+	FALSE	5'- GGTAAACCCGGTAATGTCGGTGGTAATGATGCT -3' rG4seq-K ---------------------*-*---------	NA	NA	NA	2181	176	2037	141		1436	111	1881	144
NC_006213.1	22028	22029	potential G-quadruplex & G>=40%	+	NC_006213.1:21969-22029:+	FALSE	5'- TTAGTTAATTACATTCGTGATAAAGGTTGTGTTGCTGACCAATCCAGGAAATGGATTGGCCATTGCACCA -3' rG4seq-K -----------------------------------------------------------*----------	NA	NA	NA	384	19	388	9		269	16	350	8
NC_006213.1	23512	23513	potential G-quadruplex & G>=40%	+	NC_006213.1:23453-23513:+	FALSE	5'- TATGTTGGTGTTTATGATATTAATCATGGAGATGCTGGTTTTACTAGCATACTTAGTGGTTTGTTATATA -3' rG4seq-K -----------------------------------------------------------*----------	NA	NA	NA	1014	40	885	20		709	38	866	29
NC_006213.1	24263	24264	potential G-quadruplex & G>=40%	+	NC_006213.1:24204-24264:+	FALSE	5'- ACCACGTACAATCAATTCAACACAGGATGGTGATAATAAATTACAAGGTCTTTTAGAGGTCTCTGTTTGC -3' rG4seq-K -----------------------------------------------------------*----------	NA	NA	NA	1381	43	1392	29		988	32	1225	30
NC_006213.1	25016	25018	potential G-quadruplex & G>=40%	+	NC_006213.1:24958-25018:+	FALSE	5'- AGCATAACTATAGATAAGTTTGCTATACCCAATGGCAGGAAGGTTGACCTACAATTGGGTAATTTGGGCT -3' rG4seq-K ----------------------------------------------------------**----------	NA	NA	NA	2076	120	2376	45		1325	84	2105	36
NC_006213.1	25025	25027	potential G-quadruplex & G>=40%	+	NC_006213.1:24967-25027:+	FALSE	5'- ATAGATAAGTTTGCTATACCCAATGGCAGGAAGGTTGACCTACAATTGGGTAATTTGGGCTATTTGCAGT -3' rG4seq-K ----------------------------------------------------------**----------	NA	NA	NA	1557	113	1444	53		1023	80	1254	52
NC_006213.1	25473	25474	potential G-quadruplex & G>=40%	+	NC_006213.1:25414-25474:+	FALSE	5'- TTAGTTGGCATAGGTGAGCACTGTTCGGGTCTTGCTGTTAAAAGTGATTATTGTGGAGGCAATTCTTGTA -3' rG4seq-K -----------------------------------------------------------*----------	NA	NA	NA	1298	81	1233	39		933	66	1178	42
NC_006213.1	25513	25514	potential G-quadruplex & G>=40%	+	NC_006213.1:25454-25514:+	FALSE	5'- AAAGTGATTATTGTGGAGGCAATTCTTGTACTTGCCGACCACAAGCATTTTTGGGTTGGTCTGCAGACTC -3' rG4seq-K -----------------------------------------------------------*----------	NA	NA	NA	1150	62	1293	47		770	52	1219	41
NC_006213.1	26587	26589	potential G-quadruplex & G>=40%	+	NC_006213.1:26529-26589:+	FALSE	5'- ATCTGATGTCGGTTTTGTTGAGGCTTATAATAATTGTACAGGAGGTGCCGAAATTAGGGACCTCATTTGT -3' rG4seq-K ----------------------------------------------------------**----------	NA	NA	NA	2199	67	2202	51		1581	57	2188	42
NC_006213.1	27685	27686	potential G-quadruplex & G>=40%	+	NC_006213.1:27626-27686:+	FALSE	5'- TCAATCTCAAGGACATTGGTACATATGAATATTATGTAAAATGGCCTTGGTATGTATGGCTTTTAATCTG -3' rG4seq-K -----------------------------------------------------------*----------	NA	NA	NA	963	164	769	57		598	106	720	56
NC_006213.1	28183	28185	potential G-triplex & G>=40%	+	NC_006213.1:28125-28185:+	FALSE	5'- TTATGATAAATATTTTGGAGTAATAAATGGTTTCACAGCATTCGCTAATACTGTAGAGGATGCTGTTAAC -3' rG4seq-K ----------------------------------------------------------**----------	NA	NA	NA	10111	195	10247	163		6829	150	9444	141
NC_006213.1	28293	28296	potential G-quadruplex & G>=40%	+	NC_006213.1:28236-28296:+	FALSE	5'- ACAGGAGTTAAATGTTTATGGCTGATGCTTATCTTGCAGACACTGTGTGGTATGTGGGGCAAATAATTTT -3' rG4seq-K ---------------------------------------------------------***----------	NA	NA	NA	5953	227	5710	164		4358	179	5363	165
NC_006213.1	28604	28606	potential G-quadruplex & G>=40%	+	NC_006213.1:28546-28606:+	FALSE	5'- TATATCTGGACTGCTGATGAAGCTATTAAATTCCTAAAGGAATGGAATTTTTCTTTGGGTATTATACTAC -3' rG4seq-K ----------------------------------------------------------**----------	NA	NA	NA	17863	982	17395	859		12305	622	17292	810
NC_006213.1	29335	29336	potential G-triplex & G>=40%	+	NC_006213.1:29276-29336:+	FALSE	5'- GTAATGGCATCCTCAAGTGGGCCGATCAGTCCGACCAGTTTAGAAATGTTCAAACCAGGGGTAGAAGAGC -3' rG4seq-K -----------------------------------------------------------*----------	NA	NA	NA	5119	207	5372	163		3434	143	4860	160
NC_006213.1	29793	29799	potential G-quadruplex & G>=40%	+	NC_006213.1:29739-29799:+	FALSE	5'- TAGGTTTCCGCCTGGCACGGTACTCCCTCAGGGTTACTATATTGAAGGCTCAGGAAGGTCTGCTCCTAAT -3' rG4seq-K ------------------------------------------------------*-*-**----------	NA	NA	NA	73276	3969	71048	3746		48259	2622	63867	3460
NC_006213.1	29957	29958	potential G-quadruplex & G>=40%	+	NC_006213.1:29898-29958:+	FALSE	5'- TGTAACACCTGACATGGCTGATCAAATTGCTAGTCTTGTTCTGGCAAAACTTGGCAAGGATGCCACTAAA -3' rG4seq-K -----------------------------------------------------------*----------	NA	NA	NA	15160	323	15682	330		10190	221	14135	280
NC_006213.1	30108	30112	potential G-quadruplex & G>=40%	+	NC_006213.1:30052-30112:+	FALSE	5'- CAATGCACTGTTCAGCAGTGTTTTGGTAAGAGAGGCCCTAATCAGAATTTTGGTGGTGGAGAAATGTTAA -3' rG4seq-K --------------------------------------------------------*-**----------	NA	NA	NA	27003	1050	29433	731		18909	726	28323	716
NC_006213.1	30129	30130	potential G-quadruplex & G>=40%	+	NC_006213.1:30070-30130:+	FALSE	5'- TGTTTTGGTAAGAGAGGCCCTAATCAGAATTTTGGTGGTGGAGAAATGTTAAAACTTGGAACTAGTGACC -3' rG4seq-K -----------------------------------------------------------*----------	NA	NA	NA	24250	1923	20604	991		16471	1378	19363	894
chr1	8012633	8012634	potential G-quadruplex & G>=40%	-	chr1:8012633-8012693:-	FALSE	5'- CATTTATTTTTGCAGGCAATCTTTTCCATGGAGGGCAGGGTATCCATTCTTTACCATGGGTGTACCTGCT -3' rG4seq-K -----------------------------------------------------------*----------	ERRFI1|ENSG00000116285.13	ENST00000377482.10;ENST00000474874.5	3UTR	107	12	113	6		79	7	113	2
chr1	8012653	8012654	potential G-quadruplex & G>=40%	-	chr1:8012653-8012713:-	FALSE	5'- AGGCCTTTTCTATTTTGTTCCATTTATTTTTGCAGGCAATCTTTTCCATGGAGGGCAGGGTATCCATTCT -3' rG4seq-K -----------------------------------------------------------*----------	ERRFI1|ENSG00000116285.13	ENST00000377482.10;ENST00000474874.5	3UTR	127	11	180	8		84	10	147	4
chr1	8012959	8012962	bulges	-	chr1:8012960-8012984:-	FALSE	5'- GATGGTGGGGAGGGGAGGATGGGGAAGCTTTTTA -3' rG4seq-K ----------------------***---------	ERRFI1|ENSG00000116285.13	ENST00000377482.10;ENST00000474874.5	3UTR	214	80	136	26		162	64	131	20
chr1	8014083	8014084	potential G-triplex & G>=40%	-	chr1:8014083-8014143:-	FALSE	5'- TCTTCCACCGTTGCCAATCTCTGAAGCCCTCTCTCTGGATGACACAGACTGTGAGGTGGAATTCCTAACT -3' rG4seq-K -----------------------------------------------------------*----------	ERRFI1|ENSG00000116285.13	ENST00000377482.10;ENST00000467067.1;ENST00000469499.5;ENST00000474874.5;ENST00000487559.1	3UTR;CDS	130	7	154	3		82	6	126	2
chr1	150574806	150574807	potential G-quadruplex & G>=40%	-	chr1:150574806-150574866:-	FALSE	5'- GCTACGTAGTTCGGGCAAATCCTCCAAAAGGGAAAGGGAGGATTTGCTTAGAAGGATGGCGCTCCCAGTG -3' rG4seq-K -----------------------------------------------------------*----------	MCL1|ENSG00000143384.14	ENST00000369026.3;ENST00000464132.2;ENST00000620947.4;ENST00000676522.1;ENST00000678610.1;ENST00000678770.1	3UTR	148	38	106	8		106	21	101	6
chr1	153614518	153614519	potential G-quadruplex & G>=40%	-	chr1:153614518-153614578:-	FALSE	5'- GGGAAATGATTTGAATAATGGAGCTGGGAATATGGCTGGATATCTGGTACTAAAAAAGGGTCTTTAAGAA -3' rG4seq-K -----------------------------------------------------------*----------	S100A14|ENSG00000189334.9	ENST00000344616.4;ENST00000368701.5;ENST00000368702.5;ENST00000476873.5	3UTR	192	22	138	9		135	14	136	7
chr1	153974575	153974576	two-quartet	-	chr1:153974576-153974599:-	FALSE	5'- GGTTCTTTGGAGCCTTGTGGTGGAATCCCCTTT -3' rG4seq-K -----------------------*---------	ENSG00000285779|ENSG00000285779.1;JTB|ENSG00000143543.15	ENST00000271843.9;ENST00000356648.5;ENST00000368589.5;ENST00000648921.1	3UTR;non_coding	46	19	10	0		28	11	25	3
chr1	182383989	182383990	potential G-quadruplex & G>=40%	-	chr1:182383989-182384049:-	FALSE	5'- TAGCTGAAAGGGGAAGACCTGACGTACTCTGGTTAGGTTAGGACTTGCCCTCGTGGTGGAAACTTTTCTT -3' rG4seq-K -----------------------------------------------------------*----------	GLUL|ENSG00000135821.19	ENST00000311223.9;ENST00000331872.11;ENST00000339526.8;ENST00000417584.6;ENST00000491322.1;ENST00000642379.1	3UTR	13	4	11	1		7	3	9	1
chr11	10799707	10799708	two-quartet	-	chr11:10799707-10799728:-	FALSE	5'- GGAGATTTTGGAAGGAAAGGGACTGAGTTTC -3' rG4seq-K --------------------*----------	EIF4G2|ENSG00000110321.19	ENST00000339995.11;ENST00000396525.7;ENST00000525681.6;ENST00000526148.6;ENST00000528839.1;ENST00000532120.1;ENST00000532383.5;ENST00000534272.1	CDS	67	11	72	3		41	7	48	2
chr11	119044933	119044934	potential G-quadruplex & G>=40%	-	chr11:119044933-119044993:-	FALSE	5'- TTCTCTGCCCCTTGCCTAAAAGCCTGTACCTCTGGATTGGCGGAAGTAAATCTGGAAGGATTCTCACTCG -3' rG4seq-K -----------------------------------------------------------*----------	HYOU1|ENSG00000149428.20	ENST00000612687.4;ENST00000614711.4;ENST00000617285.5;ENST00000652093.1	3UTR	76	17	62	4		46	10	71	1
chr17	81511091	81511092	potential G-quadruplex & G>=40%	-	chr17:81511091-81511151:-	FALSE	5'- CCTCGGTGACACAGCATCACTAAGGGAGGGCTCTGTCCCCTAGGTATGGAATCTTGCGGCATCCACGAGA -3' rG4seq-K -----------------------------------------------------------*----------	ACTG1|ENSG00000184009.13	ENST00000570382.2;ENST00000571691.6;ENST00000571721.6;ENST00000572105.7;ENST00000573283.7;ENST00000574671.6;ENST00000575087.5;ENST00000575659.6;ENST00000575842.5;ENST00000575994.6;ENST00000576209.5;ENST00000576214.3;ENST00000576544.6;ENST00000576917.5;ENST00000615544.5;ENST00000644774.2;ENST00000679410.1;ENST00000679480.1;ENST00000679535.1;ENST00000679778.1;ENST00000680227.1;ENST00000680727.1;ENS…	3UTR;CDS	81	6	66	2		67	9	98	8
chr17	81843779	81843780	potential G-quadruplex & G>=40%	-	chr17:81843779-81843839:-	FALSE	5'- TTCCTTCTGCTTTTCGGTTTTTGGAAAGGGATCCATCTCCAGGCAGCCCACCCTGGTGGGGCTTGTTTCC -3' rG4seq-K -----------------------------------------------------------*----------	P4HB|ENSG00000185624.16	ENST00000331483.9;ENST00000415593.6;ENST00000439918.7;ENST00000466567.3;ENST00000472244.6;ENST00000473021.2;ENST00000474712.2;ENST00000476482.2;ENST00000477607.7;ENST00000484286.2;ENST00000570907.6;ENST00000571507.6;ENST00000571617.2;ENST00000574914.2;ENST00000575069.6;ENST00000576390.6;ENST00000679366.1;ENST00000679396.1;ENST00000679439.1;ENST00000679455.1;ENST00000679470.1;ENST00000679628.1;ENS…	3UTR	199	23	244	16		136	14	223	11
chr19	3976290	3976291	canonical/G3L1-7	-	chr19:3976290-3976312:-	FALSE	5'- GGGGAGGGGGAGGCGGGATGGGACACCCAACA -3' rG4seq-K ---------------------*----------	EEF2|ENSG00000167658.16	ENST00000309311.7;ENST00000600794.1	3UTR;CDS	215	48	205	29		150	34	195	35
chr2	241247137	241247138	two-quartet	-	chr2:241248002-241248015:-,chr2:241247138-241247142:-	TRUE	5'- GGTGGCAGATCTGGTGGAAAATAGCTA -3' rG4seq-K -----------------*---------	HDLBP|ENSG00000115677.18	ENST00000310931.10;ENST00000373292.8;ENST00000391975.5;ENST00000391976.6;ENST00000427183.6;ENST00000452931.1;ENST00000460826.1;ENST00000487169.5;ENST00000488923.1	CDS	30	13	22	1		24	10	16	1
chr20	647301	647302	two-quartet	-	chr20:647302-647327:-	FALSE	5'- GGATGGGTATTTATTTGGATAAAGGTATTTCCCTC -3' rG4seq-K -------------------------*---------	ENSG00000270299|ENSG00000270299.1;SRXN1|ENSG00000271303.2	ENST00000381962.4;ENST00000488788.2	3UTR	171	30	124	14		102	26	97	6
chr22	38484744	38484745	potential G-quadruplex & G>=40%	-	chr22:38484744-38484804:-	FALSE	5'- GGCATCCTTTTGCACTCAGCTTATTACAGGTAGGTAGTGCTTAAGAAAAGTCATGGAGGACTAAAGCCTA -3' rG4seq-K -----------------------------------------------------------*----------	DDX17|ENSG00000100201.23	ENST00000396821.8;ENST00000403230.3	3UTR	35	7	28	1		23	4	30	2
chr3	57572101	57572102	potential G-quadruplex & G>=40%	-	chr3:57572101-57572161:-	FALSE	5'- TTGTTACAACAAAATTAGTTTGTATCTTGGTTATTAAACAGTATCTGGGACTGGTTTGGGCAGAATATTA -3' rG4seq-K -----------------------------------------------------------*----------	ARF4|ENSG00000168374.11	ENST00000303436.11;ENST00000486310.5;ENST00000489843.1;ENST00000496292.5	3UTR	60	9	61	1		56	9	63	2
chr3	170866371	170866372	two-quartet	-	chr3:170866372-170866389:-	FALSE	5'- GGAGGACTAGGCAAAGGCTCCCCTTAC -3' rG4seq-K -----------------*---------	RPL22L1|ENSG00000163584.18	ENST00000295830.13;ENST00000463836.1;ENST00000466674.5;ENST00000475836.5;ENST00000478578.1;ENST00000494771.5	3UTR;CDS	115	11	116	5		76	10	107	2
chr6	31535069	31535070	two-quartet	-	chr6:31535070-31535083:-	FALSE	5'- GGGGGAGGGCAGGATTTTTCTGC -3' rG4seq-K -------------*---------	ATP6V1G2-DDX39B|ENSG00000254870.5;DDX39B|ENSG00000198563.14	ENST00000376177.6;ENST00000376185.5;ENST00000396172.6;ENST00000427214.5;ENST00000431908.5;ENST00000458640.5;ENST00000462256.5;ENST00000481456.1;ENST00000482195.5;ENST00000484566.5	non_coding	53	12	71	8		41	13	66	9
chr6	36968407	36968408	two-quartet	-	chr6:36968408-36968436:-	FALSE	5'- GGCCTATGCTAGGAGGCAAATGGCCAGGCTCTGCCTGT -3' rG4seq-K ----------------------------*---------	MTCH1|ENSG00000137409.20	ENST00000373616.9;ENST00000373627.10	3UTR	51	6	60	0		32	7	46	1
chr6	47231771	47231772	two-quartet	-	chr6:47231771-47231789:-	FALSE	5'- GGCCTTGGTCCTGGTGGGATTCCTTCAC -3' rG4seq-K -----------------*----------	TNFRSF21|ENSG00000146072.6	ENST00000296861.2	3UTR	100	12	113	3		75	14	90	1
chr6	82170582	82170583	potential G-quadruplex & G>=40%	-	chr6:82170582-82170642:-	FALSE	5'- TTCTGAAAATAAATGCTTAATTACATATACAGGAATTAAATAGTTTGGAAGAGGGTTGGATTATCATTAC -3' rG4seq-K -----------------------------------------------------------*----------	IBTK|ENSG00000005700.15	ENST00000306270.12;ENST00000445419.6;ENST00000505222.5;ENST00000508381.1;ENST00000610980.4	3UTR	64	15	58	5		38	7	61	2
chr7	6466122	6466123	potential G-quadruplex & G>=40%	-	chr7:6466122-6466182:-	FALSE	5'- AACTGGATCTGGCGCTTCTACTTTGAGGGCTTCTTTGACCTCATTGCTGTGGTGGCCGGCGTAGTCCAGA -3' rG4seq-K -----------------------------------------------------------*----------	DAGLB|ENSG00000164535.15;KDELR2|ENSG00000136240.10	ENST00000258739.9;ENST00000436575.5;ENST00000454368.2;ENST00000463747.1;ENST00000490996.1	CDS;non_coding	27	4	30	1		30	7	34	2
chr7	56101644	56101646	potential G-quadruplex & G>=40%	-	chr7:56101644-56101704:-	FALSE	5'- AATGGAAGTGGGGGTGTCCCTACTCTGTAGAATCTGGGACTGGGCAAATGTTTGTGTGGCCTCCTTAAAC -3' rG4seq-K ----------------------------------------------------------**----------	CHCHD2|ENSG00000106153.13	ENST00000395422.4	3UTR	61	10	39	4		31	7	37	3
chr7	121350084	121350085	two-quartet	-	chr7:121350085-121350109:-	FALSE	5'- GGAATAATAGGGATTTTAGGGTGGATACTTTATT -3' rG4seq-K ------------------------*---------	FAM3C|ENSG00000196937.11	ENST00000359943.8	3UTR	65	31	28	3		26	13	36	4
