# Supplementary material
Source: HighWire-hosted journal article supplement (doi:10.1101/rna.080321.124)
Supplement: Supplemental_Table_S6.xlsx [file Supplemental_Table_S6.xlsx]

## Sheet: PDS_DN-result.csv.new
In vitro rG4 PDS											Biological rep1					Biological rep2
chromosome	start	end	rG4_structural_class	strand	rG4_intervals	splicing	sequence_diagram	'oc43'_gene_names	'oc43'_coding_regions	'oc43'_transcript_ids	BR1_K+ coverage	BR1_K+stop	BR1_Li+coverage	BR1_Li+stop		DNrep2_K_cov	DNrep2_K_stop	DNrep2_Li_cov	DNrep2_Li_stop
chr1	26864034	26864035	two-quartet	+	chr1:26864013-26864034:+	FALSE	5'- GGACTAGTATGGGGTGGGAGGCCCCACCCTT -3' rG4seq-K ---------------------*---------	SFN|ENSG00000175793.12	ENST00000339276.6	3UTR	87	59	24	2		20	10	32	1
chr1	153645511	153645512	two-quartet	+	chr1:153645497-153645511:+	FALSE	5'- GGGGGGAGGGGGGGTTTCCCCTCC -3' rG4seq-K --------------*---------	CHTOP|ENSG00000160679.13	ENST00000368690.7;ENST00000368694.8;ENST00000403433.5;ENST00000614256.4	3UTR	71	62	37	8		14	11	16	4
chr1	155017493	155017494	bulges	+	chr1:155017464-155017495:+	FALSE	5'- GGGGCCAGAGGGCAGGGCGGGCCGGGCGGCGTCCTACCCTC -3' rG4seq-K -----------------------------*-----------	ZBTB7B|ENSG00000160685.14	ENST00000368426.3;ENST00000417934.6;ENST00000535420.6	3UTR	73	31	37	3		20	14	33	6
chr1	202015780	202015781	potential G-quadruplex & G>=40%	+	chr1:202015721-202015781:+	FALSE	5'- ACCTTCTTTCTGGACTGGCGTTCACCTCCCTGCTCAGTGCTTGGGCTCCACGGGCAGGGGTCAGAGCACT -3' rG4seq-K -----------------------------------------------------------*----------	ELF3|ENSG00000163435.16	ENST00000359651.7;ENST00000367283.7;ENST00000367284.10;ENST00000475698.1	3UTR	50	36	14	4		27	23	8	2
chr10	102402505	102402506	two-quartet	+	chr10:102402472-102402505:+	FALSE	5'- GGACAAATAAAGGATTCTCATGGGAAGGGGAGGACCCCTCCTT -3' rG4seq-K ---------------------------------*---------	NFKB2|ENSG00000077150.20	ENST00000189444.11;ENST00000369966.8;ENST00000428099.6;ENST00000651907.1;ENST00000652277.1;ENST00000661543.1	3UTR	64	27	12	0		16	8	21	2
chr11	62881892	62881894	bulges	+	chr11:62881421-62881447:+,chr11:62881892-62881893:+	TRUE	5'- GGGCCACGGCGCGGGCAACCTGGCGGGTCTGAAGGGG -3' rG4seq-K --------------------------**---------	SLC3A2|ENSG00000168003.18	ENST00000338663.12;ENST00000377889.6;ENST00000377890.6;ENST00000377891.6;ENST00000457660.6;ENST00000535296.5;ENST00000535768.2;ENST00000536981.6;ENST00000537508.6;ENST00000537839.5;ENST00000538084.2;ENST00000538682.6;ENST00000539458.1;ENST00000539891.6;ENST00000541425.6;ENST00000541649.2;ENST00000544377.2;ENST00000546253.5;ENST00000679594.1;ENST00000679908.1;ENST00000680002.1;ENST00000680134.1;EN…	CDS	103	54	59	4		35	24	21	4
chr11	65503708	65503709	potential G-triplex & G>=40%	+	chr11:65503649-65503709:+	FALSE	5'- CCTTATTTAAATAAAATAGTGTTTGTCTGTAGTTCAGTGTTGGGGCAATCTTGGGGGGGATTCTTCTCTA -3' rG4seq-K -----------------------------------------------------------*----------	MALAT1|ENSG00000251562.9	ENST00000534336.1;ENST00000612781.1;ENST00000616527.4;ENST00000618925.1;ENST00000619449.2;ENST00000620465.4	non_coding	409	293	119	30		126	88	139	31
chr11	65504632	65504633	two-quartet	+	chr11:65504619-65504633:+	FALSE	5'- GGTGGTGGGAGGGGACTGAAGCCT -3' rG4seq-K -------------*----------	MALAT1|ENSG00000251562.9	ENST00000534336.1;ENST00000610851.1;ENST00000612781.1;ENST00000613376.1;ENST00000618132.1;ENST00000619449.2	non_coding	380	258	160	60		130	94	164	55
chr11	65505470	65505471	potential G-triplex & G>=40%	+	chr11:65505411-65505471:+	FALSE	5'- TTTTTATAGCAGCTCTTAATAATAAAGCCCAAATCTCAAGCGGTGCTTGAAGGGGAGGGAAAGGGGGAAA -3' rG4seq-K -----------------------------------------------------------*----------	MALAT1|ENSG00000251562.9	ENST00000534336.1;ENST00000610851.1;ENST00000616691.1;ENST00000617489.1;ENST00000618227.1;ENST00000619449.2	non_coding	61	50	7	2		21	19	14	2
chr11	65505919	65505920	bulges	+	chr11:65505894-65505919:+	FALSE	5'- GTGGCTGAGAGGGCTTTTGGGTGGGAATGCAAAAA -3' rG4seq-K -------------------------*---------	MALAT1|ENSG00000251562.9	ENST00000534336.1;ENST00000610851.1;ENST00000616691.1;ENST00000617489.1;ENST00000618227.1;ENST00000619449.2	non_coding	193	157	51	26		62	51	34	15
chr12	6537881	6537883	bulges	+	chr12:6537846-6537882:+	FALSE	5'- GCAGGCGTCGGAGGGCCCCCTCAAGGGCATCCTGGGCTACACTGAG -3' rG4seq-K -----------------------------------**---------	GAPDH|ENSG00000111640.15	ENST00000229239.10;ENST00000396856.5;ENST00000396858.5;ENST00000396859.5;ENST00000396861.5;ENST00000466525.1;ENST00000466588.5;ENST00000474249.5;ENST00000619601.1	CDS	294	149	36	9		54	29	37	9
chr12	6538322	6538324	potential G-triplex & G>=40%	+	chr12:6538264-6538324:+	FALSE	5'- TGAATCTCCCCTCCTCACAGTTGCCATGTAGACCCCTTGAAGAGGGGAGGGGCCTAGGGAGCCGCACCTT -3' rG4seq-K ----------------------------------------------------------**----------	GAPDH|ENSG00000111640.15	ENST00000229239.10;ENST00000396856.5;ENST00000396858.5;ENST00000396859.5;ENST00000396861.5;ENST00000466525.1;ENST00000466588.5;ENST00000474249.5;ENST00000619601.1	3UTR	379	260	97	15		103	64	93	13
chr12	12914902	12914903	potential G-quadruplex & G>=40%	+	chr12:12914843-12914903:+	FALSE	5'- TCCTGATCTTAAGTGATCTGCCCGCCTTGGCCTCCCAAAGTGCTGGGATTACGGGTGGGAATCACCATGC -3' rG4seq-K -----------------------------------------------------------*----------	GPRC5A|ENSG00000013588.9	ENST00000014914.6	3UTR	112	97	16	7		28	24	11	3
chr12	12917829	12917830	two-quartet	+	chr12:12917814-12917830:+	FALSE	5'- GGAAAGGGTGGTGGGGCAACACTGCT -3' rG4seq-K ---------------*----------	GPRC5A|ENSG00000013588.9	ENST00000014914.6	3UTR	27	22	11	1		6	6	13	2
chr12	52952879	52952880	two-quartet	+	chr12:52952855-52952879:+	FALSE	5'- GGGTACCCTTTGGGGAGCAGGAGGCCAATAAAAA -3' rG4seq-K ------------------------*---------	KRT18|ENSG00000111057.11	ENST00000388835.4;ENST00000388837.6;ENST00000549078.5	3UTR	48	36	13	2		13	12	6	1
chr12	57234685	57234686	two-quartet	+	chr12:57234669-57234685:+	FALSE	5'- GGCAGGGGTGGGTAGGCACCCTCCTT -3' rG4seq-K ----------------*---------	SHMT2|ENSG00000182199.11	ENST00000328923.8;ENST00000414700.7;ENST00000449049.7;ENST00000553837.5;ENST00000554467.5;ENST00000555116.5;ENST00000555774.5;ENST00000556825.5;ENST00000557433.5;ENST00000557487.5;ENST00000557529.1	3UTR	87	55	18	3		31	21	31	5
chr12	103947811	103947812	bulges	+	chr12:103947783-103947811:+	FALSE	5'- GGGATTATGGGTCACAGGAAAAAGTGGGTTTTTTAGTT -3' rG4seq-K ----------------------------*---------	HSP90B1|ENSG00000166598.16	ENST00000299767.10;ENST00000548462.5;ENST00000550595.2;ENST00000614327.2;ENST00000679538.1;ENST00000679779.1;ENST00000679861.1;ENST00000680281.1;ENST00000680316.1;ENST00000680370.1;ENST00000680391.1;ENST00000680478.1;ENST00000680653.1;ENST00000680663.1;ENST00000680899.1;ENST00000680989.1;ENST00000681172.1;ENST00000681174.1;ENST00000681245.1;ENST00000681698.1;ENST00000681704.1;ENST00000681910.1;EN…	3UTR	217	148	71	24		92	62	71	17
chr12	104349505	104349506	potential G-quadruplex & G>=40%	+	chr12:104349446-104349506:+	FALSE	5'- AGGAAGTTATTAATATCATAAGTTATTATTAATATTTTGAACACAGGTGGATGTGAAGGATTTTCATTTA -3' rG4seq-K -----------------------------------------------------------*----------	TXNRD1|ENSG00000198431.17	ENST00000503506.6;ENST00000525566.6;ENST00000526390.5;ENST00000526691.5;ENST00000527688.5	3UTR	120	90	31	13		39	29	36	14
chr12	110342381	110342382	potential G-quadruplex & G>=40%	+	chr12:110342322-110342382:+	FALSE	5'- GATGGTCCTGGCGGATGACAACTTCTCCACCATTGTGGCTGCCGTTGAGGAGGGGCGGGCAATCTACAAC -3' rG4seq-K -----------------------------------------------------------*----------	ATP2A2|ENSG00000174437.18	ENST00000308664.10;ENST00000377685.9;ENST00000539276.7;ENST00000548169.2	3UTR;CDS	90	72	17	6		26	20	24	7
chr12	120534510	120534511	potential G-quadruplex & G>=40%	+	chr12:120534451-120534511:+	FALSE	5'- AGACAGCCAGCCCTCTCCCCTGCCTCGCGGCGGGAGAGCGTGTCCGGCCGGCCGGCCGGCGGGGCTCGCG -3' rG4seq-K -----------------------------------------------------------*----------	RNF10|ENSG00000022840.17	ENST00000325954.9;ENST00000539486.1;ENST00000542438.1	5UTR	16	12	12	1		12	6	12	0
chr14	55138171	55138172	potential G-quadruplex & G>=40%	+	chr14:55138112-55138172:+	FALSE	5'- GCCTGCTGGGGCAGGGGGCTACCCAGGGGCTTCCTATCCTGGGGCCTACCCCGGGCAGGCACCCCCAGGG -3' rG4seq-K -----------------------------------------------------------*----------	LGALS3|ENSG00000131981.16	ENST00000254301.14;ENST00000553493.5;ENST00000553755.5;ENST00000554715.1;ENST00000556263.1;ENST00000556322.1;ENST00000556438.6	CDS	286	72	104	6		94	20	109	7
chr14	94111743	94111744	two-quartet	+	chr14:94111723-94111743:+	FALSE	5'- GGCCAAAGTGGTCAGGGTGGCCTCTGGCTC -3' rG4seq-K --------------------*---------	IFI27|ENSG00000165949.13	ENST00000555081.5;ENST00000557700.1;ENST00000611954.4;ENST00000612813.4;ENST00000614204.4;ENST00000616764.5;ENST00000618200.4;ENST00000618863.1;ENST00000620396.4;ENST00000621160.5	CDS	40	18	17	1		19	8	9	0
chr15	39588587	39588588	potential G-quadruplex & G>=40%	+	chr15:39588528-39588588:+	FALSE	5'- ATGGAGGCTGGGGTCCTTGGTCACCATGGGACATCTGTTCTGTCACCTGTGGAGGAGGGGTACAGAAACG -3' rG4seq-K -----------------------------------------------------------*----------	THBS1|ENSG00000137801.11	ENST00000260356.6;ENST00000497720.1	CDS	35	27	15	5		18	13	6	1
chr16	2770995	2770997	two-quartet	+	chr16:2770976-2770996:+	FALSE	5'- GGCAGCCCTTGGATGGAGGGCTCCCTTTCC -3' rG4seq-K -------------------**---------	SRRM2|ENSG00000167978.17	ENST00000301740.13;ENST00000570539.1;ENST00000573692.1;ENST00000574331.5;ENST00000630499.2	3UTR;CDS	171	71	100	20		75	31	88	16
chr16	56943844	56943845	potential G-quadruplex & G>=40%	+	chr16:56943785-56943845:+	FALSE	5'- AATGCAGTGCTTTACTTTAAACTAAGGGGAACTTTGCGGAGGTGAAAACCTTTGCTGGGTTTTCTGTTCA -3' rG4seq-K -----------------------------------------------------------*----------	HERPUD1|ENSG00000051108.15	ENST00000300302.9;ENST00000344114.8;ENST00000379792.6;ENST00000439977.7;ENST00000564678.1	3UTR	312	200	111	20		98	63	89	16
chr17	3669271	3669272	two-quartet	+	chr17:3669256-3669271:+	FALSE	5'- GGGGGCCACGGCCGGCATCCTCGGC -3' rG4seq-K ---------------*---------	EMC6|ENSG00000127774.7	ENST00000248378.6;ENST00000397133.2	CDS	39	23	10	1		16	13	11	2
chr17	7225071	7225072	bulges	+	chr17:7225051-7225071:+	FALSE	5'- GGTGGAGCGGGGTGGTGTGGTCACCAGCAA -3' rG4seq-K --------------------*---------	ACADVL|ENSG00000072778.20	ENST00000322910.9;ENST00000350303.9;ENST00000356839.10;ENST00000542255.6;ENST00000543245.6;ENST00000578033.1;ENST00000578319.5;ENST00000578711.1;ENST00000578809.5;ENST00000579425.5;ENST00000583848.5;ENST00000583850.5;ENST00000583858.5	3UTR;CDS	56	39	9	2		11	8	13	1
chr17	8467735	8467736	two-quartet	+	chr17:8467718-8467735:+	FALSE	5'- GGGGTGAGGGAGGCGGGCAGCCTCTCG -3' rG4seq-K -----------------*---------	NDEL1|ENSG00000166579.16	ENST00000334527.12;ENST00000380025.8;ENST00000578172.1;ENST00000581679.1;ENST00000583683.1	3UTR	187	173	18	3		68	64	21	11
chr17	81701861	81701862	potential G-quadruplex & G>=40%	+	chr17:81701802-81701862:+	FALSE	5'- GTCTCTGCTTTCTTTCCCCAGGGCTGGGCCATGGGGAGGGAAGGACTTTCTCCCAGGGGAAGCCCCCAGC -3' rG4seq-K -----------------------------------------------------------*----------	HGS|ENSG00000185359.14	ENST00000329138.9;ENST00000570652.2;ENST00000573320.2;ENST00000573949.1;ENST00000676478.1;ENST00000676546.1;ENST00000676729.1;ENST00000677044.1;ENST00000677109.1;ENST00000677159.1;ENST00000677161.1;ENST00000677225.1;ENST00000677243.1;ENST00000677466.1;ENST00000677484.1;ENST00000677663.1;ENST00000678096.1;ENST00000678105.1;ENST00000678115.1;ENST00000678196.1;ENST00000678541.1;ENST00000678607.1;ENS…	3UTR	52	34	8	1		27	19	11	3
chr19	583029	583030	two-quartet	+	chr19:583015-583029:+	FALSE	5'- GGCCGGGTGGGCGGCACAGCCTTC -3' rG4seq-K --------------*---------	BSG|ENSG00000172270.22	ENST00000333511.9;ENST00000346916.9;ENST00000353555.9;ENST00000545507.6;ENST00000571735.3;ENST00000573784.6;ENST00000576925.4;ENST00000576984.3;ENST00000614867.2;ENST00000618006.4;ENST00000618112.4;ENST00000679472.1;ENST00000680065.1;ENST00000680326.1;ENST00000680552.1	3UTR	23	15	10	1		11	6	8	0
chr19	2271497	2271499	potential G-quadruplex & G>=40%	+	chr19:2271439-2271499:+	FALSE	5'- TCCTGATGCCCCTCACCCACCCCTGAAGATCCCAGGTGGGCGAGGGAATAGTCAGAGGGATCACAATCTT -3' rG4seq-K ----------------------------------------------------------**----------	ENSG00000273734|ENSG00000273734.1;OAZ1|ENSG00000104904.12	ENST00000581150.6;ENST00000582888.8;ENST00000586054.2;ENST00000588673.3;ENST00000589361.2;ENST00000590943.6;ENST00000592727.3;ENST00000592787.2;ENST00000593012.1;ENST00000602676.6;ENST00000621615.1	CDS;non_coding	443	212	146	33		121	65	132	30
chr19	10259990	10259991	bulges	+	chr19:10259956-10259990:+	FALSE	5'- GGGAAGGGGCGACTCCACGGAAAGCCCAGACGGGCTTCTGCATC -3' rG4seq-K ----------------------------------*---------	MRPL4|ENSG00000105364.14	ENST00000253099.11;ENST00000307422.9;ENST00000393733.6	3UTR	32	17	12	1		8	7	6	0
chr19	10831795	10831796	two-quartet	+	chr19:10831778-10831795:+	FALSE	5'- GGGTGGGCCCAGGGCGGCCTCTCTCTG -3' rG4seq-K -----------------*---------	DNM2|ENSG00000079805.19	ENST00000355667.11;ENST00000359692.10;ENST00000389253.9;ENST00000590806.5;ENST00000591818.1;ENST00000593203.1;ENST00000681972.1	3UTR	173	156	23	6		36	29	17	6
chr19	12944242	12944243	two-quartet	+	chr19:12944225-12944242:+	FALSE	5'- GGGGGGCAGTGGTGTGGAGAAGCCACA -3' rG4seq-K -----------------*---------	CALR|ENSG00000179218.15	ENST00000316448.10;ENST00000586760.2;ENST00000586967.2;ENST00000588454.6	3UTR	330	276	46	5		110	84	52	8
chr19	12944309	12944311	two-quartet	+	chr19:12944291-12944313:+	FALSE	5'- GGAGGGCAGCAGAAGGGGGTGGTGTCTCCAAC -3' rG4seq-K ------------------**------------	CALR|ENSG00000179218.15	ENST00000316448.10;ENST00000586760.2;ENST00000586967.2;ENST00000588454.6	3UTR	309	120	112	12		83	34	97	12
chr19	12944313	12944314	two-quartet	+	chr19:12944291-12944313:+	FALSE	5'- GGAGGGCAGCAGAAGGGGGTGGTGTCTCCAAC -3' rG4seq-K ----------------------*---------	CALR|ENSG00000179218.15	ENST00000316448.10;ENST00000586760.2;ENST00000586967.2;ENST00000588454.6	3UTR	397	190	88	26		122	63	88	30
chr19	12944409	12944411	bulges	+	chr19:12944380-12944411:+	FALSE	5'- GCCCCCAGGACTGGGCCACTTCTGGGTGGGGCAGTGGGTCC -3' rG4seq-K -----------------------------**----------	CALR|ENSG00000179218.15	ENST00000316448.10;ENST00000586760.2;ENST00000586967.2;ENST00000588454.6	3UTR	152	79	73	10		51	26	94	8
chr19	13154552	13154555	potential G-quadruplex & G>=40%	+	chr19:13154495-13154555:+	FALSE	5'- CACCCCCGCGTGCTGCTGGTTAATGTCCCGCGTCTCTGCACCTTCGGGTGGGAGCGGGGACTGATCTACT -3' rG4seq-K ---------------------------------------------------------***----------	IER2|ENSG00000160888.7	ENST00000292433.4;ENST00000588173.1	3UTR	341	240	79	25		88	60	67	13
chr19	35738844	35738845	two-quartet	+	chr19:35738826-35738844:+	FALSE	5'- GGTGGGGTCCCAGGTGGGAACCCCCCCA -3' rG4seq-K ------------------*---------	KMT2B|ENSG00000272333.8	ENST00000420124.4;ENST00000585476.5;ENST00000592092.2;ENST00000673918.2;ENST00000674101.1;ENST00000674114.2;ENST00000686920.1;ENST00000689544.1;ENST00000691855.1;ENST00000692961.1;ENST00000693161.1;ENST00000693677.1	3UTR	77	70	6	0		22	14	9	1
chr19	38729483	38729485	two-quartet	+	chr19:38729463-38729484:+	FALSE	5'- GGCCTCCAGGAGGGGCCTGGGCAGCCCCACA -3' rG4seq-K --------------------**---------	ACTN4|ENSG00000130402.13	ENST00000252699.7;ENST00000424234.7;ENST00000440400.2;ENST00000497637.5;ENST00000589528.1	3UTR	208	77	78	16		73	35	94	17
chr19	38729750	38729751	potential G-quadruplex & G>=40%	+	chr19:38729691-38729751:+	FALSE	5'- TTAACCAAGGAGGGGCCAGTGGATTCCCACAGCACAACCGGTCCCTTCCATGCCCTGGGATGCCTCACCA -3' rG4seq-K -----------------------------------------------------------*----------	ACTN4|ENSG00000130402.13	ENST00000252699.7;ENST00000440400.2;ENST00000497637.5;ENST00000589528.1	3UTR	120	41	40	3		47	16	49	4
chr19	39384507	39384508	bulges	+	chr19:39384480-39384507:+	FALSE	5'- GGGAAAGGGGATTGTTTGGTTTTTGGGTTTTTCCCTA -3' rG4seq-K ---------------------------*---------	SAMD4B|ENSG00000179134.16	ENST00000314471.10;ENST00000596368.1;ENST00000610417.5	3UTR	80	68	16	4		20	15	15	4
chr19	45526905	45526906	bulges	+	chr19:45526869-45526905:+	FALSE	5'- GAGGAAATAAGATGAGGGAGAAAGGAGAAGGGGAGGAAACTTCTCC -3' rG4seq-K ------------------------------------*---------	VASP|ENSG00000125753.14	ENST00000245932.11;ENST00000586014.5	3UTR	79	46	18	4		22	15	14	3
chr2	85544834	85544835	two-quartet	+	chr2:85544821-85544834:+	FALSE	5'- GGCGGGGAGGAGGAAATCCCTTC -3' rG4seq-K -------------*---------	MAT2A|ENSG00000168906.13	ENST00000306434.8	3UTR	64	56	18	7		23	22	19	8
chr2	119372409	119372410	two-quartet	+	chr2:119372391-119372409:+	FALSE	5'- GGATGGTGGGAATTCGGGAAAATAACCA -3' rG4seq-K ------------------*---------	DBI|ENSG00000155368.18	ENST00000311521.8;ENST00000355857.8;ENST00000393103.2;ENST00000409094.5;ENST00000460901.1;ENST00000475783.1;ENST00000535617.5;ENST00000535757.5;ENST00000627093.2;ENST00000627305.2	3UTR	48	38	14	3		14	11	12	2
chr20	388250	388251	two-quartet	+	chr20:388231-388249:+	FALSE	5'- GGAGCCCGAGGAGGGCGGGCGGGCCTAC -3' rG4seq-K -------------------*--------	TRIB3|ENSG00000101255.12	ENST00000217233.9;ENST00000422053.3;ENST00000449710.5;ENST00000615226.4	CDS	88	79	15	5		36	28	8	2
chr20	397471	397473	bulges	+	chr20:397433-397472:+	FALSE	5'- GGAAAGTCCCAGGTGGGACTCTTCTGGGGACACTTGGGGTCCACAATCC -3' rG4seq-K --------------------------------------**---------	TRIB3|ENSG00000101255.12	ENST00000217233.9	3UTR	173	84	39	4		51	23	31	7
chr20	18530696	18530697	two-quartet	+	chr20:18527609-18527611:+,chr20:18530679-18530697:+	TRUE	5'- GGAGGCTACATGGTAATGGGAGATTCTTTC -3' rG4seq-K -------------------*----------	SEC23B|ENSG00000101310.17	ENST00000262544.6;ENST00000336714.8;ENST00000377465.6;ENST00000643747.1;ENST00000650089.1	CDS	69	45	26	8		27	19	35	7
chr20	58891467	58891468	two-quartet	+	chr20:58891444-58891467:+	FALSE	5'- GGTCCGCCTCGGCCCGGCGGCGGCCATCAGCCC -3' rG4seq-K -----------------------*---------	GNAS|ENSG00000087460.29	ENST00000265620.11;ENST00000306090.12;ENST00000313949.11;ENST00000349036.9;ENST00000354359.12;ENST00000371075.7;ENST00000371085.8;ENST00000371095.7;ENST00000371098.6;ENST00000371100.9;ENST00000371102.8;ENST00000419558.7;ENST00000423897.7;ENST00000453292.7;ENST00000461152.6;ENST00000462499.6;ENST00000464624.7;ENST00000464788.6;ENST00000464960.5;ENST00000467227.6;ENST00000467321.6;ENST00000469431.6…	5UTR	51	31	18	0		14	10	24	5
chr22	45186931	45186933	two-quartet	+	chr22:45186910-45186932:+	FALSE	5'- GGGGCACGGGGCCCCTGGAGGGCTTCCCTACT -3' rG4seq-K ---------------------**---------	NUP50|ENSG00000093000.19	ENST00000347635.9	3UTR	187	145	60	25		63	49	54	16
chr3	184183948	184183949	two-quartet	+	chr3:184183932-184183948:+	FALSE	5'- GGAGTGGGAGGGTTGGTTGCCCCTCA -3' rG4seq-K ----------------*---------	AP2M1|ENSG00000161203.14	ENST00000292807.9;ENST00000382456.7;ENST00000427072.6;ENST00000431779.6;ENST00000439647.5;ENST00000442686.2;ENST00000448139.6;ENST00000455925.2;ENST00000460862.6;ENST00000461733.6;ENST00000466598.6;ENST00000468048.6;ENST00000480260.2;ENST00000484469.6;ENST00000487958.6;ENST00000684853.1;ENST00000685290.1;ENST00000685698.1;ENST00000686364.1;ENST00000686942.1;ENST00000687623.1;ENST00000688579.1;ENS…	3UTR	160	147	16	8		46	39	24	11
chr4	6693916	6693917	two-quartet	+	chr4:6693904-6693917:+	FALSE	5'- GGAGGAAGGTGGGTCTGAATCTA -3' rG4seq-K ------------*----------	S100P|ENSG00000163993.7	ENST00000296370.4;ENST00000513778.1	5UTR	224	208	42	22		75	71	40	25
chr4	74387249	74387250	potential G-quadruplex & G>=40%	+	chr4:74387190-74387250:+	FALSE	5'- ACATCTGTGCCCGATTTTAGTATGTGCAGGGGGGCGATCTGGGAATCAGTCCCCTGTGGATACCAAGGTA -3' rG4seq-K -----------------------------------------------------------*----------	EREG|ENSG00000124882.4	ENST00000244869.3	3UTR	88	30	27	2		22	9	31	2
chr4	176332084	176332085	bulges	+	chr4:176332065-176332084:+	FALSE	5'- GGGGGTGGGATGGGGGAGGTTAGTTACAC -3' rG4seq-K -------------------*---------	SPCS3|ENSG00000129128.13	ENST00000503362.2	3UTR	63	42	19	6		23	18	31	13
chr5	75359523	75359524	two-quartet	+	chr5:75359505-75359523:+	FALSE	5'- GGAACGGTGGGTGGTGGGACCAACCTAC -3' rG4seq-K ------------------*---------	HMGCR|ENSG00000113161.17	ENST00000287936.9;ENST00000343975.9;ENST00000509085.5;ENST00000511206.5;ENST00000511986.1;ENST00000514315.2;ENST00000679456.1;ENST00000680160.1;ENST00000680940.1;ENST00000681271.1;ENST00000681410.1;ENST00000681567.1	3UTR;CDS	36	31	11	4		12	9	7	1
chr5	154814354	154814357	bulges	+	chr5:154814337-154814358:+	FALSE	5'- GGGGGGAGGGAAAGGGGGGAGATTTTTATAT -3' rG4seq-K -----------------*-*-----------	LARP1|ENSG00000155506.19	ENST00000336314.9;ENST00000518297.6;ENST00000685355.1;ENST00000685946.1;ENST00000687700.1;ENST00000688232.1;ENST00000690816.1	3UTR	133	56	49	11		61	26	64	20
chr5	179821061	179821062	two-quartet	+	chr5:179821034-179821061:+	FALSE	5'- GGAAGCCGAGGCTGCGGCGGGTCCGGGACCCTGCGAG -3' rG4seq-K ---------------------------*---------	SQSTM1|ENSG00000161011.20	ENST00000389805.9;ENST00000422245.5;ENST00000453046.5;ENST00000464493.5;ENST00000481335.5;ENST00000504627.1;ENST00000508284.5;ENST00000510187.5;ENST00000514093.5;ENST00000626660.1	CDS	97	41	42	7		23	12	38	6
chr5	179824041	179824043	two-quartet	+	chr5:179824020-179824042:+	FALSE	5'- GGGAAAGGGCTTGCACCGGGGGCACACCAAGC -3' rG4seq-K ---------------------**---------	SQSTM1|ENSG00000161011.20	ENST00000360718.5;ENST00000389805.9;ENST00000422245.5;ENST00000464493.5;ENST00000466342.1;ENST00000485412.1;ENST00000504627.1;ENST00000508284.5;ENST00000510187.5;ENST00000514093.5	3UTR;CDS	451	230	143	37		119	62	148	42
chr5	179833744	179833746	potential G-quadruplex & G>=40%	+	chr5:179833686-179833746:+	FALSE	5'- AGATGCCAGAATCCGAAGGGCCAAGCTCTCTGGACCCCTCCCAGGAGGGACCCACAGGGCTGAAGGAAGC -3' rG4seq-K ----------------------------------------------------------**----------	SQSTM1|ENSG00000161011.20	ENST00000360718.5;ENST00000389805.9;ENST00000510187.5	CDS	259	122	132	12		73	31	130	15
chr5	179836824	179836825	bulges	+	chr5:179836793-179836824:+	FALSE	5'- GGGTGCCCTGGCTCCTTGCAGCAGGGCTGGGCCTGCGAGAC -3' rG4seq-K -------------------------------*---------	SQSTM1|ENSG00000161011.20	ENST00000360718.5;ENST00000389805.9;ENST00000510187.5	3UTR	141	88	35	9		51	36	46	10
chr5	179837961	179837962	potential G-quadruplex & G>=40%	+	chr5:179837902-179837962:+	FALSE	5'- CATGCCCTCCATGTGTAAGAACAATGCCAGGGCCCAGGAGGACCGCCTGCCCTGCCTGGGCCTTGGCTGG -3' rG4seq-K -----------------------------------------------------------*----------	SQSTM1|ENSG00000161011.20	ENST00000389805.9	3UTR	208	171	67	29		71	60	87	40
chr6	29942757	29942758	potential G-quadruplex & G>=40%	+	chr6:29942698-29942758:+	FALSE	5'- CCGGGGGAGCCGCGCCGGGACGAGGGTCGGGCAGGTCTCAGCCACTGCTCGCCCCCAGGCTCCCACTCCA -3' rG4seq-K -----------------------------------------------------------*----------	HLA-A|ENSG00000206503.13	ENST00000376802.2;ENST00000376806.9;ENST00000376809.10;ENST00000396634.5;ENST00000461903.1;ENST00000479320.5;ENST00000495183.5;ENST00000496081.5;ENST00000638375.1	CDS	56	43	18	5		26	19	29	8
chr6	32972469	32972470	two-quartet	+	chr6:32972458-32972469:+	FALSE	5'- GGAGGCGGCGGCTCCCTAAAC -3' rG4seq-K -----------*---------	BRD2|ENSG00000204256.14	ENST00000374825.9;ENST00000374831.8;ENST00000449085.4;ENST00000456339.5;ENST00000464592.6;ENST00000469132.2;ENST00000482914.5;ENST00000495733.5;ENST00000607833.5;ENST00000677085.1;ENST00000677331.1;ENST00000678250.1;ENST00000678778.1;ENST00000679099.1;ENST00000679179.1	5UTR	344	291	92	59		92	79	93	51
chr6	36481747	36481748	potential G-quadruplex & G>=40%	+	chr6:36481688-36481748:+	FALSE	5'- GCTGACGGATGAGGATTCTGTGGACTGGGATGAAGACCACCCTCCACCAATGGGGGAGGAATATTCCCAA -3' rG4seq-K -----------------------------------------------------------*----------	KCTD20|ENSG00000112078.14	ENST00000265344.8;ENST00000373731.7;ENST00000449081.6;ENST00000474988.5;ENST00000481911.5;ENST00000536244.5	3UTR;CDS	31	21	9	1		10	6	8	0
chr6	36686108	36686109	two-quartet	+	chr6:36686090-36686108:+	FALSE	5'- GGAGGTTGGGTGGGCCGGCTTCATGCCA -3' rG4seq-K ------------------*---------	CDKN1A|ENSG00000124762.14	ENST00000244741.10;ENST00000405375.5;ENST00000448526.6;ENST00000615513.4	3UTR	302	202	76	24		90	60	65	15
chr6	132814607	132814608	two-quartet	+	chr6:132814596-132814607:+	FALSE	5'- GGAGGCGGAGGCTTGGGTGCG -3' rG4seq-K -----------*---------	RPS12|ENSG00000112306.8	ENST00000230050.4;ENST00000484616.2	5UTR	151	114	30	7		39	32	39	18
chr7	73831737	73831739	potential G-quadruplex & G>=40%	+	chr7:73831679-73831739:+	FALSE	5'- TGGGTGCCTCGCTCTACGTCGGCTGGGCCGCCTCCGGCCTGCTGCTCCTTGGCGGGGGGCTGCTTTGCTG -3' rG4seq-K ----------------------------------------------------------**----------	CLDN4|ENSG00000189143.10	ENST00000340958.4;ENST00000431918.1;ENST00000435050.1	CDS	347	147	99	12		124	41	113	15
chr7	73832545	73832546	two-quartet	+	chr7:73832530-73832545:+	FALSE	5'- GGGAGGGTGGCAGGGAGGAGGGGAC -3' rG4seq-K ---------------*---------	CLDN4|ENSG00000189143.10	ENST00000340958.4;ENST00000431918.1;ENST00000435050.1	3UTR	357	306	93	25		112	84	104	31
chr7	116258394	116258395	potential G-quadruplex & G>=40%	+	chr7:116258335-116258395:+	FALSE	5'- CTGACCTCAGATGATCCGCCTGCCTTGGCCTCCCAAAGTGCTGGGATTACAGGTGTGGGAGCCACCATGC -3' rG4seq-K -----------------------------------------------------------*----------	TES|ENSG00000135269.18	ENST00000358204.9;ENST00000393481.6	3UTR	76	22	27	1		22	12	19	3
chr7	143382412	143382413	two-quartet	+	chr7:143382401-143382412:+	FALSE	5'- GGAGGAGGAGGGAGGGCCTGA -3' rG4seq-K -----------*---------	ZYX|ENSG00000159840.16	ENST00000322764.10;ENST00000354434.8;ENST00000392910.6;ENST00000449630.5;ENST00000457235.5;ENST00000468083.1;ENST00000477373.1	5UTR;CDS	55	48	32	16		15	12	42	15
chr7	143382417	143382418	two-quartet	+	chr7:143382401-143382417:+	FALSE	5'- GGAGGAGGAGGGAGGGCCTGAGGCCC -3' rG4seq-K ----------------*---------	ZYX|ENSG00000159840.16	ENST00000322764.10;ENST00000354434.8;ENST00000392910.6;ENST00000449630.5;ENST00000457235.5;ENST00000468083.1;ENST00000477373.1	5UTR;CDS	127	64	38	5		38	19	38	2
chr7	143391025	143391027	potential G-quadruplex & G>=40%	+	chr7:143390967-143391027:+	FALSE	5'- ACCCGCGCCCTCGGCCGGCCCCCCGAGCAGCCTTTGTACTCTGCTTGCGGAGGGCTGGGAGACCCTCCAG -3' rG4seq-K ----------------------------------------------------------**----------	ZYX|ENSG00000159840.16	ENST00000322764.10;ENST00000354434.8;ENST00000392910.6	3UTR	70	40	35	7		31	17	39	4
chr7	143391038	143391039	potential G-quadruplex & G>=40%	+	chr7:143390979-143391039:+	FALSE	5'- GGCCGGCCCCCCGAGCAGCCTTTGTACTCTGCTTGCGGAGGGCTGGGAGACCCTCCAGGACATTCCCACC -3' rG4seq-K -----------------------------------------------------------*----------	ZYX|ENSG00000159840.16	ENST00000322764.10;ENST00000354434.8;ENST00000392910.6	3UTR	210	133	52	3		64	32	47	4
chr7	155297945	155297946	two-quartet	+	chr7:155297927-155297945:+	FALSE	5'- GGAGAGCCGGCGGGCGGGCGCCTCTCGG -3' rG4seq-K ------------------*---------	INSIG1|ENSG00000186480.13	ENST00000340368.9;ENST00000342407.5;ENST00000344756.8;ENST00000425172.1	5UTR	206	144	80	4		76	53	108	13
chr7	155308537	155308538	two-quartet	+	chr7:155308513-155308537:+	FALSE	5'- GGCTACGTGGGTTCAGGCAGGTGGCAGCTTCCCA -3' rG4seq-K ------------------------*---------	INSIG1|ENSG00000186480.13	ENST00000340368.9;ENST00000342407.5;ENST00000344756.8;ENST00000476756.1	3UTR	150	75	34	7		49	32	42	13
chr8	23571572	23571573	two-quartet	+	chr8:23571558-23571574:+	FALSE	5'- GGCGGGCTGGCCGGGGCCCTCGCCGC -3' rG4seq-K --------------*-----------	SLC25A37|ENSG00000147454.14	ENST00000290075.10;ENST00000518881.5;ENST00000519973.6;ENST00000521637.1;ENST00000522164.5;ENST00000523883.5;ENST00000523930.1	3UTR;CDS	39	35	7	3		8	8	6	1
chr9	128107890	128107891	two-quartet	+	chr9:128107872-128107890:+	FALSE	5'- GGTAAGGTGGGAGGAGGGCTACAGCCCA -3' rG4seq-K ------------------*---------	SLC25A25|ENSG00000148339.13	ENST00000373064.9;ENST00000373066.9;ENST00000373068.6;ENST00000373069.10;ENST00000432073.6;ENST00000682371.1;ENST00000682638.1;ENST00000683206.1	3UTR	219	165	44	10		56	42	36	4
chr9	137242690	137242691	potential G-quadruplex & G>=40%	+	chr9:137242631-137242691:+	FALSE	5'- CCTGGGTGGGGGGACTGGGTCTGGGATGGGTACCCTCCTCATCAGCAAGATCCGGGAGGAGTACCCAGAC -3' rG4seq-K -----------------------------------------------------------*----------	TUBB4B|ENSG00000188229.6	ENST00000340384.5;ENST00000604929.1	CDS	107	61	22	4		30	20	21	6
chrM	6271	6272	two-quartet	+	chrM:6256-6271:+	FALSE	5'- GGAGGCCGGAGCAGGAACAGGTTGA -3' rG4seq-K ---------------*---------	MT-CO1|ENSG00000198804.2	ENST00000361624.2	CDS	609	205	256	39		166	50	239	34
chrM	8166	8167	potential G-triplex & G>=40%	+	chrM:8107-8167:+	FALSE	5'- ATTCCCGGACGTCTAAACCAAACCACTTTCACCGCTACACGACCGGGGGTATACTACGGTCAATGCTCTG -3' rG4seq-K -----------------------------------------------------------*----------	MT-CO2|ENSG00000198712.1	ENST00000361739.1	CDS	661	193	408	52		200	72	484	58
NC_006213.1	859	861	two-quartet	+	NC_006213.1:835-860:+	FALSE	5'- GGTGCAGGTCAATTCGTGGGTTGGGTCATACCCTT -3' rG4seq-K ------------------------**---------	4933401J01Rik|ENSMUSG00000102693.1	ENSMUST00000193812.1	non_coding	7368	1450	3106	256		2129	442	3368	272
NC_006213.1	1701	1702	two-quartet	+	NC_006213.1:1684-1701:+	FALSE	5'- GGCTATGGTGGTTTTGGTTGTAAAGAT -3' rG4seq-K -----------------*---------	4933401J01Rik|ENSMUSG00000102693.1	ENSMUST00000193812.1	non_coding	2074	353	807	99		797	141	981	123
NC_006213.1	4275	4276	two-quartet	+	NC_006213.1:4252-4275:+	FALSE	5'- GGCCATATGGCACATGGTGGTGGTGTTGCAAAA -3' rG4seq-K -----------------------*---------	4933401J01Rik|ENSMUSG00000102693.1	ENSMUST00000193812.1	non_coding	178	104	59	17		56	24	46	6
NC_006213.1	7641	7642	two-quartet	+	NC_006213.1:7623-7641:+	FALSE	5'- GGCTAATGGTGGCACTGGCTTTTGTTCA -3' rG4seq-K ------------------*---------	4933401J01Rik|ENSMUSG00000102693.1	ENSMUST00000193812.1	non_coding	313	139	127	25		98	44	134	23
NC_006213.1	15237	15239	potential G-quadruplex & G>=40%	+	NC_006213.1:15179-15239:+	FALSE	5'- AGCAGCTACACGTGGTGTTCCTGTAGTTATAGGCACCACTAAATTTTATGGTGGCTGGGATGATATGTTA -3' rG4seq-K ----------------------------------------------------------**----------	4933401J01Rik|ENSMUSG00000102693.1	ENSMUST00000193812.1	non_coding	308	82	122	16		94	26	181	26
NC_006213.1	20105	20106	two-quartet	+	NC_006213.1:20082-20105:+	FALSE	5'- GGCGTAGTGGTGGACAAGGTTGGAGACACTGAT -3' rG4seq-K -----------------------*---------	4933401J01Rik|ENSMUSG00000102693.1	ENSMUST00000193812.1	non_coding	187	108	64	14		58	32	61	18
NC_006213.1	25025	25027	potential G-quadruplex & G>=40%	+	NC_006213.1:24967-25027:+	FALSE	5'- ATAGATAAGTTTGCTATACCCAATGGCAGGAAGGTTGACCTACAATTGGGTAATTTGGGCTATTTGCAGT -3' rG4seq-K ----------------------------------------------------------**----------	4933401J01Rik|ENSMUSG00000102693.1	ENSMUST00000193812.1	non_coding	1762	389	852	96		612	145	911	115
NC_006213.1	27685	27686	potential G-quadruplex & G>=40%	+	NC_006213.1:27626-27686:+	FALSE	5'- TCAATCTCAAGGACATTGGTACATATGAATATTATGTAAAATGGCCTTGGTATGTATGGCTTTTAATCTG -3' rG4seq-K -----------------------------------------------------------*----------	4933401J01Rik|ENSMUSG00000102693.1	ENSMUST00000193812.1	non_coding	910	189	452	58		320	77	423	56
NC_006213.1	27783	27784	potential G-quadruplex & G>=40%	+	NC_006213.1:27724-27784:+	FALSE	5'- CTATTCTTCATATGCTGTTGTACAGGATGTGGGACTAGTTGTTTTAAGAAATGTGGTGGTTGTTGTGATG -3' rG4seq-K -----------------------------------------------------------*----------	4933401J01Rik|ENSMUSG00000102693.1	ENSMUST00000193812.1	non_coding	284	70	116	12		94	25	116	12
NC_006213.1	29743	29744	potential G-quadruplex & G>=40%	+	NC_006213.1:29684-29744:+	FALSE	5'- ATACCCCGGCTGACATTGTCGATCGGGACCCAAGTAGCGATGAGGCTATTCCGACTAGGTTTCCGCCTGG -3' rG4seq-K -----------------------------------------------------------*----------	4933401J01Rik|ENSMUSG00000102693.1	ENSMUST00000193812.1	non_coding	9295	1763	4139	559		2888	569	4370	536
NC_006213.1	30111	30112	potential G-quadruplex & G>=40%	+	NC_006213.1:30052-30112:+	FALSE	5'- CAATGCACTGTTCAGCAGTGTTTTGGTAAGAGAGGCCCTAATCAGAATTTTGGTGGTGGAGAAATGTTAA -3' rG4seq-K -----------------------------------------------------------*----------	4933401J01Rik|ENSMUSG00000102693.1	ENSMUST00000193812.1	non_coding	4473	2175	1524	335		1378	621	1552	368
NC_006213.1	30129	30130	potential G-quadruplex & G>=40%	+	NC_006213.1:30070-30130:+	FALSE	5'- TGTTTTGGTAAGAGAGGCCCTAATCAGAATTTTGGTGGTGGAGAAATGTTAAAACTTGGAACTAGTGACC -3' rG4seq-K -----------------------------------------------------------*----------	4933401J01Rik|ENSMUSG00000102693.1	ENSMUST00000193812.1	non_coding	17814	4929	8397	1886		5437	1525	8250	1890
chr1	8012549	8012550	potential G-quadruplex & G>=40%	-	chr1:8012549-8012609:-	FALSE	5'- TACCAAGGCCTCATACTTCCAGGTTTCATGTTGCGTCTTGTTGAGGGAGGGAGAGCAGGTTACTTGGCAA -3' rG4seq-K -----------------------------------------------------------*----------	ERRFI1|ENSG00000116285.13	ENST00000377482.10;ENST00000474874.5	3UTR	83	36	44	7		24	18	33	5
chr1	8012633	8012634	potential G-quadruplex & G>=40%	-	chr1:8012633-8012693:-	FALSE	5'- CATTTATTTTTGCAGGCAATCTTTTCCATGGAGGGCAGGGTATCCATTCTTTACCATGGGTGTACCTGCT -3' rG4seq-K -----------------------------------------------------------*----------	ERRFI1|ENSG00000116285.13	ENST00000377482.10;ENST00000474874.5	3UTR	248	170	87	35		74	46	83	27
chr1	8012959	8012960	bulges	-	chr1:8012960-8012984:-	FALSE	5'- GATGGTGGGGAGGGGAGGATGGGGAAGCTTTTTA -3' rG4seq-K ------------------------*---------	ERRFI1|ENSG00000116285.13	ENST00000377482.10;ENST00000474874.5	3UTR	636	338	206	63		204	109	205	63
chr1	36341678	36341679	two-quartet	-	chr1:36341679-36341700:-	FALSE	5'- GGCGTGGCTGTCAGGGCTGGGCCCTGTAGTG -3' rG4seq-K ---------------------*---------	STK40|ENSG00000196182.11	ENST00000359297.6;ENST00000373129.7;ENST00000373130.7;ENST00000373132.4	3UTR	34	23	11	1		7	5	11	0
chr1	45511293	45511294	potential G-quadruplex & G>=40%	-	chr1:45511293-45511353:-	FALSE	5'- AGAATATTTCTCCAAGCAGAAGTGAGCGCTGGGCTGTTTTAGTGCCAGGCTGCGGTGGGCAGCCATGAGA -3' rG4seq-K -----------------------------------------------------------*----------	PRDX1|ENSG00000117450.15	ENST00000262746.5;ENST00000319248.13;ENST00000372079.1;ENST00000424390.2;ENST00000447184.6;ENST00000676549.1	3UTR;CDS	80	49	30	5		30	18	30	1
chr1	150574824	150574825	potential G-quadruplex & G>=40%	-	chr1:150574824-150574884:-	FALSE	5'- TGGTCTAAGTGCTGACTGGCTACGTAGTTCGGGCAAATCCTCCAAAAGGGAAAGGGAGGATTTGCTTAGA -3' rG4seq-K -----------------------------------------------------------*----------	MCL1|ENSG00000143384.14	ENST00000369026.3;ENST00000464132.2;ENST00000620947.4;ENST00000676522.1;ENST00000678610.1;ENST00000678770.1	3UTR	31	25	10	0		14	11	13	0
chr1	150579538	150579539	two-quartet	-	chr1:150579539-150579550:-	FALSE	5'- GGCGGCGGCGGCGACTGGCAA -3' rG4seq-K -----------*---------	MCL1|ENSG00000143384.14	ENST00000369026.3;ENST00000620947.4;ENST00000676522.1;ENST00000678610.1;ENST00000678770.1	5UTR	110	91	16	5		28	24	25	13
chr1	150965619	150965620	two-quartet	-	chr1:150965620-150965634:-	FALSE	5'- GGGTAGGAGGAGGGTGCACATAAC -3' rG4seq-K --------------*---------	CERS2|ENSG00000143418.20	ENST00000271688.10;ENST00000345896.8;ENST00000368954.10;ENST00000482825.7;ENST00000560793.6;ENST00000561294.5	3UTR	114	84	28	7		29	20	20	5
chr1	153534631	153534633	potential G-quadruplex & G>=40%	-	chr1:153534631-153534691:-	FALSE	5'- AAATAGGGAAGATGGAGACACCCTCTGGGGGTCCTCTCTGAGTCAAATCCAGTGGTGGGTAATTGTACAA -3' rG4seq-K ----------------------------------------------------------**----------	S100A6|ENSG00000197956.10	ENST00000368719.9;ENST00000368720.6;ENST00000496817.5	3UTR	317	143	125	38		104	56	130	32
chr1	155479388	155479389	two-quartet	-	chr1:155479389-155479411:-	FALSE	5'- GGCCTCAAAGGGGAGGAGGCGGTTATCTCCTC -3' rG4seq-K ----------------------*---------	ASH1L|ENSG00000116539.14	ENST00000368346.7;ENST00000392403.8;ENST00000548830.2;ENST00000676814.1;ENST00000677042.1;ENST00000677213.1;ENST00000677825.1;ENST00000678117.1;ENST00000678699.1;ENST00000679097.1;ENST00000679133.1;ENST00000679333.1	3UTR;CDS	67	62	12	5		28	28	13	6
chr1	156014969	156014970	two-quartet	-	chr1:156014969-156014985:-	FALSE	5'- GGCCCAGGAGGATGGGCCCGTTGTGA -3' rG4seq-K ---------------*----------	SSR2|ENSG00000163479.14	ENST00000295702.9;ENST00000368311.5;ENST00000466905.4;ENST00000472898.5;ENST00000473699.5;ENST00000474377.5;ENST00000480176.5;ENST00000480567.5;ENST00000484320.6;ENST00000488179.6;ENST00000496742.5;ENST00000529008.5;ENST00000531790.5;ENST00000531917.5;ENST00000532074.5	CDS	52	30	15	0		22	12	15	2
chr1	156643955	156643956	potential G-quadruplex & G>=40%	-	chr1:156643955-156644015:-	FALSE	5'- ACTCAGACTTCCCCACATCCGGTACCAGCCTCAGAACCCAGGGGTCCAGGGTTCTGTGGCCTTCTCTATC -3' rG4seq-K -----------------------------------------------------------*----------	ENSG00000272405|ENSG00000272405.1	ENST00000605886.1	non_coding	78	45	30	8		21	11	21	3
chr1	159918648	159918649	potential G-quadruplex & G>=40%	-	chr1:159918648-159918708:-	FALSE	5'- AGCTCTCAAGCTCCTTTCTGTCAGGGTGGGGGGTTCAGCCTGTCCTGTCACCTCTGAGGTGCCTGCTGGC -3' rG4seq-K -----------------------------------------------------------*----------	TAGLN2|ENSG00000158710.15	ENST00000368096.5;ENST00000368097.9	3UTR	84	57	17	2		27	22	24	3
chr1	161171934	161171935	bulges	-	chr1:161171935-161171970:-	FALSE	5'- GGACTGACCCTCGGGGTCCTCGGGCTCCTTCTGGGCCACGTTACC -3' rG4seq-K -----------------------------------*---------	B4GALT3|ENSG00000158850.15	ENST00000319769.10;ENST00000367998.5;ENST00000470882.5;ENST00000486938.1;ENST00000622395.4	CDS	47	35	10	1		12	9	15	2
chr10	3778951	3778952	bulges	-	chr10:3778950-3778974:-	FALSE	5'- GTGGCGAGTGGTGTGGGGAGGGAGAGCCTCTCTC -3' rG4seq-K ----------------------*-----------	KLF6|ENSG00000067082.15	ENST00000461124.1;ENST00000497571.6;ENST00000542957.1	3UTR	134	83	35	6		62	34	45	10
chr11	62625652	62625653	bulges	-	chr11:62625653-62625680:-	FALSE	5'- GGGCAGGATGAGAGGGCTGACCCTGGGCTCCAAATTC -3' rG4seq-K ---------------------------*---------	GANAB|ENSG00000089597.18	ENST00000346178.8;ENST00000356638.8;ENST00000532402.5;ENST00000540933.5;ENST00000648273.1	3UTR	71	44	18	5		29	22	13	2
chr11	64765871	64765872	bulges	-	chr11:64765872-64765890:-	FALSE	5'- GGGCATGGGGGTGGCGGGCATGCCGCCC -3' rG4seq-K ------------------*---------	SF1|ENSG00000168066.21	ENST00000227503.13;ENST00000334944.9;ENST00000377387.5;ENST00000377390.8;ENST00000377394.7;ENST00000413725.5;ENST00000433274.6;ENST00000443908.5;ENST00000448404.5;ENST00000681407.1	3UTR;CDS	33	23	8	1		10	8	15	2
chr11	119045509	119045511	two-quartet	-	chr11:119045509-119045524:-	FALSE	5'- GGGTTGGGGGAGGGGTTGGTCCTGC -3' rG4seq-K -------------**----------	HYOU1|ENSG00000149428.20	ENST00000532519.6;ENST00000612687.4;ENST00000614711.4;ENST00000617285.5;ENST00000621959.4;ENST00000652093.1	3UTR	108	72	57	18		41	27	90	30
chr12	52904798	52904799	bulges	-	chr12:52904796-52904831:-	FALSE	5'- GGCGGCGGCTATGGTGGGGCCAGCGGCATGGGAGGCATCACCGCA -3' rG4seq-K --------------------------------*------------	KRT8|ENSG00000170421.13	ENST00000293308.11;ENST00000546542.1;ENST00000546583.5;ENST00000546826.5;ENST00000546897.5;ENST00000548998.5;ENST00000550170.5;ENST00000552150.5;ENST00000552551.5;ENST00000692008.1	CDS	72	36	15	2		22	13	20	4
chr12	76029664	76029666	two-quartet	-	chr12:76029665-76029679:-	FALSE	5'- GGGCGGTGGAGGGGAAAACATTAA -3' rG4seq-K -------------**---------	PHLDA1|ENSG00000139289.14	ENST00000266671.10;ENST00000602540.5;ENST00000619060.1	3UTR	711	303	366	70		242	103	430	76
chr12	93409641	93409642	potential G-quadruplex & G>=40%	-	chr12:93409641-93409701:-	FALSE	5'- TTTTTATTTTATTTTATTTTATTTTATTTTTGAGGGGGGAGGTAGTTTAATTTTATGGGCTCCTTTCCCC -3' rG4seq-K -----------------------------------------------------------*----------	UBE2N|ENSG00000177889.10	ENST00000318066.7;ENST00000550657.1	3UTR	64	36	15	1		26	19	16	2
chr15	59657421	59657422	potential G-quadruplex & G>=40%	-	chr15:59657421-59657481:-	FALSE	5'- TCGGAGAAGTAGGAACCTCCTGCCGGGCTCGTGGCGGCTTCTGTCCGCTCCGCGGAGGGAAGCGCCTTCC -3' rG4seq-K -----------------------------------------------------------*----------	ENSG00000227161|ENSG00000227161.1;GTF2A2|ENSG00000140307.11	ENST00000267869.8;ENST00000396060.7;ENST00000396061.5;ENST00000396063.5;ENST00000396064.7;ENST00000441746.1;ENST00000472508.1;ENST00000480768.1;ENST00000484743.5;ENST00000559141.1;ENST00000559706.1	5UTR;non_coding	50	33	10	1		8	6	9	1
chr15	74844909	74844910	two-quartet	-	chr15:74844910-74844928:-	FALSE	5'- GGAACGGGAGGGACAGGGAATTTTTTCC -3' rG4seq-K ------------------*---------	SCAMP2|ENSG00000140497.16	ENST00000268099.13;ENST00000563663.5;ENST00000563829.5;ENST00000566480.5	3UTR	74	69	10	6		24	18	6	1
chr16	4803769	4803770	two-quartet	-	chr16:4803769-4803791:-	FALSE	5'- GGGTGGCCACACTAGGGCGGGGTCCTTCCCCC -3' rG4seq-K ---------------------*----------	GLYR1|ENSG00000140632.17	ENST00000321919.14;ENST00000436648.9;ENST00000587936.5;ENST00000588732.5;ENST00000589389.5	3UTR	52	50	7	2		27	25	8	3
chr16	75235041	75235042	two-quartet	-	chr16:75235042-75235060:-	FALSE	5'- GGGGCCTGAGGGGGGTGGCACCCTGCAC -3' rG4seq-K ------------------*---------	BCAR1|ENSG00000050820.17	ENST00000162330.10;ENST00000393420.10;ENST00000393422.6;ENST00000418647.7;ENST00000420641.7;ENST00000535626.6;ENST00000538440.6;ENST00000542031.6;ENST00000562556.5;ENST00000563038.5;ENST00000566982.1	3UTR;CDS	31	26	9	3		10	8	11	2
chr16	87830486	87830487	bulges	-	chr16:87830487-87830523:-	FALSE	5'- GCTGGAATTCCACAGGGACCAGGGCCACCGCAGGGGACTGTCTCAG -3' rG4seq-K ------------------------------------*---------	SLC7A5|ENSG00000103257.9	ENST00000261622.5;ENST00000565644.5	3UTR	40	21	11	0		11	7	6	0
chr17	1464251	1464252	potential G-triplex & G>=40%	-	chr17:1464251-1464311:-	FALSE	5'- CCTGCTCCTACCCTCAAGGGCCTGGGGGCTGCCCAGCTGCCTCTATGCCCTTCTGGGGGTCTCAGCCCAC -3' rG4seq-K -----------------------------------------------------------*----------	MYO1C|ENSG00000197879.17	ENST00000361007.7;ENST00000575158.5;ENST00000648446.1;ENST00000648651.1	3UTR	40	19	14	0		8	5	8	0
chr17	4945753	4945754	two-quartet	-	chr17:4945754-4945774:-	FALSE	5'- GGGCTGGGGGCCAGGGCTGGATGGACAGAC -3' rG4seq-K --------------------*---------	PFN1|ENSG00000108518.8	ENST00000225655.6;ENST00000574872.1	3UTR	457	321	96	36		121	87	84	43
chr17	4945757	4945759	two-quartet	-	chr17:4945758-4945774:-	FALSE	5'- GGGCTGGGGGCCAGGGCTGGATGGAC -3' rG4seq-K ---------------**---------	PFN1|ENSG00000108518.8	ENST00000225655.6;ENST00000574872.1	3UTR	157	98	73	28		36	25	48	20
chr17	41523671	41523672	canonical/G3L1-7	-	chr17:41523672-41523696:-	FALSE	5'- GGGTAGAGGGATGGGAAGGAAGGGACCCTTACCC -3' rG4seq-K ------------------------*---------	KRT19|ENSG00000171345.13	ENST00000361566.7	3UTR	333	217	86	32		106	63	94	36
chr17	41528121	41528122	two-quartet	-	chr17:41528122-41528136:-	FALSE	5'- GGGGGCTCCGGCGGCCGCGGCGTA -3' rG4seq-K --------------*---------	KRT19|ENSG00000171345.13	ENST00000361566.7;ENST00000455635.1	CDS	110	74	23	3		42	30	27	6
chr17	41755098	41755100	potential G-quadruplex & G>=40%	-	chr17:41755098-41755158:-	FALSE	5'- CTCCAGCCTCCCTGTCTCCAGCTGCCTGGGCCCGGAAGGGCTTTGGTTCCTTCTCTGGGTCTGATTTTCT -3' rG4seq-K ----------------------------------------------------------**----------	JUP|ENSG00000173801.17	ENST00000310706.9;ENST00000393930.5;ENST00000393931.8	3UTR	162	87	46	6		47	25	61	4
chr17	44319844	44319845	potential G-quadruplex & G>=40%	-	chr17:44319844-44319904:-	FALSE	5'- GGCTTGTTTCCCTTCCCTCCCGGCGACAAGCTCCAGGGCAGGGCTGTCCCTCTGGGCGGCCCAGCACTTC -3' rG4seq-K -----------------------------------------------------------*----------	SLC25A39|ENSG00000013306.16	ENST00000225308.12;ENST00000377095.10;ENST00000537904.6;ENST00000586016.5;ENST00000590194.5;ENST00000591006.5;ENST00000592372.5;ENST00000593166.1	3UTR	167	100	31	2		38	20	30	3
chr17	81511439	81511440	two-quartet	-	chr17:81511439-81511456:-	FALSE	5'- GGACCTGGCTGGCCGGGACCTGACCGA -3' rG4seq-K ----------------*----------	ACTG1|ENSG00000184009.13	ENST00000570382.2;ENST00000571691.6;ENST00000571721.6;ENST00000572105.7;ENST00000573283.7;ENST00000574671.6;ENST00000575087.5;ENST00000575659.6;ENST00000575842.5;ENST00000575994.6;ENST00000576209.5;ENST00000576214.3;ENST00000576544.6;ENST00000576917.5;ENST00000615544.5;ENST00000644774.2;ENST00000679410.1;ENST00000679480.1;ENST00000679535.1;ENST00000679778.1;ENST00000680227.1;ENST00000680727.1;ENS…	3UTR;CDS	490	399	170	77		166	121	163	69
chr19	2430750	2430751	potential G-quadruplex & G>=40%	-	chr19:2430750-2430810:-	FALSE	5'- TTCTAAGCGAACTGCCAGAACGTGTGGGTGGGTCTCCCCCAGCCCTCCCTCCTGGCGGGTCTCCTCCAGC -3' rG4seq-K -----------------------------------------------------------*----------	LMNB2|ENSG00000176619.13	ENST00000325327.4;ENST00000475819.1;ENST00000532465.1	3UTR	62	38	19	4		24	14	18	3
chr19	3976620	3976621	two-quartet	-	chr19:3976621-3976632:-	FALSE	5'- GGTGGTGGCGGAGACCCGCAA -3' rG4seq-K -----------*---------	EEF2|ENSG00000167658.16	ENST00000309311.7;ENST00000600794.1	CDS	120	92	28	10		28	22	20	7
chr19	3980537	3980538	potential G-quadruplex & G>=40%	-	chr19:3980537-3980597:-	FALSE	5'- CTCCACTGGCCTGAAGGTCAGGATCATGGGGCCCAACTATACCCCTGGGAAGAAGGAGGACCTCTACCTG -3' rG4seq-K -----------------------------------------------------------*----------	EEF2|ENSG00000167658.16	ENST00000309311.7	CDS	166	73	57	8		52	28	76	13
chr19	3982371	3982372	longloop	-	chr19:3982372-3982401:-	FALSE	5'- GGGCTTTGGGTCTGGCCTCCACGGGTGGGCCTTCACCCT -3' rG4seq-K -----------------------------*---------	EEF2|ENSG00000167658.16	ENST00000309311.7;ENST00000598436.1	CDS	227	149	49	10		75	53	46	10
chr19	3982815	3982816	two-quartet	-	chr19:3982816-3982842:-	FALSE	5'- GGCGAGGGCGAGAGCGGCCCCATGGGCAACATCATG -3' rG4seq-K --------------------------*---------	EEF2|ENSG00000167658.16	ENST00000309311.7	CDS	148	65	67	10		43	17	58	7
chr19	12796931	12796932	two-quartet	-	chr19:12796932-12796951:-	FALSE	5'- GGGACCCTGGAGGGCTAGGCCAAGGCCTT -3' rG4seq-K -------------------*---------	HOOK2|ENSG00000095066.12;PRDX2|ENSG00000167815.12	ENST00000301522.3;ENST00000334482.9;ENST00000466174.5;ENST00000589765.1	3UTR;non_coding	44	30	8	1		9	7	8	1
chr19	18280101	18280102	two-quartet	-	chr19:18280102-18280122:-	FALSE	5'- GGAAGGGGGCTCCGAGGGGGCGCAGCCTCA -3' rG4seq-K --------------------*---------	JUND|ENSG00000130522.6	ENST00000252818.5;ENST00000600972.1	3UTR	91	57	20	4		37	23	16	3
chr19	46774947	46774948	two-quartet	-	chr19:46774948-46774971:-	FALSE	5'- GGGACTCTGGGGAGAGGCTGAGGACAAATACCT -3' rG4seq-K -----------------------*---------	SLC1A5|ENSG00000105281.12	ENST00000412532.6;ENST00000434726.6;ENST00000542575.6;ENST00000594991.5	3UTR	49	43	7	0		10	9	10	3
chr2	10443301	10443302	two-quartet	-	chr2:10443489-10443493:-,chr2:10443302-10443313:-	TRUE	5'- GGGGGCTGAGGTTGGTTTCAGCATG -3' rG4seq-K ---------------*---------	ODC1|ENSG00000115758.13	ENST00000234111.9;ENST00000405333.5	CDS	48	41	8	1		16	13	10	3
chr2	10448128	10448129	two-quartet	-	chr2:10448129-10448152:-	FALSE	5'- GGGGCTGGCCTGCGGCGCCTGGGCGCTCTGAGA -3' rG4seq-K -----------------------*---------	ODC1|ENSG00000115758.13	ENST00000234111.9;ENST00000446285.5	5UTR	65	41	15	1		24	16	21	5
chr2	55050332	55050333	bulges	-	chr2:55050333-55050365:-	FALSE	5'- GCGGCTCTGAGACGCGGCCCCGGCGGCGGCGGCAGCAGCTGC -3' rG4seq-K --------------------------------*---------	RTN4|ENSG00000115310.19	ENST00000317610.11;ENST00000337526.11;ENST00000357732.8;ENST00000394611.6;ENST00000404909.5;ENST00000427710.5	5UTR	53	42	7	0		16	13	13	3
chr2	105361319	105361320	potential G-quadruplex & G>=40%	-	chr2:105361319-105361379:-	FALSE	5'- CTTTAACTGTAAGAAGTGCTCCCTCTCACTGGTGGGGCGTGGCTTCCTCACAGAGAGGGACGACATCCTG -3' rG4seq-K -----------------------------------------------------------*----------	FHL2|ENSG00000115641.19	ENST00000322142.13;ENST00000344213.9;ENST00000358129.8;ENST00000393352.7;ENST00000393353.7;ENST00000408995.5;ENST00000409177.6;ENST00000409807.5;ENST00000530340.6	3UTR;CDS	68	27	17	1		21	10	31	4
chr2	189771636	189771637	two-quartet	-	chr2:189771637-189771654:-	FALSE	5'- GGAGGGCCAATGGCTGGTCCTTCAAGT -3' rG4seq-K -----------------*---------	ORMDL1|ENSG00000128699.14	ENST00000325795.7;ENST00000392349.9;ENST00000392350.7;ENST00000496543.1	3UTR	21	16	6	0		9	8	6	0
chr20	63564054	63564055	two-quartet	-	chr20:63564055-63564066:-	FALSE	5'- GGCGGCGGGGGCAGTCCCCCC -3' rG4seq-K -----------*---------	HELZ2|ENSG00000130589.16	ENST00000427522.6;ENST00000467148.1	CDS	32	22	7	1		11	9	9	0
chr22	38688998	38688999	potential G-quadruplex & G>=40%	-	chr22:38688998-38689058:-	FALSE	5'- GTCCACTGAAACTGCCCCTCAAAAGGCAGCACTGGATCTGTGTTCGAGAGGTGGGAGGGGCCTACTACAA -3' rG4seq-K -----------------------------------------------------------*----------	JOSD1|ENSG00000100221.11	ENST00000216039.9;ENST00000482442.1;ENST00000545590.1;ENST00000683374.1	CDS	20	17	14	2		9	8	7	1
chr3	49359746	49359747	potential G-quadruplex & G>=40%	-	chr3:49359746-49359806:-	FALSE	5'- TTACTCCGTAACAGATTTTGTTGGCATAGCTCTGGGGTGGGCAGTTTTTTGAAAATGGGCTCAACCAGAA -3' rG4seq-K -----------------------------------------------------------*----------	RHOA|ENSG00000067560.14	ENST00000418115.6;ENST00000422781.6;ENST00000445425.6;ENST00000454011.7;ENST00000676712.2;ENST00000678200.1;ENST00000678921.2;ENST00000679208.1	3UTR	71	36	22	2		16	9	28	2
chr3	50287920	50287922	bulges	-	chr3:50287920-50287945:-	FALSE	5'- GGGCTGTGGGGCAGGCACTAGGGGGCCTTTCCCTT -3' rG4seq-K -----------------------**----------	IFRD2|ENSG00000214706.12	ENST00000417626.8;ENST00000426499.5;ENST00000436390.5;ENST00000474556.5	3UTR	62	30	22	3		17	8	19	1
chr3	128650734	128650735	bulges	-	chr3:128650735-128650758:-	FALSE	5'- GGGACTTGGGCCCCGGCGCCGGGCAGCGCCTCC -3' rG4seq-K -----------------------*---------	RPN1|ENSG00000163902.12	ENST00000296255.8;ENST00000476931.1;ENST00000481168.1;ENST00000495462.5;ENST00000497289.5;ENST00000497415.1	CDS	129	91	43	19		48	31	56	17
chr3	155853718	155853719	two-quartet	-	chr3:155853719-155853742:-	FALSE	5'- GGTATTCCCCTGGGCTTGGCGGGAAGCATCCCA -3' rG4seq-K -----------------------*---------	ENSG00000284952|ENSG00000284952.1;SLC33A1|ENSG00000169359.16	ENST00000359479.7;ENST00000468581.2;ENST00000642438.1;ENST00000643144.2;ENST00000643876.1;ENST00000644094.1;ENST00000644855.1;ENST00000646424.1	CDS	34	32	7	3		15	14	8	3
chr5	6372394	6372395	two-quartet	-	chr5:6372395-6372413:-	FALSE	5'- GGTGGGACTGGGCCCTGGACACACCCCT -3' rG4seq-K ------------------*---------	MED10|ENSG00000133398.4	ENST00000255764.4;ENST00000503112.1	3UTR	68	59	13	3		19	16	9	3
chr5	43290202	43290203	two-quartet	-	chr5:43290203-43290226:-	FALSE	5'- GGAAGGGAAGAATAGGGGCAGGGCATTATTAGG -3' rG4seq-K -----------------------*---------	HMGCS1|ENSG00000112972.15	ENST00000325110.11;ENST00000433297.2	3UTR	63	36	32	8		25	16	22	3
chr5	176392629	176392630	two-quartet	-	chr5:176392630-176392646:-	FALSE	5'- GGCGCTGGGAGGGGGGCCCTCACCCC -3' rG4seq-K ----------------*---------	CLTB|ENSG00000175416.16	ENST00000310418.9;ENST00000345807.7;ENST00000508425.5	3UTR	67	43	16	4		25	17	14	2
chr6	30602885	30602886	two-quartet	-	chr6:30602886-30602909:-	FALSE	5'- GGGGGTCCTGGGGGCCCCAAGGGCATGCAGCAC -3' rG4seq-K -----------------------*---------	PPP1R10|ENSG00000204569.10	ENST00000376511.7	CDS	19	14	8	1		8	6	9	0
chr6	31535069	31535070	two-quartet	-	chr6:31535070-31535083:-	FALSE	5'- GGGGGAGGGCAGGATTTTTCTGC -3' rG4seq-K -------------*---------	ATP6V1G2-DDX39B|ENSG00000254870.5;DDX39B|ENSG00000198563.14	ENST00000376177.6;ENST00000376185.5;ENST00000396172.6;ENST00000427214.5;ENST00000431908.5;ENST00000458640.5;ENST00000462256.5;ENST00000481456.1;ENST00000482195.5;ENST00000484566.5	non_coding	192	166	22	8		56	52	16	3
chr6	131950039	131950041	potential G-quadruplex & G>=40%	-	chr6:131950039-131950099:-	FALSE	5'- CCAGACCACAGAGTGGAGCGCCTGTTCCAAGACCTGTGGGATGGGCATCTCCACCCGGGTTACCAATGAC -3' rG4seq-K ----------------------------------------------------------**----------	CCN2|ENSG00000118523.6	ENST00000367976.4	CDS	73	36	27	5		26	13	27	2
chr6	158766750	158766751	bulges	-	chr6:158766749-158766770:-	FALSE	5'- GGGCTGGGAACCAGGGAGGCGCCCTGGTTTG -3' rG4seq-K -------------------*-----------	EZR|ENSG00000092820.19	ENST00000337147.11;ENST00000367075.4	3UTR	184	166	30	10		51	46	18	8
chr8	100919441	100919442	potential G-triplex & G>=40%	-	chr8:100919441-100919501:-	FALSE	5'- CCTCTCTTCCTCCCCACCCTGAAAAAAATGAGTTCCTATTTTTTCTGGGAGAGGGGGGGATTGATTAGAA -3' rG4seq-K -----------------------------------------------------------*----------	YWHAZ|ENSG00000164924.18	ENST00000353245.7;ENST00000395956.7;ENST00000395957.6;ENST00000395958.6;ENST00000457309.2;ENST00000523848.5	3UTR	33	17	17	0		11	6	24	1
chr8	143915751	143915753	bulges	-	chr8:143915752-143915786:-	FALSE	5'- GGCCTGCACGGTGGGCCTTGCTGGGGACGGGGGGCCCCAGTCAG -3' rG4seq-K ---------------------------------**---------	PLEC|ENSG00000178209.17	ENST00000322810.8;ENST00000345136.8;ENST00000354589.7;ENST00000354958.6;ENST00000356346.7;ENST00000357649.6;ENST00000398774.6;ENST00000436759.6;ENST00000527303.2	3UTR	230	116	43	5		59	26	67	11
chr8	144791381	144791382	two-quartet	-	chr8:144791382-144791406:-	FALSE	5'- GGCAAGCTGGCCCGGGCATCAGGGAACTATGCCA -3' rG4seq-K ------------------------*---------	RPL8|ENSG00000161016.18	ENST00000262584.7;ENST00000394920.6;ENST00000525232.5;ENST00000526668.5;ENST00000527914.5;ENST00000528296.5;ENST00000528957.6;ENST00000529163.5;ENST00000529920.5;ENST00000531975.5;ENST00000532702.1;ENST00000533397.5	CDS	240	126	63	15		56	31	39	11
chr9	35056706	35056707	two-quartet	-	chr9:35056706-35056723:-	FALSE	5'- GGGTAGGTGGGTAGGGGCCACAGTTGC -3' rG4seq-K ----------------*----------	VCP|ENSG00000165280.18	ENST00000358901.11;ENST00000417448.2;ENST00000448530.6;ENST00000676836.2;ENST00000677257.1;ENST00000678018.1;ENST00000678465.1;ENST00000678650.1;ENST00000679204.2;ENST00000679599.1;ENST00000679647.1;ENST00000679800.1;ENST00000679862.1;ENST00000679902.1;ENST00000680916.1;ENST00000681335.1;ENST00000681537.1;ENST00000681690.1	3UTR	85	75	27	8		19	19	38	17
chr9	35657832	35657834	bulges	-	chr9:35657831-35657850:-	FALSE	5'- GCGGCGTGGCGCGGGGGCGTCATCCGTCA -3' rG4seq-K ----------------**-----------	RMRP|ENSG00000269900.3;RMRP|ENSG00000277027.1	ENST00000363046.1;ENST00000602361.1	non_coding	369	175	97	16		117	47	95	17
chr9	125239252	125239253	potential G-quadruplex & G>=40%	-	chr9:125239252-125239312:-	FALSE	5'- TATGGCCTGGATAAGAGGGAGGGGGAGAAGAACATCCTGGTGTTTGACCTGGGTGGCGGAACCTTCGATG -3' rG4seq-K -----------------------------------------------------------*----------	HSPA5|ENSG00000044574.9	ENST00000324460.7;ENST00000679355.1;ENST00000679475.1;ENST00000680032.1;ENST00000680234.1;ENST00000680257.1;ENST00000680272.1;ENST00000680494.1;ENST00000680640.1;ENST00000681045.1;ENST00000681424.1;ENST00000681540.1;ENST00000681544.1;ENST00000681675.1;ENST00000681774.1	CDS	189	79	59	13		46	23	50	5
chr9	127451379	127451380	two-quartet	-	chr9:127451380-127451400:-	FALSE	5'- GGCTTTCGGCTCGGAGGAGGCCAAGGTGCA -3' rG4seq-K --------------------*---------	RPL12|ENSG00000197958.13	ENST00000361436.10;ENST00000497322.1;ENST00000497825.5	5UTR	211	180	37	19		60	50	29	17
chr9	133362111	133362112	two-quartet	-	chr9:133362112-133362139:-	FALSE	5'- GGCTCTGCAGGGCAGGGGTGAGGCAGGTTTCTGCTCA -3' rG4seq-K ---------------------------*---------	SURF4|ENSG00000148248.14	ENST00000371989.8;ENST00000545297.5;ENST00000613129.4;ENST00000618229.4	3UTR	52	31	15	1		25	17	18	1
chr9	137448653	137448654	two-quartet	-	chr9:137448653-137448670:-	FALSE	5'- GGAGGCTCTGGGTGGGGCCTGCTCCCC -3' rG4seq-K ----------------*----------	NSMF|ENSG00000165802.23	ENST00000265663.12;ENST00000371472.6;ENST00000371473.7;ENST00000371474.7;ENST00000371475.9;ENST00000371482.5;ENST00000437259.5	3UTR	65	57	7	1		18	15	11	3
chrX	154360554	154360555	bulges	-	chrX:154360552-154360575:-	FALSE	5'- GGGCCGGGGCTGCAGGGAGGCAGTGCGGGCTCC -3' rG4seq-K --------------------*------------	FLNA|ENSG00000196924.19	ENST00000360319.9;ENST00000369850.10;ENST00000369856.8;ENST00000420627.5;ENST00000422373.6;ENST00000610817.5;ENST00000673639.2;ENST00000676696.1	3UTR;CDS	77	34	14	0		31	21	19	6
