# Supplementary material
Source: HighWire-hosted journal article supplement (doi:10.1101/rna.080321.124)
Supplement: Supplemental_Table_S7.xlsx [file Supplemental_Table_S7.xlsx]

## Sheet: PDS_DP-K-rep1.bootstrap_00.covr
In vivo PDS											Biological rep1					Biological rep2
chromosome	start	end	rG4_structural_class	strand	rG4_intervals	splicing	sequence_diagram	'oc43'_gene_names	'oc43'_coding_regions	'oc43'_transcript_ids	BR1_K+ coverage	BR1_K+ stop	BR1_Li+ coverage	BR1_Li+ stop		BR2_K+ coverage	BR2_K+ stop	BR2_Li+ coverage	BR2_Li+ stop
chr12	104349505	104349506	potential G-quadruplex & G>=40%	+	chr12:104349446-104349506:+	FALSE	5'- AGGAAGTTATTAATATCATAAGTTATTATTAATATTTTGAACACAGGTGGATGTGAAGGATTTTCATTTA -3' rG4seq-K -----------------------------------------------------------*----------	TXNRD1|ENSG00000198431.17	ENST00000503506.6;ENST00000525566.6;ENST00000526390.5;ENST00000526691.5;ENST00000527688.5	3UTR	15	4	19	1		14	2	38	1
NC_006213.1	859	861	two-quartet	+	NC_006213.1:835-860:+	FALSE	5'- GGTGCAGGTCAATTCGTGGGTTGGGTCATACCCTT -3' rG4seq-K ------------------------**---------	4933401J01Rik|ENSMUSG00000102693.1	ENSMUST00000193812.1	non_coding	1899	82	3314	138		1922	84	4544	165
NC_006213.1	1701	1702	two-quartet	+	NC_006213.1:1684-1701:+	FALSE	5'- GGCTATGGTGGTTTTGGTTGTAAAGAT -3' rG4seq-K -----------------*---------	4933401J01Rik|ENSMUSG00000102693.1	ENSMUST00000193812.1	non_coding	431	32	953	57		479	29	1474	72
NC_006213.1	30111	30112	potential G-quadruplex & G>=40%	+	NC_006213.1:30052-30112:+	FALSE	5'- CAATGCACTGTTCAGCAGTGTTTTGGTAAGAGAGGCCCTAATCAGAATTTTGGTGGTGGAGAAATGTTAA -3' rG4seq-K -----------------------------------------------------------*----------	4933401J01Rik|ENSMUSG00000102693.1	ENSMUST00000193812.1	non_coding	701	65	1491	123		814	69	1980	151
NC_006213.1	30129	30130	potential G-quadruplex & G>=40%	+	NC_006213.1:30070-30130:+	FALSE	5'- TGTTTTGGTAAGAGAGGCCCTAATCAGAATTTTGGTGGTGGAGAAATGTTAAAACTTGGAACTAGTGACC -3' rG4seq-K -----------------------------------------------------------*----------	4933401J01Rik|ENSMUSG00000102693.1	ENSMUST00000193812.1	non_coding	3804	283	9288	544		3822	248	11291	649
