# Supplementary material
Source: HighWire-hosted journal article supplement (doi:10.1101/rna.080321.124)
Supplement: Supplemental_Table_S8.xlsx [file Supplemental_Table_S8.xlsx]

## Sheet: cx5461_DN-result.csv.new
In vitro rG4 cx5461											Biological rep1					Biological rep2
chromosome	start	end	rG4_structural_class	strand	rG4_intervals	splicing	sequence_diagram	gene_names	coding_regions	transcript_ids	BR1_K+ coverage	BR1_K+stop	BR1_Li+coverage	BR1_Li+stop		DNrep2_K_cov	DNrep2_K_stop	DNrep2_Li_cov	DNrep2_Li_stop
chr1	23694665	23694667	two-quartet	+	chr1:23693897-23693913:+,chr1:23694659-23694666:+	TRUE	5'- GGAGAAGGGTCTAAAGGTGCGGGAGTATGAGTT -3' rG4seq-K ----------------------**---------	RPL11|ENSG00000142676.14	ENST00000374550.8;ENST00000443624.6;ENST00000458455.2;ENST00000467075.2;ENST00000482370.2;ENST00000643754.2	3UTR;CDS	166	87	106	8		135	88	67	3
chr1	26864120	26864121	two-quartet	+	chr1:26864092-26864121:+	FALSE	5'- GGCAGAGCTGAGGCCACCTGGGGCTGGGGATCCCACTCT -3' rG4seq-K ----------------------------*----------	SFN|ENSG00000175793.12	ENST00000339276.6	3UTR	23	13	30	3		23	8	12	0
chr1	32332159	32332160	two-quartet	+	chr1:32332144-32332159:+	FALSE	5'- GGAGGGAGAGGGGGGCCGCAAGAAC -3' rG4seq-K ---------------*---------	HDAC1|ENSG00000116478.12	ENST00000373548.8;ENST00000471488.1;ENST00000476391.5	CDS	42	40	8	3		37	33	7	0
chr1	36304311	36304312	canonical/G3L1-7	+	chr1:36304286-36304311:+	FALSE	5'- GGGGTGGGGGCAGGGGTAGGGCGGGAGAGCGATGC -3' rG4seq-K -------------------------*---------	THRAP3|ENSG00000054118.15	ENST00000354618.10;ENST00000648638.1	3UTR	57	33	19	1		54	36	8	1
chr1	67685302	67685304	potential G-quadruplex & G>=40%	+	chr1:67685244-67685304:+	FALSE	5'- TCGTGCGGCCCGTGGCGAGGCGAGGTCCGGGGAGCGAGCGAGCAAGCAAGGCGGGAGGGGTGGCCGGAGC -3' rG4seq-K ----------------------------------------------------------**----------	GADD45A|ENSG00000116717.13	ENST00000370985.4;ENST00000370986.9;ENST00000460575.1;ENST00000648742.1;ENST00000650283.1	5UTR	18	11	16	1		19	8	12	0
chr1	85583134	85583136	bulges	+	chr1:85583108-85583137:+	FALSE	5'- GGAGAAAATGGGCGGGGGTGGTGTGGGTGATGGGACTCA -3' rG4seq-K --------------------------**-----------	CCN1|ENSG00000142871.18	ENST00000451137.7;ENST00000674743.1;ENST00000674818.1;ENST00000675083.1;ENST00000676007.1	3UTR	62	54	27	3		40	37	13	1
chr1	85583618	85583619	bulges	+	chr1:85583591-85583618:+	FALSE	5'- GGGGAGGGAGGGGAAATGTAATACTGGAATAATTTGT -3' rG4seq-K ---------------------------*---------	CCN1|ENSG00000142871.18	ENST00000451137.7;ENST00000674743.1;ENST00000674818.1;ENST00000675083.1;ENST00000676007.1	3UTR	82	53	18	1		60	33	9	0
chr1	116404624	116404626	bulges	+	chr1:116404608-116404625:+	FALSE	5'- GGGGGGAGGGGGGAGGGCTGCCTGAAA -3' rG4seq-K ----------------**---------	ATP1A1|ENSG00000163399.16	ENST00000295598.10;ENST00000369496.8;ENST00000440951.1;ENST00000537345.5	3UTR	86	73	40	6		76	61	40	2
chr1	151198785	151198786	bulges	+	chr1:151198750-151198784:+	FALSE	5'- GTGGAAAGCGGTTAAACTTGTGGAGGGGGTGCGGGACGTGAGTT -3' rG4seq-K -----------------------------------*--------	PIP5K1A|ENSG00000143398.20	ENST00000349792.9;ENST00000368888.9;ENST00000368890.8;ENST00000409426.5;ENST00000424999.1;ENST00000441902.6;ENST00000447555.5;ENST00000454769.2	5UTR	17	9	13	0		12	9	7	1
chr1	155320639	155320640	two-quartet	+	chr1:155320623-155320639:+	FALSE	5'- GGGCGGGGAGAGGAGGCTCTCAATAA -3' rG4seq-K ----------------*---------	FDPS|ENSG00000160752.15	ENST00000356657.10;ENST00000368356.9;ENST00000467076.5;ENST00000490140.1;ENST00000492244.5;ENST00000611010.4;ENST00000612683.1	3UTR	52	45	10	2		51	41	10	2
chr1	156136402	156136403	bulges	+	chr1:156136365-156136401:+	FALSE	5'- GCGGGCGCGTGGCCGTGGAGGAGGTGGATGAGGAGGGCAAGTTTGT -3' rG4seq-K -------------------------------------*--------	LMNA|ENSG00000160789.24	ENST00000361308.9;ENST00000368297.5;ENST00000368298.2;ENST00000368299.7;ENST00000368300.9;ENST00000368301.6;ENST00000448611.6;ENST00000459904.2;ENST00000473598.6;ENST00000496738.6;ENST00000498722.3;ENST00000674518.1;ENST00000674600.1;ENST00000674720.1;ENST00000675431.1;ENST00000675455.1;ENST00000675667.1;ENST00000675874.1;ENST00000675881.1;ENST00000675939.1;ENST00000675989.1;ENST00000676208.1;ENS…	3UTR;CDS	81	67	20	1		79	61	11	0
chr1	156138703	156138705	bulges	+	chr1:156138675-156138704:+	FALSE	5'- GGGGGGCAGTGGGGGTGGCAGCTTCGGGGACAATCTGGT -3' rG4seq-K ----------------------------**---------	LMNA|ENSG00000160789.24	ENST00000361308.9;ENST00000368299.7;ENST00000368300.9;ENST00000448611.6;ENST00000473598.6;ENST00000506981.1;ENST00000674518.1;ENST00000674600.1;ENST00000675455.1;ENST00000675667.1;ENST00000675874.1;ENST00000675881.1;ENST00000675939.1;ENST00000675989.1;ENST00000676208.1;ENST00000676385.2;ENST00000676434.1;ENST00000682650.1;ENST00000683032.1;ENST00000683773.1;ENST00000684195.1	3UTR;CDS	87	37	26	3		59	21	26	1
chr1	156139930	156139931	bulges	+	chr1:156139897-156139930:+	FALSE	5'- GGGAGGAGGGAGAGGGAGGTCACTGGAAAGGGGAGAGCCTGCT -3' rG4seq-K ---------------------------------*---------	LMNA|ENSG00000160789.24	ENST00000368300.9;ENST00000448611.6;ENST00000675881.1	3UTR	73	19	28	1		53	20	13	1
chr1	156139987	156139988	bulges	+	chr1:156139955-156139987:+	FALSE	5'- GGAGGAAGGCAAGAGGGGGTGGAGGGGTGTGGCAGTGGTTTT -3' rG4seq-K --------------------------------*---------	LMNA|ENSG00000160789.24	ENST00000368300.9;ENST00000448611.6;ENST00000675881.1	3UTR	57	43	12	2		68	55	7	1
chr1	160214722	160214723	potential G-quadruplex & G>=40%	+	chr1:160214663-160214723:+	FALSE	5'- AGCATTAACTTATTGTCTAGGCCAGAGCGGGGGTGGGAGGGGAATGCCACAGTGAAGGGAGTGGCAGAAT -3' rG4seq-K -----------------------------------------------------------*----------	PEA15|ENSG00000162734.13	ENST00000360472.9;ENST00000368076.1	3UTR	41	31	11	1		24	16	7	1
chr1	223755546	223755549	bulges	+	chr1:223755516-223755550:+	FALSE	5'- GGAGGAGGAGGATGAGGACGAGGAGGATGGGGAGAGCGGCTGCA -3' rG4seq-K ------------------------------*-*-----------	CAPN2|ENSG00000162909.18	ENST00000295006.6;ENST00000433674.6;ENST00000480581.1	CDS	81	31	49	3		59	27	26	1
chr10	28620481	28620482	two-quartet	+	chr10:28620460-28620481:+	FALSE	5'- GGTTGTGGGAGGGGAAAGAGGAAACAGAGCT -3' rG4seq-K ---------------------*---------	WAC|ENSG00000095787.24	ENST00000347934.8;ENST00000354911.9;ENST00000375664.8;ENST00000414108.6;ENST00000420266.6;ENST00000442148.6;ENST00000628285.3;ENST00000679398.1;ENST00000679428.1;ENST00000679570.1;ENST00000680735.1;ENST00000681112.1	3UTR	45	33	15	2		44	32	9	1
chr10	72275604	72275606	bulges	+	chr10:72275581-72275604:+	FALSE	5'- GGAGGGAGGGGGGAGGTCGGAGGTCGTGGAGGT -3' rG4seq-K -----------------------**--------	DDIT4|ENSG00000168209.6	ENST00000307365.4;ENST00000471240.2;ENST00000473155.2;ENST00000491934.3;ENST00000681898.1	3UTR	41	24	25	2		61	30	20	3
chr10	72275766	72275767	bulges	+	chr10:72275743-72275766:+	FALSE	5'- GTAGGAAGGGGTGGGTGTCAGGGATCACTTGGG -3' rG4seq-K -----------------------*---------	DDIT4|ENSG00000168209.6	ENST00000307365.4;ENST00000471240.2;ENST00000473155.2;ENST00000491934.3;ENST00000681898.1	3UTR	42	38	18	2		29	21	8	0
chr10	72275776	72275777	canonical/G3L1-7	+	chr10:72275750-72275776:+	FALSE	5'- GGGGTGGGTGTCAGGGATCACTTGGGATCTTTGACA -3' rG4seq-K --------------------------*---------	DDIT4|ENSG00000168209.6	ENST00000307365.4;ENST00000471240.2;ENST00000473155.2;ENST00000491934.3;ENST00000681898.1	3UTR	102	53	17	0		73	41	10	2
chr10	84150220	84150221	longloop	+	chr10:84150193-84150220:+	FALSE	5'- GGGTGCACCCCTGGGAGTGGGCCTGGGTCTCGTCTTT -3' rG4seq-K ---------------------------*---------	GHITM|ENSG00000165678.22	ENST00000372134.6;ENST00000686247.1;ENST00000686583.1;ENST00000687085.1;ENST00000688802.1;ENST00000690067.1;ENST00000690283.1;ENST00000690587.1;ENST00000690920.1;ENST00000691155.1;ENST00000691609.1;ENST00000691751.1;ENST00000692871.1	CDS	34	12	29	1		15	8	14	1
chr11	8685819	8685821	potential G-quadruplex & G>=40%	+	chr11:8685761-8685821:+	FALSE	5'- GAGAAGATTAAGAGTGTTGGGGGGGCCTGTGTCCTGGTGGCTTGAAGCCACATGGAGGGAGTTTCATTAA -3' rG4seq-K ----------------------------------------------------------**----------	RPL27A|ENSG00000166441.13	ENST00000314138.11;ENST00000524496.5;ENST00000525981.1;ENST00000526562.5;ENST00000530022.5;ENST00000530913.1;ENST00000532359.5;ENST00000534599.5	3UTR;CDS	207	69	225	6		146	40	99	2
chr11	62881186	62881187	bulges	+	chr11:62881148-62881186:+	FALSE	5'- GGTGAAGATCAAGGTGGCGGAAGACGAGGCGGAGGCGGCAGCCGCGGC -3' rG4seq-K --------------------------------------*---------	SLC3A2|ENSG00000168003.18	ENST00000338663.12;ENST00000377889.6;ENST00000377890.6;ENST00000377891.6;ENST00000535296.5;ENST00000538084.2;ENST00000539458.1;ENST00000541372.1;ENST00000541425.6;ENST00000544377.2;ENST00000679908.1;ENST00000680002.1;ENST00000680134.1;ENST00000680297.1;ENST00000680610.1;ENST00000680631.1;ENST00000680654.1;ENST00000680725.1;ENST00000680729.1;ENST00000681107.1;ENST00000681215.1;ENST00000681232.1;EN…	CDS	49	25	24	1		47	33	11	1
chr11	64204454	64204455	longloop	+	chr11:64204430-64204456:+	FALSE	5'- GGGCATGTTATGGGGAGGGGAGGGGGTTCTTCCAGC -3' rG4seq-K ------------------------*-----------	STIP1|ENSG00000168439.17	ENST00000305218.9;ENST00000358794.9	3UTR	62	45	16	5		42	29	13	2
chr11	64318220	64318221	bulges	+	chr11:64318194-64318220:+	FALSE	5'- GGAAGTGGCCGTGGGGCGGGTATGGGACTAGCTGGC -3' rG4seq-K --------------------------*---------	PRDX5|ENSG00000126432.14	ENST00000265462.9;ENST00000347941.4;ENST00000352435.8	5UTR;CDS	38	34	6	2		31	23	7	1
chr11	65423083	65423084	potential G-quadruplex & G>=40%	+	chr11:65423024-65423084:+	FALSE	5'- CGCTCCAGGCCAGGCTGTCCCTACTGCCTGGTGGAGGGGGAACTTGACCTCTGGGAGGGCGCCGCTCTTG -3' rG4seq-K -----------------------------------------------------------*----------	NEAT1|ENSG00000245532.10	ENST00000499732.3;ENST00000501122.2;ENST00000601801.3;ENST00000612303.2;ENST00000670617.1;ENST00000685861.1;ENST00000687132.1	non_coding	29	20	12	0		24	22	10	3
chr11	65423251	65423252	longloop	+	chr11:65423228-65423251:+	FALSE	5'- GGGCTGCAGGAGGGCCGGGAGGGCTAATCTTCA -3' rG4seq-K -----------------------*---------	NEAT1|ENSG00000245532.10	ENST00000499732.3;ENST00000501122.2;ENST00000601801.3;ENST00000612303.2;ENST00000645023.1;ENST00000646243.1;ENST00000670617.1;ENST00000685861.1;ENST00000687132.1	non_coding	57	45	17	2		46	35	6	0
chr11	65423845	65423846	two-quartet	+	chr11:65423829-65423845:+	FALSE	5'- GGCTGGGGTGGGGCGGATCGGTGTTG -3' rG4seq-K ----------------*---------	NEAT1|ENSG00000245532.10	ENST00000499732.3;ENST00000501122.2;ENST00000601801.3;ENST00000612303.2;ENST00000642367.1;ENST00000645023.1;ENST00000646243.1;ENST00000670617.1;ENST00000685861.1;ENST00000687132.1	non_coding	25	9	16	0		20	13	6	0
chr11	65425344	65425346	potential G-quadruplex & G>=40%	+	chr11:65425286-65425346:+	FALSE	5'- GTCACCAGTTTTCCGAGAACCAAAGGGAGGGGTGTGTGATGCCATCTCACAGGCAGGGGAAATGTCTTTA -3' rG4seq-K ----------------------------------------------------------**----------	NEAT1|ENSG00000245532.10	ENST00000499732.3;ENST00000501122.2;ENST00000601801.3;ENST00000645023.1;ENST00000646243.1;ENST00000670617.1;ENST00000685861.1;ENST00000687132.1	non_coding	30	15	37	4		30	12	26	1
chr11	65426045	65426046	canonical/G3L1-7	+	chr11:65426022-65426046:+	FALSE	5'- GGGAAGGGGATGGGGATTGTGGGGAGAGAGTGGG -3' rG4seq-K -----------------------*----------	NEAT1|ENSG00000245532.10	ENST00000499732.3;ENST00000501122.2;ENST00000601801.3;ENST00000616315.2;ENST00000645023.1;ENST00000646243.1;ENST00000670617.1;ENST00000685861.1;ENST00000687132.1;ENST00000693290.1	non_coding	16	14	6	0		14	12	6	1
chr11	65500883	65500884	potential G-quadruplex & G>=40%	+	chr11:65500824-65500884:+	FALSE	5'- ATTTATTTTCTAATATAATGGGGGAGTTTCGTACTGAGGTGTAAAGGGATTTATATGGGGACGTAGGCCG -3' rG4seq-K -----------------------------------------------------------*----------	MALAT1|ENSG00000251562.9	ENST00000534336.1;ENST00000544868.2;ENST00000619449.2	non_coding	69	19	47	1		63	21	26	2
chr11	65501213	65501214	potential G-quadruplex & G>=40%	+	chr11:65501154-65501214:+	FALSE	5'- CCTCACCCTGAATTCGTTTTGTAAATGTAGAGTTTGGATGTGTAACTGAGGCGGGGGGGAGTTTTCAGTA -3' rG4seq-K -----------------------------------------------------------*----------	MALAT1|ENSG00000251562.9	ENST00000534336.1;ENST00000619449.2	non_coding	71	34	48	2		70	37	40	2
chr11	65501244	65501245	two-quartet	+	chr11:65501235-65501246:+	FALSE	5'- GGGGGTGGGGGCAAAATATGT -3' rG4seq-K ---------*-----------	MALAT1|ENSG00000251562.9	ENST00000534336.1;ENST00000619449.2	non_coding	142	99	59	21		125	86	44	9
chr11	65501559	65501560	bulges	+	chr11:65501527-65501561:+	FALSE	5'- GGATGGTCTTAACAGGGAAGAGAGAGGGTGGGGGAGAAAATGTT -3' rG4seq-K --------------------------------*-----------	MALAT1|ENSG00000251562.9	ENST00000534336.1;ENST00000619449.2	non_coding	473	440	87	14		418	400	45	9
chr11	65501904	65501906	bulges	+	chr11:65501874-65501905:+	FALSE	5'- GGCCTGTTACGGTTGGGATTGGTGGGGTGGGTTTAGGTAAT -3' rG4seq-K ------------------------------**---------	MALAT1|ENSG00000251562.9	ENST00000508832.2;ENST00000534336.1;ENST00000619449.2	non_coding	602	547	122	40		435	377	46	16
chr11	65502614	65502615	longloop	+	chr11:65502587-65502615:+	FALSE	5'- GGGTGGGCTTTTGTTGATGAGGGAGGGGAAACTTTTTT -3' rG4seq-K ---------------------------*----------	MALAT1|ENSG00000251562.9	ENST00000508832.2;ENST00000534336.1;ENST00000616527.4;ENST00000619449.2	non_coding	180	167	63	34		149	139	42	24
chr11	65503083	65503084	two-quartet	+	chr11:65503061-65503083:+	FALSE	5'- GGGATCAAGTGGATTGAGGAGGCTGTGCTGTG -3' rG4seq-K ----------------------*---------	MALAT1|ENSG00000251562.9	ENST00000508832.2;ENST00000534336.1;ENST00000616527.4;ENST00000618925.1;ENST00000619449.2	non_coding	89	20	71	3		62	23	37	4
chr11	65503707	65503709	potential G-triplex & G>=40%	+	chr11:65503649-65503709:+	FALSE	5'- CCTTATTTAAATAAAATAGTGTTTGTCTGTAGTTCAGTGTTGGGGCAATCTTGGGGGGGATTCTTCTCTA -3' rG4seq-K ----------------------------------------------------------**----------	MALAT1|ENSG00000251562.9	ENST00000534336.1;ENST00000612781.1;ENST00000616527.4;ENST00000618925.1;ENST00000619449.2;ENST00000620465.4	non_coding	388	204	198	26		277	165	61	8
chr11	65504107	65504110	canonical/G3L1-7	+	chr11:65504084-65504108:+	FALSE	5'- GGGAAGGGAGGGGGTGCCTGTGGGGTTTTAAAGA -3' rG4seq-K -----------------------***--------	MALAT1|ENSG00000251562.9	ENST00000534336.1;ENST00000612781.1;ENST00000616527.4;ENST00000618132.1;ENST00000619449.2;ENST00000620465.4	non_coding	1092	617	295	47		951	526	140	21
chr11	65504292	65504294	canonical/G3L1-7	+	chr11:65504271-65504293:+	FALSE	5'- GGGATGGGAGGAGGGGGTGGGGCTTACTTGTT -3' rG4seq-K ---------------------**---------	MALAT1|ENSG00000251562.9	ENST00000534336.1;ENST00000612781.1;ENST00000616527.4;ENST00000618132.1;ENST00000619449.2;ENST00000620465.4	non_coding	1368	669	438	81		1135	547	236	46
chr11	65504632	65504633	two-quartet	+	chr11:65504619-65504633:+	FALSE	5'- GGTGGTGGGAGGGGACTGAAGCCT -3' rG4seq-K -------------*----------	MALAT1|ENSG00000251562.9	ENST00000534336.1;ENST00000610851.1;ENST00000612781.1;ENST00000613376.1;ENST00000618132.1;ENST00000619449.2	non_coding	311	233	189	111		233	189	95	52
chr11	65505148	65505149	two-quartet	+	chr11:65505131-65505149:+	FALSE	5'- GGCGTGGGGGTGGAGGGGTGAGGTGGGC -3' rG4seq-K -----------------*----------	MALAT1|ENSG00000251562.9	ENST00000534336.1;ENST00000610851.1;ENST00000618227.1;ENST00000619449.2	non_coding	55	46	95	21		43	32	52	17
chr11	65505154	65505155	bulges	+	chr11:65505131-65505157:+	FALSE	5'- GGCGTGGGGGTGGAGGGGTGAGGTGGGCGCTAAGCC -3' rG4seq-K -----------------------*------------	MALAT1|ENSG00000251562.9	ENST00000534336.1;ENST00000610851.1;ENST00000618227.1;ENST00000619449.2	non_coding	113	41	126	13		95	39	71	10
chr11	65505157	65505159	bulges	+	chr11:65505131-65505160:+	FALSE	5'- GGCGTGGGGGTGGAGGGGTGAGGTGGGCGCTAAGCCTTT -3' rG4seq-K --------------------------**-----------	MALAT1|ENSG00000251562.9	ENST00000534336.1;ENST00000610851.1;ENST00000618227.1;ENST00000619449.2	non_coding	683	423	284	18		623	399	151	10
chr11	65505477	65505478	bulges	+	chr11:65505450-65505478:+	FALSE	5'- GCGGTGCTTGAAGGGGAGGGAAAGGGGGAAAGCGGGCA -3' rG4seq-K ---------------------------*----------	MALAT1|ENSG00000251562.9	ENST00000534336.1;ENST00000610851.1;ENST00000616691.1;ENST00000617489.1;ENST00000618227.1;ENST00000619449.2	non_coding	214	191	123	14		170	155	59	5
chr11	65505485	65505487	canonical/G3L1-7	+	chr11:65505462-65505486:+	FALSE	5'- GGGGAGGGAAAGGGGGAAAGCGGGCAACCACTTT -3' rG4seq-K -----------------------**---------	MALAT1|ENSG00000251562.9	ENST00000534336.1;ENST00000610851.1;ENST00000616691.1;ENST00000617489.1;ENST00000618227.1;ENST00000619449.2	non_coding	1324	628	378	40		1063	498	181	16
chr11	65505918	65505920	bulges	+	chr11:65505894-65505919:+	FALSE	5'- GTGGCTGAGAGGGCTTTTGGGTGGGAATGCAAAAA -3' rG4seq-K ------------------------**---------	MALAT1|ENSG00000251562.9	ENST00000534336.1;ENST00000610851.1;ENST00000616691.1;ENST00000617489.1;ENST00000618227.1;ENST00000619449.2	non_coding	604	500	149	15		451	361	64	3
chr11	67586587	67586589	two-quartet	+	chr11:67586559-67586588:+	FALSE	5'- GGCAACGGGAAACAGTGAGGGTTGGGGGGACTCTGAGCG -3' rG4seq-K ----------------------------**---------	GSTP1|ENSG00000084207.18	ENST00000398603.6;ENST00000398606.10;ENST00000467591.1;ENST00000494593.1;ENST00000498765.5	3UTR;CDS	105	36	86	9		64	29	40	0
chr11	67586600	67586601	bulges	+	chr11:67586566-67586600:+	FALSE	5'- GGAAACAGTGAGGGTTGGGGGGACTCTGAGCGGGAGGCAGAGTT -3' rG4seq-K ----------------------------------*---------	GSTP1|ENSG00000084207.18	ENST00000398603.6;ENST00000398606.10;ENST00000467591.1;ENST00000494593.1;ENST00000498765.5	3UTR;CDS	127	50	57	4		92	32	31	1
chr11	69651232	69651233	bulges	+	chr11:69651207-69651234:+	FALSE	5'- GAGGAGGAGGAAGAGGAGGAGGAGGAGGTGGACCTGG -3' rG4seq-K -------------------------*-----------	CCND1|ENSG00000110092.4	ENST00000227507.3;ENST00000542367.1	CDS	32	30	26	11		35	35	12	5
chr11	69651238	69651239	bulges	+	chr11:69651207-69651238:+	FALSE	5'- GAGGAGGAGGAAGAGGAGGAGGAGGAGGTGGACCTGGCTTG -3' rG4seq-K -------------------------------*---------	CCND1|ENSG00000110092.4	ENST00000227507.3;ENST00000542367.1	CDS	116	39	35	3		100	37	17	1
chr11	69651552	69651553	two-quartet	+	chr11:69651537-69651552:+	FALSE	5'- GGTGGGGGAGGAGGGTTGTGCTACA -3' rG4seq-K ---------------*---------	CCND1|ENSG00000110092.4	ENST00000227507.3	3UTR	124	108	25	1		82	74	13	2
chr11	69652380	69652381	potential G-quadruplex & G>=40%	+	chr11:69652321-69652381:+	FALSE	5'- AATAGCGCTGTTTTTGTTGTGTGTGCAGGGAGGGCAGTTTTCTAATGGAATGGTTTGGGAATATCCATGT -3' rG4seq-K -----------------------------------------------------------*----------	CCND1|ENSG00000110092.4	ENST00000227507.3	3UTR	42	30	13	1		30	20	7	0
chr11	69652452	69652453	bulges	+	chr11:69652422-69652455:+	FALSE	5'- GTGGGCCACTGTGGTGGCAGTGGAGGTGGGGTGTTTGGGAGGC -3' rG4seq-K ------------------------------*------------	CCND1|ENSG00000110092.4	ENST00000227507.3	3UTR	13	9	10	0		7	6	6	0
chr11	69652461	69652462	bulges	+	chr11:69652422-69652464:+	FALSE	5'- GTGGGCCACTGTGGTGGCAGTGGAGGTGGGGTGTTTGGGAGGCTGCGTGCCA -3' rG4seq-K ---------------------------------------*------------	CCND1|ENSG00000110092.4	ENST00000227507.3	3UTR	53	28	11	1		51	33	9	2
chr11	69654348	69654349	two-quartet	+	chr11:69654332-69654351:+	FALSE	5'- GGGTCTGGGCGGCGGGCGGCTGGGTCTGT -3' rG4seq-K ----------------*------------	CCND1|ENSG00000110092.4	ENST00000227507.3	3UTR	36	31	13	1		29	23	12	0
chr11	69654356	69654357	canonical/G3L1-7	+	chr11:69654332-69654356:+	FALSE	5'- GGGTCTGGGCGGCGGGCGGCTGGGTCTGTGCATT -3' rG4seq-K ------------------------*---------	CCND1|ENSG00000110092.4	ENST00000227507.3	3UTR	93	42	16	1		69	26	11	0
chr11	70429137	70429138	bulges	+	chr11:70429111-70429139:+	FALSE	5'- GGAGGACAGGCGGAAGGCGGAGGCGGAGAGAGCCCAGC -3' rG4seq-K --------------------------*-----------	CTTN|ENSG00000085733.16	ENST00000301843.13;ENST00000346329.7;ENST00000376561.7;ENST00000393747.3;ENST00000498223.3;ENST00000527962.5;ENST00000529736.5;ENST00000533931.1	CDS	20	18	7	0		20	16	9	0
chr11	130143491	130143492	bulges	+	chr11:130143454-130143491:+	FALSE	5'- GGGAGCGCGGCAGCCCTGGCGGAGGGATGCAGGTGGGCCGGAAGATC -3' rG4seq-K -------------------------------------*---------	APLP2|ENSG00000084234.18	ENST00000263574.9;ENST00000278756.7;ENST00000338167.10;ENST00000345598.9;ENST00000525604.1;ENST00000528499.5;ENST00000533616.5;ENST00000533860.5;ENST00000650012.1	3UTR	23	16	8	1		20	11	9	0
chr12	6769945	6769946	two-quartet	+	chr12:6769919-6769945:+	FALSE	5'- GGAGGAGGAGAACGGGGCTGAGGAGGAAGAAGAAGA -3' rG4seq-K --------------------------*---------	PTMS|ENSG00000159335.18	ENST00000309083.8;ENST00000389462.8;ENST00000538057.2;ENST00000540667.5	CDS	38	18	19	1		32	26	9	1
chr12	6770499	6770500	bulges	+	chr12:6770478-6770501:+	FALSE	5'- GGGCCTGGAGGTGGGGGTGGGGGCAGCCAAGTC -3' rG4seq-K ---------------------*-----------	PTMS|ENSG00000159335.18	ENST00000309083.8;ENST00000389462.8;ENST00000538057.2;ENST00000540667.5	3UTR	73	59	38	8		66	48	13	3
chr12	52070076	52070077	bulges	+	chr12:52070051-52070078:+	FALSE	5'- GTGGACTGTGGTTGGGGGAGGTGGGAGCTGTTTTAAC -3' rG4seq-K -------------------------*-----------	ATG101|ENSG00000123395.15	ENST00000336854.9;ENST00000547409.1;ENST00000548915.1;ENST00000550604.1;ENST00000552544.5;ENST00000552947.1;ENST00000553049.5	5UTR	16	11	9	1		13	10	6	1
chr12	52949356	52949358	two-quartet	+	chr12:52949336-52949358:+	FALSE	5'- GGGGCGGCATGGGGTCCGGGGGCCTGGCCACC -3' rG4seq-K --------------------**----------	KRT18|ENSG00000111057.11	ENST00000388835.4;ENST00000388837.6;ENST00000549078.5;ENST00000550600.5	CDS	236	84	215	17		222	83	149	9
chr12	103930460	103930464	two-quartet	+	chr12:103930452-103930466:+	FALSE	5'- GGGGTGGGGGGTGGAGGCGGCTCC -3' rG4seq-K --------*-**------------	HSP90B1|ENSG00000166598.16;MIR3652|ENSG00000284503.1	ENST00000299767.10;ENST00000540297.7;ENST00000548462.5;ENST00000548622.1;ENST00000549334.5;ENST00000550595.2;ENST00000579335.1;ENST00000614327.2;ENST00000640977.2;ENST00000679377.1;ENST00000679538.1;ENST00000679779.1;ENST00000680242.1;ENST00000680281.1;ENST00000680370.1;ENST00000680391.1;ENST00000680653.1;ENST00000680663.1;ENST00000680762.1;ENST00000680899.1;ENST00000680989.1;ENST00000681172.1;EN…	5UTR;non_coding	113	32	385	45		150	39	197	26
chr12	103930466	103930467	two-quartet	+	chr12:103930452-103930466:+	FALSE	5'- GGGGTGGGGGGTGGAGGCGGCTCC -3' rG4seq-K --------------*---------	HSP90B1|ENSG00000166598.16;MIR3652|ENSG00000284503.1	ENST00000299767.10;ENST00000540297.7;ENST00000548462.5;ENST00000548622.1;ENST00000549334.5;ENST00000550595.2;ENST00000579335.1;ENST00000614327.2;ENST00000640977.2;ENST00000679377.1;ENST00000679538.1;ENST00000679779.1;ENST00000680242.1;ENST00000680281.1;ENST00000680370.1;ENST00000680391.1;ENST00000680653.1;ENST00000680663.1;ENST00000680762.1;ENST00000680899.1;ENST00000680989.1;ENST00000681172.1;EN…	5UTR;non_coding	94	47	122	8		93	38	64	5
chr12	103930469	103930470	two-quartet	+	chr12:103930452-103930472:+	FALSE	5'- GGGGTGGGGGGTGGAGGCGGCTCCTGCGAT -3' rG4seq-K -----------------*------------	HSP90B1|ENSG00000166598.16;MIR3652|ENSG00000284503.1	ENST00000299767.10;ENST00000540297.7;ENST00000548462.5;ENST00000548622.1;ENST00000549334.5;ENST00000550595.2;ENST00000579335.1;ENST00000614327.2;ENST00000640977.2;ENST00000679377.1;ENST00000679538.1;ENST00000679779.1;ENST00000680242.1;ENST00000680281.1;ENST00000680370.1;ENST00000680391.1;ENST00000680653.1;ENST00000680663.1;ENST00000680762.1;ENST00000680899.1;ENST00000680989.1;ENST00000681172.1;EN…	5UTR;non_coding	190	87	126	5		179	77	69	4
chr12	103930472	103930473	two-quartet	+	chr12:103930452-103930472:+	FALSE	5'- GGGGTGGGGGGTGGAGGCGGCTCCTGCGAT -3' rG4seq-K --------------------*---------	HSP90B1|ENSG00000166598.16;MIR3652|ENSG00000284503.1	ENST00000299767.10;ENST00000540297.7;ENST00000548462.5;ENST00000548622.1;ENST00000549334.5;ENST00000550595.2;ENST00000579335.1;ENST00000614327.2;ENST00000640977.2;ENST00000679377.1;ENST00000679538.1;ENST00000679779.1;ENST00000680242.1;ENST00000680281.1;ENST00000680370.1;ENST00000680391.1;ENST00000680653.1;ENST00000680663.1;ENST00000680762.1;ENST00000680899.1;ENST00000680989.1;ENST00000681172.1;EN…	5UTR;non_coding	279	64	147	15		277	71	81	4
chr12	103930490	103930491	bulges	+	chr12:103930452-103930490:+	FALSE	5'- GGGGTGGGGGGTGGAGGCGGCTCCTGCGATCGAAGGGGACTTGAGACT -3' rG4seq-K --------------------------------------*---------	HSP90B1|ENSG00000166598.16;MIR3652|ENSG00000284503.1	ENST00000299767.10;ENST00000540297.7;ENST00000548462.5;ENST00000548622.1;ENST00000549334.5;ENST00000550595.2;ENST00000579335.1;ENST00000614327.2;ENST00000640977.2;ENST00000679377.1;ENST00000679538.1;ENST00000679779.1;ENST00000680242.1;ENST00000680281.1;ENST00000680370.1;ENST00000680391.1;ENST00000680653.1;ENST00000680663.1;ENST00000680762.1;ENST00000680899.1;ENST00000680989.1;ENST00000681172.1;EN…	5UTR;non_coding	393	118	122	9		316	87	74	5
chr12	103947811	103947812	bulges	+	chr12:103947783-103947811:+	FALSE	5'- GGGATTATGGGTCACAGGAAAAAGTGGGTTTTTTAGTT -3' rG4seq-K ----------------------------*---------	HSP90B1|ENSG00000166598.16	ENST00000299767.10;ENST00000548462.5;ENST00000550595.2;ENST00000614327.2;ENST00000679538.1;ENST00000679779.1;ENST00000679861.1;ENST00000680281.1;ENST00000680316.1;ENST00000680370.1;ENST00000680391.1;ENST00000680478.1;ENST00000680653.1;ENST00000680663.1;ENST00000680899.1;ENST00000680989.1;ENST00000681172.1;ENST00000681174.1;ENST00000681245.1;ENST00000681698.1;ENST00000681704.1;ENST00000681910.1;EN…	3UTR	86	34	70	3		74	34	32	0
chr12	110327592	110327593	two-quartet	+	chr12:110327570-110327592:+	FALSE	5'- GGGAAAGCTATGGGAGTGGTGGTAGCAACTGG -3' rG4seq-K ----------------------*---------	ATP2A2|ENSG00000174437.18	ENST00000308664.10;ENST00000377685.9;ENST00000539276.7;ENST00000547050.1;ENST00000548169.2	3UTR;CDS	26	13	7	0		16	8	11	0
chr12	120576810	120576813	potential G-quadruplex & G>=40%	+	chr12:120576753-120576813:+	FALSE	5'- AGTATTTGAGTTTGAACAGATTAGCTCTGGGGGGAGGGGGTTTCCACAATGTGAGGGGGAACCAAGAAAA -3' rG4seq-K ---------------------------------------------------------***----------	RNF10|ENSG00000022840.17	ENST00000325954.9;ENST00000413266.6;ENST00000535470.5;ENST00000538254.1;ENST00000542701.1;ENST00000544805.1;ENST00000545419.5	3UTR	106	32	51	2		58	23	26	0
chr13	73059066	73059068	bulges	+	chr13:73059029-73059066:+	FALSE	5'- GCGGTTCTCTCGCGGAGGTCGGCGGTGGCGGGAGCGGGCTCCGGAGA -3' rG4seq-K -------------------------------------**--------	KLF5|ENSG00000102554.14	ENST00000377687.6;ENST00000477333.5;ENST00000539231.5	5UTR	56	14	32	0		56	18	23	1
chr13	73059104	73059105	bulges	+	chr13:73059084-73059104:+	FALSE	5'- GCACGGTGGGGCGGGGCGGGAGAAAGTGGC -3' rG4seq-K --------------------*---------	KLF5|ENSG00000102554.14	ENST00000377687.6;ENST00000477333.5;ENST00000539231.5	5UTR	48	26	20	4		40	24	8	1
chr13	73076178	73076180	canonical/G3L1-7	+	chr13:73076155-73076179:+	FALSE	5'- GGGTAAGGGGTGGGGGTGGAGGGGAGTGTGTGCA -3' rG4seq-K -----------------------**---------	KLF5|ENSG00000102554.14	ENST00000377687.6;ENST00000539231.5	3UTR	217	114	56	14		168	92	38	4
chr13	95677215	95677216	two-quartet	+	chr13:95677191-95677215:+	FALSE	5'- GGAGCGCCGGCGCGTGCTGGTGGGCCACACACCT -3' rG4seq-K ------------------------*---------	DNAJC3|ENSG00000102580.15	ENST00000376795.6;ENST00000602402.6	5UTR	33	16	34	1		30	10	16	0
chr14	69771597	69771598	longloop	+	chr14:69771566-69771597:+	FALSE	5'- GGGTGGGATTTGGAAGGGGGGTTGGGTTGGGCTGGATATCT -3' rG4seq-K -------------------------------*---------	SRSF5|ENSG00000100650.16	ENST00000394366.6;ENST00000553521.5;ENST00000553635.5;ENST00000554465.5;ENST00000554929.1;ENST00000555547.5;ENST00000556184.5;ENST00000556587.5;ENST00000556647.1;ENST00000557154.6	3UTR	100	51	26	4		63	33	15	2
chr14	69771601	69771602	bulges	+	chr14:69771570-69771601:+	FALSE	5'- GGGATTTGGAAGGGGGGTTGGGTTGGGCTGGATATCTTTGT -3' rG4seq-K -------------------------------*---------	SRSF5|ENSG00000100650.16	ENST00000394366.6;ENST00000553521.5;ENST00000553635.5;ENST00000554465.5;ENST00000554929.1;ENST00000555547.5;ENST00000556184.5;ENST00000556587.5;ENST00000556647.1;ENST00000557154.6	3UTR	137	30	29	0		95	30	18	0
chr14	96502560	96502562	bulges	+	chr14:96502532-96502561:+	FALSE	5'- GGGCGGCAGCGGCGGCGGTTGCGGGGGGGAAGTGACTGG -3' rG4seq-K ----------------------------**---------	PAPOLA|ENSG00000090060.19	ENST00000216277.13;ENST00000392990.6;ENST00000553357.5;ENST00000553689.5;ENST00000554130.5;ENST00000554887.5;ENST00000556619.5;ENST00000557320.5;ENST00000557471.5;ENST00000618976.2	5UTR	27	19	19	4		20	15	6	1
chr15	39595839	39595840	bulges	+	chr15:39595807-39595839:+	FALSE	5'- GGGGAGCAGAGGCCAAAGCACTAAGGGGAGGGCGCATACCCG -3' rG4seq-K --------------------------------*---------	THBS1|ENSG00000137801.11	ENST00000260356.6	3UTR	38	19	38	2		32	20	22	0
chr15	44537219	44537223	bulges	+	chr15:44537196-44537219:+	FALSE	5'- GGCGGCGGCGGCGGCGGCGGCGGGGGACTCGGA -3' rG4seq-K -----------------------**-*------	EIF3J|ENSG00000104131.13	ENST00000261868.10;ENST00000424492.7;ENST00000535391.5	CDS	93	39	60	0		102	34	27	3
chr16	2707566	2707568	longloop	+	chr16:2707542-2707567:+	FALSE	5'- GGGTGGGCGCTGCCTCTTGGGGGGGCCTCGCTCTG -3' rG4seq-K ------------------------**---------	KCTD5|ENSG00000167977.9	ENST00000301738.9	3UTR	80	37	27	3		58	30	16	0
chr16	2771122	2771124	longloop	+	chr16:2771094-2771123:+	FALSE	5'- GGGAATGCAGATGGGAGTTGGGGGAGGGGAGGATACAGT -3' rG4seq-K ----------------------------**---------	SRRM2|ENSG00000167978.17	ENST00000301740.13;ENST00000570539.1;ENST00000573692.1;ENST00000574331.5;ENST00000630499.2	3UTR	42	26	37	1		53	23	14	0
chr16	3021951	3021952	two-quartet	+	chr16:3021935-3021951:+	FALSE	5'- GGGGGGTGGGGGGCGGTGAATCACCT -3' rG4seq-K ----------------*---------	TNFRSF12A|ENSG00000006327.14	ENST00000326577.9;ENST00000341627.5;ENST00000571351.1;ENST00000573001.5;ENST00000574699.1;ENST00000575124.1	3UTR;CDS	126	77	85	6		95	57	42	0
chr16	3022273	3022274	two-quartet	+	chr16:3022247-3022273:+	FALSE	5'- GGGGGCTGGCCCACTAGGAGGGCTGGCCCTAAGATA -3' rG4seq-K --------------------------*---------	TNFRSF12A|ENSG00000006327.14	ENST00000326577.9;ENST00000341627.5;ENST00000571351.1;ENST00000575124.1	3UTR	52	22	69	5		46	19	36	3
chr16	3022348	3022350	bulges	+	chr16:3022327-3022349:+	FALSE	5'- GGGGAGAGTTTGGAGGGGAGGGAGAATTTATT -3' rG4seq-K ---------------------**---------	TNFRSF12A|ENSG00000006327.14	ENST00000326577.9;ENST00000341627.5;ENST00000571351.1;ENST00000575124.1	3UTR	313	235	78	11		249	182	46	7
chr16	30659924	30659925	bulges	+	chr16:30659887-30659924:+	FALSE	5'- GAGGAGGAGCCTGAGGAGGAGGAAGAGGAGGAGGAGGACTTGATCGA -3' rG4seq-K -------------------------------------*---------	FBRS|ENSG00000156860.16	ENST00000356166.11;ENST00000498588.1;ENST00000543786.5	CDS	40	38	8	2		37	34	6	2
chr16	31184391	31184392	bulges	+	chr16:31184366-31184393:+	FALSE	5'- GTGGTGGTGGAGGTGGAGGTGGAGGTGGAGGTAACTA -3' rG4seq-K -------------------------*-----------	FUS|ENSG00000089280.19	ENST00000254108.12;ENST00000380244.7;ENST00000487509.6;ENST00000487974.1;ENST00000566605.5;ENST00000568685.1	CDS	36	30	46	23		42	37	16	7
chr16	31185026	31185027	two-quartet	+	chr16:31185015-31185026:+	FALSE	5'- GGTGGAGGTGGCAGCGGTGGC -3' rG4seq-K -----------*---------	FUS|ENSG00000089280.19	ENST00000254108.12;ENST00000380244.7;ENST00000487509.6;ENST00000566605.5;ENST00000568685.1	CDS	28	15	14	1		25	13	21	1
chr16	31185107	31185108	bulges	+	chr16:31185069-31185107:+	FALSE	5'- GGTGGCAGTGGTGGCGGCGGCGGCGGCGGCGGTGGTGGTTACAACCGC -3' rG4seq-K --------------------------------------*---------	FUS|ENSG00000089280.19	ENST00000254108.12;ENST00000380244.7;ENST00000487509.6;ENST00000566605.5;ENST00000568685.1;ENST00000570090.1	CDS	179	49	38	1		140	60	32	2
chr16	31185173	31185174	bulges	+	chr16:31185139-31185173:+	FALSE	5'- GAGGTCGTGGAGGTGGCCGTGGAGGCAGAGGTGGCATGGGGTAG -3' rG4seq-K ----------------------------------*---------	FUS|ENSG00000089280.19	ENST00000254108.12;ENST00000380244.7;ENST00000487509.6;ENST00000566605.5;ENST00000568685.1;ENST00000570090.1	CDS	39	28	23	3		21	15	10	1
chr16	31190275	31190276	bulges	+	chr16:31190107-31190141:+,chr16:31190274-31190275:+	TRUE	5'- GGTGGCAATGGTCGTGGAGGCCGAGGGCGAGGAGGACCCATGGGC -3' rG4seq-K -----------------------------------*---------	FUS|ENSG00000089280.19	ENST00000254108.12;ENST00000380244.7;ENST00000474990.5;ENST00000487509.6;ENST00000566605.5;ENST00000568685.1;ENST00000568901.2;ENST00000569760.5	3UTR;CDS	29	10	25	0		37	11	15	0
chr16	31190323	31190324	bulges	+	chr16:31190286-31190323:+	FALSE	5'- GTGGAGGCTATGGAGGTGGTGGCAGTGGTGGTGGTGGCCGAGGAGGA -3' rG4seq-K -------------------------------------*---------	FUS|ENSG00000089280.19	ENST00000254108.12;ENST00000380244.7;ENST00000474990.5;ENST00000487509.6;ENST00000566605.5;ENST00000568685.1;ENST00000569760.5	3UTR;CDS	54	38	32	8		71	49	16	6
chr16	31191071	31191074	bulges	+	chr16:31191042-31191073:+	FALSE	5'- GGAGGCTTCCGAGGGGGCCGGGGTGGTGGGGACAGAGGTGG -3' rG4seq-K -----------------------------***---------	FUS|ENSG00000089280.19	ENST00000254108.12;ENST00000380244.7;ENST00000474990.5;ENST00000483853.1;ENST00000487509.6;ENST00000566605.5;ENST00000568685.1;ENST00000569760.5	3UTR;CDS	256	123	108	11		184	104	98	7
chr16	31191083	31191084	bulges	+	chr16:31191054-31191083:+	FALSE	5'- GGGGGCCGGGGTGGTGGGGACAGAGGTGGCTTTGGCCCT -3' rG4seq-K -----------------------------*---------	FUS|ENSG00000089280.19	ENST00000254108.12;ENST00000380244.7;ENST00000474990.5;ENST00000483853.1;ENST00000487509.6;ENST00000566605.5;ENST00000568685.1;ENST00000569760.5	3UTR;CDS	187	32	40	0		165	33	28	0
chr16	69463349	69463350	two-quartet	+	chr16:69463331-69463349:+	FALSE	5'- GGGGGTGGAAAGGTAGGGATGAATTGGG -3' rG4seq-K ------------------*---------	CYB5B|ENSG00000103018.18	ENST00000307892.13;ENST00000515314.7;ENST00000684784.1;ENST00000686649.1;ENST00000687780.1;ENST00000688840.1;ENST00000689149.1;ENST00000691260.1;ENST00000692523.1;ENST00000692677.1	3UTR	42	41	14	3		32	30	6	0
chr16	85799740	85799741	longloop	+	chr16:85799707-85799740:+	FALSE	5'- GGGACACCGGGTGTAGAGGGCGGTCGCGGCGGGCAGTGGCGGC -3' rG4seq-K ---------------------------------*---------	COX4I1|ENSG00000131143.10	ENST00000253452.8;ENST00000561569.5;ENST00000562336.5;ENST00000563774.1;ENST00000564544.1;ENST00000565078.5;ENST00000566115.5;ENST00000566405.5;ENST00000567241.5;ENST00000567266.5;ENST00000568339.5;ENST00000568794.5;ENST00000570123.5	5UTR	65	63	13	4		52	46	11	1
chr16	89563129	89563130	canonical/G3L1-7	+	chr16:89563105-89563130:+	FALSE	5'- GGGAACAACTGGGCCTGGGATGGGGCTTCACTGCT -3' rG4seq-K ------------------------*----------	RPL13|ENSG00000167526.14	ENST00000311528.10;ENST00000393099.3;ENST00000452368.7;ENST00000472354.1;ENST00000562879.5	3UTR	27	22	11	0		16	14	7	2
chr16	89911232	89911234	bulges	+	chr16:89911204-89911233:+	FALSE	5'- GGACGACGCTGAGGGGGAGGGGGAGTGGGACTGAGCGTC -3' rG4seq-K ----------------------------**---------	ENSG00000267048|ENSG00000267048.1;TCF25|ENSG00000141002.20	ENST00000263346.13;ENST00000263347.11;ENST00000562256.5;ENST00000564957.5;ENST00000565860.1;ENST00000566283.1;ENST00000567171.1;ENST00000570116.6;ENST00000570217.1;ENST00000640279.1	3UTR;CDS;non_coding	41	33	21	2		30	28	12	0
chr17	7220043	7220044	two-quartet	+	chr17:7220030-7220043:+	FALSE	5'- GGCTCGGGGGCGGAAGGTCTGTG -3' rG4seq-K -------------*---------	ACADVL|ENSG00000072778.20	ENST00000322910.9;ENST00000350303.9;ENST00000356839.10;ENST00000543245.6;ENST00000577191.5;ENST00000577857.5;ENST00000578269.5;ENST00000578421.1;ENST00000579286.5;ENST00000579886.2;ENST00000580263.5;ENST00000581562.5;ENST00000582056.5;ENST00000582356.5;ENST00000583312.5;ENST00000584103.5	CDS	18	12	12	1		26	18	10	1
chr17	7222291	7222292	two-quartet	+	chr17:7222272-7222293:+	FALSE	5'- GGTGGAGAGGGGCTTCGGGGGCATTACCCAG -3' rG4seq-K -------------------*-----------	ACADVL|ENSG00000072778.20	ENST00000322910.9;ENST00000350303.9;ENST00000356839.10;ENST00000543245.6;ENST00000577191.5;ENST00000581378.5;ENST00000582379.1	3UTR;CDS	23	12	6	0		17	10	13	0
chr17	7222769	7222770	bulges	+	chr17:7222734-7222769:+	FALSE	5'- GGGTGCCATCGGAGAACGTGCTGGGTGAGGTTGGGAGTGGCTTCA -3' rG4seq-K -----------------------------------*---------	ACADVL|ENSG00000072778.20	ENST00000322910.9;ENST00000350303.9;ENST00000356839.10;ENST00000543245.6;ENST00000578824.5;ENST00000581378.5;ENST00000582379.1;ENST00000583858.5	3UTR;CDS	16	13	6	0		13	8	6	0
chr17	7222774	7222775	bulges	+	chr17:7222735-7222774:+	FALSE	5'- GGTGCCATCGGAGAACGTGCTGGGTGAGGTTGGGAGTGGCTTCAAGGTT -3' rG4seq-K ---------------------------------------*---------	ACADVL|ENSG00000072778.20	ENST00000322910.9;ENST00000350303.9;ENST00000356839.10;ENST00000543245.6;ENST00000578824.5;ENST00000581378.5;ENST00000582379.1;ENST00000583858.5	3UTR;CDS	66	50	6	0		46	31	8	0
chr17	7224335	7224336	longloop	+	chr17:7224059-7224069:+,chr17:7224320-7224335:+	TRUE	5'- GGGCTGTATGGCGGGCAGGGCTGGGCAGCGGCCTG -3' rG4seq-K -------------------------*---------	ACADVL|ENSG00000072778.20	ENST00000322910.9;ENST00000350303.9;ENST00000356839.10;ENST00000542255.6;ENST00000543245.6;ENST00000578319.5;ENST00000578711.1;ENST00000578809.5;ENST00000579391.1;ENST00000579425.5;ENST00000579546.1;ENST00000579894.5;ENST00000582450.1;ENST00000583074.5;ENST00000583850.5;ENST00000583858.5;ENST00000585203.6	3UTR;CDS	111	97	19	0		92	82	6	1
chr17	7578909	7578911	bulges	+	chr17:7578878-7578910:+	FALSE	5'- GGGGGTTGTCCCCAGGTGGGGGGAAGCAGGGGAGAGAAAATG -3' rG4seq-K -------------------------------**---------	EIF4A1|ENSG00000161960.16;ENSG00000264772|ENSG00000264772.6	ENST00000293831.13;ENST00000581621.1;ENST00000582746.5	3UTR;non_coding	72	27	71	0		59	16	41	1
chr17	28749931	28749932	canonical/G3L1-7	+	chr17:28749910-28749931:+	FALSE	5'- GGGGGTGGGAATTGGGGAGGGAGAAAGGGTA -3' rG4seq-K ---------------------*---------	TRAF4|ENSG00000076604.16	ENST00000262395.10;ENST00000444415.7	3UTR;CDS	42	40	9	3		24	23	6	1
chr17	35726365	35726366	canonical/G3L1-7	+	chr17:35726347-35726367:+	FALSE	5'- GGGAGGGTGGGGGTTGGGGGAAGCTTGACC -3' rG4seq-K ------------------*-----------	AP2B1|ENSG00000006125.18	ENST00000610402.5;ENST00000621914.4	3UTR	27	25	14	3		14	10	8	1
chr17	38921202	38921203	canonical/G3L1-7	+	chr17:38921183-38921202:+	FALSE	5'- GGGGCTGGGCTGGGCTGGGCTGAGCCCCT -3' rG4seq-K -------------------*---------	LASP1|ENSG00000002834.18	ENST00000318008.11;ENST00000433206.6;ENST00000435347.7	3UTR	29	24	6	1		22	20	7	1
chr17	45149961	45149962	canonical/G3L1-7	+	chr17:45149939-45149962:+	FALSE	5'- GGGCAGCGATGGGATGGGAGGGGACGGCAGCGA -3' rG4seq-K ----------------------*----------	HEXIM1|ENSG00000186834.4	ENST00000332499.4	CDS	38	34	16	1		41	38	8	1
chr17	45150302	45150304	two-quartet	+	chr17:45150284-45150303:+	FALSE	5'- GGGGGAGGGGGCAAAGGGGACTTTTTACA -3' rG4seq-K ------------------**---------	HEXIM1|ENSG00000186834.4	ENST00000332499.4	3UTR	65	31	31	2		53	23	12	0
chr17	47650073	47650074	bulges	+	chr17:47650042-47650074:+	FALSE	5'- GGGAGGAAGTAAGGGAAGAGGAGAGGAAGGGGAGCCGGACCG -3' rG4seq-K -------------------------------*----------	KPNB1|ENSG00000108424.11	ENST00000290158.9;ENST00000535458.6;ENST00000583648.6	5UTR	35	26	10	1		25	17	6	1
chr17	82237634	82237635	bulges	+	chr17:82237612-82237634:+	FALSE	5'- GGGCTTCGTGGCGGGGCTTGGGAAGGTGCGGC -3' rG4seq-K ----------------------*---------	SLC16A3|ENSG00000141526.18	ENST00000392339.6;ENST00000392341.6;ENST00000577650.6;ENST00000578684.6;ENST00000580098.6;ENST00000580189.6;ENST00000581287.5;ENST00000582715.1;ENST00000582743.6;ENST00000583025.1;ENST00000584689.6;ENST00000617373.5;ENST00000619321.2	CDS	37	20	13	2		30	26	7	0
chr17	82239005	82239006	bulges	+	chr17:82238982-82239005:+	FALSE	5'- GGGCGGGGCCGGCAGGCACAGGGAGGAGGTACA -3' rG4seq-K -----------------------*---------	SLC16A3|ENSG00000141526.18	ENST00000392339.6;ENST00000392341.6;ENST00000577650.6;ENST00000578684.6;ENST00000580098.6;ENST00000580189.6;ENST00000581287.5;ENST00000582715.1;ENST00000582743.6;ENST00000583025.1;ENST00000584689.6;ENST00000617373.5;ENST00000619321.2	3UTR	13	11	9	1		19	14	6	1
chr17	82239144	82239146	bulges	+	chr17:82239124-82239145:+	FALSE	5'- GGGGGAAGGTGGCGGGGTGGGAACCGTGTCA -3' rG4seq-K --------------------**---------	SLC16A3|ENSG00000141526.18	ENST00000392339.6;ENST00000392341.6;ENST00000577650.6;ENST00000578684.6;ENST00000580098.6;ENST00000580189.6;ENST00000581287.5;ENST00000582715.1;ENST00000582743.6;ENST00000583025.1;ENST00000584689.6;ENST00000617373.5;ENST00000619321.2	3UTR	79	62	29	2		65	53	6	1
chr17	82239316	82239317	canonical/G3L1-7	+	chr17:82239301-82239316:+	FALSE	5'- GGGAGGGTGGGTGGGCCGCAGACAG -3' rG4seq-K ---------------*---------	SLC16A3|ENSG00000141526.18	ENST00000392339.6;ENST00000392341.6;ENST00000577650.6;ENST00000578684.6;ENST00000580098.6;ENST00000580189.6;ENST00000581287.5;ENST00000582715.1;ENST00000582743.6;ENST00000583025.1;ENST00000584689.6;ENST00000617373.5;ENST00000619321.2	3UTR	45	43	20	14		37	37	10	3
chr19	811227	811229	canonical/G3L1-7	+	chr19:811196-811228:+	FALSE	5'- GGGGTGTCCTGGGGACCCAAGGGGTGGGGGGGTCACACCAGA -3' rG4seq-K -------------------------------**---------	PTBP1|ENSG00000011304.22	ENST00000349038.8;ENST00000350092.8;ENST00000356948.11;ENST00000394601.8;ENST00000586944.5;ENST00000627714.2;ENST00000635647.1;ENST00000676227.1;ENST00000677277.1;ENST00000679114.1	3UTR	30	13	32	3		25	10	24	1
chr19	1271600	1271601	potential G-quadruplex & G>=40%	+	chr19:1271541-1271601:+	FALSE	5'- TATGTGCAGGAGGAGGGGACCGAGGCTATGGGGGGAACCGGTTCGAGTCCAGGAGTGGGGGCTACGGAGG -3' rG4seq-K -----------------------------------------------------------*----------	CIRBP|ENSG00000099622.14	ENST00000320936.9;ENST00000413636.6;ENST00000585630.5;ENST00000585913.5;ENST00000585914.5;ENST00000586472.5;ENST00000586548.5;ENST00000586636.5;ENST00000586773.5;ENST00000587169.5;ENST00000587323.5;ENST00000587896.6;ENST00000588030.5;ENST00000588090.5;ENST00000588230.5;ENST00000588344.2;ENST00000589235.5;ENST00000589686.5;ENST00000589710.5;ENST00000590171.1;ENST00000590347.5;ENST00000590704.5;ENS…	3UTR;CDS	19	8	16	0		9	6	10	0
chr19	8485615	8485616	two-quartet	+	chr19:8474230-8474244:+,chr19:8485602-8485615:+	TRUE	5'- GGGCAGGATAAATGGTGGAGGTGGAGGAAGCGTCCCT -3' rG4seq-K ---------------------------*---------	HNRNPM|ENSG00000099783.12	ENST00000325495.9;ENST00000348943.7;ENST00000594907.5;ENST00000597081.1;ENST00000597270.1;ENST00000598367.5;ENST00000598603.1;ENST00000600092.5;ENST00000600806.5;ENST00000620401.4	3UTR;CDS	14	8	20	1		14	10	9	1
chr19	10687412	10687413	bulges	+	chr19:10687384-10687412:+	FALSE	5'- GTGGCGGTGGCGGCGGGGGCGGTGGTGGCTCCTCCGGC -3' rG4seq-K ----------------------------*---------	ILF3|ENSG00000129351.17	ENST00000449870.5;ENST00000587928.5;ENST00000588657.5;ENST00000590261.5;ENST00000590869.1;ENST00000591649.5	CDS	71	49	20	2		39	34	10	4
chr19	12943803	12943804	two-quartet	+	chr19:12943792-12943803:+	FALSE	5'- GGAGGAGGAGGCAGAGGACAA -3' rG4seq-K -----------*---------	CALR|ENSG00000179218.15	ENST00000316448.10;ENST00000586760.2;ENST00000586803.1;ENST00000586967.2;ENST00000588454.6;ENST00000680816.1	3UTR;CDS	70	47	78	20		50	35	48	14
chr19	12943818	12943819	bulges	+	chr19:12943790-12943818:+	FALSE	5'- GAGGAGGAGGAGGCAGAGGACAAGGAGGATGATGAGGA -3' rG4seq-K ----------------------------*---------	CALR|ENSG00000179218.15	ENST00000316448.10;ENST00000586760.2;ENST00000586803.1;ENST00000586967.2;ENST00000588454.6;ENST00000680816.1	3UTR;CDS	158	71	109	5		120	50	68	2
chr19	12943866	12943867	bulges	+	chr19:12943835-12943866:+	FALSE	5'- GAGGATGAGGAGGATGAGGAGGACAAGGAGGAAGATGAGGA -3' rG4seq-K -------------------------------*---------	CALR|ENSG00000179218.15	ENST00000316448.10;ENST00000586760.2;ENST00000586803.1;ENST00000586967.2;ENST00000588454.6;ENST00000680816.1	3UTR;CDS	143	112	66	10		94	74	26	3
chr19	12943878	12943879	bulges	+	chr19:12943841-12943878:+	FALSE	5'- GAGGAGGATGAGGAGGACAAGGAGGAAGATGAGGAGGAAGATGTCCC -3' rG4seq-K -------------------------------------*---------	CALR|ENSG00000179218.15	ENST00000316448.10;ENST00000586760.2;ENST00000586803.1;ENST00000586967.2;ENST00000588454.6;ENST00000680816.1	3UTR;CDS	342	146	93	13		271	138	42	10
chr19	12944418	12944419	longloop	+	chr19:12944392-12944418:+	FALSE	5'- GGGCCACTTCTGGGTGGGGCAGTGGGTCCCAGATTG -3' rG4seq-K --------------------------*---------	CALR|ENSG00000179218.15	ENST00000316448.10;ENST00000586760.2;ENST00000586967.2;ENST00000588454.6	3UTR	143	44	162	25		123	41	80	12
chr19	13154472	13154473	potential G-quadruplex & G>=40%	+	chr19:13154413-13154473:+	FALSE	5'- TGCGTGGGTGTGGGGCCTGGGAGGAGGTCCTGGGGCGTGCACCCGCCCTGGGCAGTGGGGAGGAGAGTGG -3' rG4seq-K -----------------------------------------------------------*----------	IER2|ENSG00000160888.7	ENST00000292433.4;ENST00000588173.1	3UTR	16	12	15	3		28	19	11	0
chr19	16101861	16101862	bulges	+	chr19:16101836-16101861:+	FALSE	5'- GGGGGCCGGGGGTGGCTATTGTGGGAAGTCATAAC -3' rG4seq-K -------------------------*---------	TPM4|ENSG00000167460.17	ENST00000300933.9;ENST00000344824.11;ENST00000586193.6;ENST00000586499.6;ENST00000586833.7;ENST00000588032.6;ENST00000588483.2;ENST00000590180.3;ENST00000591226.2;ENST00000591645.3;ENST00000642221.1;ENST00000642789.1;ENST00000643494.1;ENST00000643579.2;ENST00000645471.1;ENST00000646575.1;ENST00000646974.2;ENST00000647037.1;ENST00000647464.2;ENST00000653961.1;ENST00000653979.1;ENST00000655004.1;EN…	3UTR	70	53	6	2		42	31	9	1
chr19	38292041	38292043	bulges	+	chr19:38292021-38292042:+	FALSE	5'- GAGGACTGGGGAAGGGAGGGGAGACTATGTG -3' rG4seq-K --------------------**---------	ENSG00000267748|ENSG00000267748.4;SPINT2|ENSG00000167642.13	ENST00000301244.12;ENST00000454580.7;ENST00000585357.1;ENST00000587090.5;ENST00000587334.1;ENST00000587519.4;ENST00000591889.2	3UTR;non_coding	264	144	73	3		204	111	37	3
chr19	38729575	38729576	canonical/G3L1-7	+	chr19:38729549-38729576:+	FALSE	5'- GGGTGGGTGGGCAGGGAGGGGCTGGGGCAGGCTCTCT -3' rG4seq-K --------------------------*----------	ACTN4|ENSG00000130402.13	ENST00000252699.7;ENST00000440400.2;ENST00000497637.5;ENST00000589528.1	3UTR	51	19	20	2		39	13	14	0
chr19	38729580	38729581	bulges	+	chr19:38729545-38729580:+	FALSE	5'- GGGTGGGTGGGTGGGCAGGGAGGGGCTGGGGCAGGCTCTCTCCTC -3' rG4seq-K -----------------------------------*---------	ACTN4|ENSG00000130402.13	ENST00000252699.7;ENST00000440400.2;ENST00000497637.5;ENST00000589528.1	3UTR	101	37	26	2		80	21	18	0
chr19	38730384	38730385	bulges	+	chr19:38730350-38730384:+	FALSE	5'- GGGTCTCTGGGGACCCTCCAGAGGTGGAGGTGGGCTGATGGCCT -3' rG4seq-K ----------------------------------*---------	ACTN4|ENSG00000130402.13	ENST00000252699.7;ENST00000440400.2	3UTR	32	20	28	7		26	18	14	1
chr19	41302935	41302936	bulges	+	chr19:41302910-41302935:+	FALSE	5'- GAGGGGGAGGCAGCGGTGGAGGAGGCAACTACCGA -3' rG4seq-K -------------------------*---------	HNRNPUL1|ENSG00000105323.18	ENST00000263367.7;ENST00000352456.7;ENST00000378215.8;ENST00000392006.8;ENST00000593587.5;ENST00000595018.5;ENST00000595196.5;ENST00000595806.1;ENST00000599614.5;ENST00000602130.5;ENST00000617774.1	3UTR;CDS	26	20	6	1		19	13	6	0
chr19	48873751	48873752	bulges	+	chr19:48873722-48873753:+	FALSE	5'- GAGGAAGAGGGAGTTGCTGAAGAGGAGGGAGTTAACAAGTT -3' rG4seq-K -----------------------------*-----------	PPP1R15A|ENSG00000087074.8	ENST00000200453.6	CDS	101	63	44	6		75	47	22	1
chr19	48874186	48874189	two-quartet	+	chr19:48874162-48874188:+	FALSE	5'- GGAGGGTGAGGTCAAGGCTTTGGGGGCAGCTGAGAA -3' rG4seq-K ------------------------***---------	PPP1R15A|ENSG00000087074.8	ENST00000200453.6	CDS	96	39	51	3		105	28	32	1
chr19	48966695	48966696	bulges	+	chr19:48966671-48966695:+	FALSE	5'- GGGTGGCCCGGAGGCTGGGCTGGGCGAGTATCTC -3' rG4seq-K ------------------------*---------	FTL|ENSG00000087086.15	ENST00000331825.11	CDS	100	16	151	2		84	16	97	2
chr19	49688369	49688371	canonical/G3L1-7	+	chr19:49688346-49688369:+	FALSE	5'- GGGGCCTGGGCTGGGGGGATGGGGAGGGCACAT -3' rG4seq-K -----------------------**--------	PRMT1|ENSG00000126457.22	ENST00000391851.8;ENST00000454376.7;ENST00000527866.1;ENST00000530361.5;ENST00000532489.5;ENST00000610806.4	3UTR	120	51	25	4		79	32	26	3
chr19	49688374	49688375	canonical/G3L1-7	+	chr19:49688346-49688374:+	FALSE	5'- GGGGCCTGGGCTGGGGGGATGGGGAGGGCACATCGTGA -3' rG4seq-K ----------------------------*---------	PRMT1|ENSG00000126457.22	ENST00000391851.8;ENST00000454376.7;ENST00000527866.1;ENST00000530361.5;ENST00000532489.5;ENST00000610806.4	3UTR	151	67	30	7		112	57	18	2
chr2	20448537	20448539	canonical/G3L1-7	+	chr2:20448507-20448538:+	FALSE	5'- GGGAGGGGAGGGCTGCTGGGGAGGATGGGGGGATGTTATAT -3' rG4seq-K ------------------------------**---------	RHOB|ENSG00000143878.10	ENST00000272233.6	3UTR	184	95	46	4		126	51	22	3
chr2	53787224	53787225	bulges	+	chr2:53787190-53787226:+	FALSE	5'- GGAGAAAGCGGCGGCGGAGGATGGAGGAAGGAGGCGGCGGCGTACG -3' rG4seq-K ----------------------------------*-----------	ERLEC1|ENSG00000068912.15	ENST00000185150.9;ENST00000378239.5;ENST00000405123.7;ENST00000494373.2;ENST00000684875.1;ENST00000685400.1;ENST00000685508.1;ENST00000686424.1;ENST00000687536.1;ENST00000687552.1;ENST00000687723.1;ENST00000688096.1;ENST00000688147.1;ENST00000688274.1;ENST00000688464.1;ENST00000689100.1;ENST00000689106.1;ENST00000689291.1;ENST00000689496.1;ENST00000689887.1;ENST00000689943.1;ENST00000690020.1;ENS…	5UTR;CDS	18	15	10	1		11	9	7	0
chr2	73251252	73251253	two-quartet	+	chr2:73251236-73251253:+	FALSE	5'- GGTGGCTGGTGGCGGGGCCATTGAGAT -3' rG4seq-K ----------------*----------	CCT7|ENSG00000135624.17	ENST00000258091.10;ENST00000398422.2;ENST00000539919.5;ENST00000540468.5	CDS	40	29	10	1		48	38	10	0
chr2	119372409	119372410	two-quartet	+	chr2:119372391-119372409:+	FALSE	5'- GGATGGTGGGAATTCGGGAAAATAACCA -3' rG4seq-K ------------------*---------	DBI|ENSG00000155368.18	ENST00000311521.8;ENST00000355857.8;ENST00000393103.2;ENST00000409094.5;ENST00000460901.1;ENST00000475783.1;ENST00000535617.5;ENST00000535757.5;ENST00000627093.2;ENST00000627305.2	3UTR	29	21	13	1		27	19	8	1
chr2	170966437	170966438	two-quartet	+	chr2:170966419-170966438:+	FALSE	5'- GGGAAAGGTGGTGGCGGGGCGTCCACTAG -3' rG4seq-K ------------------*----------	GORASP2|ENSG00000115806.13	ENST00000234160.5;ENST00000442798.5;ENST00000486498.1	3UTR	24	21	17	6		20	17	7	1
chr2	172506003	172506004	two-quartet	+	chr2:172505986-172506003:+	FALSE	5'- GGGTGTTGGGAGGGTGGTTCAACAAAG -3' rG4seq-K -----------------*---------	ITGA6|ENSG00000091409.16	ENST00000264107.12;ENST00000409080.6;ENST00000442250.6;ENST00000684293.1	3UTR	52	49	7	2		44	42	7	2
chr2	235053913	235053914	two-quartet	+	chr2:235053887-235053913:+	FALSE	5'- GGAGCTGAAGAGGGAGGAAGGGGCGGCTGCTCAGAC -3' rG4seq-K --------------------------*---------	SH3BP4|ENSG00000130147.16	ENST00000344528.8;ENST00000392011.7;ENST00000409212.5	3UTR	21	14	7	0		21	16	6	0
chr2	241350152	241350155	bulges	+	chr2:241350131-241350154:+	FALSE	5'- GGGCGGGGATGGCGATGGCGGGGCTCTCGGGCA -3' rG4seq-K ---------------------***---------	SEPTIN2|ENSG00000168385.18	ENST00000360051.7;ENST00000391971.7;ENST00000391973.6;ENST00000401990.5;ENST00000402092.6;ENST00000407971.5;ENST00000421717.1;ENST00000451310.1;ENST00000616972.4	CDS	62	31	31	2		90	37	38	4
chr2	241350162	241350163	longloop	+	chr2:241350131-241350162:+	FALSE	5'- GGGCGGGGATGGCGATGGCGGGGCTCTCGGGCACCACGTGT -3' rG4seq-K -------------------------------*---------	SEPTIN2|ENSG00000168385.18	ENST00000360051.7;ENST00000391971.7;ENST00000391973.6;ENST00000401990.5;ENST00000402092.6;ENST00000407971.5;ENST00000421717.1;ENST00000451310.1;ENST00000616972.4	CDS	87	45	12	2		83	34	15	0
chr20	409937	409938	two-quartet	+	chr20:409914-409937:+	FALSE	5'- GGCGGGCGGGGATGAACAGGTGGCAATGAAGTG -3' rG4seq-K -----------------------*---------	RBCK1|ENSG00000125826.21	ENST00000353660.7;ENST00000356286.10;ENST00000382181.2;ENST00000382214.7;ENST00000400245.3;ENST00000400247.3;ENST00000411647.5;ENST00000414880.1;ENST00000415942.5;ENST00000441733.5;ENST00000475269.5;ENST00000640614.1	5UTR;CDS	20	11	14	0		28	17	6	0
chr20	34080231	34080232	bulges	+	chr20:34080205-34080232:+	FALSE	5'- GGTTTGGCGGGGGGCCACAGGGAGGGGACCCTGACAA -3' rG4seq-K --------------------------*----------	RALY|ENSG00000125970.12	ENST00000246194.8;ENST00000375114.7;ENST00000489384.1	3UTR	44	39	12	0		23	22	6	0
chr20	36605976	36605977	bulges	+	chr20:36605946-36605978:+	FALSE	5'- GGAGGATGAGCGGCGGGCGGCGGAAGGAGGAGCCGCCTCAGC -3' rG4seq-K ------------------------------*-----------	RAB5IF|ENSG00000101084.19;TGIF2-RAB5IF|ENSG00000259399.1	ENST00000342422.3;ENST00000344795.8;ENST00000373852.9;ENST00000483815.5;ENST00000491113.1;ENST00000492721.5;ENST00000558530.1	5UTR;CDS;non_coding	19	8	9	0		19	12	10	0
chr20	41124032	41124033	canonical/G3L1-7	+	chr20:41124010-41124032:+	FALSE	5'- GGGGTTGGGGAGGGATGAAGGGCGAGTGAATC -3' rG4seq-K ----------------------*---------	TOP1|ENSG00000198900.7	ENST00000361337.3;ENST00000680945.1;ENST00000681058.1;ENST00000681113.1;ENST00000681392.1;ENST00000681884.1	3UTR	79	77	19	7		64	61	11	6
chr20	44906428	44906429	bulges	+	chr20:44906401-44906428:+	FALSE	5'- GGGAGACGAAGGAGACGCTGGGGAGGGAGAGAACTAA -3' rG4seq-K ---------------------------*---------	YWHAB|ENSG00000166913.13	ENST00000353703.9;ENST00000372839.7;ENST00000479421.5;ENST00000631616.1	3UTR;CDS	21	16	20	2		18	15	6	1
chr20	58898954	58898955	two-quartet	+	chr20:58895670-58895684:+,chr20:58898940-58898954:+	TRUE	5'- GGGTTTAATGGAGAGGGCGGCGAAGAGGACCCGCAGGC -3' rG4seq-K ----------------------------*---------	GNAS|ENSG00000087460.29	ENST00000265620.11;ENST00000306090.12;ENST00000313949.11;ENST00000338783.7;ENST00000349036.9;ENST00000354359.12;ENST00000371075.7;ENST00000371081.5;ENST00000371085.8;ENST00000371095.7;ENST00000371098.6;ENST00000371100.9;ENST00000371102.8;ENST00000419558.7;ENST00000423897.7;ENST00000453292.7;ENST00000461152.6;ENST00000462499.6;ENST00000464624.7;ENST00000464788.6;ENST00000464960.5;ENST00000467227.6…	3UTR;5UTR;CDS	34	17	17	0		23	11	7	0
chr20	62307380	62307381	bulges	+	chr20:62306718-62306734:+,chr20:62307370-62307382:+	TRUE	5'- GGCCTTGGAGGACTGGGTGGGCTGGGGGCCCTGACTGG -3' rG4seq-K --------------------------*-----------	ADRM1|ENSG00000130706.13	ENST00000253003.7;ENST00000462554.2;ENST00000465805.2;ENST00000491935.5;ENST00000620230.4	CDS	30	24	6	0		26	23	6	0
chr20	63890216	63890217	bulges	+	chr20:63890187-63890216:+	FALSE	5'- GGGGTGCAGGAAGTGGACAGGGCGGAGGGTTTGAAAGAA -3' rG4seq-K -----------------------------*---------	TPD52L2|ENSG00000101150.18	ENST00000217121.9;ENST00000346249.9;ENST00000348257.9;ENST00000351424.8;ENST00000352482.8;ENST00000358548.4;ENST00000369927.8;ENST00000474176.2;ENST00000611972.4;ENST00000615907.4	3UTR	23	18	14	2		19	12	6	0
chr20	63891044	63891046	bulges	+	chr20:63891020-63891045:+	FALSE	5'- GGTCAGGTGGAGGGTGGGGCGTGGGCATCAGCCAG -3' rG4seq-K ------------------------**---------	TPD52L2|ENSG00000101150.18	ENST00000217121.9;ENST00000346249.9;ENST00000348257.9;ENST00000351424.8;ENST00000352482.8;ENST00000358548.4;ENST00000474176.2;ENST00000611972.4;ENST00000615907.4	3UTR	93	68	30	6		97	66	30	1
chr22	21642989	21642990	bulges	+	chr22:21642954-21642989:+	FALSE	5'- GCGGGTCCCCGGTGCGCTGCGGGCAGGCGGTGAGGCTCACGCATG -3' rG4seq-K -----------------------------------*---------	SDF2L1|ENSG00000128228.5	ENST00000248958.5;ENST00000466935.1	CDS	47	22	37	3		42	20	26	0
chr22	21644214	21644216	bulges	+	chr22:21644179-21644217:+	FALSE	5'- GTGGATGGATGGGTGGATGGAGGGTGGCAGGTGGGGCGTCTGCAGGGC -3' rG4seq-K -----------------------------------**-----------	SDF2L1|ENSG00000128228.5	ENST00000248958.5	3UTR	198	104	52	8		160	82	43	7
chr22	37566526	37566527	bulges	+	chr22:37566501-37566527:+	FALSE	5'- GGGCCGTGGCGGGGATGTCTTCGGGGACACGTCCTT -3' rG4seq-K -------------------------*----------	CDC42EP1|ENSG00000128283.7	ENST00000249014.5;ENST00000415670.1;ENST00000430687.1	CDS	12	6	11	0		9	6	7	0
chr22	37807126	37807128	canonical/G3L1-7	+	chr22:37807102-37807127:+	FALSE	5'- GGGAGGGGGAGGGGGAGTGGGCGGGCAGTGGATAG -3' rG4seq-K ------------------------**---------	H1-0|ENSG00000189060.6	ENST00000340857.4	3UTR	107	82	51	8		94	75	22	2
chr22	49922696	49922697	bulges	+	chr22:49922661-49922698:+	FALSE	5'- GGCGAGTGTGAAGTGGGCTGGGTGCTGGACGAGGGCGCCTGTGTGGA -3' rG4seq-K -----------------------------------*-----------	CRELD2|ENSG00000184164.15	ENST00000328268.9;ENST00000403427.3;ENST00000404488.7;ENST00000407217.7;ENST00000444954.1;ENST00000450207.5;ENST00000462253.5;ENST00000482956.5;ENST00000483652.5	CDS	41	33	12	0		40	30	8	0
chr3	5219467	5219468	longloop	+	chr3:5219433-5219467:+	FALSE	5'- GGGACCCCTTGGGAAATCGAGGAGGTGGGACGGGCTGGGCCCTG -3' rG4seq-K ----------------------------------*---------	EDEM1|ENSG00000134109.11	ENST00000256497.9	3UTR	20	18	16	4		21	20	10	1
chr3	5219503	5219504	longloop	+	chr3:5219459-5219503:+	FALSE	5'- GGGACGGGCTGGGCCCTGTGTCCCAGGTTTCACAGGGCTCAGGGTTATGCTCCC -3' rG4seq-K --------------------------------------------*---------	EDEM1|ENSG00000134109.11	ENST00000256497.9	3UTR	66	31	21	1		45	21	17	0
chr3	9806673	9806674	two-quartet	+	chr3:9806655-9806673:+	FALSE	5'- GGTGGGGAGGGAGGGAGGTTTCAGACTC -3' rG4seq-K ------------------*---------	ARPC4-TTLL3|ENSG00000250151.9;ARPC4|ENSG00000241553.13	ENST00000397256.5;ENST00000397261.8;ENST00000418163.5;ENST00000424442.5;ENST00000453882.1	3UTR;non_coding	32	21	17	0		37	21	9	0
chr3	128071582	128071583	bulges	+	chr3:128071559-128071584:+	FALSE	5'- GATGGTCACGGTGGGTGGGTGGGGGCTGACCCCAG -3' rG4seq-K -----------------------*-----------	SEC61A1|ENSG00000058262.10	ENST00000243253.8;ENST00000424880.2;ENST00000483956.1	3UTR	90	72	34	10		98	83	15	5
chr3	133574202	133574203	canonical/G3L1-7	+	chr3:133574178-133574202:+	FALSE	5'- GGGTGCGGCGGGCGGCGGGGCGGGCGCGGGGACC -3' rG4seq-K ------------------------*---------	CDV3|ENSG00000091527.17	ENST00000264993.8;ENST00000431519.6;ENST00000503932.6;ENST00000688838.1	CDS	28	25	6	1		28	24	6	0
chr3	133584082	133584083	two-quartet	+	chr3:133584054-133584082:+	FALSE	5'- GGGAAGAAGGTGGAGGTGGTGGTGGAGGTATGGAAAAA -3' rG4seq-K ----------------------------*---------	CDV3|ENSG00000091527.17	ENST00000264993.8;ENST00000420115.6;ENST00000431519.6;ENST00000503932.6;ENST00000504867.5;ENST00000507408.5;ENST00000508481.5;ENST00000511392.5;ENST00000515421.1;ENST00000688838.1	3UTR;CDS	20	18	21	4		10	8	16	4
chr3	133588779	133588780	longloop	+	chr3:133588749-133588779:+	FALSE	5'- GGGGTCCACCAAGTGGGGGAAGGGGAAGGGAGAGAATAAT -3' rG4seq-K ------------------------------*---------	CDV3|ENSG00000091527.17	ENST00000264993.8;ENST00000420115.6;ENST00000515421.1;ENST00000688838.1	3UTR	17	15	12	0		17	15	6	0
chr3	133819716	133819718	bulges	+	chr3:133819696-133819717:+	FALSE	5'- GGGTGGAAGAGGGGACGTGGGCTCTGCTGAC -3' rG4seq-K --------------------**---------	SRPRB|ENSG00000144867.13	ENST00000466490.7;ENST00000466636.1;ENST00000481356.1;ENST00000678299.1	CDS	69	38	23	0		47	31	14	0
chr3	184327300	184327302	bulges	+	chr3:184327272-184327301:+	FALSE	5'- GCGGAGTGAACGGGGAGGGGACCGTGGGGACCGGCTTGA -3' rG4seq-K ----------------------------**---------	EIF4G1|ENSG00000114867.22	ENST00000342981.8;ENST00000346169.7;ENST00000350481.9;ENST00000352767.7;ENST00000382330.7;ENST00000392537.6;ENST00000411531.5;ENST00000414031.5;ENST00000424196.5;ENST00000427845.5;ENST00000434061.6;ENST00000435046.7;ENST00000441154.5;ENST00000442406.5;ENST00000448284.1;ENST00000482303.1;ENST00000676453.1	3UTR;CDS	86	51	30	0		114	64	22	0
chr3	184327441	184327443	bulges	+	chr3:184327412-184327442:+	FALSE	5'- GCCTCACGGAGGATCGGGACCGTGGGCGGGATGCCGTGAA -3' rG4seq-K -----------------------------**---------	EIF4G1|ENSG00000114867.22	ENST00000342981.8;ENST00000346169.7;ENST00000350481.9;ENST00000352767.7;ENST00000382330.7;ENST00000392537.6;ENST00000411531.5;ENST00000414031.5;ENST00000424196.5;ENST00000427845.5;ENST00000434061.6;ENST00000435046.7;ENST00000441154.5;ENST00000442406.5;ENST00000482303.1;ENST00000676453.1	3UTR;CDS	40	23	34	0		28	13	14	0
chr3	184335201	184335203	bulges	+	chr3:184335167-184335201:+	FALSE	5'- GGGGTGGGGAGGGGCACCAACGCCTGCCCCTGGGGTCCTTTTTT -3' rG4seq-K ----------------------------------**--------	EIF4G1|ENSG00000114867.22	ENST00000342981.8;ENST00000346169.7;ENST00000350481.9;ENST00000352767.7;ENST00000392537.6;ENST00000414031.5;ENST00000424196.5;ENST00000434061.6;ENST00000442406.5;ENST00000475721.5;ENST00000676453.1	3UTR	102	67	58	4		88	62	25	2
chr3	184335316	184335317	canonical/G3L1-7	+	chr3:184335297-184335316:+	FALSE	5'- GGGCAGGGGGAAGGGGGGGCACGGTGCCT -3' rG4seq-K -------------------*---------	EIF4G1|ENSG00000114867.22	ENST00000342981.8;ENST00000346169.7;ENST00000350481.9;ENST00000352767.7;ENST00000392537.6;ENST00000414031.5;ENST00000424196.5;ENST00000434061.6;ENST00000442406.5;ENST00000475721.5;ENST00000676453.1	3UTR	38	25	17	0		35	24	16	1
chr3	186789162	186789163	two-quartet	+	chr3:186789135-186789162:+	FALSE	5'- GGGGTCGATTTGGGAGGAAAGGTGTGGCTATAAACTT -3' rG4seq-K ---------------------------*---------	EIF4A2|ENSG00000156976.17	ENST00000323963.10;ENST00000425053.5;ENST00000426808.5;ENST00000429589.5;ENST00000440191.6;ENST00000443963.5;ENST00000485101.5;ENST00000494445.1;ENST00000496382.1	3UTR;CDS	57	36	28	2		50	33	14	0
chr4	7778012	7778013	canonical/G3L1-7	+	chr4:7777990-7778012:+	FALSE	5'- GGGAAGGGAAGAGGGTGCTGGGTCCAGGCAGG -3' rG4seq-K ----------------------*---------	AFAP1-AS1|ENSG00000272620.2	ENST00000608442.2	non_coding	60	47	14	2		53	40	7	0
chr5	138468102	138468103	potential G-quadruplex & G>=40%	+	chr5:138468043-138468103:+	FALSE	5'- CAGCAACCTTTTCTCCCAGGACAATTGAAATTTGCTAAAGGGAAAGGGGAAAGAAAGGGAAAAGGGAGAA -3' rG4seq-K -----------------------------------------------------------*----------	EGR1|ENSG00000120738.8	ENST00000239938.5	3UTR;CDS	13	11	18	2		14	9	11	0
chr5	138468109	138468110	canonical/G3L1-7	+	chr5:138468082-138468109:+	FALSE	5'- GGGAAAGGGGAAAGAAAGGGAAAAGGGAGAAAAAGAA -3' rG4seq-K ---------------------------*---------	EGR1|ENSG00000120738.8	ENST00000239938.5	3UTR	50	36	19	2		49	35	10	0
chr5	154814356	154814357	bulges	+	chr5:154814337-154814358:+	FALSE	5'- GGGGGGAGGGAAAGGGGGGAGATTTTTATAT -3' rG4seq-K -------------------*-----------	LARP1|ENSG00000155506.19	ENST00000336314.9;ENST00000518297.6;ENST00000685355.1;ENST00000685946.1;ENST00000687700.1;ENST00000688232.1;ENST00000690816.1	3UTR	26	13	6	0		30	17	7	0
chr5	177595738	177595740	bulges	+	chr5:177595711-177595740:+	FALSE	5'- GAGGCTGCTGTTGGGGGTGGGGGGAGGGGAATGGGCAGG -3' rG4seq-K ---------------------------**----------	TMED9|ENSG00000184840.12	ENST00000332598.7	3UTR	161	142	77	18		119	109	28	10
chr5	177595908	177595909	two-quartet	+	chr5:177595895-177595910:+	FALSE	5'- GGGTGGGTGGAGGGGTTTGCAGTGT -3' rG4seq-K -------------*-----------	TMED9|ENSG00000184840.12	ENST00000332598.7	3UTR	31	26	8	1		25	20	12	2
chr5	177596029	177596030	two-quartet	+	chr5:177596005-177596030:+	FALSE	5'- GGCCTTGGTGCTGGTTGGGGTGGGGCCTGCAGAGT -3' rG4seq-K ------------------------*----------	TMED9|ENSG00000184840.12	ENST00000332598.7	3UTR	42	28	13	2		47	33	7	2
chr5	178210132	178210133	bulges	+	chr5:178209408-178209432:+,chr5:178210131-178210132:+	TRUE	5'- GAGGGAACCGAGGCAGCGGAGGTGGTCAGAGTCAG -3' rG4seq-K -------------------------*---------	HNRNPAB|ENSG00000197451.12	ENST00000355836.9;ENST00000358344.8;ENST00000504898.5;ENST00000506259.5;ENST00000506339.5;ENST00000514633.5;ENST00000515193.5	CDS	65	56	14	6		47	46	9	3
chr5	178210553	178210554	bulges	+	chr5:178209408-178209432:+,chr5:178210552-178210553:+	TRUE	5'- GAGGGAACCGAGGCAGCGGAGGTGGTCAGGGTAGT -3' rG4seq-K -------------------------*---------	HNRNPAB|ENSG00000197451.12	ENST00000355836.9;ENST00000358344.8;ENST00000504898.5;ENST00000506259.5;ENST00000506339.5;ENST00000514633.5;ENST00000515193.5	CDS	41	28	32	8		48	35	17	1
chr5	179699067	179699068	longloop	+	chr5:179699041-179699068:+	FALSE	5'- GGGGCAAGGTGTGCGGGCGGGAAGGGGCACGGGCACC -3' rG4seq-K --------------------------*----------	CANX|ENSG00000127022.16	ENST00000247461.9;ENST00000452673.6;ENST00000502296.6;ENST00000502498.6;ENST00000502673.6;ENST00000504734.5;ENST00000506654.6;ENST00000513246.6;ENST00000514032.5;ENST00000679395.1;ENST00000679471.1;ENST00000679523.1;ENST00000679527.1;ENST00000679642.1;ENST00000679719.1;ENST00000680006.1;ENST00000680042.1;ENST00000680092.1;ENST00000680406.1;ENST00000680504.1;ENST00000680614.1;ENST00000680618.1;ENS…	5UTR	43	33	14	0		40	28	12	2
chr5	179699074	179699075	canonical/G3L1-7	+	chr5:179699055-179699074:+	FALSE	5'- GGGCGGGAAGGGGCACGGGCACCCCCGCG -3' rG4seq-K -------------------*---------	CANX|ENSG00000127022.16	ENST00000247461.9;ENST00000452673.6;ENST00000502296.6;ENST00000502498.6;ENST00000502673.6;ENST00000504734.5;ENST00000506654.6;ENST00000513246.6;ENST00000514032.5;ENST00000679395.1;ENST00000679471.1;ENST00000679523.1;ENST00000679527.1;ENST00000679642.1;ENST00000679719.1;ENST00000680006.1;ENST00000680042.1;ENST00000680092.1;ENST00000680406.1;ENST00000680504.1;ENST00000680614.1;ENST00000680618.1;ENS…	5UTR	129	62	32	2		117	53	18	1
chr5	179708256	179708257	bulges	+	chr5:179699091-179699102:+,chr5:179708238-179708256:+	TRUE	5'- GGAGGCTAGAGGAAAGTGGGAGGTAGAGGAAATGAAGGA -3' rG4seq-K -----------------------------*---------	CANX|ENSG00000127022.16	ENST00000247461.9;ENST00000452673.6;ENST00000502296.6;ENST00000502498.6;ENST00000502673.6;ENST00000504734.5;ENST00000506654.6;ENST00000509563.2;ENST00000513246.6;ENST00000514032.5;ENST00000679395.1;ENST00000679471.1;ENST00000679523.1;ENST00000679527.1;ENST00000679642.1;ENST00000679719.1;ENST00000680006.1;ENST00000680013.1;ENST00000680042.1;ENST00000680092.1;ENST00000680406.1;ENST00000680504.1;ENS…	3UTR;5UTR;CDS	55	37	23	3		44	34	14	1
chr5	179724769	179724770	bulges	+	chr5:179724749-179724771:+	FALSE	5'- GGAGATGAGGAGGAGGAAGGAGAAGAGAAACT -3' rG4seq-K --------------------*-----------	CANX|ENSG00000127022.16	ENST00000247461.9;ENST00000452673.6;ENST00000502296.6;ENST00000502673.6;ENST00000504734.5;ENST00000506654.6;ENST00000509563.2;ENST00000513246.6;ENST00000514032.5;ENST00000679395.1;ENST00000679471.1;ENST00000679523.1;ENST00000679527.1;ENST00000679642.1;ENST00000679719.1;ENST00000680006.1;ENST00000680013.1;ENST00000680042.1;ENST00000680092.1;ENST00000680406.1;ENST00000680504.1;ENST00000680614.1;ENS…	3UTR;CDS	56	42	18	3		38	29	12	3
chr5	179821112	179821113	potential G-quadruplex & G>=40%	+	chr5:179821053-179821113:+	FALSE	5'- GGTCCGGGACCCTGCGAGCGGCTGCTGAGCCGGGTGGCCGCCCTGTTCCCCGCGCTGCGGCCTGGCGGCT -3' rG4seq-K -----------------------------------------------------------*----------	SQSTM1|ENSG00000161011.20	ENST00000389805.9;ENST00000422245.5;ENST00000453046.5;ENST00000464493.5;ENST00000481335.5;ENST00000504627.1;ENST00000508284.5;ENST00000510187.5;ENST00000514093.5;ENST00000626660.1	CDS	55	17	108	10		49	20	68	9
chr5	179824252	179824253	bulges	+	chr5:179824229-179824252:+	FALSE	5'- GGGTGGCCAGGATGGGAAATGGGTCCACCAGGA -3' rG4seq-K -----------------------*---------	SQSTM1|ENSG00000161011.20	ENST00000360718.5;ENST00000389805.9;ENST00000422245.5;ENST00000464493.5;ENST00000466342.1;ENST00000485412.1;ENST00000508284.5;ENST00000510187.5;ENST00000514093.5	3UTR;CDS	95	19	94	2		59	17	48	2
chr5	179837961	179837962	potential G-quadruplex & G>=40%	+	chr5:179837902-179837962:+	FALSE	5'- CATGCCCTCCATGTGTAAGAACAATGCCAGGGCCCAGGAGGACCGCCTGCCCTGCCTGGGCCTTGGCTGG -3' rG4seq-K -----------------------------------------------------------*----------	SQSTM1|ENSG00000161011.20	ENST00000389805.9	3UTR	100	89	41	22		77	61	32	11
chr6	13615452	13615453	two-quartet	+	chr6:13615429-13615452:+	FALSE	5'- GGCCTCGGAGGAGGAGGAGGCGGAGCACGGGCT -3' rG4seq-K -----------------------*---------	NOL7|ENSG00000225921.7	ENST00000451315.7	CDS	10	8	12	1		16	10	9	0
chr6	31835071	31835072	two-quartet	+	chr6:31835045-31835071:+	FALSE	5'- GGCCTGGCTGGGGTAGGAGAGGGCGGTCCCCAGTGC -3' rG4seq-K --------------------------*---------	ENSG00000285565|ENSG00000285565.1;SNHG32|ENSG00000204387.14	ENST00000375635.6;ENST00000375638.7;ENST00000375640.7;ENST00000375641.6;ENST00000375642.6;ENST00000395789.5;ENST00000614363.4;ENST00000648677.1;ENST00000649802.1	non_coding	39	19	21	3		31	18	8	0
chr6	32974500	32974501	canonical/G3L1-7	+	chr6:32974474-32974500:+	FALSE	5'- GGGAATGCAGGGTTGCTGGGGCTGGGCCCAGAAGCA -3' rG4seq-K --------------------------*---------	BRD2|ENSG00000204256.14	ENST00000374825.9;ENST00000374831.8;ENST00000395287.5;ENST00000449025.5;ENST00000449085.4;ENST00000456339.5;ENST00000463639.2;ENST00000464592.6;ENST00000469132.2;ENST00000482914.5;ENST00000495733.5;ENST00000607833.5;ENST00000677085.1;ENST00000677331.1;ENST00000678250.1;ENST00000678778.1;ENST00000679099.1;ENST00000679179.1	CDS	47	29	23	1		34	18	14	0
chr6	32977937	32977938	bulges	+	chr6:32977900-32977937:+	FALSE	5'- GAGGAAGAGGAGGAGGAAGATGAGGAGGACGAGGAGGAAGAAGAGAG -3' rG4seq-K -------------------------------------*---------	BRD2|ENSG00000204256.14	ENST00000374825.9;ENST00000374831.8;ENST00000395287.5;ENST00000449025.5;ENST00000449085.4;ENST00000463639.2;ENST00000464592.6;ENST00000469132.2;ENST00000481259.1;ENST00000482914.5;ENST00000495733.5;ENST00000607833.5;ENST00000677085.1;ENST00000677331.1;ENST00000678250.1;ENST00000678778.1;ENST00000679099.1;ENST00000679179.1	3UTR;CDS	103	79	25	5		81	65	13	1
chr6	32980876	32980878	bulges	+	chr6:32980846-32980877:+	FALSE	5'- GCTGGCTCTGCAGTGGGGGAGGGATGCAGGGACATTTACTG -3' rG4seq-K ------------------------------**---------	BRD2|ENSG00000204256.14	ENST00000374825.9;ENST00000374831.8;ENST00000395287.5;ENST00000449025.5;ENST00000449085.4;ENST00000463639.2;ENST00000469132.2;ENST00000482914.5;ENST00000677085.1;ENST00000678250.1;ENST00000679099.1;ENST00000679179.1	3UTR	42	21	72	8		36	14	29	3
chr6	32980895	32980896	bulges	+	chr6:32980862-32980895:+	FALSE	5'- GGGAGGGATGCAGGGACATTTACTGAAGGAGGGACATGGACAA -3' rG4seq-K ---------------------------------*---------	BRD2|ENSG00000204256.14	ENST00000374825.9;ENST00000374831.8;ENST00000395287.5;ENST00000449025.5;ENST00000449085.4;ENST00000463639.2;ENST00000469132.2;ENST00000482914.5;ENST00000677085.1;ENST00000678250.1;ENST00000679099.1;ENST00000679179.1	3UTR	102	49	42	1		87	49	20	0
chr6	32980989	32980990	canonical/G3L1-7	+	chr6:32980970-32980989:+	FALSE	5'- GGGGCAGGGCAAGGGTGGGAGTGTGCAAA -3' rG4seq-K -------------------*---------	BRD2|ENSG00000204256.14	ENST00000374825.9;ENST00000374831.8;ENST00000395287.5;ENST00000449025.5;ENST00000449085.4;ENST00000463639.2;ENST00000469132.2;ENST00000482914.5;ENST00000677085.1;ENST00000678250.1;ENST00000679099.1;ENST00000679179.1	3UTR	173	161	35	10		150	147	22	5
chr6	32981121	32981122	bulges	+	chr6:32981100-32981121:+	FALSE	5'- GGGGGGAGGGTGGGGCCGTGGTCCCCTCAGC -3' rG4seq-K ---------------------*---------	BRD2|ENSG00000204256.14	ENST00000374825.9;ENST00000374831.8;ENST00000395287.5;ENST00000449025.5;ENST00000449085.4;ENST00000463639.2;ENST00000469132.2;ENST00000482914.5;ENST00000678250.1	3UTR	124	24	102	3		107	21	70	3
chr6	32981153	32981156	two-quartet	+	chr6:32981137-32981155:+	FALSE	5'- GGGGAGGGAAGAAGGGGGAGCTCTTTTT -3' rG4seq-K ----------------***---------	BRD2|ENSG00000204256.14	ENST00000374825.9;ENST00000374831.8;ENST00000395287.5;ENST00000449025.5;ENST00000449085.4;ENST00000463639.2;ENST00000469132.2;ENST00000482914.5;ENST00000678250.1	3UTR	193	48	109	9		131	32	81	2
chr6	33203774	33203777	two-quartet	+	chr6:33203752-33203776:+	FALSE	5'- GGAGGTGCTGGGGCTGCTGGGGGGAGTTATCATG -3' rG4seq-K ----------------------***---------	SLC39A7|ENSG00000112473.18	ENST00000374675.7;ENST00000374677.8;ENST00000463972.1	CDS	37	18	28	5		41	21	18	0
chr6	33204315	33204316	canonical/G3L1-7	+	chr6:33204289-33204315:+	FALSE	5'- GGGAGTGATTGGGGGGATGGGGTGGGAGAGGGTTAG -3' rG4seq-K --------------------------*---------	SLC39A7|ENSG00000112473.18	ENST00000374675.7;ENST00000374677.8;ENST00000463972.1	3UTR	26	25	8	2		18	18	10	2
chr6	33211908	33211909	bulges	+	chr6:33211874-33211910:+	FALSE	5'- GGTGTGGCGGGGAGGGTGGGGGTGCCGGAGGAGGTGACGGTCCTGA -3' rG4seq-K ----------------------------------*-----------	RING1|ENSG00000204227.5	ENST00000374656.5;ENST00000478431.1	CDS	17	10	10	1		18	14	7	1
chr6	36594425	36594426	two-quartet	+	chr6:36594397-36594425:+	FALSE	5'- GGTTGGTGTTGGGCCGGAGGAAAGCGGGAAGACTCATC -3' rG4seq-K ----------------------------*---------	SRSF3|ENSG00000112081.17	ENST00000339436.11;ENST00000373715.11;ENST00000477442.6;ENST00000613941.4;ENST00000620242.1	5UTR	46	28	12	3		29	15	11	0
chr6	36687046	36687047	longloop	+	chr6:36687014-36687046:+	FALSE	5'- GGGCATGCCACGTGGGCTCATATGGGGCTGGGAGTAGTTGTC -3' rG4seq-K --------------------------------*---------	CDKN1A|ENSG00000124762.14	ENST00000244741.10;ENST00000405375.5;ENST00000448526.6;ENST00000615513.4	3UTR	35	15	18	0		28	15	11	1
chr6	37174390	37174391	canonical/G3L1-7	+	chr6:37174368-37174390:+	FALSE	5'- GGGGGTGGGGGGTGGGGGTGGGTCAGAACCCT -3' rG4seq-K ----------------------*---------	PIM1|ENSG00000137193.14	ENST00000373509.6	3UTR	19	13	9	1		30	26	6	2
chr6	43179312	43179313	bulges	+	chr6:43179278-43179312:+	FALSE	5'- GGGCCGCAGGAGGGAGGCGGGGAGGAGGAACGGGCAGCCACAGG -3' rG4seq-K ----------------------------------*---------	SRF|ENSG00000112658.8	ENST00000265354.6	3UTR	26	15	12	1		26	19	6	0
chr6	63580943	63580944	longloop	+	chr6:63580915-63580945:+	FALSE	5'- GGGAGGGCCTGAGAAAAGAATGGGAGGGGGCTATTAATTA -3' rG4seq-K ----------------------------*-----------	ENSG00000285976|ENSG00000285976.2;PTP4A1|ENSG00000112245.13	ENST00000370651.7;ENST00000626021.3;ENST00000648894.1;ENST00000672924.1;ENST00000673199.1;ENST00000673217.1	3UTR	67	62	16	2		63	56	6	2
chr7	1530754	1530755	longloop	+	chr7:1530711-1530755:+	FALSE	5'- GGGGAGCCGGGCGGGCGGGTGCGGTGGCGGCGGGCGGCGCGGGGGCACTTGTTG -3' rG4seq-K -------------------------------------------*----------	MAFK|ENSG00000198517.10	ENST00000343242.9	5UTR	25	14	19	0		19	7	12	0
chr7	1541085	1541086	longloop	+	chr7:1541043-1541085:+	FALSE	5'- GGGCTGAGGGGGTGCAGCTTGCTGGTGTTCACTGGGGGAGGGCCTGTGGGCA -3' rG4seq-K ------------------------------------------*---------	MAFK|ENSG00000198517.10	ENST00000343242.9;ENST00000403150.5	3UTR	12	7	9	0		13	10	9	1
chr7	1541480	1541482	bulges	+	chr7:1541446-1541483:+	FALSE	5'- GGAGGACGTTGCGTGGAGTGGTGGGAGGAGGCGGGAGCCGTGTGCGA -3' rG4seq-K ----------------------------------**-----------	MAFK|ENSG00000198517.10	ENST00000343242.9;ENST00000403150.5	3UTR	61	42	19	1		43	36	14	1
chr7	1541591	1541592	bulges	+	chr7:1541575-1541591:+	FALSE	5'- GGGCGCGGCGGGTGGGGAGGCAGCAG -3' rG4seq-K ----------------*---------	MAFK|ENSG00000198517.10	ENST00000343242.9;ENST00000403150.5	3UTR	49	49	13	5		56	53	13	1
chr7	44212717	44212718	longloop	+	chr7:44212679-44212717:+	FALSE	5'- GGGGGGTGGGGAGTCCCTGATGCTAGGGCTGGGGTGGGTGGAGTTTGA -3' rG4seq-K --------------------------------------*---------	YKT6|ENSG00000106636.9	ENST00000223369.3;ENST00000421621.3;ENST00000478411.2;ENST00000496112.5;ENST00000677436.1;ENST00000677851.1;ENST00000678359.1;ENST00000678497.1;ENST00000679020.1;ENST00000679209.1;ENST00000679310.1	3UTR	37	25	10	2		41	27	9	1
chr7	73831952	73831953	longloop	+	chr7:73831920-73831952:+	FALSE	5'- GGGCCACTGGCTGCTGGGGACTGGGGACTGGGCAGAGACTGA -3' rG4seq-K --------------------------------*---------	CLDN4|ENSG00000189143.10	ENST00000340958.4;ENST00000431918.1;ENST00000435050.1	3UTR	54	19	42	1		45	16	25	1
chr7	73832105	73832107	bulges	+	chr7:73832087-73832109:+	FALSE	5'- GGTGTGGTGGTGGAGTGGGGAGCTGGCTTCTG -3' rG4seq-K ------------------**------------	CLDN4|ENSG00000189143.10	ENST00000340958.4;ENST00000431918.1;ENST00000435050.1	3UTR	182	127	53	8		150	115	35	6
chr7	73832356	73832358	bulges	+	chr7:73832330-73832358:+	FALSE	5'- GTGGATGGACGGGTTTAGAGGGGAGGGGCGAAGGTGCT -3' rG4seq-K --------------------------**----------	CLDN4|ENSG00000189143.10	ENST00000340958.4;ENST00000431918.1;ENST00000435050.1	3UTR	126	104	70	8		129	86	31	7
chr7	73832398	73832401	bulges	+	chr7:73832380-73832401:+	FALSE	5'- GGGCAGTGGTGGGGGAGGGGGCCAGAGAGGC -3' rG4seq-K ------------------***----------	CLDN4|ENSG00000189143.10	ENST00000340958.4;ENST00000431918.1;ENST00000435050.1	3UTR	353	169	184	28		302	155	105	23
chr7	73832552	73832553	canonical/G3L1-7	+	chr7:73832530-73832553:+	FALSE	5'- GGGAGGGTGGCAGGGAGGAGGGGACAGCTTCAC -3' rG4seq-K ----------------------*----------	CLDN4|ENSG00000189143.10	ENST00000340958.4;ENST00000431918.1;ENST00000435050.1	3UTR	265	176	113	18		195	141	62	11
chr7	74196196	74196198	two-quartet	+	chr7:74196171-74196196:+	FALSE	5'- GGCGCTTTGGGGGTGGAGGGGGTGGTGCTGGTGCT -3' rG4seq-K -------------------------**--------	EIF4H|ENSG00000106682.16	ENST00000265753.13;ENST00000353999.6;ENST00000495187.2;ENST00000677570.1;ENST00000677681.1;ENST00000677998.1;ENST00000678438.1;ENST00000678815.1;ENST00000679161.1;ENST00000679266.1;ENST00000679287.1	3UTR	143	59	32	2		74	41	20	2
chr7	100430500	100430501	two-quartet	+	chr7:100430483-100430500:+	FALSE	5'- GGGGGAGGCGGGGGAGGCTTCAAACAT -3' rG4seq-K -----------------*---------	MEPCE|ENSG00000146834.14	ENST00000310512.4;ENST00000414441.5;ENST00000479201.1;ENST00000497759.1	CDS	27	19	11	1		13	8	6	0
chr7	112472225	112472226	two-quartet	+	chr7:112468104-112468115:+,chr7:112472218-112472225:+	TRUE	5'- GGGCAGTGGAGGAACGGGATTTTCCAAC -3' rG4seq-K ------------------*---------	ENSG00000288640|ENSG00000288640.1;IFRD1|ENSG00000006652.15	ENST00000005558.8;ENST00000403825.8;ENST00000421296.1;ENST00000462155.2;ENST00000470441.1;ENST00000489994.5;ENST00000535603.5;ENST00000621379.4;ENST00000674887.1;ENST00000674915.1;ENST00000675041.1;ENST00000675578.1;ENST00000675717.1;ENST00000675905.1;ENST00000676282.1	3UTR;CDS	25	12	17	1		20	13	7	0
chr7	128862916	128862918	bulges	+	chr7:128862890-128862918:+	FALSE	5'- GCCCGGCTGCAGGGATGGCGGGGAGGGGTAAGCTCATC -3' rG4seq-K --------------------------**----------	ATP6V1F|ENSG00000128524.5	ENST00000249289.5;ENST00000492758.1	5UTR;CDS	29	25	17	1		43	28	16	0
chr8	119208438	119208439	bulges	+	chr8:119208406-119208440:+	FALSE	5'- GGAGCCCGGGAGGCGGAGGCGGGAGGCGGCGGCGGCGCGCGGAG -3' rG4seq-K --------------------------------*-----------	MAL2|ENSG00000147676.14	ENST00000522112.6;ENST00000534619.5;ENST00000614891.5	5UTR	47	22	15	0		44	25	23	1
chr9	36211985	36211987	bulges	+	chr9:36211959-36211986:+	FALSE	5'- GGGAGAGGAGGAAGAGGAAGGGGAGGGAAGCTTCCCA -3' rG4seq-K --------------------------**---------	CLTA|ENSG00000122705.17	ENST00000242285.10;ENST00000345519.10;ENST00000396603.6;ENST00000433436.6;ENST00000464497.5;ENST00000470744.5;ENST00000493185.2;ENST00000538225.5;ENST00000540080.5	3UTR	103	50	44	2		101	55	12	1
chr9	107324931	107324932	bulges	+	chr9:107324893-107324931:+	FALSE	5'- GGTGGTCAAGGAGGAGGAGGTGGAGGTGGCAGTGGAGGAATTGCAGAA -3' rG4seq-K --------------------------------------*---------	RAD23B|ENSG00000119318.13	ENST00000358015.8;ENST00000416373.6;ENST00000457811.1	CDS	60	43	20	2		44	34	11	1
chr9	107330237	107330238	canonical/G3L1-7	+	chr9:107330216-107330237:+	FALSE	5'- GGGGTGGGAGGGGAGAAAGGGAACCTTTTCT -3' rG4seq-K ---------------------*---------	RAD23B|ENSG00000119318.13	ENST00000358015.8;ENST00000416373.6;ENST00000457811.1	3UTR	111	101	28	7		105	97	16	3
chr9	130501226	130501228	longloop	+	chr9:130501199-130501228:+	FALSE	5'- GGGAAGGGTGGGGGGCAGCTGCGGTGGGGAGCTATAAAA -3' rG4seq-K ---------------------------**----------	ASS1|ENSG00000130707.18	ENST00000352480.10;ENST00000372393.7;ENST00000372394.5	3UTR	112	87	15	1		75	62	6	1
chr9	137242656	137242657	canonical/G3L1-7	+	chr9:137242634-137242656:+	FALSE	5'- GGGTGGGGGGACTGGGTCTGGGATGGGTACCC -3' rG4seq-K ----------------------*---------	TUBB4B|ENSG00000188229.6	ENST00000340384.5;ENST00000604929.1	CDS	56	41	41	4		59	47	15	2
chr9	137243548	137243549	bulges	+	chr9:137243513-137243551:+	FALSE	5'- GGAGGGCGAGTTCGAGGAGGAGGCTGAGGAGGAGGTGGCCTAGAGCCT -3' rG4seq-K -----------------------------------*------------	TUBB4B|ENSG00000188229.6	ENST00000340384.5;ENST00000604929.1	CDS	84	40	37	0		63	22	22	0
chr9	137243551	137243552	bulges	+	chr9:137243513-137243551:+	FALSE	5'- GGAGGGCGAGTTCGAGGAGGAGGCTGAGGAGGAGGTGGCCTAGAGCCT -3' rG4seq-K --------------------------------------*---------	TUBB4B|ENSG00000188229.6	ENST00000340384.5;ENST00000604929.1	CDS	229	141	49	7		187	124	24	2
NC_006213.1	27783	27784	potential G-quadruplex & G>=40%	+	NC_006213.1:27724-27784:+	FALSE	5'- CTATTCTTCATATGCTGTTGTACAGGATGTGGGACTAGTTGTTTTAAGAAATGTGGTGGTTGTTGTGATG -3' rG4seq-K -----------------------------------------------------------*----------	NA	NA	NA	854	241	493	59		599	160	299	41
NC_006213.1	29512	29513	potential G-quadruplex & G>=40%	+	NC_006213.1:29453-29513:+	FALSE	5'- AGTTTGTAGAAGGACAAGGTGTGCCTATTGCACCAGGAGTCCCAGCTACTGAAGCTAAGGGGTACTGGTA -3' rG4seq-K -----------------------------------------------------------*----------	NA	NA	NA	5505	694	8134	631		4363	573	4316	306
NC_006213.1	29633	29634	potential G-quadruplex & G>=40%	+	NC_006213.1:29574-29634:+	FALSE	5'- GCTGCCACGATGGTATTTTTACTATCTGGGAACAGGACCGCATGCTAAAGACCAGTACGGCACCGATATT -3' rG4seq-K -----------------------------------------------------------*----------	NA	NA	NA	7134	806	12154	803		5693	662	6151	460
NC_006213.1	29728	29729	potential G-quadruplex & G>=40%	+	NC_006213.1:29669-29729:+	FALSE	5'- ACCAGGCTGATGTCAATACCCCGGCTGACATTGTCGATCGGGACCCAAGTAGCGATGAGGCTATTCCGAC -3' rG4seq-K -----------------------------------------------------------*----------	NA	NA	NA	5873	537	8711	449		4528	465	4733	258
chr1	999810	999811	canonical/G3L1-7	-	chr1:999811-999841:-	FALSE	5'- GGGGCGACCGGGGGGCGGGAGGGACGCGGGACTCAGCCGG -3' rG4seq-K ------------------------------*---------	HES4|ENSG00000188290.11	ENST00000304952.11;ENST00000428771.6;ENST00000481869.1;ENST00000484667.2	CDS	32	15	12	1		34	16	13	0
chr1	1785743	1785744	canonical/G3L1-7	-	chr1:1785744-1785770:-	FALSE	5'- GGGTGGGGAGGGAGAGAGAGGGAGGGAGAGGGAGTG -3' rG4seq-K --------------------------*---------	GNB1|ENSG00000078369.18	ENST00000378609.9;ENST00000610897.4;ENST00000615252.4	3UTR	48	22	13	1		39	25	7	1
chr1	8012959	8012961	bulges	-	chr1:8012960-8012984:-	FALSE	5'- GATGGTGGGGAGGGGAGGATGGGGAAGCTTTTTA -3' rG4seq-K -----------------------**---------	ERRFI1|ENSG00000116285.13	ENST00000377482.10;ENST00000474874.5	3UTR	766	454	124	22		432	269	67	8
chr1	16124568	16124569	longloop	-	chr1:16124569-16124599:-	FALSE	5'- GGGGGCCCCGCCAGGGCTGGGGACAGAGGGTGTCAAACAT -3' rG4seq-K ------------------------------*---------	EPHA2|ENSG00000142627.13	ENST00000358432.8	3UTR	49	30	20	0		30	18	16	0
chr1	16155957	16155960	canonical/G3L1-7	-	chr1:16155958-16155985:-	FALSE	5'- GGGTGTGCGGGAGCCGGGCTCGGGGGGATCGGACCGA -3' rG4seq-K -------------------------*-*---------	EPHA2|ENSG00000142627.13	ENST00000358432.8;ENST00000461614.1	5UTR	72	25	52	2		84	23	39	1
chr1	20652220	20652221	potential G-quadruplex & G>=40%	-	chr1:20652220-20652280:-	FALSE	5'- TGGCACAACTTTACCTCTGTGGGAGATGCAACACTGAGAGCCAAGGGGTGGGAGTTGGGATAATTTTTAT -3' rG4seq-K -----------------------------------------------------------*----------	DDOST|ENSG00000244038.11	ENST00000415136.6;ENST00000602624.7	3UTR	61	45	12	2		71	44	8	2
chr1	20652328	20652329	two-quartet	-	chr1:20652329-20652351:-	FALSE	5'- GGAGACGGGGCAAGGAGGGGGGTTATTAGGAT -3' rG4seq-K ----------------------*---------	DDOST|ENSG00000244038.11	ENST00000415136.6;ENST00000602624.7	3UTR	65	47	15	2		49	37	14	1
chr1	32334005	32334006	two-quartet	-	chr1:32334006-32334026:-	FALSE	5'- GGCTTTGGGGTGGGGGGAGGTCTGTAATGT -3' rG4seq-K --------------------*---------	MARCKSL1|ENSG00000175130.7	ENST00000329421.8	3UTR	48	37	13	4		35	27	9	1
chr1	36341625	36341626	canonical/G3L1-7	-	chr1:36341626-36341646:-	FALSE	5'- GGGACAGGGCAGGGACAGGGACAGCCCAGG -3' rG4seq-K --------------------*---------	STK40|ENSG00000196182.11	ENST00000359297.6;ENST00000373129.7;ENST00000373130.7;ENST00000373132.4	3UTR	48	43	7	1		36	26	6	0
chr1	42926429	42926430	bulges	-	chr1:42926430-42926448:-	FALSE	5'- GGGAGGAGAGGGGAAGGGCCAGTCTGGG -3' rG4seq-K ------------------*---------	SLC2A1|ENSG00000117394.24	ENST00000426263.10;ENST00000630287.2;ENST00000674545.1;ENST00000674765.1;ENST00000675112.1;ENST00000676254.1	3UTR	28	23	8	1		31	26	8	0
chr1	58781621	58781622	bulges	-	chr1:58781622-58781653:-	FALSE	5'- GGAGGGTTGGGGAGGGGCGGCAGGAGGGAGGTTTGTGAGAG -3' rG4seq-K -------------------------------*---------	JUN|ENSG00000177606.8	ENST00000371222.4;ENST00000678696.1	3UTR	58	19	17	0		60	16	13	0
chr1	58781717	58781718	bulges	-	chr1:58781716-58781734:-	FALSE	5'- GGGGGGAGGGGGAGGGGGTTACAAACTG -3' rG4seq-K ----------------*-----------	JUN|ENSG00000177606.8	ENST00000371222.4;ENST00000678696.1	3UTR	61	53	18	5		37	36	14	4
chr1	114717068	114717069	longloop	-	chr1:114717069-114717097:-	FALSE	5'- GGGTCAGCTCAGGGGATGTGGGGGAGGGCGGTTTTATC -3' rG4seq-K ----------------------------*---------	CSDE1|ENSG00000009307.17	ENST00000339438.10;ENST00000358528.9;ENST00000438362.7;ENST00000483030.2;ENST00000529046.6;ENST00000610726.5;ENST00000684913.1;ENST00000685676.1;ENST00000686025.1;ENST00000686123.1;ENST00000686235.1;ENST00000686581.1;ENST00000686667.1;ENST00000686781.1;ENST00000687548.1;ENST00000687759.1;ENST00000688211.1;ENST00000688611.1;ENST00000689217.1;ENST00000689510.1;ENST00000689573.1;ENST00000689631.1;EN…	3UTR	37	34	11	2		33	29	16	2
chr1	150574887	150574888	bulges	-	chr1:150574888-150574921:-	FALSE	5'- GGGGAGTGGTGGGTTTATAGGGGGAGGAGGAGGCAGGTGGTCT -3' rG4seq-K ---------------------------------*---------	MCL1|ENSG00000143384.14	ENST00000369026.3;ENST00000464132.2;ENST00000620947.4;ENST00000676522.1;ENST00000678610.1;ENST00000678770.1	3UTR	139	59	51	6		123	52	25	4
chr1	150574896	150574899	longloop	-	chr1:150574898-150574933:-	FALSE	5'- GGGAAAGGAGGAGGGGAGTGGTGGGTTTATAGGGGGAGGAGGAGG -3' rG4seq-K ----------------------------------***--------	MCL1|ENSG00000143384.14	ENST00000369026.3;ENST00000464132.2;ENST00000620947.4;ENST00000676522.1;ENST00000678610.1;ENST00000678770.1	3UTR	85	19	129	7		66	18	33	2
chr1	150574907	150574908	bulges	-	chr1:150574908-150574933:-	FALSE	5'- GGGAAAGGAGGAGGGGAGTGGTGGGTTTATAGGGG -3' rG4seq-K -------------------------*---------	MCL1|ENSG00000143384.14	ENST00000369026.3;ENST00000464132.2;ENST00000620947.4;ENST00000676522.1;ENST00000678610.1;ENST00000678770.1	3UTR	11	7	27	3		6	5	15	0
chr1	150574954	150574955	potential G-quadruplex & G>=40%	-	chr1:150574954-150575014:-	FALSE	5'- TGACTGTGGAAATACAGACAAGGATCTTAGTTGATATTTTGGGCTTGGGGCAGTGAGGGCTTAGGACACC -3' rG4seq-K -----------------------------------------------------------*----------	MCL1|ENSG00000143384.14	ENST00000369026.3;ENST00000464132.2;ENST00000620947.4;ENST00000676522.1;ENST00000678610.1;ENST00000678770.1	3UTR	64	22	37	4		48	25	33	5
chr1	150577477	150577478	two-quartet	-	chr1:150578243-150578249:-,chr1:150577478-150577491:-	TRUE	5'- GGCTGGGATGGGTTTGTGGAGTTCTTCCA -3' rG4seq-K -------------------*---------	MCL1|ENSG00000143384.14	ENST00000307940.3;ENST00000369026.3;ENST00000464132.2;ENST00000620947.4;ENST00000676522.1;ENST00000678610.1;ENST00000678770.1	CDS	116	78	27	0		90	60	16	3
chr1	150579430	150579432	potential G-quadruplex & G>=40%	-	chr1:150579430-150579490:-	FALSE	5'- TCTACTGTGGGGGGGCCGGCTTGGGGGCCGGCAGCGGCGGCGCCACCCGCCCGGGAGGGCGACTTTTGGC -3' rG4seq-K ----------------------------------------------------------**----------	MCL1|ENSG00000143384.14	ENST00000307940.3;ENST00000369026.3;ENST00000464132.2;ENST00000620947.4;ENST00000676522.1;ENST00000678610.1;ENST00000678770.1	CDS	138	60	208	3		123	46	131	3
chr1	153614368	153614371	canonical/G3L1-7	-	chr1:153614369-153614396:-	FALSE	5'- GGGGAGGAGGGAGAGCAGGGTTGGGGGAGAGGCTGAG -3' rG4seq-K -------------------------***---------	S100A14|ENSG00000189334.9	ENST00000344616.4;ENST00000368701.5;ENST00000368702.5;ENST00000476873.5	3UTR	189	59	122	6		187	62	75	8
chr1	153614574	153614575	bulges	-	chr1:153614575-153614605:-	FALSE	5'- GGGGAGAACAGAGAGGAGCTGGGCTATGGGAAATGATTTG -3' rG4seq-K ------------------------------*---------	S100A14|ENSG00000189334.9	ENST00000344616.4;ENST00000368701.5;ENST00000368702.5;ENST00000476873.5	3UTR	44	24	29	2		45	30	12	0
chr1	153614655	153614656	longloop	-	chr1:153614656-153614686:-	FALSE	5'- GGGAGGCTCAGGGGACTGGTTGGGCCAGGGATGAATATTT -3' rG4seq-K ------------------------------*---------	S100A14|ENSG00000189334.9	ENST00000344616.4;ENST00000368701.5;ENST00000368702.5;ENST00000476873.5	3UTR	94	43	28	2		70	40	17	0
chr1	153615295	153615296	two-quartet	-	chr1:153615296-153615310:-	FALSE	5'- GGAGGGTGGGAAGGAGACGCTGAC -3' rG4seq-K --------------*---------	S100A14|ENSG00000189334.9	ENST00000344616.4;ENST00000368700.7;ENST00000368701.5;ENST00000368702.5;ENST00000469571.1;ENST00000476873.5	CDS	85	62	32	3		81	72	18	1
chr1	153959184	153959185	longloop	-	chr1:153959185-153959209:-	FALSE	5'- GGGGAGGGAGGGCTGTGCATAGGGACATATTCTT -3' rG4seq-K ------------------------*---------	ENSG00000285779|ENSG00000285779.1;SLC39A1|ENSG00000143570.19	ENST00000310483.10;ENST00000356205.9;ENST00000368621.5;ENST00000368623.7;ENST00000537590.5;ENST00000617697.4;ENST00000621013.4;ENST00000648921.1	3UTR	35	32	6	3		29	26	6	1
chr1	154206970	154206971	two-quartet	-	chr1:154206970-154206995:-	FALSE	5'- GGAACTGGTGGGAGGTCAAGTGGGGAAGTTGGTGA -3' rG4seq-K ------------------------*----------	C1orf43|ENSG00000143612.21	ENST00000350592.7;ENST00000362076.8;ENST00000368521.10;ENST00000470180.2;ENST00000648267.1	3UTR	23	10	10	0		13	8	7	0
chr1	182383917	182383918	bulges	-	chr1:182383918-182383947:-	FALSE	5'- GGGAATTAGGAGAGAAGGTAGGGGTTGGGAATCAGAGAG -3' rG4seq-K -----------------------------*---------	GLUL|ENSG00000135821.19	ENST00000311223.9;ENST00000331872.11;ENST00000339526.8;ENST00000417584.6;ENST00000491322.1;ENST00000642379.1	3UTR	27	22	8	0		23	21	6	0
chr1	182384147	182384148	bulges	-	chr1:182384145-182384165:-	FALSE	5'- GTGGGGAGGAGGGTGGGGAGACATAACCAC -3' rG4seq-K -----------------*------------	GLUL|ENSG00000135821.19	ENST00000311223.9;ENST00000331872.11;ENST00000339526.8;ENST00000417584.6;ENST00000491322.1;ENST00000642379.1	3UTR	41	38	15	3		37	35	12	3
chr1	244862726	244862729	longloop	-	chr1:244863673-244863703:-,chr1:244862727-244862730:-	TRUE	5'- GGGCGAGGCAGGGCCAGCAGCAGGCGGGAGGGGACGGCAAAAC -3' rG4seq-K -------------------------------***---------	HNRNPU|ENSG00000153187.20	ENST00000283179.14;ENST00000366525.8;ENST00000440865.2;ENST00000444376.7;ENST00000476241.2;ENST00000638475.1;ENST00000638952.1;ENST00000640056.1;ENST00000640218.2;ENST00000640306.1;ENST00000640440.1;ENST00000649899.1	CDS	163	41	116	3		138	33	80	4
chr1	244864026	244864027	bulges	-	chr1:244864027-244864067:-	FALSE	5'- GGCGGCGATGAAGAGGAGGAGGAAGAGGAAGAGGAGGAGGAAGGAATCTC -3' rG4seq-K ----------------------------------------*---------	HNRNPU|ENSG00000153187.20	ENST00000283179.14;ENST00000444376.7;ENST00000476241.2;ENST00000638475.1;ENST00000638952.1;ENST00000640218.2;ENST00000640306.1;ENST00000649899.1	CDS	29	27	20	4		32	28	10	3
chr10	3778989	3778991	two-quartet	-	chr10:3778990-3779016:-	FALSE	5'- GGAAAATCTTGGAGGGTGGGCGTGGGAACTCAGGAC -3' rG4seq-K -------------------------**---------	KLF6|ENSG00000067082.15	ENST00000461124.1;ENST00000497571.6;ENST00000542957.1	3UTR	133	81	56	12		128	83	27	5
chr10	3785137	3785138	canonical/G3L1-7	-	chr10:3785138-3785162:-	FALSE	5'- GGGCTGCGGGAGGGTCCGGCCGGGCGTCTCTGCG -3' rG4seq-K ------------------------*---------	KLF6|ENSG00000067082.15	ENST00000380946.3;ENST00000469435.1;ENST00000497571.6;ENST00000542957.1	5UTR	82	49	43	2		65	37	32	0
chr10	43387714	43387715	two-quartet	-	chr10:43387715-43387735:-	FALSE	5'- GGGCAGGCAGAGTGGTGAGGCTTTTGTTGA -3' rG4seq-K --------------------*---------	HNRNPF|ENSG00000169813.17	ENST00000337970.7;ENST00000356053.7;ENST00000357065.8;ENST00000443950.6;ENST00000477108.5;ENST00000498176.1;ENST00000544000.5;ENST00000682386.1	CDS	33	22	8	1		17	15	10	1
chr10	71816754	71816755	canonical/G3L1-7	-	chr10:71816755-71816778:-	FALSE	5'- GGGGTTCTGTGGGTTTGGGTGGGAAGAGGGCCA -3' rG4seq-K -----------------------*---------	PSAP|ENSG00000197746.15	ENST00000394936.8	3UTR	46	46	12	7		32	32	9	3
chr10	119042363	119042364	two-quartet	-	chr10:119042364-119042394:-	FALSE	5'- GGATGATGACCGGGGGCCGAGGCGAGGAGGCGCTGATGAT -3' rG4seq-K ------------------------------*---------	EIF3A|ENSG00000107581.13	ENST00000369144.8;ENST00000541549.2	CDS	37	11	15	0		27	12	12	0
chr11	6476647	6476648	canonical/G3L1-7	-	chr11:6476647-6476672:-	FALSE	5'- GGGGACTGGGACCAAAGGGGTGGGGATAATGGGGA -3' rG4seq-K ------------------------*----------	ARFIP2|ENSG00000132254.13	ENST00000254584.6;ENST00000396777.8;ENST00000531037.5;ENST00000614314.4	3UTR	26	23	15	2		21	19	9	2
chr11	6477048	6477050	longloop	-	chr11:6477049-6477074:-	FALSE	5'- GGGAAGGGCAGCCCCAGGGTGTGGGAGATTGGACA -3' rG4seq-K ------------------------**---------	ARFIP2|ENSG00000132254.13	ENST00000254584.6;ENST00000396777.8;ENST00000423813.6;ENST00000445086.6;ENST00000531037.5;ENST00000614314.4	3UTR	62	55	21	1		65	35	23	1
chr11	10806854	10806855	two-quartet	-	chr11:10806855-10806876:-	FALSE	5'- GGGCGGAGGAGGAAGTAGGGGTGCACCTCAG -3' rG4seq-K ---------------------*---------	EIF4G2|ENSG00000110321.19	ENST00000339995.11;ENST00000396525.7;ENST00000524932.6;ENST00000525681.6;ENST00000525972.5;ENST00000525995.1;ENST00000526148.6;ENST00000527419.6;ENST00000527526.6;ENST00000528562.6;ENST00000530211.6;ENST00000530702.2;ENST00000531416.6;ENST00000531507.5;ENST00000531647.6;ENST00000532082.6;ENST00000532383.5;ENST00000532570.6;ENST00000533485.1	CDS	54	14	42	2		59	24	20	2
chr11	57326177	57326178	canonical/G3L1-7	-	chr11:57326178-57326203:-	FALSE	5'- GGGAGAGATAGGGTGGGAGGCAGGGCAATGCAGGA -3' rG4seq-K -------------------------*---------	SSRP1|ENSG00000149136.9	ENST00000278412.7;ENST00000293880.9	3UTR	60	47	13	1		42	37	7	0
chr11	62536508	62536510	bulges	-	chr11:62536509-62536534:-	FALSE	5'- GGGGAAGAGAGGAAGGAGGGGCGGGCTCCTGGCAA -3' rG4seq-K ------------------------**---------	AHNAK|ENSG00000124942.14	ENST00000257247.11;ENST00000378024.9;ENST00000528508.5;ENST00000530285.5;ENST00000531324.1;ENST00000533365.5	5UTR	62	45	19	2		49	26	12	0
chr11	85958017	85958019	bulges	-	chr11:85958018-85958048:-	FALSE	5'- GAAGGTGTTACAAGGGGGAGGGAAGGGGGGCAAAGTCCTT -3' rG4seq-K -----------------------------**---------	PICALM|ENSG00000073921.18	ENST00000393346.8;ENST00000526033.5;ENST00000532317.5	3UTR	60	38	20	4		64	48	15	4
chr11	118748166	118748167	canonical/G3L1-7	-	chr11:118748167-118748192:-	FALSE	5'- GGGTAAGGGAGGGGGTAGGGCTGGGTTATTAAGAT -3' rG4seq-K -------------------------*---------	DDX6|ENSG00000110367.14	ENST00000534980.7;ENST00000620157.4	3UTR	50	40	11	3		35	27	6	1
chr11	119044872	119044873	potential G-quadruplex & G>=40%	-	chr11:119044872-119044932:-	FALSE	5'- TCTCACTCGTATTTCCCACCCCTAGTGGCCAGAGGAGGGAGGGGCACAGTGAAGAAGGGAGCCCACCACC -3' rG4seq-K -----------------------------------------------------------*----------	HYOU1|ENSG00000149428.20	ENST00000612687.4;ENST00000614711.4;ENST00000617285.5;ENST00000652093.1	3UTR	94	52	31	0		80	52	14	1
chr11	119044888	119044889	two-quartet	-	chr11:119044888-119044906:-	FALSE	5'- GGCCAGAGGAGGGAGGGGCACAGTGAAG -3' rG4seq-K -----------------*----------	HYOU1|ENSG00000149428.20	ENST00000612687.4;ENST00000614711.4;ENST00000617285.5;ENST00000652093.1	3UTR	35	20	22	0		17	10	12	0
chr11	119045436	119045437	bulges	-	chr11:119045437-119045463:-	FALSE	5'- GAGGTGTGGAGAAGGGGAAGGGAGGGACAGCTCACT -3' rG4seq-K --------------------------*---------	HYOU1|ENSG00000149428.20	ENST00000532519.6;ENST00000612687.4;ENST00000614711.4;ENST00000617285.5;ENST00000621959.4;ENST00000652093.1	3UTR	97	88	24	1		82	77	12	0
chr11	119051588	119051589	two-quartet	-	chr11:119051589-119051623:-	FALSE	5'- GGAGTTCACGAGGGAGGTGGAGGAGGAGCCTGGGATTCACAGCC -3' rG4seq-K ----------------------------------*---------	HYOU1|ENSG00000149428.20	ENST00000530473.5;ENST00000532519.6;ENST00000543287.5;ENST00000612687.4;ENST00000614711.4;ENST00000617285.5;ENST00000621959.4;ENST00000652093.1	3UTR;CDS	71	25	29	2		63	27	14	0
chr11	119051596	119051597	bulges	-	chr11:119051818-119051819:-,chr11:119051598-119051625:-	TRUE	5'- GGTGGAGTTCACGAGGGAGGTGGAGGAGGAGCCTGGGA -3' rG4seq-K -----------------------------*--------	HYOU1|ENSG00000149428.20	ENST00000530473.5;ENST00000532519.6;ENST00000543287.5;ENST00000612687.4;ENST00000614711.4;ENST00000617285.5;ENST00000621959.4;ENST00000652093.1	3UTR;CDS	30	16	21	3		27	12	14	0
chr11	119051938	119051939	potential G-quadruplex & G>=40%	-	chr11:119051938-119051998:-	FALSE	5'- GTTGCATGCTCCAGGGTAGACCGTGCTGAGGCTTGGGGCTTTCCCAGGGAGGAGCTGGGGAAGAACATCA -3' rG4seq-K -----------------------------------------------------------*----------	HYOU1|ENSG00000149428.20	ENST00000530473.5;ENST00000532519.6;ENST00000543287.5;ENST00000612687.4;ENST00000614711.4;ENST00000617285.5;ENST00000621959.4;ENST00000652093.1	3UTR;CDS	33	19	14	0		32	18	10	0
chr11	119057072	119057073	bulges	-	chr11:119057073-119057107:-	FALSE	5'- GGGCGCGGGTGGGGGGCGCTGCCGGCCTCGTGGGTACGTTCGTG -3' rG4seq-K ----------------------------------*---------	HYOU1|ENSG00000149428.20	ENST00000526354.1;ENST00000527038.6;ENST00000529174.1;ENST00000530467.5;ENST00000531968.5;ENST00000532421.5;ENST00000532519.6;ENST00000534233.5;ENST00000543287.5;ENST00000610597.1;ENST00000612687.4;ENST00000614711.4;ENST00000617285.5;ENST00000621959.4;ENST00000622474.4;ENST00000652093.1	5UTR	83	29	17	1		59	18	13	0
chr11	119057090	119057091	bulges	-	chr11:119057089-119057107:-	FALSE	5'- GGGCGCGGGTGGGGGGCGCTGCCGGCCT -3' rG4seq-K ----------------*-----------	HYOU1|ENSG00000149428.20	ENST00000526354.1;ENST00000527038.6;ENST00000529174.1;ENST00000530467.5;ENST00000531968.5;ENST00000532421.5;ENST00000532519.6;ENST00000534233.5;ENST00000543287.5;ENST00000610597.1;ENST00000612687.4;ENST00000614711.4;ENST00000617285.5;ENST00000621959.4;ENST00000622474.4;ENST00000652093.1	5UTR	43	30	6	1		27	20	7	1
chr11	126266253	126266254	bulges	-	chr11:126266251-126266272:-	FALSE	5'- GGGACTGGGTCTGGGGGGCAGCTTCAGGATC -3' rG4seq-K ------------------*------------	SRPRA|ENSG00000182934.12	ENST00000332118.11;ENST00000527817.1;ENST00000532259.1	CDS	25	16	10	1		31	20	12	1
chr12	46185763	46185765	bulges	-	chr12:46185763-46185784:-	FALSE	5'- GGGTGAAGGAGGGTGAGGGGGCCTCTCATGG -3' rG4seq-K -------------------**----------	SLC38A1|ENSG00000111371.16	ENST00000398637.10	3UTR	9	6	18	1		36	19	16	0
chr12	52904798	52904799	bulges	-	chr12:52904796-52904831:-	FALSE	5'- GGCGGCGGCTATGGTGGGGCCAGCGGCATGGGAGGCATCACCGCA -3' rG4seq-K --------------------------------*------------	KRT8|ENSG00000170421.13	ENST00000293308.11;ENST00000546542.1;ENST00000546583.5;ENST00000546826.5;ENST00000546897.5;ENST00000548998.5;ENST00000550170.5;ENST00000552150.5;ENST00000552551.5;ENST00000692008.1	CDS	115	43	82	12		106	41	47	5
chr12	56645917	56645918	bulges	-	chr12:56645917-56645949:-	FALSE	5'- GGGTCGGGTGGCCGCTGCTCCGGCCTCCGGGGCCTTGCGGAG -3' rG4seq-K -------------------------------*----------	ATP5F1B|ENSG00000110955.9	ENST00000262030.8;ENST00000547808.5;ENST00000548647.1;ENST00000551020.5;ENST00000552959.5;ENST00000553007.2	CDS	86	41	65	4		86	45	43	3
chr12	56645937	56645938	bulges	-	chr12:56645935-56645958:-	FALSE	5'- GGGGTTTGTGGGTCGGGTGGCCGCTGCTCCGGC -3' rG4seq-K --------------------*------------	ATP5F1B|ENSG00000110955.9	ENST00000262030.8;ENST00000547808.5;ENST00000551020.5;ENST00000552959.5;ENST00000553007.2	CDS	38	26	31	8		31	21	17	3
chr12	76029665	76029666	two-quartet	-	chr12:76029665-76029679:-	FALSE	5'- GGGCGGTGGAGGGGAAAACATTAA -3' rG4seq-K -------------*----------	PHLDA1|ENSG00000139289.14	ENST00000266671.10;ENST00000602540.5;ENST00000619060.1	3UTR	77	62	23	3		70	57	10	0
chr12	110742712	110742713	bulges	-	chr12:110742713-110742731:-	FALSE	5'- GGGAGGGTCGGCGGTGGGAAGGCGATGG -3' rG4seq-K ------------------*---------	PPP1CC|ENSG00000186298.12	ENST00000335007.10;ENST00000340766.9;ENST00000550991.5;ENST00000551676.5;ENST00000551690.1;ENST00000620030.1	5UTR	67	61	16	2		59	56	10	2
chr12	120465674	120465675	bulges	-	chr12:120465672-120465705:-	FALSE	5'- GGAGGTCGGGGTGGGTGGCCCCGTGGTGGGAGGAATGGGCCTC -3' rG4seq-K ------------------------------*------------	SRSF9|ENSG00000111786.9	ENST00000229390.8;ENST00000546942.1;ENST00000550458.1;ENST00000603963.1	CDS	28	22	10	0		32	23	6	0
chr13	37059583	37059584	potential G-quadruplex & G>=40%	-	chr13:37059583-37059643:-	FALSE	5'- CACTGAGCCGCCGACGGGGCGGGTGGGCTTTGCTGCCGAGCAGGCGGCGCCGTCTTGGGGCCTAGCGGCG -3' rG4seq-K -----------------------------------------------------------*----------	SUPT20H|ENSG00000102710.21	ENST00000350612.11;ENST00000356185.7;ENST00000360252.8;ENST00000464572.5;ENST00000470359.2;ENST00000475892.5;ENST00000476109.5;ENST00000495071.6;ENST00000497318.1	5UTR	14	8	9	0		11	7	6	0
chr13	45340713	45340715	two-quartet	-	chr13:45340711-45340718:-,chr13:45340164-45340184:-	TRUE	5'- GGGGAAGATGGTCAGTAGGACAGAAGGTAACATTGAT -3' rG4seq-K ---**--------------------------------	TPT1|ENSG00000133112.17	ENST00000309246.9;ENST00000379055.5;ENST00000379056.5;ENST00000379060.8;ENST00000442760.2;ENST00000490277.1;ENST00000527226.2;ENST00000529421.5;ENST00000530705.6;ENST00000533567.5;ENST00000616577.4	5UTR;CDS	1102	553	334	57		847	442	177	37
chr14	23061425	23061426	longloop	-	chr14:23061426-23061459:-	FALSE	5'- GGGCAGAACGGGAACGGGAAATGGAGCGGCGGGAGCGGACTCG -3' rG4seq-K ---------------------------------*---------	ACIN1|ENSG00000100813.15	ENST00000262710.5;ENST00000338631.10;ENST00000357481.6;ENST00000397341.7;ENST00000457657.5;ENST00000473758.5;ENST00000555053.5;ENST00000557515.5;ENST00000605057.6	3UTR;CDS	35	31	8	1		29	26	6	1
chr14	69380503	69380505	canonical/G3L1-7	-	chr14:69380504-69380521:-	FALSE	5'- GGGGGGGTTGGGGTGGGCTTGGAACAC -3' rG4seq-K ----------------**---------	ERH|ENSG00000100632.11	ENST00000216520.6;ENST00000557016.6	3UTR	105	90	42	14		76	71	11	7
chr14	94079472	94079473	two-quartet	-	chr14:94079473-94079488:-	FALSE	5'- GGAGGAGGAGGAGGGAAAGTCTAGC -3' rG4seq-K ---------------*---------	DDX24|ENSG00000089737.18	ENST00000330836.9;ENST00000544005.5;ENST00000555054.1;ENST00000555324.1;ENST00000555762.1;ENST00000621632.5	CDS	29	21	12	2		26	20	8	1
chr14	103520012	103520013	bulges	-	chr14:103520121-103520122:-,chr14:103520014-103520042:-	TRUE	5'- GGCGGTGTGGACACGGCTGCGGTGGGCGGGGTCTTCGAC -3' rG4seq-K ------------------------------*--------	CKB|ENSG00000166165.14	ENST00000348956.7;ENST00000553528.5;ENST00000553610.5;ENST00000553652.5;ENST00000554282.5;ENST00000554989.1;ENST00000555039.1;ENST00000689346.1	3UTR;CDS	39	32	15	3		36	32	9	0
chr15	41900942	41900943	bulges	-	chr15:41900943-41900978:-	FALSE	5'- GGGTGCCAAGGAGGGCGCCGACGAGGAGGAGTGGGTCGTGGCCAA -3' rG4seq-K -----------------------------------*---------	EHD4|ENSG00000103966.11	ENST00000220325.9	CDS	16	12	6	1		20	14	8	1
chr15	41972460	41972461	bulges	-	chr15:41972461-41972480:-	FALSE	5'- GGGGCGGCAGGCGGGCGGGCGCGAACGCG -3' rG4seq-K -------------------*---------	EHD4|ENSG00000103966.11	ENST00000220325.9;ENST00000569223.1	CDS	47	41	9	4		65	60	9	1
chr15	64156125	64156126	bulges	-	chr15:64156724-64156733:-,chr15:64156127-64156145:-	TRUE	5'- GAGGGCATGGAGGTGGTGCGGAAGGTGGAGAGCACCA -3' rG4seq-K ----------------------------*--------	PPIB|ENSG00000166794.6	ENST00000300026.4;ENST00000561048.2;ENST00000680158.1;ENST00000680343.1;ENST00000681397.1;ENST00000681658.1	3UTR;CDS	58	35	28	3		44	27	20	4
chr15	101277418	101277419	bulges	-	chr15:101277419-101277452:-	FALSE	5'- GGCGGCAGGGCTGGGCGGCGGCGGCGGCGGCGGTCATGGAACG -3' rG4seq-K ---------------------------------*---------	SELENOS|ENSG00000131871.15	ENST00000398226.7;ENST00000526043.1;ENST00000526049.6;ENST00000527833.5;ENST00000529968.1;ENST00000534014.1	5UTR	56	23	14	1		55	24	12	1
chr16	2268058	2268060	bulges	-	chr16:2268060-2268097:-	FALSE	5'- GGCGGCTGAGGAAAGCAGGAGGAGGTGGCGGCGGCGGGAAGATGGCT -3' rG4seq-K -------------------------------------**--------	RNPS1|ENSG00000205937.12	ENST00000301730.12;ENST00000320225.10;ENST00000561718.5;ENST00000562690.5;ENST00000564311.5;ENST00000564822.1;ENST00000566458.5;ENST00000567147.5;ENST00000569598.6;ENST00000570051.5	5UTR	86	56	37	4		64	39	18	4
chr16	66934334	66934335	two-quartet	-	chr16:66934335-66934362:-	FALSE	5'- GGTAGGCGGCGGCGGGGTCGGCGGCGGCCTCCTGGAG -3' rG4seq-K ---------------------------*---------	CIAO2B|ENSG00000166595.12	ENST00000422424.7;ENST00000562362.5;ENST00000563490.1;ENST00000567511.1;ENST00000569299.1	CDS	28	17	13	0		28	21	9	1
chr16	87832370	87832371	canonical/G3L1-7	-	chr16:87832371-87832402:-	FALSE	5'- GGGAGGGGGTGGGGGATCTGGGCAAGGTGGGTGATTCCTCC -3' rG4seq-K -------------------------------*---------	SLC7A5|ENSG00000103257.9	ENST00000261622.5;ENST00000565644.5	3UTR	73	35	21	2		80	44	8	1
chr17	1344941	1344942	two-quartet	-	chr17:1344942-1344965:-	FALSE	5'- GGTTAAAGGTGGTTTGGGGAGGGACTTCGTTGT -3' rG4seq-K -----------------------*---------	YWHAE|ENSG00000108953.17	ENST00000264335.13;ENST00000466227.6;ENST00000571732.5;ENST00000573026.1	3UTR	84	62	14	2		63	50	17	1
chr17	1562684	1562685	bulges	-	chr17:1562686-1562727:-	FALSE	5'- GGCGGCAGGAGCCGGCGCGGCGACCGCGGCGAGGGCGGCGGGGACGGAGCA -3' rG4seq-K ------------------------------------------*--------	PITPNA|ENSG00000174238.16	ENST00000313486.12;ENST00000575288.5;ENST00000576010.6;ENST00000576722.5;ENST00000576761.5	5UTR	15	14	10	1		22	15	7	0
chr17	7260209	7260211	canonical/G3L1-7	-	chr17:7260210-7260228:-	FALSE	5'- GGGTTGGGGGTGGGGGGGTGCCGTTGGT -3' rG4seq-K -----------------**---------	CLDN7|ENSG00000181885.18;ENSG00000262302|ENSG00000262302.1	ENST00000360325.11;ENST00000397317.8;ENST00000538261.7;ENST00000577138.1	3UTR;non_coding	162	129	101	9		161	123	30	3
chr17	29263856	29263857	canonical/G3L1-7	-	chr17:29263857-29263877:-	FALSE	5'- GGGGCGGGGATAGGGGAGGGCATTGAAGTT -3' rG4seq-K --------------------*---------	NUFIP2|ENSG00000108256.9	ENST00000225388.9	3UTR	47	45	9	5		41	37	6	3
chr17	41523671	41523672	canonical/G3L1-7	-	chr17:41523672-41523696:-	FALSE	5'- GGGTAGAGGGATGGGAAGGAAGGGACCCTTACCC -3' rG4seq-K ------------------------*---------	KRT19|ENSG00000171345.13	ENST00000361566.7	3UTR	257	117	45	1		215	115	28	0
chr17	41523680	41523681	longloop	-	chr17:41523681-41523707:-	FALSE	5'- GGGTGTCTTCTGGGTAGAGGGATGGGAAGGAAGGGA -3' rG4seq-K --------------------------*---------	KRT19|ENSG00000171345.13	ENST00000361566.7	3UTR	104	82	39	1		75	73	24	2
chr17	42125074	42125076	canonical/G3L1-7	-	chr17:42125075-42125103:-	FALSE	5'- GGGTGGGTAAGGGGGGGAGTGGGAGGGGACGGAACCAA -3' rG4seq-K ---------------------------**---------	ENSG00000267261|ENSG00000267261.5;RAB5C|ENSG00000108774.15	ENST00000346213.9;ENST00000393860.7;ENST00000585562.5;ENST00000592248.5;ENST00000592574.1	3UTR;non_coding	91	44	27	4		88	44	16	3
chr17	50382562	50382563	longloop	-	chr17:50382563-50382597:-	FALSE	5'- GGGAATCAGGGTAGATCAGGAGGAACTGGGGGGGACTAGAACAC -3' rG4seq-K ----------------------------------*---------	LRRC59|ENSG00000108829.10	ENST00000225972.8;ENST00000503118.2	3UTR	30	11	19	1		23	14	13	2
chr17	50382764	50382768	canonical/G3L1-7	-	chr17:50382765-50382791:-	FALSE	5'- GGGAGGTGGCGGGGGGGCGTGGGGGGCAGTTACCTG -3' rG4seq-K -----------------------****---------	LRRC59|ENSG00000108829.10	ENST00000225972.8;ENST00000503118.2	3UTR	290	90	169	13		378	92	85	6
chr17	50383108	50383109	bulges	-	chr17:50383109-50383132:-	FALSE	5'- GGGAGGGCTGGTTGCTTGTCGGGTGACAGAGCT -3' rG4seq-K -----------------------*---------	LRRC59|ENSG00000108829.10	ENST00000225972.8;ENST00000503118.2	CDS	64	40	10	1		59	41	9	1
chr17	50397399	50397400	bulges	-	chr17:50397397-50397427:-	FALSE	5'- GGGCTCAGGCGTCGTCGTTTGGGTGGGGGGCCGCTGAACT -3' rG4seq-K ---------------------------*------------	LRRC59|ENSG00000108829.10	ENST00000225972.8;ENST00000576448.1	5UTR	28	16	15	0		22	14	9	1
chr17	50979843	50979845	bulges	-	chr17:50979844-50979865:-	FALSE	5'- GGGTGGGGGATGGCGTGTGGGTCTCCATTCG -3' rG4seq-K --------------------**---------	SPAG9|ENSG00000008294.22	ENST00000262013.12;ENST00000357122.8;ENST00000505279.5;ENST00000510283.5;ENST00000511312.2;ENST00000513746.6	3UTR;CDS	70	57	20	3		43	36	14	0
chr17	56891549	56891550	canonical/G3L1-7	-	chr17:56891550-56891578:-	FALSE	5'- GGGAGCTGGCGGGAGGGTGGGAGGTGGGATTTAGCCAG -3' rG4seq-K ----------------------------*---------	TRIM25|ENSG00000121060.19	ENST00000316881.9;ENST00000537230.3;ENST00000648772.1;ENST00000682766.1	3UTR	23	14	18	3		18	10	6	0
chr17	58003622	58003624	potential G-quadruplex & G>=40%	-	chr17:58003622-58003682:-	FALSE	5'- ATCTCCTTGGAAGGATTCAGCACGAGTAGATGGTAAACATTTAAAGGGGAAAGGGGGGGTTTGTTTAAAA -3' rG4seq-K ----------------------------------------------------------**----------	ENSG00000266086|ENSG00000266086.3;SRSF1|ENSG00000136450.13	ENST00000258962.5;ENST00000578794.2;ENST00000581497.1;ENST00000582730.6;ENST00000665125.1	3UTR	53	25	23	2		54	28	15	1
chr17	58006406	58006407	bulges	-	chr17:58006405-58006432:-	FALSE	5'- GAGGCGGCGGCGGGGGTGGAGGTGGCGGAGCTCCCCG -3' rG4seq-K -------------------------*-----------	ENSG00000266086|ENSG00000266086.3;SRSF1|ENSG00000136450.13	ENST00000258962.5;ENST00000578430.1;ENST00000578794.2;ENST00000581979.5;ENST00000582730.6;ENST00000583741.1;ENST00000584773.5;ENST00000585096.1	3UTR;CDS	23	19	13	3		24	20	6	0
chr17	81843271	81843272	potential G-quadruplex & G>=40%	-	chr17:81843271-81843331:-	FALSE	5'- CTCTACAGCACGGCCTGTGGCCTGTTCAAGGCAGAACCACGACCCTTGACTCCCGGGTGGGGAGGTGGCC -3' rG4seq-K -----------------------------------------------------------*----------	P4HB|ENSG00000185624.16	ENST00000331483.9;ENST00000415593.6;ENST00000439918.7;ENST00000466567.3;ENST00000472244.6;ENST00000473021.2;ENST00000474712.2;ENST00000476482.2;ENST00000477607.7;ENST00000484286.2;ENST00000571507.6;ENST00000571617.2;ENST00000574914.2;ENST00000575069.6;ENST00000576390.6;ENST00000679366.1;ENST00000679396.1;ENST00000679439.1;ENST00000679455.1;ENST00000679470.1;ENST00000679628.1;ENST00000679688.1;ENS…	3UTR	48	22	71	11		39	19	41	7
chr17	81845151	81845152	two-quartet	-	chr17:81845151-81845180:-	FALSE	5'- GGAGAGCGGTGGCCAGGATGGGGCAGGGGATGATGACGA -3' rG4seq-K ----------------------------*----------	P4HB|ENSG00000185624.16	ENST00000331483.9;ENST00000415593.6;ENST00000439918.7;ENST00000466567.3;ENST00000472244.6;ENST00000473021.2;ENST00000474712.2;ENST00000476482.2;ENST00000477607.7;ENST00000484286.2;ENST00000570907.6;ENST00000571507.6;ENST00000571617.2;ENST00000574914.2;ENST00000575069.6;ENST00000576390.6;ENST00000679366.1;ENST00000679396.1;ENST00000679439.1;ENST00000679455.1;ENST00000679470.1;ENST00000679628.1;ENS…	3UTR;CDS	87	58	36	1		65	43	18	4
chr19	2038177	2038179	bulges	-	chr19:2038176-2038196:-	FALSE	5'- GGGGGGCCTGGGGGTGGGGGCCTCGGAGAC -3' rG4seq-K -----------------**-----------	MKNK2|ENSG00000099875.16	ENST00000250896.9;ENST00000309340.11;ENST00000587416.5;ENST00000589441.5;ENST00000591142.5	3UTR	87	53	34	3		93	58	17	3
chr19	2101714	2101716	bulges	-	chr19:2101715-2101747:-	FALSE	5'- GACGGTTGCGTCCGGGGGAGGGGAAGGAAGGGCCGCTGTCGC -3' rG4seq-K -------------------------------**---------	AP3D1|ENSG00000065000.19	ENST00000345016.9;ENST00000585652.5;ENST00000586370.6;ENST00000589223.5;ENST00000591650.1;ENST00000643116.3;ENST00000644728.1	3UTR	56	33	23	2		32	23	29	2
chr19	2321650	2321651	bulges	-	chr19:2321651-2321672:-	FALSE	5'- GGGGGCGCGGGGGGTGCAGGGCAGGCCCGAG -3' rG4seq-K ---------------------*---------	LSM7|ENSG00000130332.15	ENST00000252622.15;ENST00000585395.6;ENST00000585409.2;ENST00000587502.2;ENST00000589532.5;ENST00000591515.6	3UTR	28	18	13	0		22	11	11	0
chr19	2429684	2429685	bulges	-	chr19:2429684-2429704:-	FALSE	5'- GGGGTGGCGTGGGGCTGGGGCACCCTCCGA -3' rG4seq-K -------------------*----------	LMNB2|ENSG00000176619.13	ENST00000325327.4;ENST00000475819.1;ENST00000532465.1	3UTR	49	45	18	1		50	44	7	2
chr19	3976289	3976291	canonical/G3L1-7	-	chr19:3976290-3976312:-	FALSE	5'- GGGGAGGGGGAGGCGGGATGGGACACCCAACA -3' rG4seq-K ---------------------**---------	EEF2|ENSG00000167658.16	ENST00000309311.7;ENST00000600794.1	3UTR;CDS	1129	471	433	33		999	418	196	18
chr19	3976294	3976296	canonical/G3L1-7	-	chr19:3976295-3976321:-	FALSE	5'- GGGCCGGTCGGGGAGGGGGAGGCGGGATGGGACACC -3' rG4seq-K -------------------------**---------	EEF2|ENSG00000167658.16	ENST00000309311.7;ENST00000600794.1	3UTR;CDS	341	210	337	61		321	198	165	17
chr19	3982287	3982288	longloop	-	chr19:3982288-3982320:-	FALSE	5'- GGGGGAGGGCCAGTTGGGGCCTGCCGAGCGGGCCAAGAAAGT -3' rG4seq-K --------------------------------*---------	EEF2|ENSG00000167658.16	ENST00000309311.7;ENST00000598182.5;ENST00000598436.1	CDS	69	22	74	3		57	15	41	2
chr19	3982371	3982372	longloop	-	chr19:3982372-3982401:-	FALSE	5'- GGGCTTTGGGTCTGGCCTCCACGGGTGGGCCTTCACCCT -3' rG4seq-K -----------------------------*---------	EEF2|ENSG00000167658.16	ENST00000309311.7;ENST00000598436.1	CDS	83	41	76	2		73	41	56	6
chr19	10119655	10119656	bulges	-	chr19:10119653-10119676:-,chr19:10119252-10119255:-	TRUE	5'- GGTGGAGGAGGAGGGGGAGGACGGCGTCATCCCAAA -3' rG4seq-K --------------------*---------------	EIF3G|ENSG00000130811.12	ENST00000253108.9;ENST00000587146.5;ENST00000587168.1;ENST00000587681.5;ENST00000587993.5;ENST00000588709.5;ENST00000589009.5;ENST00000589454.5;ENST00000590940.5;ENST00000592485.1;ENST00000593066.5;ENST00000593095.5	CDS	31	12	25	2		39	25	16	4
chr19	14515831	14515832	canonical/G3L1-7	-	chr19:14515832-14515854:-	FALSE	5'- GGGTGGGAGGGCCCAGGGAGGGCTTTCGTACT -3' rG4seq-K ----------------------*---------	DNAJB1|ENSG00000132002.9	ENST00000254322.3;ENST00000396969.8;ENST00000594099.6;ENST00000595139.2;ENST00000595992.6;ENST00000596075.2;ENST00000596853.6;ENST00000598235.2;ENST00000598692.2;ENST00000601533.6;ENST00000676515.1;ENST00000676577.1;ENST00000676982.1;ENST00000677204.1;ENST00000677762.1;ENST00000677848.1;ENST00000678009.1;ENST00000678098.1;ENST00000678338.1;ENST00000679223.1	3UTR	155	76	35	3		123	64	11	2
chr19	14515835	14515836	two-quartet	-	chr19:14515837-14515865:-	FALSE	5'- GGACCATGAGAGGGTGGGAGGGCCCAGGGAGGGCTTTC -3' rG4seq-K -----------------------------*--------	DNAJB1|ENSG00000132002.9	ENST00000254322.3;ENST00000396969.8;ENST00000594099.6;ENST00000595139.2;ENST00000595992.6;ENST00000596075.2;ENST00000596853.6;ENST00000598235.2;ENST00000598692.2;ENST00000601533.6;ENST00000676515.1;ENST00000676577.1;ENST00000676982.1;ENST00000677204.1;ENST00000677762.1;ENST00000677848.1;ENST00000678009.1;ENST00000678098.1;ENST00000678338.1;ENST00000679223.1	3UTR	76	69	29	0		55	52	9	0
chr19	14518351	14518353	bulges	-	chr19:14518351-14518375:-	FALSE	5'- GGGTCGGCGGGCCGCAGGAGGGGGTCATGGGTAA -3' rG4seq-K ----------------------**----------	DNAJB1|ENSG00000132002.9	ENST00000254322.3;ENST00000396969.8;ENST00000594099.6;ENST00000595139.2;ENST00000595992.6;ENST00000596075.2;ENST00000596853.6;ENST00000598692.2;ENST00000601533.6;ENST00000676515.1;ENST00000676982.1;ENST00000677762.1;ENST00000677848.1;ENST00000678009.1;ENST00000678098.1;ENST00000678338.1;ENST00000679223.1	5UTR	47	27	31	1		39	18	24	0
chr19	38847433	38847434	bulges	-	chr19:38849699-38849726:-	FALSE	5'- GGGGCGGCGGGCGGCGGCGGCGGTGGGGAGAACTACG -3' rG4seq-K ---------------------------*---------	HNRNPL|ENSG00000104824.18	ENST00000221419.10;ENST00000388749.7;ENST00000598985.5;ENST00000600873.5;ENST00000601047.5;ENST00000601449.5;ENST00000601813.1	CDS	31	11	20	0		22	11	13	1
chr19	38849834	38849835	bulges	-	chr19:38849832-38849871:-	FALSE	5'- GGTGAAGATGGCGGCGGCGGGCGGCGGAGGCGGCGGTGGCCGCTACTAC -3' rG4seq-K ------------------------------------*------------	HNRNPL|ENSG00000104824.18	ENST00000221419.10;ENST00000388749.7;ENST00000598985.5;ENST00000600873.5;ENST00000601047.5;ENST00000601449.5;ENST00000601813.1	CDS	47	18	17	0		49	21	14	1
chr19	38849837	38849838	bulges	-	chr19:38849836-38849871:-	FALSE	5'- GGTGAAGATGGCGGCGGCGGGCGGCGGAGGCGGCGGTGGCCGCTA -3' rG4seq-K ---------------------------------*-----------	HNRNPL|ENSG00000104824.18	ENST00000221419.10;ENST00000388749.7;ENST00000598985.5;ENST00000600873.5;ENST00000601047.5;ENST00000601449.5;ENST00000601813.1	CDS	28	15	16	1		26	11	12	0
chr19	45609538	45609539	canonical/G3L1-7	-	chr19:45609539-45609561:-	FALSE	5'- GGGGGTTATGGGGGCGGGAGGGTAGACTGACA -3' rG4seq-K ----------------------*---------	EML2|ENSG00000125746.18	ENST00000245925.8;ENST00000536630.5;ENST00000586195.5;ENST00000587152.6;ENST00000588308.5;ENST00000589876.5	3UTR	35	33	10	5		24	24	9	6
chr19	46727497	46727499	bulges	-	chr19:46727498-46727523:-	FALSE	5'- GGGGGCGGGGAGGTGAGCCTGGGGGACTTGGCAGA -3' rG4seq-K ------------------------**---------	STRN4|ENSG00000090372.15	ENST00000263280.11;ENST00000391910.7;ENST00000435164.6;ENST00000539396.5;ENST00000594287.6;ENST00000594357.6;ENST00000595357.5;ENST00000599231.5;ENST00000600358.7;ENST00000601631.6;ENST00000602223.5	3UTR;CDS	51	26	19	1		41	16	12	0
chr19	48382668	48382670	longloop	-	chr19:48382668-48382700:-	FALSE	5'- GGGGGGCCCGGGGCTCAAGTGCGGGAAGGGGGCTGGCCCGAG -3' rG4seq-K ------------------------------**----------	KDELR1|ENSG00000105438.9	ENST00000330720.7;ENST00000597017.5	3UTR	73	38	22	2		45	31	14	1
chr2	10787371	10787373	two-quartet	-	chr2:10787372-10787391:-	FALSE	5'- GGGGATTGGAGGGTTTGGGTACCCCGCCA -3' rG4seq-K ------------------**---------	PDIA6|ENSG00000143870.13	ENST00000272227.8;ENST00000381611.8;ENST00000404371.6;ENST00000404824.2;ENST00000540494.5;ENST00000617249.4	CDS	122	84	63	7		103	74	34	4
chr2	10787428	10787429	two-quartet	-	chr2:10788696-10788700:-,chr2:10787429-10787439:-	TRUE	5'- GGGGGTGGCTGTGGACAGAAGCTG -3' rG4seq-K --------------*---------	PDIA6|ENSG00000143870.13	ENST00000272227.8;ENST00000381611.8;ENST00000404371.6;ENST00000404824.2;ENST00000540494.5;ENST00000617249.4	CDS	36	17	25	1		40	27	11	1
chr2	10812720	10812722	two-quartet	-	chr2:10812720-10812746:-	FALSE	5'- GGGCTGAAGCGGCGGCGGCGGTGGGGACTGCACGTA -3' rG4seq-K ------------------------**----------	PDIA6|ENSG00000143870.13	ENST00000272227.8;ENST00000381611.8;ENST00000404371.6;ENST00000404824.2;ENST00000489662.1;ENST00000540494.5;ENST00000617249.4	5UTR	67	45	26	2		49	34	13	2
chr2	20032920	20032921	canonical/G3L1-7	-	chr2:20032921-20032944:-	FALSE	5'- GGGGGGTGGGAAGGGAAAGAGGGTACTTGCCAC -3' rG4seq-K -----------------------*---------	LAPTM4A|ENSG00000068697.7	ENST00000175091.5	3UTR	103	84	23	7		68	56	9	1
chr2	54973080	54973081	two-quartet	-	chr2:54973081-54973096:-	FALSE	5'- GGGGGAGGGTCAGGGAAGAACGAAC -3' rG4seq-K ---------------*---------	RTN4|ENSG00000115310.19	ENST00000317610.11;ENST00000337526.11;ENST00000357376.7;ENST00000357732.8;ENST00000394609.6;ENST00000394611.6;ENST00000404909.5;ENST00000405240.5;ENST00000485749.1;ENST00000486085.5;ENST00000491592.1	3UTR	47	35	17	5		33	23	13	3
chr2	74461256	74461257	bulges	-	chr2:74461256-74461273:-	FALSE	5'- GGGAGGGAGAGGAGGGGAGCCAAGACA -3' rG4seq-K ----------------*----------	MOGS|ENSG00000115275.15	ENST00000409065.5;ENST00000448666.7;ENST00000452063.7;ENST00000462189.1;ENST00000462443.2;ENST00000647723.1;ENST00000647753.1;ENST00000647771.1;ENST00000647915.1;ENST00000648768.1;ENST00000648810.1;ENST00000649075.1;ENST00000649601.1;ENST00000649777.1;ENST00000649854.1;ENST00000690565.1	3UTR	36	35	11	7		23	21	10	5
chr2	231455229	231455230	bulges	-	chr2:231455228-231455264:-	FALSE	5'- GAGGAGGCTTCCGAGGAGGCAGAGGAGGAGGAGGTGACCACAAGCC -3' rG4seq-K ----------------------------------*-----------	NCL|ENSG00000115053.17	ENST00000322723.9;ENST00000356936.6;ENST00000417652.6;ENST00000436894.2;ENST00000453992.6;ENST00000454824.6;ENST00000461347.5;ENST00000676514.1;ENST00000676690.1;ENST00000676798.1;ENST00000676913.1;ENST00000677703.1;ENST00000678131.1;ENST00000678246.1;ENST00000678364.1;ENST00000678405.1;ENST00000678729.1;ENST00000678828.1;ENST00000678849.1;ENST00000679348.1	3UTR;CDS	83	42	40	6		55	32	28	3
chr2	231455431	231455432	bulges	-	chr2:231455432-231455467:-	FALSE	5'- GGAGGACGAGGTGGTGGTAGAGGAGGCCGAGGAGGATTTGGTGGC -3' rG4seq-K -----------------------------------*---------	NCL|ENSG00000115053.17	ENST00000322723.9;ENST00000356936.6;ENST00000417652.6;ENST00000436894.2;ENST00000453992.6;ENST00000454824.6;ENST00000461347.5;ENST00000676514.1;ENST00000676690.1;ENST00000676798.1;ENST00000676913.1;ENST00000677703.1;ENST00000677786.1;ENST00000678131.1;ENST00000678246.1;ENST00000678364.1;ENST00000678405.1;ENST00000678729.1;ENST00000678828.1;ENST00000678849.1;ENST00000679348.1	3UTR;CDS	79	32	52	4		76	24	25	0
chr2	231455482	231455483	two-quartet	-	chr2:231455480-231455506:-	FALSE	5'- GGTGGCTTCGGGGGTCGTGGTGGAGGCAGAGGCGGC -3' rG4seq-K -----------------------*------------	NCL|ENSG00000115053.17	ENST00000322723.9;ENST00000356936.6;ENST00000417652.6;ENST00000436894.2;ENST00000453992.6;ENST00000454824.6;ENST00000461347.5;ENST00000676514.1;ENST00000676690.1;ENST00000676798.1;ENST00000676913.1;ENST00000677703.1;ENST00000677786.1;ENST00000678131.1;ENST00000678246.1;ENST00000678364.1;ENST00000678405.1;ENST00000678729.1;ENST00000678828.1;ENST00000678849.1;ENST00000679348.1	3UTR;CDS	35	19	30	5		31	16	21	0
chr2	231460670	231460671	bulges	-	chr2:231460671-231460696:-	FALSE	5'- GAGGAGGAGGAAGAAGAGGAGGAGGAAGAGCCTGT -3' rG4seq-K -------------------------*---------	NCL|ENSG00000115053.17	ENST00000322723.9;ENST00000356936.6;ENST00000417652.6;ENST00000436894.2;ENST00000453992.6;ENST00000454824.6;ENST00000461347.5;ENST00000494618.1;ENST00000676514.1;ENST00000676690.1;ENST00000676798.1;ENST00000676913.1;ENST00000677703.1;ENST00000677786.1;ENST00000678131.1;ENST00000678246.1;ENST00000678364.1;ENST00000678405.1;ENST00000678729.1;ENST00000678828.1;ENST00000678849.1;ENST00000679348.1	CDS	83	61	42	6		80	64	18	1
chr20	646703	646705	two-quartet	-	chr20:646704-646724:-	FALSE	5'- GGGGTAGGCTGGGTGAAGGGTATACAGGAA -3' rG4seq-K -------------------**---------	ENSG00000270299|ENSG00000270299.1;SRXN1|ENSG00000271303.2	ENST00000381962.4;ENST00000488788.2	3UTR	43	27	15	2		51	36	13	1
chr20	648113	648114	two-quartet	-	chr20:648114-648142:-	FALSE	5'- GGAAGGAGGGGTGGAGGAAGAGGAAGGGCCAAACTAGC -3' rG4seq-K ----------------------------*---------	ENSG00000270299|ENSG00000270299.1;SRXN1|ENSG00000271303.2	ENST00000381962.4;ENST00000488788.2	3UTR	30	15	11	0		14	7	8	0
chr20	17613810	17613811	canonical/G3L1-7	-	chr20:17613811-17613835:-	FALSE	5'- GGGGCGGGGCGGGAAGCGGGTGGGACCGGGCAGC -3' rG4seq-K ------------------------*---------	RRBP1|ENSG00000125844.17	ENST00000246043.8;ENST00000360807.8;ENST00000377807.6;ENST00000377813.6;ENST00000468428.1;ENST00000470422.5	3UTR	52	29	12	2		44	25	11	0
chr20	17613814	17613816	bulges	-	chr20:17613816-17613835:-	FALSE	5'- GGGGCGGGGCGGGAAGCGGGTGGGACCGG -3' rG4seq-K -------------------**--------	RRBP1|ENSG00000125844.17	ENST00000246043.8;ENST00000360807.8;ENST00000377807.6;ENST00000377813.6;ENST00000468428.1;ENST00000470422.5	3UTR	23	14	19	1		13	8	20	2
chr20	17682159	17682160	bulges	-	chr20:17682160-17682179:-	FALSE	5'- GGGGCGGGCGGCGTCAGGGTCGCAGCGTC -3' rG4seq-K -------------------*---------	RRBP1|ENSG00000125844.17	ENST00000360807.8;ENST00000377807.6;ENST00000377813.6;ENST00000398782.2	5UTR	18	14	9	2		20	16	7	0
chr20	45325613	45325614	canonical/G3L1-7	-	chr20:45325614-45325641:-	FALSE	5'- GGGTAGGGGGGGGGGAATGGGGGAGGGCTGATGAGGC -3' rG4seq-K ---------------------------*---------	SDC4|ENSG00000124145.6	ENST00000372733.3	3UTR	46	36	8	2		50	30	6	0
chr20	63495047	63495048	bulges	-	chr20:63495048-63495072:-	FALSE	5'- GGGCGTGGGCGAGTTCGAGGCGGGCATCTCCAAG -3' rG4seq-K ------------------------*---------	EEF1A2|ENSG00000101210.13	ENST00000217182.6;ENST00000298049.12;ENST00000642899.1;ENST00000645357.1;ENST00000645586.1;ENST00000675519.1	3UTR;CDS	35	22	24	0		50	28	17	0
chr20	63496023	63496025	two-quartet	-	chr20:63497619-63497632:-,chr20:63496024-63496035:-	TRUE	5'- GGAGGCGGCTGAGATGGGGAAGGGATCCTTCAAG -3' rG4seq-K -----------------------**---------	EEF1A2|ENSG00000101210.13	ENST00000217182.6;ENST00000298049.12;ENST00000642899.1;ENST00000643976.1;ENST00000645357.1;ENST00000645586.1;ENST00000646335.1;ENST00000675519.1	3UTR;CDS	57	28	26	0		38	17	24	1
chr20	63572693	63572694	canonical/G3L1-7	-	chr20:63572693-63572716:-	FALSE	5'- GGGCAGCGGGGCCCAGGGAGGGGCAGGCCGGGC -3' rG4seq-K ----------------------*----------	HELZ2|ENSG00000130589.16	ENST00000370082.1;ENST00000479540.5	non_coding	28	24	6	1		28	22	8	2
chr22	36301606	36301607	two-quartet	-	chr22:36301607-36301630:-	FALSE	5'- GGAGATGATGGCCAAGGAGGAGGAGCTGGTGAA -3' rG4seq-K -----------------------*---------	MYH9|ENSG00000100345.23	ENST00000216181.11;ENST00000495928.1;ENST00000685801.1;ENST00000691109.1	CDS	20	15	9	2		23	20	9	0
chr22	38486435	38486436	bulges	-	chr22:38487872-38487909:-,chr22:38486436-38486440:-	TRUE	5'- GTGGACCACAGAGGAGGCGGCGGAGGCGGGGGTAAGGGTGGTCGTTCTCGT -3' rG4seq-K -----------------------------------------*---------	DDX17|ENSG00000100201.23	ENST00000216019.11;ENST00000396821.8;ENST00000403230.3;ENST00000431312.2	CDS	85	68	18	5		73	66	16	2
chr22	42870022	42870024	canonical/G3L1-7	-	chr22:42870022-42870052:-	FALSE	5'- GGGCCGGCGGGGGTGGGGGGAACGTGGGGGAACCTGTGTT -3' rG4seq-K ----------------------------**----------	PACSIN2|ENSG00000100266.19	ENST00000263246.8;ENST00000337959.8;ENST00000407585.5;ENST00000507586.1	3UTR	39	23	27	2		43	27	19	4
chr3	10305126	10305127	bulges	-	chr3:10305125-10305156:-	FALSE	5'- GGAGGAGGAGGACGGCCAGTGGAAGGAGGAGCAGAAGCTAG -3' rG4seq-K -----------------------------*-----------	SEC13|ENSG00000157020.18	ENST00000337354.8;ENST00000350697.8;ENST00000383801.6;ENST00000397109.7;ENST00000397117.5;ENST00000476597.1;ENST00000477547.6;ENST00000479868.6;ENST00000490283.1	CDS	33	29	12	0		36	32	11	0
chr3	49026345	49026346	bulges	-	chr3:49026346-49026365:-	FALSE	5'- GGGTGGGCATGGGAAGTGGCTCCATCTGC -3' rG4seq-K -------------------*---------	IMPDH2|ENSG00000178035.13	ENST00000326739.9;ENST00000429182.6;ENST00000442157.2;ENST00000462980.2;ENST00000472328.2;ENST00000491610.2;ENST00000676607.1;ENST00000676627.1;ENST00000676708.1;ENST00000676864.1;ENST00000677010.1;ENST00000677108.1;ENST00000677168.1;ENST00000677185.1;ENST00000677205.1;ENST00000677344.1;ENST00000677480.1;ENST00000677519.1;ENST00000677593.1;ENST00000677740.1;ENST00000677991.1;ENST00000678001.1;ENS…	3UTR;CDS	39	27	19	1		48	34	6	0
chr3	53225730	53225731	longloop	-	chr3:53225729-53225756:-	FALSE	5'- GGGCGGGTATGAAGTGTGGGGCGGGGGTCTATACATT -3' rG4seq-K -------------------------*-----------	TKT|ENSG00000163931.17	ENST00000423516.5;ENST00000423525.6;ENST00000450814.6;ENST00000460343.5;ENST00000461139.5;ENST00000462138.6;ENST00000469678.1	3UTR	76	66	18	5		62	54	9	1
chr3	150543282	150543283	two-quartet	-	chr3:150543283-150543309:-	FALSE	5'- GGTAAGGGTGAGGGTCATAGGGCAGGTTTTGGGTTT -3' rG4seq-K --------------------------*---------	SERP1|ENSG00000120742.11	ENST00000239944.7;ENST00000479209.1	3UTR	47	41	16	1		40	31	7	1
chr3	150546147	150546148	two-quartet	-	chr3:150546148-150546168:-	FALSE	5'- GGGGTGGCCGGGGCAGGTGGTGGCGCCGCG -3' rG4seq-K --------------------*---------	SERP1|ENSG00000120742.11	ENST00000239944.7;ENST00000479209.1;ENST00000487153.1;ENST00000491660.1	5UTR	81	23	26	0		85	21	17	0
chr3	150546150	150546151	two-quartet	-	chr3:150546148-150546168:-	FALSE	5'- GGGGTGGCCGGGGCAGGTGGTGGCGCCGCG -3' rG4seq-K -----------------*------------	SERP1|ENSG00000120742.11	ENST00000239944.7;ENST00000479209.1;ENST00000487153.1;ENST00000491660.1	5UTR	47	33	22	1		49	38	15	0
chr3	156543120	156543122	bulges	-	chr3:156543121-156543149:-	FALSE	5'- GGAAAAGTAGCAGGGTGGTCAGGGTGGGAGACACAAGA -3' rG4seq-K ---------------------------**---------	SSR3|ENSG00000114850.7	ENST00000265044.7;ENST00000463503.5;ENST00000464138.1;ENST00000467789.5;ENST00000476217.5;ENST00000478842.5;ENST00000498205.5	3UTR	126	85	29	6		84	58	18	3
chr3	185919471	185919473	bulges	-	chr3:185921103-185921104:-,chr3:185919472-185919496:-	TRUE	5'- GAGGAGGAGGTGGAGGAGGAGGAGGATGGAGAGCT -3' rG4seq-K ------------------------**---------	TRA2B|ENSG00000136527.19	ENST00000259043.11;ENST00000382191.4;ENST00000414862.5;ENST00000453386.7;ENST00000456380.5;ENST00000463328.5;ENST00000466832.5;ENST00000487615.5;ENST00000492417.5	3UTR;CDS	106	104	50	24		107	98	42	20
chr4	1212091	1212092	longloop	-	chr4:1212092-1212126:-	FALSE	5'- GGGCTGTCAGGAGGCGGGAGGGGGCAGCGCTGGGCCTCGTGTCG -3' rG4seq-K ----------------------------------*---------	CTBP1|ENSG00000159692.16	ENST00000290921.10;ENST00000382952.8;ENST00000503594.5;ENST00000514596.1	3UTR	38	16	8	0		40	17	11	0
chr4	10098994	10098995	two-quartet	-	chr4:10098995-10099022:-	FALSE	5'- GGATCGCCGTGGTCGGGGAAGGAAGGGAGAAGTTTGG -3' rG4seq-K ---------------------------*---------	WDR1|ENSG00000071127.17	ENST00000264785.11;ENST00000382451.6;ENST00000382452.6;ENST00000499869.7;ENST00000502702.5;ENST00000505851.5;ENST00000508079.1;ENST00000514319.5;ENST00000515018.1	CDS	29	23	6	1		23	18	7	1
chr4	77075475	77075476	bulges	-	chr4:77075474-77075502:-	FALSE	5'- GGAGGAGGAGGAGGAGGAAGAGGAGGAGAAGAATGTTT -3' rG4seq-K --------------------------*-----------	CCNI|ENSG00000118816.11	ENST00000237654.9;ENST00000507788.2;ENST00000511943.5;ENST00000515790.1	5UTR;CDS	79	65	16	3		34	29	12	3
chr4	82427200	82427201	bulges	-	chr4:82427202-82427235:-	FALSE	5'- GGTGCTGCAGCTGGTGGACGAGGTGGTACGAGGGGTCGTGGCC -3' rG4seq-K ----------------------------------*--------	HNRNPDL|ENSG00000152795.18	ENST00000295470.10;ENST00000349655.8;ENST00000502762.4;ENST00000507721.5;ENST00000514511.1;ENST00000602300.5;ENST00000614627.4;ENST00000621267.4;ENST00000630114.2;ENST00000630827.1	3UTR;CDS	20	13	9	0		22	13	6	0
chr5	1318045	1318048	potential G-quadruplex & G>=40%	-	chr5:1318045-1318105:-	FALSE	5'- TCCGGGGTTCGGCCATGTCCTCACGCGGGCAGGGGTGGGAGCCCTCACAGGCAAGGGGGCTGTTGGATTT -3' rG4seq-K ---------------------------------------------------------***----------	CLPTM1L|ENSG00000049656.14	ENST00000320895.10;ENST00000503042.5;ENST00000507807.3;ENST00000630539.1	3UTR	82	27	27	0		60	24	18	0
chr5	43290202	43290204	two-quartet	-	chr5:43290203-43290226:-	FALSE	5'- GGAAGGGAAGAATAGGGGCAGGGCATTATTAGG -3' rG4seq-K ----------------------**---------	HMGCS1|ENSG00000112972.15	ENST00000325110.11;ENST00000433297.2	3UTR	97	49	73	4		92	57	35	5
chr5	43291044	43291046	longloop	-	chr5:43291045-43291089:-	FALSE	5'- GGGGTGGGGGTATGGGAACAGTTGGAGGAATGGGATATCTGGGGATAATTTTAA -3' rG4seq-K -------------------------------------------**---------	HMGCS1|ENSG00000112972.15	ENST00000325110.11;ENST00000433297.2	3UTR	259	96	61	4		199	73	26	0
chr5	43291080	43291081	canonical/G3L1-7	-	chr5:43291079-43291104:-	FALSE	5'- GGGTGGGGTGGGCATGGGGTGGGGGTATGGGAACA -3' rG4seq-K -----------------------*-----------	HMGCS1|ENSG00000112972.15	ENST00000325110.11;ENST00000433297.2	3UTR	69	60	45	28		70	56	33	18
chr5	58454223	58454224	bulges	-	chr5:58454221-58454242:-	FALSE	5'- GGGGAGGGAGAAGGGAGGAAGCTCCCATGTT -3' rG4seq-K ------------------*------------	PLK2|ENSG00000145632.15	ENST00000274289.8;ENST00000502671.5;ENST00000617412.1	3UTR	23	15	12	0		22	18	6	0
chr5	58459086	58459087	two-quartet	-	chr5:58459689-58459707:-,chr5:58459087-58459092:-	TRUE	5'- GGCAAAGTGCTGGGAAAGGGTGGCTTTGCAAAA -3' rG4seq-K -----------------------*---------	PLK2|ENSG00000145632.15	ENST00000274289.8;ENST00000504196.1;ENST00000508300.1;ENST00000514306.1;ENST00000515415.5;ENST00000617412.1	CDS	21	12	14	0		23	10	9	0
chr5	58459972	58459973	bulges	-	chr5:58459973-58459997:-	FALSE	5'- GGGGGTGGCAGCGGGCAGTGCGGGGCGGCAAGGC -3' rG4seq-K ------------------------*---------	PLK2|ENSG00000145632.15	ENST00000274289.8;ENST00000504196.1;ENST00000617412.1	5UTR	50	37	7	1		23	17	6	0
chr5	134225867	134225868	two-quartet	-	chr5:134225865-134225892:-	FALSE	5'- GGAGCGGCAGCCGGCTGGGGCGGGTGGCATCATGGAC -3' rG4seq-K ------------------------*------------	ENSG00000272772|ENSG00000272772.1;ENSG00000273345|ENSG00000273345.5;PPP2CA|ENSG00000113575.10	ENST00000231504.5;ENST00000481195.6;ENST00000518409.1;ENST00000519718.1;ENST00000520515.5	5UTR;non_coding	42	31	15	1		32	17	17	1
chr5	137752763	137752764	canonical/G3L1-7	-	chr5:137752761-137752783:-	FALSE	5'- GGGTGGGGGTTGGGGTGGGGGGTAGTTTACTT -3' rG4seq-K -------------------*------------	HNRNPA0|ENSG00000177733.7	ENST00000314940.7	3UTR	56	51	29	18		61	55	22	14
chr5	137752812	137752813	bulges	-	chr5:137752813-137752834:-	FALSE	5'- GTTTTTTGGGGGGAGGGAGGGAGTGAACTTG -3' rG4seq-K ---------------------*---------	HNRNPA0|ENSG00000177733.7	ENST00000314940.7	3UTR	75	69	12	4		62	52	13	3
chr5	137753160	137753161	bulges	-	chr5:137753161-137753195:-	FALSE	5'- GAGGCGGCTATGGCGGTGGGGGTGGCTATGGAGGCAGCTCCTTC -3' rG4seq-K ----------------------------------*---------	HNRNPA0|ENSG00000177733.7	ENST00000314940.7	CDS	52	20	19	2		50	17	12	0
chr5	137753232	137753233	bulges	-	chr5:137753233-137753258:-	FALSE	5'- GCGGCGGCGGCGGCGGCGGTGGAGGCAGTAGCTGG -3' rG4seq-K -------------------------*---------	HNRNPA0|ENSG00000177733.7	ENST00000314940.7	CDS	69	57	21	6		46	34	9	0
chr5	137754313	137754314	bulges	-	chr5:137754314-137754339:-	FALSE	5'- GGAGCGGAGGTGGCGGCGGCGGCGGTAGCGGTGGC -3' rG4seq-K -------------------------*---------	HNRNPA0|ENSG00000177733.7	ENST00000314940.7	5UTR	35	20	10	0		23	14	10	1
chr5	149550996	149550998	potential G-quadruplex & G>=40%	-	chr5:149550996-149551056:-	FALSE	5'- CGTAGCCTTGCCTAGTGTAGGAGCCCCGAGGCCTCCGTCCTCTTCCCAGAGGTGTCGGGGCTTGGCCCCA -3' rG4seq-K ----------------------------------------------------------**----------	CSNK1A1|ENSG00000113712.19	ENST00000261798.10;ENST00000377843.8;ENST00000515748.2;ENST00000515768.6;ENST00000523203.5;ENST00000606719.6;ENST00000657001.1;ENST00000657462.1;ENST00000657706.1;ENST00000661952.1;ENST00000670598.1	5UTR	98	69	50	14		84	55	38	6
chr5	151101319	151101321	canonical/G3L1-7	-	chr5:151101320-151101351:-	FALSE	5'- GGGCAGGGGTGGGGGGAGGGGTTGGGTTGGGCTCTTATCTT -3' rG4seq-K ------------------------------**---------	ANXA6|ENSG00000197043.14	ENST00000354546.10;ENST00000377751.9;ENST00000521512.5;ENST00000522664.5;ENST00000523714.5	3UTR	32	12	14	0		39	16	14	0
chr5	179614881	179614882	bulges	-	chr5:179614882-179614904:-	FALSE	5'- GGGCGTGAACGGAATGGGAGGGTTGTCTAGCA -3' rG4seq-K ----------------------*---------	HNRNPH1|ENSG00000169045.17	ENST00000329433.10;ENST00000356731.9;ENST00000393432.8;ENST00000442819.6;ENST00000502632.5;ENST00000502904.5;ENST00000510411.5;ENST00000510678.5;ENST00000514332.5;ENST00000515481.5;ENST00000519033.5;ENST00000521720.5;ENST00000523449.5;ENST00000524179.1	3UTR;CDS	33	24	25	7		27	16	11	2
chr5	179618049	179618050	bulges	-	chr5:179618144-179618173:-,chr5:179618050-179618060:-	TRUE	5'- GAGGATGAGGCGTGGTGCTTATGGTGGAGGCTATGGAGGCTATGATGAT -3' rG4seq-K ---------------------------------------*---------	HNRNPH1|ENSG00000169045.17	ENST00000329433.10;ENST00000356731.9;ENST00000393432.8;ENST00000442819.6;ENST00000502632.5;ENST00000502904.5;ENST00000503105.5;ENST00000504549.5;ENST00000504779.6;ENST00000510411.5;ENST00000510678.5;ENST00000514332.5;ENST00000514731.5;ENST00000515481.5;ENST00000518548.5;ENST00000519958.5;ENST00000520415.1;ENST00000521173.5;ENST00000523921.1	3UTR;CDS	59	36	14	2		49	35	10	0
chr5	179619340	179619341	two-quartet	-	chr5:179619341-179619370:-	FALSE	5'- GGACTTCCAGGGGAGGAGTACGGGGGAGGCCTTCGTGCA -3' rG4seq-K -----------------------------*---------	HNRNPH1|ENSG00000169045.17	ENST00000329433.10;ENST00000356731.9;ENST00000393432.8;ENST00000442819.6;ENST00000503105.5;ENST00000504348.5;ENST00000504779.6;ENST00000505811.5;ENST00000506721.5;ENST00000508103.5;ENST00000510411.5;ENST00000510431.5;ENST00000510678.5;ENST00000513225.5;ENST00000514332.5;ENST00000514731.5;ENST00000515481.5;ENST00000518548.5;ENST00000519056.5;ENST00000519958.5;ENST00000520415.1;ENST00000521173.5;EN…	CDS	48	28	15	3		34	21	8	0
chr5	180791796	180791797	longloop	-	chr5:180791797-180791828:-	FALSE	5'- GGGGAGGTGCGGGTGCAGTATACGGGCAGGGACAGCTTCAA -3' rG4seq-K -------------------------------*---------	MGAT1|ENSG00000131446.17	ENST00000307826.5;ENST00000333055.8;ENST00000393340.7;ENST00000427865.2;ENST00000446023.6	CDS	19	11	7	0		27	14	6	0
chr6	7910636	7910637	bulges	-	chr6:7910637-7910660:-	FALSE	5'- GGAGGCGGCGGCGGCGGCGGCGGACGGGCCCCC -3' rG4seq-K -----------------------*---------	BLOC1S5-TXNDC5|ENSG00000259040.5;TXNDC5|ENSG00000239264.9	ENST00000379757.9;ENST00000439343.2	CDS;non_coding	24	15	23	0		21	13	10	1
chr6	30602397	30602398	bulges	-	chr6:30602398-30602434:-	FALSE	5'- GGGGGCCCTGGTGGGGGCATGGTTGGAGGTGGTGGGCATCGTCCTC -3' rG4seq-K ------------------------------------*---------	PPP1R10|ENSG00000204569.10	ENST00000376511.7	CDS	13	10	8	0		11	7	6	0
chr6	30743269	30743271	bulges	-	chr6:30743270-30743288:-	FALSE	5'- GGGTTGGGGGTTGGTGGGCTGTCACGGA -3' rG4seq-K -----------------**---------	IER3|ENSG00000137331.12	ENST00000259874.6;ENST00000376377.2	3UTR	211	171	80	20		188	150	34	6
chr6	30743430	30743431	two-quartet	-	chr6:30743431-30743456:-	FALSE	5'- GGCTGGGATGAAGTCTGGTGGTGGGTCGTAAGTTT -3' rG4seq-K -------------------------*---------	IER3|ENSG00000137331.12	ENST00000259874.6;ENST00000376377.2	3UTR	66	42	20	5		48	31	16	1
chr6	30743467	30743469	bulges	-	chr6:30743467-30743500:-	FALSE	5'- GTAGGAGAAGAAATGGGGAGGACTCGGGTGGGGGAGGACGTCC -3' rG4seq-K -------------------------------**----------	IER3|ENSG00000137331.12	ENST00000259874.6;ENST00000376377.2	3UTR	45	35	32	1		40	24	26	0
chr6	31730641	31730642	longloop	-	chr6:31730642-31730677:-	FALSE	5'- GGGGGGCCTGGGTCAGATTTTTATTGTGGGGTGGGATGAGTAGGA -3' rG4seq-K -----------------------------------*---------	CLIC1|ENSG00000213719.8	ENST00000375779.6;ENST00000375780.6;ENST00000375784.7;ENST00000395892.5;ENST00000616760.1	3UTR	154	117	25	8		117	84	15	2
chr6	31736463	31736465	canonical/G3L1-7	-	chr6:31736463-31736491:-	FALSE	5'- GGGTGTGGGGTGCGTTGGGCTGGTGGGGAGGCCTAGTT -3' rG4seq-K --------------------------**----------	CLIC1|ENSG00000213719.8	ENST00000375779.6;ENST00000375780.6;ENST00000375784.7;ENST00000395892.5;ENST00000616760.1	5UTR	80	61	31	3		80	53	16	1
chr6	31954592	31954593	canonical/G3L1-7	-	chr6:31954593-31954614:-	FALSE	5'- GGGAACGGGACAGGGATCGGGAGCGGGATCG -3' rG4seq-K ---------------------*---------	NELFE|ENSG00000204356.14	ENST00000375425.9;ENST00000375429.8;ENST00000436289.6;ENST00000441998.5;ENST00000444811.6;ENST00000454913.5;ENST00000481121.5;ENST00000488426.5;ENST00000492185.5	CDS	11	10	6	0		7	6	6	0
chr6	53497969	53497970	two-quartet	-	chr6:53497970-53497991:-	FALSE	5'- GGCGGCAGGGGTGGGGGGTGGCAATCATTTT -3' rG4seq-K ---------------------*---------	GCLC|ENSG00000001084.13	ENST00000509541.5;ENST00000616923.5;ENST00000650454.1	3UTR	115	81	25	4		74	53	10	2
chr6	53497975	53497976	two-quartet	-	chr6:53497974-53497991:-	FALSE	5'- GGCGGCAGGGGTGGGGGGTGGCAATCA -3' rG4seq-K ---------------*-----------	GCLC|ENSG00000001084.13	ENST00000509541.5;ENST00000616923.5;ENST00000650454.1	3UTR	19	16	13	2		11	11	6	2
chr6	53544652	53544653	bulges	-	chr6:53544653-53544676:-	FALSE	5'- GGAGGAGGAGGAGGAGGAGGAGGGGGCGGCCAT -3' rG4seq-K -----------------------*---------	GCLC|ENSG00000001084.13	ENST00000504525.1;ENST00000505197.1;ENST00000514004.5;ENST00000616923.5;ENST00000650454.1	5UTR	38	22	22	4		24	17	12	2
chr6	85678186	85678187	two-quartet	-	chr6:85678693-85678706:-,chr6:85678187-85678188:-	TRUE	5'- GGGCGGGTGGTAGGAACAATGGCG -3' rG4seq-K --------------*---------	ENSG00000271793|ENSG00000271793.2;SNHG5|ENSG00000203875.13	ENST00000369605.9;ENST00000414002.6;ENST00000420199.6;ENST00000425170.2;ENST00000427501.6;ENST00000428833.6;ENST00000431043.2;ENST00000433843.2;ENST00000435947.6;ENST00000453754.5;ENST00000587692.6;ENST00000589187.5;ENST00000622963.4;ENST00000623001.4;ENST00000623163.4;ENST00000623267.3;ENST00000623650.4;ENST00000623901.4;ENST00000623910.4;ENST00000624128.2;ENST00000624295.3;ENST00000625175.3;ENS…	non_coding	21	16	15	2		28	22	10	2
chr6	108260951	108260953	bulges	-	chr6:108260950-108260991:-	FALSE	5'- GCGGCGGCGGCGGCGGCTGAACGCGGAGGGGGCGGAGGGAGCCCGCGGCGG -3' rG4seq-K --------------------------------------**-----------	SNX3|ENSG00000112335.15	ENST00000230085.13;ENST00000349379.5;ENST00000368979.6;ENST00000426155.6	5UTR	48	31	27	4		39	19	20	1
chr6	130839557	130839558	bulges	-	chr6:130839556-130839583:-	FALSE	5'- GGAGAGGGGGAGGGGGCTGTGGTGGTGTTCTGTTGGT -3' rG4seq-K -------------------------*-----------	EPB41L2|ENSG00000079819.19	ENST00000337057.8;ENST00000368128.6;ENST00000392427.7;ENST00000445890.6;ENST00000452150.6;ENST00000527411.5;ENST00000528282.5;ENST00000530481.5;ENST00000530757.5;ENST00000531410.5;ENST00000628542.2	3UTR	45	32	7	2		27	16	6	0
chr6	158766079	158766080	bulges	-	chr6:158766078-158766101:-	FALSE	5'- GTGGCAGGAGGGCAGTGGTGGAGCTGGACCTGC -3' rG4seq-K ---------------------*-----------	EZR|ENSG00000092820.19	ENST00000337147.11;ENST00000367075.4	3UTR	44	25	28	3		39	21	16	3
chr6	158766082	158766083	two-quartet	-	chr6:158766083-158766099:-	FALSE	5'- GGCAGGAGGGCAGTGGTGGAGCTGGA -3' rG4seq-K ----------------*---------	EZR|ENSG00000092820.19	ENST00000337147.11;ENST00000367075.4	3UTR	20	8	24	0		21	8	10	0
chr6	158769889	158769891	two-quartet	-	chr6:158769890-158769910:-	FALSE	5'- GGAGGAGGAGAGGAAGCGGGCACAGGAGGA -3' rG4seq-K -------------------**---------	EZR|ENSG00000092820.19	ENST00000337147.11;ENST00000367075.4	CDS	42	23	57	5		85	37	37	1
chr6	158818193	158818195	bulges	-	chr6:158818192-158818227:-	FALSE	5'- GGCGCGGCAGGAGGACGAGGCAGGGCGGGCGGGCGCTCTAAGGGT -3' rG4seq-K --------------------------------**-----------	EZR|ENSG00000092820.19	ENST00000337147.11;ENST00000367075.4;ENST00000476189.1	5UTR	147	130	50	3		107	96	20	0
chr7	6059025	6059026	bulges	-	chr7:6059025-6059047:-	FALSE	5'- GAGGAGGGCGACGGGGCTGGGGCTGTGGCTGC -3' rG4seq-K ---------------------*----------	EIF2AK1|ENSG00000086232.13	ENST00000199389.11;ENST00000431744.5;ENST00000446699.1;ENST00000461493.1;ENST00000463213.5	CDS	16	11	6	0		25	17	7	1
chr7	26192526	26192527	bulges	-	chr7:26192525-26192556:-	FALSE	5'- GTGGAGGAAGTGGGGGTTATGGTGGGAGGAGCCGATACTGA -3' rG4seq-K -----------------------------*-----------	HNRNPA2B1|ENSG00000122566.22	ENST00000354667.8;ENST00000356674.8;ENST00000360787.8;ENST00000463181.5;ENST00000476233.2;ENST00000490912.6;ENST00000608362.2;ENST00000618183.5;ENST00000676497.1;ENST00000676524.1;ENST00000676746.1;ENST00000676749.1;ENST00000676903.1;ENST00000676932.1;ENST00000677037.1;ENST00000677075.1;ENST00000677321.1;ENST00000677339.1;ENST00000677396.1;ENST00000677571.1;ENST00000677574.1;ENST00000677631.1;ENS…	3UTR;CDS	176	54	54	1		159	46	34	1
chr7	26192529	26192530	bulges	-	chr7:26192531-26192563:-	FALSE	5'- GGAGGCAGTGGAGGAAGTGGGGGTTATGGTGGGAGGAGCCGA -3' rG4seq-K ---------------------------------*--------	HNRNPA2B1|ENSG00000122566.22	ENST00000354667.8;ENST00000356674.8;ENST00000360787.8;ENST00000463181.5;ENST00000476233.2;ENST00000490912.6;ENST00000608362.2;ENST00000618183.5;ENST00000676497.1;ENST00000676524.1;ENST00000676746.1;ENST00000676749.1;ENST00000676903.1;ENST00000676932.1;ENST00000677037.1;ENST00000677075.1;ENST00000677321.1;ENST00000677339.1;ENST00000677396.1;ENST00000677571.1;ENST00000677574.1;ENST00000677631.1;ENS…	3UTR;CDS	118	62	50	4		107	51	32	3
chr7	26193632	26193633	bulges	-	chr7:26193633-26193665:-	FALSE	5'- GGAGGAGGAAGAGGAGGATATGGTGGTGGAGGACCTGGATAT -3' rG4seq-K --------------------------------*---------	HNRNPA2B1|ENSG00000122566.22	ENST00000354667.8;ENST00000356674.8;ENST00000360787.8;ENST00000463181.5;ENST00000476233.2;ENST00000490912.6;ENST00000608362.2;ENST00000618183.5;ENST00000676497.1;ENST00000676524.1;ENST00000676746.1;ENST00000676749.1;ENST00000676903.1;ENST00000676932.1;ENST00000677037.1;ENST00000677075.1;ENST00000677321.1;ENST00000677339.1;ENST00000677396.1;ENST00000677571.1;ENST00000677574.1;ENST00000677631.1;ENS…	3UTR;CDS	86	51	45	7		76	54	16	2
chr7	26193635	26193636	bulges	-	chr7:26193633-26193665:-	FALSE	5'- GGAGGAGGAAGAGGAGGATATGGTGGTGGAGGACCTGGATAT -3' rG4seq-K -----------------------------*------------	HNRNPA2B1|ENSG00000122566.22	ENST00000354667.8;ENST00000356674.8;ENST00000360787.8;ENST00000463181.5;ENST00000476233.2;ENST00000490912.6;ENST00000608362.2;ENST00000618183.5;ENST00000676497.1;ENST00000676524.1;ENST00000676746.1;ENST00000676749.1;ENST00000676903.1;ENST00000676932.1;ENST00000677037.1;ENST00000677075.1;ENST00000677321.1;ENST00000677339.1;ENST00000677396.1;ENST00000677571.1;ENST00000677574.1;ENST00000677631.1;ENS…	3UTR;CDS	34	20	40	2		20	11	15	1
chr7	26193677	26193678	two-quartet	-	chr7:26195846-26195850:-,chr7:26193678-26193694:-	TRUE	5'- GGAGGTGGCAATTTTGGAGGTAGCCCCGGT -3' rG4seq-K --------------------*---------	HNRNPA2B1|ENSG00000122566.22	ENST00000354667.8;ENST00000356674.8;ENST00000360787.8;ENST00000463181.5;ENST00000476233.2;ENST00000490912.6;ENST00000495810.2;ENST00000608362.2;ENST00000618183.5;ENST00000676497.1;ENST00000676524.1;ENST00000676746.1;ENST00000676749.1;ENST00000676903.1;ENST00000676932.1;ENST00000677037.1;ENST00000677075.1;ENST00000677321.1;ENST00000677339.1;ENST00000677396.1;ENST00000677571.1;ENST00000677574.1;ENS…	3UTR;CDS	81	29	25	2		63	25	12	0
chr7	26196443	26196444	two-quartet	-	chr7:26196444-26196473:-	FALSE	5'- GGCTTTGGGGATTCACGTGGTGGCGGTGGAAATTTCGGA -3' rG4seq-K -----------------------------*---------	HNRNPA2B1|ENSG00000122566.22	ENST00000354667.8;ENST00000356674.8;ENST00000360787.8;ENST00000463181.5;ENST00000476233.2;ENST00000490912.6;ENST00000495810.2;ENST00000608362.2;ENST00000618183.5;ENST00000676497.1;ENST00000676524.1;ENST00000676746.1;ENST00000676749.1;ENST00000676903.1;ENST00000676932.1;ENST00000677037.1;ENST00000677075.1;ENST00000677321.1;ENST00000677339.1;ENST00000677396.1;ENST00000677571.1;ENST00000677574.1;ENS…	3UTR;CDS	68	29	36	3		68	31	20	2
chr7	29922610	29922611	longloop	-	chr7:29922611-29922644:-	FALSE	5'- GGGTAGCTGCACTGGGCATGGGGTGGTGGTGGGAGCTTACCGC -3' rG4seq-K ---------------------------------*---------	SCRN1|ENSG00000136193.17	ENST00000242059.10;ENST00000426154.5	3UTR	31	28	12	5		20	17	7	2
chr7	76327469	76327470	bulges	-	chr7:76327470-76327495:-	FALSE	5'- GGGCTGAAAACGGAGAGGGAATGGGAGACTTGATA -3' rG4seq-K -------------------------*---------	YWHAG|ENSG00000170027.7	ENST00000307630.5	3UTR	48	33	16	1		22	16	8	1
chr7	76327662	76327663	canonical/G3L1-7	-	chr7:76327663-76327689:-	FALSE	5'- GGGGGGGGAGGGGGGGGGGGGCAGGGTAGGTGGGGC -3' rG4seq-K --------------------------*---------	YWHAG|ENSG00000170027.7	ENST00000307630.5	3UTR	26	23	13	2		11	10	13	1
chr7	76329488	76329490	canonical/G3L1-7	-	chr7:76329489-76329509:-	FALSE	5'- GGGGGTCGGGTGGGGGAGGGAAAGGGAGGG -3' rG4seq-K -------------------**---------	YWHAG|ENSG00000170027.7	ENST00000307630.5	3UTR	46	37	33	7		27	24	15	4
chr7	135928482	135928483	canonical/G3L1-7	-	chr7:135928483-135928501:-	FALSE	5'- GGGGAGGGTGGGTTAGGGACTGATACTC -3' rG4seq-K ------------------*---------	MTPN|ENSG00000105887.11	ENST00000393085.4	3UTR	44	41	11	6		27	27	7	3
chr7	149005247	149005249	potential G-quadruplex & G>=40%	-	chr7:149005247-149005307:-	FALSE	5'- TGCGGACGAAGAGGACTATGCTGGGGAGGTGAAGGACCTGGGGCTCAGCGAGAGTGGGGAGGATGTCAAT -3' rG4seq-K ----------------------------------------------------------**----------	PDIA4|ENSG00000155660.11	ENST00000286091.9;ENST00000466592.1;ENST00000652332.1	CDS	74	30	61	8		91	44	37	4
chr7	149021080	149021081	potential G-quadruplex & G>=40%	-	chr7:149021080-149021140:-	FALSE	5'- TAACAGAGAAAATGCCATTGAGGATGAAGAGGAGGAGGAGGAGGAAGATGATGATGAGGAAGAAGACGAC -3' rG4seq-K -----------------------------------------------------------*----------	PDIA4|ENSG00000155660.11	ENST00000286091.9;ENST00000413966.1;ENST00000652332.1	CDS	52	18	47	2		50	21	40	2
chr8	143916440	143916441	two-quartet	-	chr8:143916440-143916459:-	FALSE	5'- GGTGGAGGAGGGCACGGGGCTGCGGCTGC -3' rG4seq-K ------------------*----------	PLEC|ENSG00000178209.17	ENST00000322810.8;ENST00000345136.8;ENST00000354589.7;ENST00000354958.6;ENST00000356346.7;ENST00000357649.6;ENST00000398774.6;ENST00000436759.6;ENST00000527096.5;ENST00000527303.2;ENST00000528025.6;ENST00000685198.1;ENST00000687971.1;ENST00000693060.1	CDS	38	33	6	0		43	38	6	1
chr8	143927685	143927686	bulges	-	chr8:143927685-143927717:-	FALSE	5'- GGGATGAGCTGCGGGGGGCACAGGAGGTGGGGGAGCGACTGC -3' rG4seq-K -------------------------------*----------	PLEC|ENSG00000178209.17	ENST00000322810.8;ENST00000345136.8;ENST00000354589.7;ENST00000354958.6;ENST00000356346.7;ENST00000357649.6;ENST00000398774.6;ENST00000436759.6;ENST00000527096.5;ENST00000527303.2;ENST00000528025.6;ENST00000685198.1;ENST00000687971.1;ENST00000693060.1	CDS	8	5	7	0		8	6	8	0
chr8	143932453	143932455	two-quartet	-	chr8:143932454-143932472:-	FALSE	5'- GGAGGAGGAGGAGGTGGGCTTCGACTGG -3' rG4seq-K -----------------**---------	PLEC|ENSG00000178209.17	ENST00000322810.8;ENST00000345136.8;ENST00000354589.7;ENST00000354958.6;ENST00000356346.7;ENST00000357649.6;ENST00000398774.6;ENST00000436759.6;ENST00000527096.5;ENST00000527303.2;ENST00000528025.6;ENST00000685198.1;ENST00000687971.1;ENST00000693060.1	CDS	38	21	52	5		30	21	30	6
chr8	143933292	143933293	bulges	-	chr8:143933293-143933314:-	FALSE	5'- GGGCGGGGGAGGTGGAACGGGACTTGGACAA -3' rG4seq-K ---------------------*---------	PLEC|ENSG00000178209.17	ENST00000322810.8;ENST00000345136.8;ENST00000354589.7;ENST00000354958.6;ENST00000356346.7;ENST00000357649.6;ENST00000398774.6;ENST00000436759.6;ENST00000527096.5;ENST00000527303.2;ENST00000528025.6;ENST00000685198.1;ENST00000687971.1;ENST00000693060.1	CDS	47	35	13	1		36	26	9	1
chr8	144790450	144790451	bulges	-	chr8:144790677-144790687:-,chr8:144790451-144790470:-	TRUE	5'- GGTGATGGAGGTGTGGTGGCTGGAGGTGGCCGAATTGAC -3' rG4seq-K -----------------------------*---------	RPL8|ENSG00000161016.18	ENST00000262584.7;ENST00000394920.6;ENST00000526668.5;ENST00000527914.5;ENST00000528296.5;ENST00000528957.6;ENST00000529163.5;ENST00000529920.5;ENST00000531975.5;ENST00000532702.1;ENST00000533397.5;ENST00000534781.1	3UTR;CDS	99	36	34	2		90	37	34	1
chr9	19378890	19378891	potential G-quadruplex & G>=40%	-	chr9:19378890-19378950:-	FALSE	5'- GTAAATGTGTCATTCATTGTATGCTCTTGCAGGGTTATGTGGTCCGAATCAGTGGTGGGAACGACAAACA -3' rG4seq-K -----------------------------------------------------------*----------	RPS6|ENSG00000137154.13	ENST00000315377.4;ENST00000380381.3;ENST00000380384.5;ENST00000380394.9	3UTR;CDS	79	32	80	8		78	41	38	4
chr9	35057028	35057030	longloop	-	chr9:35057029-35057066:-	FALSE	5'- GGGGGTGGGGGCGCTTGCCCAGGAGAGGGACCAGGGGTGCGCCCACA -3' rG4seq-K ------------------------------------**---------	VCP|ENSG00000165280.18	ENST00000358901.11;ENST00000417448.2;ENST00000448530.6;ENST00000479300.2;ENST00000493886.5;ENST00000676836.2;ENST00000677257.1;ENST00000678018.1;ENST00000678465.1;ENST00000678650.1;ENST00000679204.2;ENST00000679599.1;ENST00000679647.1;ENST00000679800.1;ENST00000679862.1;ENST00000679902.1;ENST00000680916.1;ENST00000681335.1;ENST00000681537.1;ENST00000681690.1	3UTR;CDS	50	18	40	2		68	31	18	1
chr9	125236385	125236386	bulges	-	chr9:125236386-125236411:-	FALSE	5'- GGGTGGGGGGGAGAAGAAGAATTGGCCATCTTAAA -3' rG4seq-K -------------------------*---------	HSPA5|ENSG00000044574.9	ENST00000324460.7;ENST00000679355.1;ENST00000679475.1;ENST00000680257.1;ENST00000680272.1;ENST00000680494.1;ENST00000680640.1;ENST00000681045.1;ENST00000681424.1;ENST00000681544.1;ENST00000681675.1;ENST00000681774.1	3UTR	74	36	56	1		59	28	25	0
chr9	125239254	125239256	potential G-quadruplex & G>=40%	-	chr9:125239254-125239314:-	FALSE	5'- CTTATGGCCTGGATAAGAGGGAGGGGGAGAAGAACATCCTGGTGTTTGACCTGGGTGGCGGAACCTTCGA -3' rG4seq-K ----------------------------------------------------------**----------	HSPA5|ENSG00000044574.9	ENST00000324460.7;ENST00000679355.1;ENST00000679475.1;ENST00000680032.1;ENST00000680234.1;ENST00000680257.1;ENST00000680272.1;ENST00000680494.1;ENST00000680640.1;ENST00000681045.1;ENST00000681424.1;ENST00000681540.1;ENST00000681544.1;ENST00000681675.1;ENST00000681774.1	CDS	170	62	132	13		135	43	67	3
chr9	133361622	133361623	bulges	-	chr9:133361623-133361643:-	FALSE	5'- GGGAGGGGAGGATAAGTGGGATCTACCAAT -3' rG4seq-K --------------------*---------	SURF4|ENSG00000148248.14	ENST00000371989.8;ENST00000545297.5;ENST00000613129.4;ENST00000618229.4	3UTR	113	89	18	8		81	61	7	2
chr9	133361635	133361636	potential G-quadruplex & G>=40%	-	chr9:133361635-133361695:-	FALSE	5'- TTTCTCCTGGCCCTGGGTGGGCTAGGGCCTGATTCGGGAAGATGCCTTTGCAGGGAGGGGAGGATAAGTG -3' rG4seq-K -----------------------------------------------------------*----------	SURF4|ENSG00000148248.14	ENST00000371989.8;ENST00000545297.5;ENST00000613129.4;ENST00000618229.4	3UTR	11	5	14	0		12	7	6	0
chrM	14326	14327	two-quartet	-	chrM:14327-14343:-	FALSE	5'- GGGGTGGTGGTTGTGGTAAACTTTAA -3' rG4seq-K ----------------*---------	MT-ND6|ENSG00000198695.2	ENST00000361681.2	CDS	84	49	16	2		58	32	10	1
chrX	154348595	154348597	canonical/G3L1-7	-	chrX:154348595-154348616:-	FALSE	5'- GGGAGGGGTGAGGGATGGGGGTCCTGTACAC -3' rG4seq-K -------------------**----------	FLNA|ENSG00000196924.19	ENST00000360319.9;ENST00000369850.10;ENST00000369856.8;ENST00000420627.5;ENST00000422373.6;ENST00000498411.1;ENST00000610817.5;ENST00000673639.2;ENST00000676696.1;ENST00000678304.1	3UTR	240	143	64	14		200	117	40	7
chrX	154360554	154360555	bulges	-	chrX:154360552-154360575:-	FALSE	5'- GGGCCGGGGCTGCAGGGAGGCAGTGCGGGCTCC -3' rG4seq-K --------------------*------------	FLNA|ENSG00000196924.19	ENST00000360319.9;ENST00000369850.10;ENST00000369856.8;ENST00000420627.5;ENST00000422373.6;ENST00000610817.5;ENST00000673639.2;ENST00000676696.1	3UTR;CDS	26	15	16	1		14	8	12	0
chrX	154364881	154364882	bulges	-	chrX:154364880-154364910:-	FALSE	5'- GGGCCTGGGGCCCTGGGCTGGAGGGCGGCGTCGTTGGCAA -3' rG4seq-K ----------------------------*-----------	FLNA|ENSG00000196924.19	ENST00000360319.9;ENST00000369850.10;ENST00000369856.8;ENST00000420627.5;ENST00000422373.6;ENST00000465144.1;ENST00000610817.5;ENST00000673639.2;ENST00000676696.1	3UTR;CDS	55	39	23	2		51	39	13	2
chrX	154364884	154364885	canonical/G3L1-7	-	chrX:154364885-154364910:-	FALSE	5'- GGGCCTGGGGCCCTGGGCTGGAGGGCGGCGTCGTT -3' rG4seq-K -------------------------*---------	FLNA|ENSG00000196924.19	ENST00000360319.9;ENST00000369850.10;ENST00000369856.8;ENST00000420627.5;ENST00000422373.6;ENST00000465144.1;ENST00000610817.5;ENST00000673639.2;ENST00000676696.1	3UTR;CDS	16	6	20	0		9	5	13	0
