# Supplementary material
Source: HighWire-hosted journal article supplement (doi:10.1101/rna.080321.124)
Supplement: Supplemental_Table_S9.xlsx [file Supplemental_Table_S9.xlsx]

## Sheet: cx5461_DP-result
In vivo cx5461											Biological rep1					Biological rep2
chromosome	start	end	rG4_structural_class	strand	rG4_intervals	splicing	sequence_diagram	gene_names	coding_regions	transcript_ids	BR1_K+ coverage	BR1_K+ stop	BR1_Li+ coverage	BR1_Li+ stop		BR2_K+ coverage	BR2_K+ stop	BR2_Li+ coverage	BR2_Li+ stop
chr11	65504292	65504294	canonical/G3L1-7	+	chr11:65504271-65504293:+	FALSE	5'- GGGATGGGAGGAGGGGGTGGGGCTTACTTGTT -3' rG4seq-K ---------------------**---------	MALAT1|ENSG00000251562.9	ENST00000534336.1;ENST00000612781.1;ENST00000616527.4;ENST00000618132.1;ENST00000619449.2;ENST00000620465.4	non_coding	245	29	214	16		335	44	284	20
chr11	65505157	65505159	bulges	+	chr11:65505131-65505160:+	FALSE	5'- GGCGTGGGGGTGGAGGGGTGAGGTGGGCGCTAAGCCTTT -3' rG4seq-K --------------------------**-----------	MALAT1|ENSG00000251562.9	ENST00000534336.1;ENST00000610851.1;ENST00000618227.1;ENST00000619449.2	non_coding	148	16	143	6		219	17	259	10
chr22	21644214	21644216	bulges	+	chr22:21644179-21644217:+	FALSE	5'- GTGGATGGATGGGTGGATGGAGGGTGGCAGGTGGGGCGTCTGCAGGGC -3' rG4seq-K -----------------------------------**-----------	SDF2L1|ENSG00000128228.5	ENST00000248958.5	3UTR	55	11	41	3		76	9	84	5
chr5	177595738	177595740	bulges	+	chr5:177595711-177595740:+	FALSE	5'- GAGGCTGCTGTTGGGGGTGGGGGGAGGGGAATGGGCAGG -3' rG4seq-K ---------------------------**----------	TMED9|ENSG00000184840.12	ENST00000332598.7	3UTR	17	6	32	3		41	16	38	9
chr5	179837961	179837962	potential G-quadruplex & G>=40%	+	chr5:179837902-179837962:+	FALSE	5'- CATGCCCTCCATGTGTAAGAACAATGCCAGGGCCCAGGAGGACCGCCTGCCCTGCCTGGGCCTTGGCTGG -3' rG4seq-K -----------------------------------------------------------*----------	SQSTM1|ENSG00000161011.20	ENST00000389805.9	3UTR	86	32	73	11		134	61	110	30
chr7	73832105	73832107	bulges	+	chr7:73832087-73832109:+	FALSE	5'- GGTGTGGTGGTGGAGTGGGGAGCTGGCTTCTG -3' rG4seq-K ------------------**------------	CLDN4|ENSG00000189143.10	ENST00000340958.4;ENST00000431918.1;ENST00000435050.1	3UTR	95	15	86	1		117	13	82	0
chr7	73832398	73832401	bulges	+	chr7:73832380-73832401:+	FALSE	5'- GGGCAGTGGTGGGGGAGGGGGCCAGAGAGGC -3' rG4seq-K ------------------***----------	CLDN4|ENSG00000189143.10	ENST00000340958.4;ENST00000431918.1;ENST00000435050.1	3UTR	140	18	101	7		202	30	155	14
chr7	74196196	74196198	two-quartet	+	chr7:74196171-74196196:+	FALSE	5'- GGCGCTTTGGGGGTGGAGGGGGTGGTGCTGGTGCT -3' rG4seq-K -------------------------**--------	EIF4H|ENSG00000106682.16	ENST00000265753.13;ENST00000353999.6;ENST00000495187.2;ENST00000677570.1;ENST00000677681.1;ENST00000677998.1;ENST00000678438.1;ENST00000678815.1;ENST00000679161.1;ENST00000679266.1;ENST00000679287.1	3UTR	24	8	21	1		36	5	48	2
chr1	8012959	8012961	bulges	-	chr1:8012960-8012984:-	FALSE	5'- GATGGTGGGGAGGGGAGGATGGGGAAGCTTTTTA -3' rG4seq-K -----------------------**---------	ERRFI1|ENSG00000116285.13	ENST00000377482.10;ENST00000474874.5	3UTR	52	12	59	4		94	15	59	2
chr1	20652328	20652329	two-quartet	-	chr1:20652329-20652351:-	FALSE	5'- GGAGACGGGGCAAGGAGGGGGGTTATTAGGAT -3' rG4seq-K ----------------------*---------	DDOST|ENSG00000244038.11	ENST00000415136.6;ENST00000602624.7	3UTR	31	9	16	0		26	6	23	2
chr1	153614368	153614371	canonical/G3L1-7	-	chr1:153614369-153614396:-	FALSE	5'- GGGGAGGAGGGAGAGCAGGGTTGGGGGAGAGGCTGAG -3' rG4seq-K -------------------------***---------	S100A14|ENSG00000189334.9	ENST00000344616.4;ENST00000368701.5;ENST00000368702.5;ENST00000476873.5	3UTR	90	11	45	3		159	14	99	5
chr17	7260209	7260211	canonical/G3L1-7	-	chr17:7260210-7260228:-	FALSE	5'- GGGTTGGGGGTGGGGGGGTGCCGTTGGT -3' rG4seq-K -----------------**---------	CLDN7|ENSG00000181885.18;ENSG00000262302|ENSG00000262302.1	ENST00000360325.11;ENST00000397317.8;ENST00000538261.7;ENST00000577138.1	3UTR;non_coding	86	6	45	1		98	20	89	4
chr19	3976289	3976291	canonical/G3L1-7	-	chr19:3976290-3976312:-	FALSE	5'- GGGGAGGGGGAGGCGGGATGGGACACCCAACA -3' rG4seq-K ---------------------**---------	EEF2|ENSG00000167658.16	ENST00000309311.7;ENST00000600794.1	3UTR;CDS	156	19	115	7		264	27	212	11
chr19	3982371	3982372	longloop	-	chr19:3982372-3982401:-	FALSE	5'- GGGCTTTGGGTCTGGCCTCCACGGGTGGGCCTTCACCCT -3' rG4seq-K -----------------------------*---------	EEF2|ENSG00000167658.16	ENST00000309311.7;ENST00000598436.1	CDS	80	4	76	1		97	3	123	0
chr5	43291080	43291081	canonical/G3L1-7	-	chr5:43291079-43291104:-	FALSE	5'- GGGTGGGGTGGGCATGGGGTGGGGGTATGGGAACA -3' rG4seq-K -----------------------*-----------	HMGCS1|ENSG00000112972.15	ENST00000325110.11;ENST00000433297.2	3UTR	18	8	18	4		27	9	21	4
chrX	154348595	154348597	canonical/G3L1-7	-	chrX:154348595-154348616:-	FALSE	5'- GGGAGGGGTGAGGGATGGGGGTCCTGTACAC -3' rG4seq-K -------------------**----------	FLNA|ENSG00000196924.19	ENST00000360319.9;ENST00000369850.10;ENST00000369856.8;ENST00000420627.5;ENST00000422373.6;ENST00000498411.1;ENST00000610817.5;ENST00000673639.2;ENST00000676696.1;ENST00000678304.1	3UTR	44	5	50	1		61	7	54	3
