# Supplementary material
Source: HighWire-hosted journal article supplement (doi:10.1101/rna.080321.124)
Supplement: Supplemental_Table_S10.xlsx [file Supplemental_Table_S10.xlsx]

## Sheet: Sheet1
PDS DEG					phenDC3 DEG						remdesivir DEG
IL32	ENSG00000008517.19				REXO5	ENSG00000005189.20					MSL3	ENSG00000005302.19
TRAF3IP3	ENSG00000009790.15				CACNA1G	ENSG00000006283.18					IL32	ENSG00000008517.19
HHATL	ENSG00000010282.15				PAX6	ENSG00000007372.25					FAS	ENSG00000026103.23
YAF2	ENSG00000015153.15				IL32	ENSG00000008517.19					ELN	ENSG00000049540.19
WWTR1	ENSG00000018408.15				HSF2	ENSG00000025156.13					DKK3	ENSG00000050165.19
FAS	ENSG00000026103.23				FAS	ENSG00000026103.23					ITIH4	ENSG00000055955.17
ITIH4	ENSG00000055955.17				LMO3	ENSG00000048540.16					MEF2A	ENSG00000068305.18
SNCAIP	ENSG00000064692.20				DKK3	ENSG00000050165.19					MBNL3	ENSG00000076770.15
CLEC2D	ENSG00000069493.15				LAMC3	ENSG00000050555.19					CEACAM1	ENSG00000079385.23
TBX21	ENSG00000073861.3				MYLK	ENSG00000065534.20					EPDR1	ENSG00000086289.12
IPCEF1	ENSG00000074706.14				MEF2A	ENSG00000068305.18					AAMDC	ENSG00000087884.15
ACTR6	ENSG00000075089.10				ASNS	ENSG00000070669.17					P2RX6	ENSG00000099957.17
ACER3	ENSG00000078124.13				TUBE1	ENSG00000074935.14					MFNG	ENSG00000100060.18
PMS2P1	ENSG00000078319.11				PLD1	ENSG00000075651.17					LGALS1	ENSG00000100097.12
RRAGB	ENSG00000083750.13				USP33	ENSG00000077254.14					RHBDL1	ENSG00000103269.14
ALG6	ENSG00000088035.18				PUM3	ENSG00000080608.10					RPGRIP1L	ENSG00000103494.16
ARHGAP4	ENSG00000089820.16				P3H2	ENSG00000090530.10					DMXL2	ENSG00000104093.14
PPP2R3C	ENSG00000092020.11				VNN3	ENSG00000093134.15					MAP4K1	ENSG00000104814.13
RHBDL1	ENSG00000103269.14				SH3GLB1	ENSG00000097033.14					CHN2	ENSG00000106069.24
TMC5	ENSG00000103534.17				LGALS1	ENSG00000100097.12					RASSF4	ENSG00000107551.21
GDAP1	ENSG00000104381.14				UPK3A	ENSG00000100373.10					OPRM1	ENSG00000112038.18
FCGRT	ENSG00000104870.13				NFATC4	ENSG00000100968.14					IQCG	ENSG00000114473.14
PRX	ENSG00000105227.16				RHBDL1	ENSG00000103269.14					ABHD14A-ACY1	ENSG00000114786.16
SYNGR4	ENSG00000105467.9				ACSBG1	ENSG00000103740.10					BCL2L14	ENSG00000121380.12
RASIP1	ENSG00000105538.10				FGF21	ENSG00000105550.10					LAX1	ENSG00000122188.13
PDAP1	ENSG00000106244.13				PDE4C	ENSG00000105650.22					RECK	ENSG00000122707.12
AEBP1	ENSG00000106624.11				ETV2	ENSG00000105672.15					H1-3	ENSG00000124575.7
NCS1	ENSG00000107130.10				HPN	ENSG00000105707.15					IRF1	ENSG00000125347.15
RASSF4	ENSG00000107551.21				CFAP69	ENSG00000105792.19					IGFLR1	ENSG00000126246.10
CYP2C18	ENSG00000108242.13				RASA4	ENSG00000105808.19					GFAP	ENSG00000131095.14
ARRDC3	ENSG00000113369.9				RASSF4	ENSG00000107551.21					SH3BGRL	ENSG00000131171.13
RTKN	ENSG00000114993.17				SLC2A9	ENSG00000109667.12					SNAP25	ENSG00000132639.14
PCSK4	ENSG00000115257.15				VWA5A	ENSG00000110002.16					ACY3	ENSG00000132744.8
DPH5	ENSG00000117543.22				GNPTAB	ENSG00000111670.16					IL15RA	ENSG00000134470.21
ARG1	ENSG00000118520.15				OPRM1	ENSG00000112038.18					PLXNC1	ENSG00000136040.9
GORAB	ENSG00000120370.14				MDGA1	ENSG00000112139.17					MYCBPAP	ENSG00000136449.15
HJURP	ENSG00000123485.12				IQCG	ENSG00000114473.14					CARF	ENSG00000138380.18
RTN2	ENSG00000125744.12				PLSCR4	ENSG00000114698.15					SLC38A6	ENSG00000139974.16
SGCE	ENSG00000127990.19				ST3GAL5	ENSG00000115525.18					NEIL1	ENSG00000140398.14
SH3BP4	ENSG00000130147.16				WNT6	ENSG00000115596.4					NR1I3	ENSG00000143257.12
PNCK	ENSG00000130822.16				QPCT	ENSG00000115828.17					PPFIA4	ENSG00000143847.16
SH3BGRL	ENSG00000131171.13				SFPQ	ENSG00000116560.11					PTPN7	ENSG00000143851.16
ZSWIM3	ENSG00000132801.7				PPP4R4	ENSG00000119698.12					CCDC150	ENSG00000144395.18
CHRM3	ENSG00000133019.12				BCL11A	ENSG00000119866.22					ADM	ENSG00000148926.10
TMEM241	ENSG00000134490.14				MTHFD1L	ENSG00000120254.16					FEZ1	ENSG00000149557.14
NEIL1	ENSG00000140398.14				EGR1	ENSG00000120738.8					SETD9	ENSG00000155542.12
NTRK3	ENSG00000140538.16				ZFP30	ENSG00000120784.17					GNA14	ENSG00000156049.7
SLC44A3	ENSG00000143036.17				TRIM6	ENSG00000121236.21					PDE9A	ENSG00000160191.18
CREB3L4	ENSG00000143578.16				LAX1	ENSG00000122188.13					PTH1R	ENSG00000160801.14
MEIS1	ENSG00000143995.20				PI3	ENSG00000124102.5					CCDC78	ENSG00000162004.19
IQGAP2	ENSG00000145703.17				KCNK15	ENSG00000124249.7					CXCL1	ENSG00000163739.5
SLC18B1	ENSG00000146409.12				H1-3	ENSG00000124575.7					IFTAP	ENSG00000166352.18
MRPS28	ENSG00000147586.10				H1-1	ENSG00000124610.5					PIP5KL1	ENSG00000167103.12
KLHL35	ENSG00000149243.17				CDKN1A	ENSG00000124762.14					ANKRD40CL	ENSG00000167117.10
NEK7	ENSG00000151414.15				EREG	ENSG00000124882.4					DNAAF3	ENSG00000167646.14
IFIT5	ENSG00000152778.10				HNRNPR	ENSG00000125944.21					TMC8	ENSG00000167895.15
BCL2L11	ENSG00000153094.24				RAP1B	ENSG00000127314.18					PPIP5K1	ENSG00000168781.23
ZUP1	ENSG00000153975.10				CCDC32	ENSG00000128891.16					VAMP5	ENSG00000168899.5
CEP112	ENSG00000154240.17				FCHO1	ENSG00000130475.15					ZNF274	ENSG00000171606.18
ABCA5	ENSG00000154265.16				RFTN1	ENSG00000131378.14					SMPDL3A	ENSG00000172594.13
FAM167A	ENSG00000154319.16				RAMP1	ENSG00000132329.11					EFEMP2	ENSG00000172638.13
PIK3AP1	ENSG00000155629.15				SERPINF1	ENSG00000132386.11					MTLN	ENSG00000175701.11
RAET1L	ENSG00000155918.8				RRAS2	ENSG00000133818.14					PRSS36	ENSG00000178226.11
CLDN12	ENSG00000157224.16				NREP	ENSG00000134986.14					GRM8	ENSG00000179603.18
KALRN	ENSG00000160145.16				OASL	ENSG00000135114.13					PHC1P1	ENSG00000179899.8
PTH1R	ENSG00000160801.14				ANKRD6	ENSG00000135299.17					ADGRB1	ENSG00000181790.12
SLAMF6	ENSG00000162739.14				CKAP2	ENSG00000136108.15					SATB1	ENSG00000182568.17
PDHA2	ENSG00000163114.6				LRRC49	ENSG00000137821.12					AIFM3	ENSG00000183773.16
FEV	ENSG00000163497.3				APH1B	ENSG00000138613.14					TNFAIP2	ENSG00000185215.11
ZNF691	ENSG00000164011.18				ACVRL1	ENSG00000139567.13					PRKN	ENSG00000185345.24
MFSD8	ENSG00000164073.11				SLC38A6	ENSG00000139974.16					MUC1	ENSG00000185499.17
TMEM71	ENSG00000165071.15				NEIL1	ENSG00000140398.14					ARHGAP30	ENSG00000186517.14
AKR1E2	ENSG00000165568.18				SLC2A5	ENSG00000142583.18					TPK1	ENSG00000196511.15
C11orf65	ENSG00000166323.13				AFF3	ENSG00000144218.21					ZNF846	ENSG00000196605.7
ANKRD40CL	ENSG00000167117.10				ALDH1L1	ENSG00000144908.14					TCF4	ENSG00000196628.20
ZNF558	ENSG00000167785.9				AMT	ENSG00000145020.16					C5AR1	ENSG00000197405.8
DDIT4	ENSG00000168209.6				IQGAP2	ENSG00000145703.17					ATG7	ENSG00000197548.13
H1-4	ENSG00000168298.7				MLIP	ENSG00000146147.15					RN7SKP226	ENSG00000201782.1
ACOX2	ENSG00000168306.13				ST18	ENSG00000147488.12					TRIM31	ENSG00000204616.11
ENHO	ENSG00000168913.7				GBGT1	ENSG00000148288.13					LINC00634	ENSG00000205704.7
PLEKHA2	ENSG00000169499.15				GAS2	ENSG00000148935.12					BBIP1	ENSG00000214413.9
ZNF282	ENSG00000170265.12				KLHL35	ENSG00000149243.17					HDAC4-AS1	ENSG00000222020.4
GTSF1	ENSG00000170627.11				FXYD4	ENSG00000150201.15					SNHG14	ENSG00000224078.15
ZNF296	ENSG00000170684.10				SLC7A11	ENSG00000151012.13					LINC00240	ENSG00000224843.8
FGB	ENSG00000171564.12				CACNA2D4	ENSG00000151062.15					ENSG00000225032	ENSG00000225032.5
CEBPB	ENSG00000172216.6				AKAP6	ENSG00000151320.11					ENSG00000226308	ENSG00000226308.1
FGGY	ENSG00000172456.18				ZNF827	ENSG00000151612.18					LINC00511	ENSG00000227036.9
EFEMP2	ENSG00000172638.13				HSPB8	ENSG00000152137.8					BUB3P1	ENSG00000227968.1
FADS6	ENSG00000172782.13				HNRNPDL	ENSG00000152795.18					FAHD2CP	ENSG00000231584.9
DMXL1	ENSG00000172869.15				CABYR	ENSG00000154040.21					ENSG00000232732	ENSG00000232732.11
SAA1	ENSG00000173432.13				ABCA5	ENSG00000154265.16					CYP1B1-AS1	ENSG00000232973.14
PHYHD1	ENSG00000175287.19				SETD9	ENSG00000155542.12					LINC01191	ENSG00000234199.3
OR4K5	ENSG00000176281.5				MCU	ENSG00000156026.15					GTF3C2-AS1	ENSG00000234945.8
RBIS	ENSG00000176731.12				CDC42SE2	ENSG00000158985.14					SMIM1	ENSG00000235169.11
FLJ40194	ENSG00000177369.10				SPON2	ENSG00000159674.12					KRT18P16	ENSG00000235275.3
ASB8	ENSG00000177981.11				TFF1	ENSG00000160182.3					ENSG00000236013	ENSG00000236013.8
SLC47A2	ENSG00000180638.19				GBAP1	ENSG00000160766.15					ADORA2BP1	ENSG00000236136.1
EDDM3A	ENSG00000181562.5				FBXL13	ENSG00000161040.17					ENSG00000242539	ENSG00000242539.2
SLC2A4	ENSG00000181856.15				ITIH3	ENSG00000162267.13					ARHGEF26-AS1	ENSG00000243069.9
RGS7	ENSG00000182901.18				AXDND1	ENSG00000162779.22					DUBR	ENSG00000243701.8
CSMD1	ENSG00000183117.20				SLC66A3	ENSG00000162976.13					OR2A1-AS1	ENSG00000244479.7
CALHM3	ENSG00000183128.7				DHX57	ENSG00000163214.21					LETR1	ENSG00000248441.8
AIFM3	ENSG00000183773.16				PRKCD	ENSG00000163932.15					SRD5A3-AS1	ENSG00000249700.9
IKZF1	ENSG00000185811.20				ADGRV1	ENSG00000164199.18					TMEM158	ENSG00000249992.2
MYT1L	ENSG00000186487.21				LRTM2	ENSG00000166159.11					LINC00293	ENSG00000253314.7
ZNF286A	ENSG00000187607.16				MSS51	ENSG00000166343.10					PCAT1	ENSG00000253438.5
LCN10	ENSG00000187922.14				DENND2B	ENSG00000166444.19					ENSG00000254990	ENSG00000254990.6
TPRG1	ENSG00000188001.10				DDIT4	ENSG00000168209.6					SERPINA2	ENSG00000258597.3
JAKMIP3	ENSG00000188385.13				TRAPPC11	ENSG00000168538.16					ZMPSTE24-DT	ENSG00000259943.1
MIR3667HG	ENSG00000188511.13				VAMP5	ENSG00000168899.5					ENSG00000263257	ENSG00000263257.3
H2AC11	ENSG00000196787.4				ENHO	ENSG00000168913.7					ENSG00000267026	ENSG00000267026.5
CH17-340M24.3	ENSG00000197180.3				HNRNPA3	ENSG00000170144.21					CTBP2P7	ENSG00000267091.1
COL13A1	ENSG00000197467.17				SPATA24	ENSG00000170469.11					ZNF561-AS1	ENSG00000267106.9
EOLA1	ENSG00000197620.11				WIPF2	ENSG00000171475.14					ENSG00000269981	ENSG00000269981.1
ZNF677	ENSG00000197928.11				TCEA2	ENSG00000171703.17					ENSG00000270935	ENSG00000270935.1
FANK1	ENSG00000203780.12				SCG2	ENSG00000171951.5					MTDHP1	ENSG00000270948.1
PTPN20	ENSG00000204179.11				C1QTNF4	ENSG00000172247.4					ENSG00000273245	ENSG00000273245.1
LST1	ENSG00000204482.11				SMPDL3A	ENSG00000172594.13					ENSG00000273674	ENSG00000273674.6
LINC02138	ENSG00000205015.1				EFEMP2	ENSG00000172638.13					RN7SL2	ENSG00000274012.1
KRTAP4-11	ENSG00000212721.4				CES4A	ENSG00000172824.16					H3C1	ENSG00000275714.2
OR6C69P	ENSG00000213451.2				ERCC4	ENSG00000175595.16					ENSG00000277369	ENSG00000277369.1
RAET1K	ENSG00000218358.3				OR4K5	ENSG00000176281.5					H2AC17	ENSG00000278677.2
CYTOR	ENSG00000222041.12				RUFY1	ENSG00000176783.15					ENSG00000279684	ENSG00000279684.1
RN7SKP123	ENSG00000222664.1				B3GNT8	ENSG00000177191.3					HULC	ENSG00000285219.3
GOLGA2P7	ENSG00000225151.10				MEIS3P1	ENSG00000179277.9					ENSG00000289109	ENSG00000289109.1
LINC01748	ENSG00000226476.7				PHC1P1	ENSG00000179899.8					ENSG00000289244	ENSG00000289244.1
ENSG00000226542	ENSG00000226542.1				C8orf33	ENSG00000182307.14					ENSG00000289469	ENSG00000289469.1
VDAC1P12	ENSG00000227254.1				WT1-AS	ENSG00000183242.13
ENSG00000227733	ENSG00000227733.11				H2AC20	ENSG00000184260.6
ENSG00000230000	ENSG00000230000.3				POU6F1	ENSG00000184271.18
ENSG00000230615	ENSG00000230615.8				PRKD1	ENSG00000184304.17
ENSG00000230623	ENSG00000230623.7				ACTRT3	ENSG00000184378.3
FAM27C	ENSG00000231527.7				ZBTB7C	ENSG00000184828.10
FAHD2CP	ENSG00000231584.9				H2BC13	ENSG00000185130.6
ENSG00000231731	ENSG00000231731.7				LINC00482	ENSG00000185168.6
PRH1	ENSG00000231887.8				ZNF286A	ENSG00000187607.16
DPY19L1P2	ENSG00000231952.3				DHRS4L2	ENSG00000187630.18
FAAHP1	ENSG00000232022.8				NHEJ1	ENSG00000187736.13
MTCYBP15	ENSG00000232154.2				ENSG00000189229	ENSG00000189229.12
IFNWP15	ENSG00000232281.2				TPK1	ENSG00000196511.15
VIPR1-AS1	ENSG00000232354.8				H2AC11	ENSG00000196787.4
ENSG00000232732	ENSG00000232732.11				CH17-340M24.3	ENSG00000197180.3
ENSG00000233223	ENSG00000233223.4				NMB	ENSG00000197696.10
PANTR1	ENSG00000233639.8				LEKR1	ENSG00000197980.14
ENSG00000233775	ENSG00000233775.1				TAFA2	ENSG00000198673.11
SNX18P7	ENSG00000234373.1				MT-CO2	ENSG00000198712.1
YWHAEP5	ENSG00000234645.3				MT-CYB	ENSG00000198727.2
FBXO30-DT	ENSG00000235652.10				MT-ND2	ENSG00000198763.3
RMDN2-AS1	ENSG00000235848.4				MT-ND5	ENSG00000198786.2
INTS6-AS1	ENSG00000236778.8				MT-ND3	ENSG00000198840.2
LINC02814	ENSG00000236975.2				CES1	ENSG00000198848.13
TTN-AS1	ENSG00000237298.10				MT-ND4	ENSG00000198886.2
ZEB2-AS1	ENSG00000238057.10				MT-ND1	ENSG00000198888.2
MTCO1P6	ENSG00000240309.1				MT-CO3	ENSG00000198938.2
MYL6P4	ENSG00000240677.1				RN7SKP226	ENSG00000201782.1
LINC00635	ENSG00000241469.9				BTBD7P1	ENSG00000203414.2
LINC00461	ENSG00000245526.12				ZNF155	ENSG00000204920.11
BDNF-AS	ENSG00000245573.9				MT-RNR1	ENSG00000211459.2
NR2F2-AS1	ENSG00000247809.10				MDP1	ENSG00000213920.9
LINC01091	ENSG00000249464.7				C19orf38	ENSG00000214212.9
SRD5A3-AS1	ENSG00000249700.9				CHROMR	ENSG00000223960.8
ENSG00000249763	ENSG00000249763.1				SNHG14	ENSG00000224078.15
ENSG00000249878	ENSG00000249878.1				PRR29	ENSG00000224383.8
ENSG00000251259	ENSG00000251259.1				LINC00539	ENSG00000224429.9
ENSG00000251364	ENSG00000251364.8				OR11M1P	ENSG00000224709.2
MAILR	ENSG00000253320.7				ENSG00000225313	ENSG00000225313.5
ENSG00000253581	ENSG00000253581.1				ENSG00000227388	ENSG00000227388.3
NIFKP3	ENSG00000256331.1				CERS6-AS1	ENSG00000227617.9
TMC3-AS1	ENSG00000259343.8				C2orf92	ENSG00000228486.11
LINC02253	ENSG00000259485.2				SATB1-AS1	ENSG00000228956.9
LINC01220	ENSG00000259687.3				PROX1-AS1	ENSG00000230461.9
MT1L	ENSG00000260549.3				SETSIP	ENSG00000230667.7
ENSG00000260672	ENSG00000260672.1				LINC02613	ENSG00000231367.6
ENSG00000261096	ENSG00000261096.1				HLA-DPA1	ENSG00000231389.8
PSMD7-DT	ENSG00000261404.7				LNCARSR	ENSG00000233086.8
MAFG-DT	ENSG00000265688.2				LIX1L-AS1	ENSG00000234222.6
ENSG00000266869	ENSG00000266869.2				GTF3C2-AS1	ENSG00000234945.8
ENSG00000267260	ENSG00000267260.3				MLIP-AS1	ENSG00000235050.6
MIR924HG	ENSG00000267374.3				SMIM1	ENSG00000235169.11
SMIM22	ENSG00000267795.6				ENSG00000235724	ENSG00000235724.10
NDUFV2P1	ENSG00000267809.1				ENSG00000235978	ENSG00000235978.7
IKBKG	ENSG00000269335.7				ENSG00000236986	ENSG00000236986.6
ENSG00000270583	ENSG00000270583.1				ENSG00000237126	ENSG00000237126.8
ENSG00000270808	ENSG00000270808.1				ENSG00000239705	ENSG00000239705.2
ARMCX5-GPRASP2	ENSG00000271147.8				ENSG00000239828	ENSG00000239828.8
ENSG00000272088	ENSG00000272088.1				RPL23AP7	ENSG00000240356.6
CASC15	ENSG00000272168.9				ZNF487	ENSG00000243660.12
CD24	ENSG00000272398.6				PPIEL	ENSG00000243970.4
HNRNPD-DT	ENSG00000272677.2				MIATNB	ENSG00000244625.7
ENSG00000272905	ENSG00000272905.1				ENSG00000246090	ENSG00000246090.8
ENSG00000273198	ENSG00000273198.1				GNAO1-DT	ENSG00000246379.8
ENSG00000273654	ENSG00000273654.1				ENSG00000248515	ENSG00000248515.2
ENSG00000273956	ENSG00000273956.1				MTATP6P1	ENSG00000248527.1
H3C8	ENSG00000273983.2				LINC01091	ENSG00000249464.7
ENSG00000274022	ENSG00000274022.1				ENSG00000250347	ENSG00000250347.1
H3C1	ENSG00000275714.2				ENSG00000250519	ENSG00000250519.7
ENSG00000275964	ENSG00000275964.1				MAILR	ENSG00000253320.7
ENSG00000277863	ENSG00000277863.1				PCAT1	ENSG00000253438.5
ENSG00000278668	ENSG00000278668.1				ENSG00000254990	ENSG00000254990.6
H2AC17	ENSG00000278677.2				ENSG00000256913	ENSG00000256913.1
ENSG00000278737	ENSG00000278737.1				LINC02412	ENSG00000258171.2
LINC01727	ENSG00000279082.5				OR11H7	ENSG00000258806.2
ENSG00000279306	ENSG00000279306.1				ZMPSTE24-DT	ENSG00000259943.1
ENSG00000280232	ENSG00000280232.1				ENSG00000261096	ENSG00000261096.1
HULC	ENSG00000285219.3				BEAN1-AS1	ENSG00000261656.6
ENSG00000286816	ENSG00000286816.1				TSPOAP1-AS1	ENSG00000265148.7
ENSG00000286938	ENSG00000286938.1				CTBP2P7	ENSG00000267091.1
ENSG00000287224	ENSG00000287224.1				MIR924HG	ENSG00000267374.3
ENSG00000287250	ENSG00000287250.1				NDUFV2P1	ENSG00000267809.1
ENSG00000287297	ENSG00000287297.1				ESPNP	ENSG00000268869.6
ENSG00000287584	ENSG00000287584.1				ENSG00000269981	ENSG00000269981.1
ENSG00000288935	ENSG00000288935.1				C1orf21-DT	ENSG00000271387.1
ENSG00000288998	ENSG00000288998.1				ENSG00000272217	ENSG00000272217.1
ENSG00000289317	ENSG00000289317.1				GTF2IP20	ENSG00000272645.4
ENSG00000289371	ENSG00000289371.1				ENSG00000273139	ENSG00000273139.1
ENSG00000289378	ENSG00000289378.1				ENSG00000275263	ENSG00000275263.1
					H3C1	ENSG00000275714.2
					H4C5	ENSG00000276966.3
					H2AC17	ENSG00000278677.2
					ENSG00000278740	ENSG00000278740.1
					ENSG00000284948	ENSG00000284948.1
					NIPBL-DT	ENSG00000285967.1
					ENSG00000286086	ENSG00000286086.1
					ENSG00000286850	ENSG00000286850.1
					ENSG00000287146	ENSG00000287146.1
					ENSG00000288728	ENSG00000288728.1
					ENSG00000288880	ENSG00000288880.1
					ENSG00000289135	ENSG00000289135.1
					ENSG00000289207	ENSG00000289207.1
					ENSG00000289275	ENSG00000289275.1
					ENSG00000289305	ENSG00000289305.1
					ENSG00000289317	ENSG00000289317.1
					ENSG00000289469	ENSG00000289469.1
