# Supplementary material
Source: HighWire-hosted journal article supplement (doi:10.1101/rna.080321.124)
Supplement: Supplemental_Table_S11.xlsx [file Supplemental_Table_S11.xlsx]

## Sheet: Sheet1
RT-stop profile
3 DNA adapter	AGA TCG GAA GAG CAC ACG TCT GAA C/3ddC/
iSp18 PE Reverse	NNN NNN AGA TCG GAA GAG CGT CGT GTA GGG AAA GA/iSp18/G TTC AGA CGT GTG CTC TTC CG
RT stop amp Forward	GTT CAG ACG TGT GCT CTT CCG ATC T
RT stop amp Reverse	TCT TTC CCT ACA CGA CGC TCT TCC G
RT-qPCR
hGapdh Forward	CCTGCACCACCAACTGCTTA
hGapdh Reverse	GGCCATCCACAGTCTTCTGAG
oc43 spikeRT Forward	CCA CGT ACA ATC AAT TCA ACA CA
oc43 spikeRT Reverse	AAT CGT TTG TGG GTA CTC GC
